# Supplementary material for: Ethyl acetate extract of Caesalpinia sappan L. for the treatment of atherosclerosis in ApoE−/− mice and its mechanism
Source: Royal Society of Chemistry journal article supplement (doi:10.1039/d2mo00254j), 2022-10-07
Supplement: d2mo00254j1.xlsx [file d2mo00254j1.xlsx]

## Sheet: pos
X.1

## Sheet: neg
X.1
