# Supplementary material for: Ethyl acetate extract of Caesalpinia sappan L. for the treatment of atherosclerosis in ApoE−/− mice and its mechanism
Source: Royal Society of Chemistry journal article supplement (doi:10.1039/d2mo00254j), 2022-10-07
Supplement: d2mo00254j4.xlsx [file d2mo00254j4.xlsx]

## Sheet: C_vs_S
name	DIFF	LipidIon	LipidGroup	Class	FattyAcid	FA1	FA2	FA3	FA4	IonFormula	CalMz	RT-(min)	QCRSD	Fold Change	P-value	VIP	K2	X4	K5	M8	X6	X7	K3	S5	M3	X9	K6	X8	S6	M6	K4	M7	K1	S4	X5	M4	S2	S1	S3	M2	QC-1	QC-2	QC-3
1009neg	Y	PE(40:4e)-H	PE(40:4e)-H	PE	(40:4e)	(40:4e)				C45 H83 O7 N1 P1	780.591	828.78	0.0823119	0.565812	0.000778363	1.83353	4.60814e+07	4.77927e+07	4.48315e+07	3.54466e+07	3.58706e+07	3.87357e+07	1.87904e+07	1.18847e+07	3.20333e+07	3.7426e+07	9.97054e+06	3.66589e+07	2.73226e+07	2.86403e+07	2.32698e+07	3.33681e+07	2.52366e+07	2.33911e+07	2.82036e+07	2.35402e+07	1.74799e+07	2.31295e+07	2.39232e+07	2.64127e+07	1.1455e+07	1.15254e+07	9.92752e+06
1040neg	Y	PI(36:2)-H	PI(36:2)-H	PI	(36:2)	(36:2)				C45 H82 O13 N0 P1	861.55	579.845	0.00744728	0.651981	0.00216099	5.09466	3.58289e+08	4.24191e+08	2.84529e+08	2.4825e+08	4.92303e+08	4.98142e+08	1.92254e+08	3.10568e+08	3.89438e+08	4.36322e+08	9.88322e+07	4.02158e+08	2.8262e+08	2.58096e+08	1.93936e+08	2.83823e+08	2.63408e+08	2.917e+08	2.97666e+08	2.9826e+08	1.77369e+08	2.9746e+08	3.03346e+08	2.96694e+08	2.53828e+08	2.52931e+08	2.50219e+08
1055neg	Y	PIP2(27:0_24:0)-H	PIP2(51:0)-H	PIP2	(27:0_24:0)	(27:0)	(24:0)			C60 H118 O19 N0 P3	1235.75	703.832	0.0780904	0.487939	0.0175168	1.66592	3.48922e+07	2.09439e+07	3.31883e+07	2.43316e+07	4.70217e+07	1.55142e+07	9.24044e+06	1.52228e+07	1.08805e+07	2.09965e+07	1.38183e+07	3.2658e+07	1.46348e+07	1.67699e+07	1.28033e+07	1.47888e+07	2.20284e+07	1.97012e+07	4.25638e+07	1.91926e+07	1.27741e+07	1.05007e+07	1.48481e+07	2.38525e+07	2.10064e+07	1.84379e+07	1.83638e+07
1070neg	Y	PS(39:3)-H	PS(39:3)-H	PS	(39:3)	(39:3)				C45 H81 O10 N1 P1	826.56	537.503	0.00301709	0.637147	0.0397083	4.25268	4.40193e+08	2.87075e+08	4.69838e+08	2.08563e+08	4.89662e+08	5.1177e+08	1.60086e+08	2.83588e+08	2.67385e+08	4.07306e+08	3.34884e+08	2.69521e+08	2.92773e+08	1.61278e+08	2.71162e+08	2.17042e+08	3.13911e+08	2.48531e+08	2.3268e+08	2.42963e+08	1.05206e+08	2.52682e+08	2.17679e+08	3.10263e+08	2.59612e+08	2.58249e+08	2.5827e+08
108neg	Y	CL(76:12)-H	CL(76:12)-H	CL	(76:12)	(76:12)				C85 H141 O17 P2	1495.96	929.582	0.00969506	0.637418	0.00947435	4.40417	5.60439e+08	2.82966e+08	4.71147e+08	1.90931e+08	3.61124e+08	3.00423e+08	7.63477e+07	1.27057e+08	2.52945e+08	1.92841e+08	1.76984e+08	2.92307e+08	2.36232e+08	1.99279e+08	2.01327e+08	2.57486e+08	3.45817e+08	2.228e+08	3.38067e+08	2.34789e+08	1.06837e+08	1.93983e+08	2.39873e+08	9.91836e+07	2.25952e+08	2.26168e+08	2.22289e+08
118neg	Y	CL(78:13)-H	CL(78:13)-H	CL	(78:13)	(78:13)				C87 H143 O17 P2	1521.98	944.036	0.00826844	0.627512	0.0163244	1.18555	4.71446e+07	2.36776e+07	3.98669e+07	2.10794e+07	2.18675e+07	1.7899e+07	9.89317e+06	9.82514e+06	1.73341e+07	1.43966e+07	1.95316e+07	2.25102e+07	1.64478e+07	1.83376e+07	1.51959e+07	2.13639e+07	2.69796e+07	1.62e+07	3.26579e+07	1.96203e+07	1.02453e+07	1.32501e+07	1.74963e+07	7.06944e+06	1.81997e+07	1.79574e+07	1.7928e+07
122neg	Y	CL(78:15)-H	CL(78:15)-H	CL	(78:15)	(78:15)				C87 H139 O17 P2	1517.95	931.835	0.00764551	0.753502	0.0243995	1.18108	5.28297e+07	3.68722e+07	4.69968e+07	3.10194e+07	4.17579e+07	3.7638e+07	1.76857e+07	1.72745e+07	3.61295e+07	3.05188e+07	1.66894e+07	3.76387e+07	3.43249e+07	3.0513e+07	3.06112e+07	3.32596e+07	4.10407e+07	3.21881e+07	3.92376e+07	3.33899e+07	1.97144e+07	3.03583e+07	3.46704e+07	1.21187e+07	3.42968e+07	3.43001e+07	3.38463e+07
142neg	Y	CL(80:16)-H	CL(80:16)-H	CL	(80:16)	(80:16)				C89 H141 O17 P2	1543.96	908.381	0.00469182	0.560192	0.0251506	1.04432	6.23757e+07	1.32818e+07	4.31797e+07	1.61586e+07	2.39181e+07	1.291e+07	1.20519e+07	5.9716e+06	1.05923e+07	7.29545e+06	2.68177e+07	1.44877e+07	8.74312e+06	1.57135e+07	1.7462e+07	1.20016e+07	2.79274e+07	9.25363e+06	2.18837e+07	1.05697e+07	1.10128e+07	9.17543e+06	8.37633e+06	7.40338e+06	1.49041e+07	1.49061e+07	1.47843e+07
2686pos	Y	LPC(36:1)+Na	LPC(36:1)+Na	LPC	(36:1)	(36:1)				C44 H88 O7 N1 P1 Na1	796.619	743.147	0.0867743	2.79735	0.000154296	1.30845	2.03903e+07	1.12632e+07	5.66517e+06	5.14667e+07	4.29956e+07	3.61638e+07	8.01465e+06	1.23215e+08	6.98392e+07	6.80104e+07	1.15855e+07	3.62239e+07	1.14932e+08	3.95838e+07	9.8203e+06	3.90725e+07	2.99598e+07	1.40745e+08	5.72903e+07	9.26786e+07	7.48414e+07	1.09974e+08	1.41076e+08	1.26011e+08	4.52082e+07	5.14766e+07	5.35564e+07
2848pos	Y	PA(42:6e)+NH4	PA(42:6e)+NH4	PA	(42:6e)	(42:6e)				C45 H83 O7 N1 P1	780.59	738.313	0.0456834	1.51868	0.0328873	1.21023	1.96194e+08	1.91573e+08	1.09336e+08	4.10808e+08	3.18814e+08	2.17156e+08	8.36619e+07	4.30612e+08	3.29395e+08	2.3524e+08	1.67119e+08	2.03354e+08	3.07536e+08	1.97229e+08	1.39698e+08	1.88797e+08	2.10667e+08	5.38569e+08	4.34808e+08	3.68996e+08	2.67819e+08	4.38338e+08	4.48449e+08	3.95526e+08	1.77492e+08	1.93771e+08	1.90163e+08
304neg	Y	Cer(d18:2_22:1)+HCOO	Cer(d40:3)+HCOO	Cer	(d18:2_22:1)	(d18:2)	(22:1)			C41 H76 O5 N1	662.573	714.43	0.0200006	0.690306	0.0379504	1.18503	4.4852e+07	3.80655e+07	4.8163e+07	3.71499e+07	3.02167e+07	3.16551e+07	3.59068e+07	1.03588e+07	3.38571e+07	5.17404e+07	1.28569e+07	3.10911e+07	3.3252e+07	3.32544e+07	3.65712e+07	3.02608e+07	4.57693e+07	3.1783e+07	4.33013e+07	2.77651e+07	2.99193e+07	2.40773e+07	2.66672e+07	3.93977e+07	1.87897e+07	1.94509e+07	1.94611e+07
3079pos	Y	PC(8:1e_24:0)+H	PC(32:1e)+H	PC	(8:1e_24:0)	(8:1e)	(24:0)			C40 H81 O7 N1 P1	718.575	614.345	0.039195	1.71257	0.0257866	1.31634	1.03704e+08	1.5507e+08	1.02435e+08	2.40494e+08	2.61273e+08	1.33142e+08	1.17129e+08	4.12359e+08	2.85112e+08	2.6409e+08	1.06034e+08	1.63715e+08	3.63994e+08	3.19006e+08	9.45592e+07	3.87066e+08	1.22576e+08	3.33961e+08	1.19684e+08	3.29767e+08	2.46331e+08	1.35889e+08	3.86109e+08	4.36071e+08	1.77453e+08	1.90208e+08	1.89929e+08
3262pos	Y	PC(20:0e_14:0)+H	PC(34:0e)+H	PC	(20:0e_14:0)	(20:0e)	(14:0)			C42 H87 O7 N1 P1	748.621	744.927	0.0702772	1.81102	0.0198502	2.69422	4.40491e+08	4.43478e+08	1.85074e+08	7.33731e+08	6.22379e+08	4.43605e+08	1.47783e+08	1.59193e+09	1.03293e+09	7.45462e+08	2.62615e+08	5.50039e+08	9.92179e+08	4.46297e+08	2.48319e+08	5.73554e+08	4.74148e+08	1.48724e+09	1.06633e+09	1.19562e+09	5.21107e+08	1.03704e+09	1.38148e+09	1.64966e+09	4.4272e+08	5.04232e+08	4.97956e+08
3290pos	Y	PC(34:1)+Na	PC(34:1)+Na	PC	(34:1)	(34:1)				C42 H82 O8 N1 P1 Na1	782.567	602.347	0.92652	4.33626	0.0406264	1.14613	1.27192e+08	5.36299e+07	2.62059e+07	1.92571e+07	1.2892e+07	2.74792e+07	1.80977e+07	2.17952e+08	1.85889e+07	1.81843e+07	4.42105e+07	6.41057e+07	5.23259e+07	1.14005e+08	3.29086e+07	1.58827e+08	3.11851e+07	2.80879e+08	2.61217e+07	2.6299e+07	4.16392e+07	2.51205e+08	3.37148e+07	1.53536e+07	2.60593e+07	1.14398e+08	2.53507e+07
3352pos	Y	PC(14:1e_20:0)+H	PC(34:1e)+H	PC	(14:1e_20:0)	(14:1e)	(20:0)			C42 H85 O7 N1 P1	746.606	679.733	0.055066	1.43692	0.00814636	3.21868	1.85968e+09	1.59681e+09	1.65424e+09	2.45939e+09	2.43018e+09	1.57749e+09	1.90371e+09	3.24907e+09	2.50946e+09	2.68316e+09	2.02374e+09	1.44203e+09	2.21916e+09	2.62914e+09	1.76775e+09	3.11119e+09	1.89368e+09	3.1802e+09	2.41192e+09	2.80252e+09	3.02521e+09	2.79643e+09	2.97645e+09	3.23951e+09	1.52513e+09	1.68151e+09	1.67941e+09
33pos	Y	AcCa(18:1)+H	AcCa(18:1)+H	AcCa	(18:1)	(18:1)				C25 H48 O4 N1	426.358	112.693	0.00373014	2.62016	0.0366939	2.07887	7.31796e+08	5.48896e+07	5.97655e+08	6.65923e+08	2.63694e+08	2.97702e+08	4.04626e+08	9.74352e+08	1.03331e+09	2.01338e+08	3.82223e+08	7.30815e+07	2.58809e+08	4.69088e+08	1.8334e+08	2.66735e+08	5.68195e+08	8.64249e+08	3.27446e+08	4.03301e+08	3.70039e+08	4.79105e+08	2.45199e+08	1.18175e+09	4.70044e+08	4.73091e+08	4.70051e+08
3421pos	Y	PC(34:2e)+H	PC(34:2e)+H	PC	(34:2e)	(34:2e)				C42 H83 O7 N1 P1	744.59	626.52	0.0301005	1.5392	0.00270168	2.57096	2.87159e+08	7.35556e+08	2.94172e+08	8.08628e+08	1.02515e+09	8.01273e+08	1.89351e+08	1.52145e+09	1.31012e+09	9.82314e+08	2.55063e+08	7.62218e+08	1.50486e+09	1.06101e+09	2.12684e+08	1.49367e+09	3.50436e+08	1.32304e+09	7.31876e+08	1.20792e+09	8.51215e+08	1.19192e+09	1.36259e+09	1.50761e+09	8.03539e+08	8.48467e+08	8.08278e+08
3461pos	Y	PC(24:0_10:3)+H	PC(34:3)+H	PC	(24:0_10:3)	(24:0)	(10:3)			C42 H79 O8 N1 P1	756.554	515.736	0.00265059	0.483248	0.0240889	3.61378	5.02578e+08	5.35038e+08	1.21468e+09	8.62134e+08	1.48153e+09	1.62902e+09	7.51927e+08	5.41321e+08	9.25737e+08	1.30329e+09	1.09163e+09	4.70965e+08	3.80834e+08	7.05805e+08	6.1541e+08	1.01973e+09	7.42335e+08	5.90058e+08	8.67751e+08	1.03503e+09	4.61674e+08	5.0958e+08	5.55001e+08	1.02918e+09	8.03621e+08	8.07329e+08	8.07314e+08
3617pos	Y	PC(35:5)+H	PC(35:5)+H	PC	(35:5)	(35:5)				C43 H77 O8 N1 P1	766.538	596.038	0.0287632	1.48485	0.00250926	2.64789	1.53881e+09	1.19342e+09	1.94114e+09	2.05621e+09	1.56296e+09	1.04035e+09	1.57201e+09	1.97114e+09	1.70406e+09	1.72849e+09	1.58653e+09	1.49528e+09	1.61547e+09	1.55509e+09	1.58221e+09	1.68827e+09	1.86296e+09	2.43626e+09	1.66925e+09	1.80645e+09	2.52947e+09	2.22267e+09	2.12792e+09	1.88833e+09	1.52662e+09	1.61402e+09	1.55177e+09
3650pos	Y	PC(36:0e)+H	PC(36:0e)+H	PC	(36:0e)	(36:0e)				C44 H91 O7 N1 P1	776.653	814.671	0.0677108	1.65434	0.012629	1.26266	8.70468e+07	1.4209e+08	3.46739e+07	1.88138e+08	1.19378e+08	1.45234e+08	2.38572e+07	3.1783e+08	1.80723e+08	2.59242e+08	4.09788e+07	1.80564e+08	2.72783e+08	1.2247e+08	4.23587e+07	2.05529e+08	9.36621e+07	4.02959e+08	2.51448e+08	2.24702e+08	1.83677e+08	2.7946e+08	3.59679e+08	4.63415e+08	1.10561e+08	1.26178e+08	1.22092e+08
3705pos	Y	PC(14:0e_22:1)+H	PC(36:1e)+H	PC	(14:0e_22:1)	(14:0e)	(22:1)			C44 H89 O7 N1 P1	774.637	728.887	0.0745002	2.83144	0.000559788	4.13736	1.81095e+08	3.87076e+08	7.07175e+07	6.66452e+08	3.93581e+08	3.71077e+08	5.53647e+07	1.39155e+09	8.13478e+08	5.12075e+08	8.99095e+07	3.73863e+08	1.32392e+09	3.89348e+08	7.99505e+07	4.83137e+08	2.12039e+08	1.67023e+09	5.84231e+08	9.2227e+08	6.08822e+08	9.67199e+08	1.46203e+09	1.75582e+09	3.60448e+08	4.14428e+08	4.0746e+08
3782pos	Y	PC(20:1e_16:1)+H	PC(36:2e)+H	PC	(20:1e_16:1)	(20:1e)	(16:1)			C44 H87 O7 N1 P1	772.621	691.634	0.0796456	1.71027	0.0101128	3.26015	6.31313e+08	1.12804e+09	2.60231e+08	1.02631e+09	1.11835e+09	1.11343e+09	1.56044e+08	2.65063e+09	2.43683e+09	1.1662e+09	4.58694e+08	9.85239e+08	1.87924e+09	9.80669e+08	2.59891e+08	1.94627e+09	8.62136e+08	2.00834e+09	1.08465e+09	1.94014e+09	8.70619e+08	1.64101e+09	2.23096e+09	3.0993e+09	8.90722e+08	1.04065e+09	1.00227e+09
3862pos	Y	PC(25:0_11:4)+H	PC(36:4)+H	PC	(25:0_11:4)	(25:0)	(11:4)			C44 H81 O8 N1 P1	782.569	570.686	0.0152847	1.22966	0.0210557	3.70174	1.79748e+10	1.52515e+10	1.96499e+10	1.93704e+10	1.89647e+10	1.48853e+10	1.42347e+10	2.31839e+10	2.11158e+10	1.8978e+10	1.83458e+10	1.52445e+10	1.85585e+10	1.94871e+10	1.56569e+10	2.31886e+10	2.13593e+10	2.32943e+10	2.15038e+10	2.16318e+10	1.84469e+10	2.31205e+10	2.22985e+10	2.10963e+10	1.7837e+10	1.83364e+10	1.78854e+10
4133pos	Y	PC(20:1e_18:1)+H	PC(38:2e)+H	PC	(20:1e_18:1)	(20:1e)	(18:1)			C46 H91 O7 N1 P1	800.653	761.13	0.0790749	2.40088	0.00140105	2.02327	6.27139e+07	1.39359e+08	2.13999e+07	2.39776e+08	1.22019e+08	1.37971e+08	1.77724e+07	3.81186e+08	3.52479e+08	1.82647e+08	2.59792e+07	1.33118e+08	3.8716e+08	1.77057e+08	2.58147e+07	1.74908e+08	6.61889e+07	4.51829e+08	1.5213e+08	3.75126e+08	1.47566e+08	2.9215e+08	4.22261e+08	5.35056e+08	1.32863e+08	1.5283e+08	1.52946e+08
422neg	Y	FA(22:4)-H	FA(22:4)-H	FA	(22:4)	(22:4)				O2 H35 C22	331.264	241.392	0.00493649	0.486223	0.0117921	1.23749	1.01615e+07	2.50865e+07	9.88474e+06	7.21666e+06	1.37878e+07	1.52972e+07	2.97194e+06	1.28008e+07	9.49912e+06	8.72065e+06	7.31759e+06	1.27091e+07	6.25164e+06	3.50792e+06	5.8089e+06	5.69909e+06	7.54269e+06	1.01709e+07	1.92385e+07	6.42508e+06	5.56111e+06	5.17322e+06	6.15567e+06	1.03444e+07	6.62638e+06	6.62635e+06	6.68318e+06
4552pos	Y	PC(16:2e_24:1)+H	PC(40:3e)+H	PC	(16:2e_24:1)	(16:2e)	(24:1)			C48 H93 O7 N1 P1	826.668	764.924	0.0769384	2.36057	0.000752422	1.2271	2.274e+07	5.77849e+07	1.07619e+07	1.38161e+08	4.00889e+07	4.7117e+07	3.19914e+07	1.66956e+08	1.38378e+08	7.15468e+07	1.44239e+07	5.17512e+07	1.56756e+08	5.72792e+07	1.06644e+07	6.03138e+07	3.09878e+07	1.55256e+08	7.12632e+07	1.20545e+08	7.13145e+07	1.04971e+08	1.46283e+08	2.26502e+08	4.66145e+07	5.33931e+07	5.34703e+07
4562pos	Y	PC(16:2e_24:2)+H	PC(40:4e)+H	PC	(16:2e_24:2)	(16:2e)	(24:2)			C48 H91 O7 N1 P1	824.653	754.62	0.0901149	2.05899	0.00328536	1.73028	1.04023e+08	1.66821e+08	3.9399e+07	3.60228e+08	1.20498e+08	1.53293e+08	2.40976e+07	3.98806e+08	2.73336e+08	1.65617e+08	5.054e+07	1.41499e+08	2.45303e+08	1.43274e+08	5.29437e+07	1.38892e+08	1.13158e+08	5.1133e+08	3.12383e+08	2.83889e+08	2.81392e+08	3.29371e+08	4.1656e+08	5.18291e+08	1.17165e+08	1.36678e+08	1.38359e+08
4618pos	Y	PC(18:3_22:3)+H	PC(40:6)+H	PC	(18:3_22:3)	(18:3)	(22:3)			C48 H85 O8 N1 P1	834.601	644.46	0.0296024	1.89823	0.0115672	4.91477	3.67124e+09	8.58862e+08	4.25988e+09	3.49034e+09	3.4535e+08	3.26805e+09	1.10279e+09	3.21688e+09	5.16185e+08	2.49772e+09	3.33384e+09	3.49651e+09	3.8295e+09	3.93834e+09	4.2291e+08	3.12478e+08	2.98786e+09	4.4003e+09	1.71625e+09	3.74995e+09	2.91351e+09	4.12289e+09	4.6425e+09	3.74289e+09	2.96076e+09	3.11279e+09	3.12262e+09
4838pos	Y	PC(20:1e_22:4)+H	PC(42:5e)+H	PC	(20:1e_22:4)	(20:1e)	(22:4)			C50 H93 O7 N1 P1	850.668	742.729	0.0869001	2.31437	0.000586527	1.5201	4.68173e+07	7.89704e+07	1.89281e+07	1.69689e+08	6.892e+07	7.32752e+07	1.14005e+07	2.50933e+08	1.56788e+08	9.61841e+07	2.54555e+07	7.6588e+07	1.85512e+08	6.85733e+07	2.62186e+07	7.50942e+07	5.40444e+07	2.61984e+08	1.49701e+08	1.33175e+08	1.45138e+08	1.64849e+08	2.49766e+08	2.86899e+08	6.1604e+07	7.12681e+07	7.24413e+07
5086pos	Y	PE(18:1_18:1)+Na	PE(36:2)+Na	PE	(18:1_18:1)	(18:1)	(18:1)			C41 H78 O8 N1 P1 Na1	766.536	616.192	0.0358654	1.3697	0.0298746	1.1864	5.02721e+08	5.06719e+08	5.93145e+08	6.22669e+08	6.62653e+08	5.60324e+08	3.47838e+08	9.0475e+08	7.75053e+08	5.8433e+08	4.15728e+08	5.08468e+08	5.80745e+08	4.96435e+08	3.25259e+08	6.14958e+08	5.13525e+08	1.08111e+09	7.07302e+08	1.04741e+09	5.83731e+08	8.41456e+08	8.4298e+08	8.25925e+08	5.04209e+08	5.36842e+08	5.36925e+08
5178pos	Y	PE(36:4)+H	PE(36:4)+H	PE	(36:4)	(36:4)				C41 H75 O8 N1 P1	740.522	589.726	0.018059	1.46106	0.00478591	1.94366	9.76041e+08	4.66531e+08	1.23466e+09	1.07715e+09	9.1081e+08	5.22424e+08	8.68135e+08	1.11845e+09	1.03118e+09	9.3485e+08	8.94188e+08	7.23026e+08	8.80875e+08	8.53746e+08	8.15053e+08	1.04938e+09	1.16903e+09	1.11109e+09	8.67197e+08	1.06681e+09	1.18428e+09	1.14755e+09	1.02271e+09	1.21876e+09	8.72484e+08	9.00358e+08	9.00354e+08
5270pos	Y	PE(20:1p_18:2)+H	PE(38:3p)+H	PE	(20:1p_18:2)	(20:1p)	(18:2)			C43 H81 O7 N1 P1	754.575	698.844	0.0657094	1.54589	0.0339233	1.15032	1.61211e+08	1.66942e+08	7.34182e+07	1.68885e+08	3.04745e+08	1.70174e+08	9.11403e+07	4.2986e+08	2.0985e+08	2.90423e+08	1.26453e+08	1.65515e+08	2.45123e+08	1.4439e+08	1.13877e+08	1.55662e+08	1.40208e+08	3.87443e+08	2.20731e+08	2.37638e+08	1.87792e+08	3.56319e+08	4.31759e+08	3.47058e+08	1.48414e+08	1.67673e+08	1.65502e+08
541pos	Y	Cer(d20:0_24:5)+H	Cer(d44:5)+H	Cer	(d20:0_24:5)	(d20:0)	(24:5)			C44 H80 O3 N1	670.613	850.26	0.0526115	1.51463	0.0179331	1.07996	2.72275e+08	1.39259e+08	2.49624e+08	4.634e+08	2.47532e+08	1.62129e+08	2.67626e+08	3.35463e+08	3.49247e+08	2.69826e+08	2.39384e+08	2.34047e+08	2.46284e+08	2.38702e+08	2.43856e+08	2.58138e+08	3.23602e+08	4.25523e+08	3.55478e+08	2.4421e+08	4.35345e+08	3.62135e+08	3.28267e+08	4.24693e+08	2.23197e+08	2.45046e+08	2.44652e+08
5477pos	Y	PE(40:5e)+H	PE(40:5e)+H	PE	(40:5e)	(40:5e)				C45 H83 O7 N1 P1	780.59	753.337	0.0492011	1.62423	0.00790614	1.15783	1.65133e+08	1.76218e+08	1.15093e+08	2.63895e+08	1.38891e+08	1.50928e+08	5.68624e+07	2.87978e+08	2.16403e+08	1.58605e+08	1.20413e+08	1.61921e+08	2.56343e+08	1.35403e+08	9.90115e+07	1.36665e+08	1.73913e+08	3.97017e+08	2.9125e+08	2.33169e+08	2.15656e+08	2.79897e+08	3.13729e+08	3.01624e+08	1.32124e+08	1.44086e+08	1.44038e+08
5597pos	Y	PE(20:0p_22:6)+H	PE(42:6p)+H	PE	(20:0p_22:6)	(20:0p)	(22:6)			C47 H83 O7 N1 P1	804.59	728.4	0.042252	1.54485	0.0440555	2.48961	7.32343e+08	7.61226e+08	6.01948e+08	9.39822e+08	1.24081e+09	7.23208e+08	1.09916e+08	1.71532e+09	1.38409e+09	8.13384e+08	5.79345e+08	9.30703e+08	1.53244e+09	7.05898e+08	3.50691e+08	8.00372e+08	6.8665e+08	2.00773e+09	1.47923e+09	1.08227e+09	6.22917e+08	1.46378e+09	1.84745e+09	2.08604e+09	6.68226e+08	7.26563e+08	7.05988e+08
60neg	Y	CL(70:5)-H	CL(70:5)-H	CL	(70:5)	(70:5)				C79 H143 O17 P2	1425.98	1003.99	0.00148035	0.643099	0.000111152	1.6862	2.64757e+07	3.73846e+07	3.90878e+07	5.45874e+07	3.7463e+07	4.26805e+07	2.95244e+07	2.20063e+07	3.77875e+07	3.53414e+07	2.73997e+07	3.38128e+07	2.88106e+07	3.40542e+07	2.62575e+07	3.63844e+07	4.45118e+07	2.7104e+07	3.18395e+07	3.46289e+07	2.07284e+07	2.14673e+07	2.04145e+07	1.24874e+07	2.58715e+07	2.59379e+07	2.58716e+07
747neg	Y	LPI(18:0)-H	LPI(18:0)-H	LPI	(18:0)	(18:0)				C27 H52 O12 N0 P1	599.32	113.705	0.00521683	0.662768	0.00152514	2.65325	1.02386e+08	1.43058e+08	6.60175e+07	1.03778e+08	1.25364e+08	1.30959e+08	1.18643e+08	9.19711e+07	1.15204e+08	1.77644e+08	9.30502e+07	1.19474e+08	9.72228e+07	9.50355e+07	6.27338e+07	1.04579e+08	9.92783e+07	8.67118e+07	1.05742e+08	1.01141e+08	7.99097e+07	8.40293e+07	9.1855e+07	9.07833e+07	8.53916e+07	8.61691e+07	8.61666e+07
750neg	Y	LPI(18:2)-H	LPI(18:2)-H	LPI	(18:2)	(18:2)				C27 H48 O12 N0 P1	595.289	72.8103	0.0111075	0.426609	0.0040366	1.65995	2.20613e+07	2.06571e+07	2.48982e+07	1.61169e+07	3.51333e+07	3.47965e+07	7.38838e+06	1.50836e+07	1.87034e+07	2.77462e+07	1.62262e+07	1.82289e+07	1.28368e+07	1.16041e+07	1.14478e+07	1.6997e+07	1.61322e+07	1.23574e+07	1.38674e+07	1.70049e+07	6.03465e+06	9.60432e+06	8.25768e+06	2.8408e+07	1.34626e+07	1.36396e+07	1.33419e+07
753neg	Y	LPI(20:4)-H	LPI(20:4)-H	LPI	(20:4)	(20:4)				C29 H48 O12 N0 P1	619.289	77.1457	0.00142689	0.668335	0.0192584	2.58383	8.80931e+07	1.52289e+08	9.43832e+07	9.56188e+07	1.48555e+08	1.47236e+08	2.42976e+07	1.05298e+08	1.17509e+08	9.96616e+07	7.99114e+07	1.13079e+08	1.02852e+08	6.58374e+07	3.33315e+07	9.19179e+07	7.94086e+07	1.10193e+08	1.0379e+08	1.01856e+08	3.66561e+07	7.04893e+07	8.55269e+07	1.43613e+08	8.35953e+07	8.33891e+07	8.33891e+07
912neg	Y	PC(38:8e)+HCOO	PC(38:8e)+HCOO	PC	(38:8e)	(38:8e)				C47 H79 O9 N1 P1	832.55	560.411	0.0221875	0.37622	0.000423976	1.18798	2.77678e+07	1.12147e+07	1.61911e+07	9.05967e+06	1.01868e+07	1.30748e+07	2.02204e+07	3.40018e+06	2.04325e+06	1.31256e+07	7.09949e+06	1.38174e+07	2.15762e+06	1.40913e+07	2.67211e+07	1.68056e+07	1.83856e+07	2.69118e+06	1.01129e+07	9.3389e+06	1.05601e+07	5.05526e+06	3.04742e+06	1.67144e+07	4.00205e+06	4.0049e+06	3.85159e+06
944neg	Y	PE(10:0_11:4)-H	PE(21:4)-H	PE	(10:0_11:4)	(10:0)	(11:4)			C26 H43 O8 N1 P1	528.273	94.6191	0.0318452	1.54881	0.0118785	1.39688	1.79149e+07	1.09614e+07	3.85347e+06	3.11684e+07	1.44788e+07	2.1525e+07	7.27746e+06	2.23413e+07	1.34044e+07	9.31236e+06	1.34681e+07	1.52531e+07	1.42509e+07	3.01589e+07	7.83212e+06	8.10368e+06	1.93029e+07	2.6525e+07	1.67611e+07	2.36251e+07	2.1378e+07	2.50426e+07	2.72098e+07	2.89309e+07	6.64854e+06	7.02906e+06	7.02946e+06
947neg	Y	PE(29:4)-H	PE(29:4)-H	PE	(29:4)	(29:4)				C34 H59 O8 N1 P1	640.398	65.5658	0.00873708	2.52377	0.0325531	1.40819	3.85573e+06	1.22877e+07	7.43695e+06	4.5012e+06	8.83988e+06	4.0761e+06	2.74053e+06	1.24634e+07	7.1968e+06	4.32475e+06	4.37665e+06	3.80748e+06	2.14082e+07	6.22498e+06	988751	3.84038e+06	3.29928e+06	3.14744e+07	4.53419e+06	9.01713e+06	8.78436e+06	1.16735e+07	9.77143e+06	1.47014e+07	1.2827e+07	1.30223e+07	1.30239e+07
991neg	Y	PE(18:2_18:2)-H	PE(36:4)-H	PE	(18:2_18:2)	(18:2)	(18:2)			C41 H73 O8 N1 P1	738.508	580.972	0.00777844	1.1376	0.00629846	3.65539	4.52772e+08	3.72451e+08	4.34384e+08	4.09487e+08	3.80145e+08	4.05919e+08	3.44717e+08	4.27856e+08	4.13431e+08	3.93628e+08	1.31916e+08	3.40122e+08	4.7288e+08	3.34609e+08	4.447e+08	3.84682e+08	4.14718e+08	4.10025e+08	3.6598e+08	4.27284e+08	4.42482e+08	4.27941e+08	3.87784e+08	4.13304e+08	3.7447e+08	3.69476e+08	3.69464e+08
1002neg		PE(38:5e)-H	PE(38:5e)-H	PE	(38:5e)	(38:5e)				C43 H77 O7 N1 P1	750.544	670.983	0.00453153	1.01759	0.90769	0.987586	9.75746e+07	1.22606e+08	9.25706e+07	1.82859e+08	1.2763e+08	1.25641e+08	1.14815e+08	5.5295e+07	1.2707e+08	1.26533e+08	4.0818e+07	1.12266e+08	1.16738e+08	1.33352e+08	1.31009e+08	1.02973e+08	1.10579e+08	1.4843e+08	1.24062e+08	1.3948e+08	1.8794e+08	1.34671e+08	1.08662e+08	1.12488e+08	1.16201e+08	1.15302e+08	1.15285e+08
1003neg		PE(39:5)-H	PE(39:5)-H	PE	(39:5)	(39:5)				C44 H77 O8 N1 P1	778.539	543.98	0.0162071	1.06763	0.741699	0.40523	2.70338e+06	8.49795e+06	4.5366e+06	1.02927e+07	4.30687e+06	1.20469e+07	8.1145e+06	9.63147e+06	5.4689e+06	8.07349e+06	3.90927e+06	5.04793e+06	6.593e+06	7.0479e+06	6.41893e+06	3.05699e+06	5.45968e+06	5.38522e+06	6.3765e+06	8.75668e+06	1.15749e+07	7.06816e+06	7.09608e+06	5.60775e+06	4.53358e+06	4.40342e+06	4.52472e+06
1005neg		PE(17:0_22:6)-H	PE(39:6)-H	PE	(17:0_22:6)	(17:0)	(22:6)			C44 H75 O8 N1 P1	776.524	581.205	0.0109574	0.867117	0.278983	0.884913	1.91796e+08	8.72289e+07	1.64684e+08	6.65474e+07	8.66911e+07	1.09982e+08	4.69641e+07	7.45821e+07	8.90742e+07	8.35902e+07	4.27006e+07	7.81924e+07	9.92295e+07	6.5061e+07	8.99333e+07	8.49095e+07	1.37679e+08	7.30524e+07	7.04256e+07	8.57178e+07	3.87069e+07	7.30412e+07	8.89161e+07	1.03351e+08	8.4941e+07	8.49422e+07	8.33397e+07
1006pos		CerP(m19:0_17:0)+H	CerP(m36:0)+H	CerP	(m19:0_17:0)	(m19:0)	(17:0)			C36 H75 O5 N1 P1	632.538	796.654	0.127693	1.22272	0.108903	0.212045	2.78212e+08	2.39747e+08	2.47609e+08	2.34436e+08	2.37152e+08	2.17685e+08	2.2344e+08	3.00603e+08	3.63887e+08	2.47268e+08	2.09189e+08	2.13825e+08	2.12707e+08	2.15957e+08	2.4205e+08	2.27301e+08	2.8445e+08	4.01253e+08	2.89784e+08	2.11756e+08	2.27568e+08	2.91372e+08	3.33896e+08	4.17076e+08	1.96705e+08	2.45437e+08	2.49716e+08
100neg		CL(74:8)-H	CL(74:8)-H	CL	(74:8)	(74:8)				C83 H145 O17 P2	1476	1010.35	0.00833453	1.01841	0.906248	0.289116	9.74345e+06	1.10351e+07	1.19445e+07	2.54987e+07	5.03815e+06	8.99724e+06	1.45223e+07	5.26204e+06	9.53213e+06	7.93096e+06	1.1316e+07	9.2816e+06	8.13521e+06	1.50158e+07	1.00675e+07	9.32472e+06	1.70571e+07	1.04135e+07	1.04287e+07	1.2615e+07	1.25334e+07	9.5482e+06	7.7897e+06	4.04452e+06	1.10438e+07	1.12038e+07	1.10434e+07
1010neg		PE(18:0_22:5)-H	PE(40:5)-H	PE	(18:0_22:5)	(18:0)	(22:5)			C45 H79 O8 N1 P1	792.555	673.522	0.0047979	0.897957	0.535251	3.03649	7.6893e+08	2.01941e+09	7.78582e+08	1.51097e+09	1.64845e+09	1.73173e+09	1.43728e+08	6.62589e+08	1.62198e+09	1.20447e+09	1.61687e+08	1.52502e+09	1.74415e+09	1.28478e+09	4.80494e+08	1.4911e+09	6.37301e+08	2.07769e+09	1.64611e+09	1.93892e+09	8.4426e+08	1.58441e+09	1.86461e+09	1.72248e+09	1.36831e+09	1.35702e+09	1.35699e+09
1012neg		PE(40:5e)-H	PE(40:5e)-H	PE	(40:5e)	(40:5e)				C45 H81 O7 N1 P1	778.576	731.224	0.00473476	1.05331	0.71825	1.31832	9.07701e+07	2.17672e+08	8.4616e+07	2.16147e+08	2.01198e+08	2.19459e+08	4.93466e+07	8.74593e+07	1.95801e+08	1.84471e+08	2.48552e+07	1.78875e+08	2.28565e+08	1.69969e+08	8.23324e+07	1.64028e+08	8.68648e+07	2.67464e+08	2.20361e+08	1.95307e+08	1.94947e+08	2.79439e+08	2.29312e+08	1.9722e+08	1.44551e+08	1.45925e+08	1.45282e+08
1014pos		CerP(m19:0_17:1)+H	CerP(m36:1)+H	CerP	(m19:0_17:1)	(m19:0)	(17:1)			C36 H73 O5 N1 P1	630.522	720.041	0.117983	1.05496	0.674025	0.363891	1.20711e+08	9.14502e+07	1.19211e+08	1.10659e+08	1.6034e+08	8.50037e+07	8.87725e+07	1.19205e+08	1.3763e+08	1.08728e+08	1.05593e+08	1.0742e+08	1.01727e+08	1.14659e+08	9.63084e+07	1.06884e+08	1.53951e+08	1.58812e+08	1.22882e+08	1.01032e+08	1.17976e+08	1.20795e+08	9.44536e+07	1.28254e+08	8.42939e+07	1.04553e+08	1.03901e+08
1016pos		CerP(m19:0_18:0)+H	CerP(m37:0)+H	CerP	(m19:0_18:0)	(m19:0)	(18:0)			C37 H77 O5 N1 P1	646.553	827.446	0.12472	1.36074	0.24716	0.28123	9.81053e+07	7.87348e+07	7.39891e+07	5.49363e+07	7.50065e+07	6.18133e+07	1.8032e+07	1.94943e+08	1.7418e+08	1.03377e+08	5.80725e+07	6.1482e+07	6.67776e+07	6.84883e+07	8.01092e+07	6.3375e+07	7.18925e+07	1.34114e+08	1.53814e+08	5.87776e+07	6.28523e+07	1.027e+08	1.65556e+08	1.95927e+08	5.54552e+07	7.09415e+07	6.69292e+07
1017neg		PE(20:3e_20:3)-H	PE(40:6e)-H	PE	(20:3e_20:3)	(20:3e)	(20:3)			C45 H79 O7 N1 P1	776.56	676.5	0.0152734	0.980911	0.891551	1.40706	2.24577e+08	3.2681e+08	2.13652e+08	2.7015e+08	3.34557e+08	4.05199e+08	1.05823e+08	1.61913e+08	3.1389e+08	3.53196e+08	7.66294e+07	3.03012e+08	4.4765e+08	2.9381e+08	1.68779e+08	3.02194e+08	2.24813e+08	3.74751e+08	3.49021e+08	2.89231e+08	2.48981e+08	4.20332e+08	3.78617e+08	2.99286e+08	2.94712e+08	2.94725e+08	2.8699e+08
1017pos		CerP(m19:0_19:0)+H	CerP(m38:0)+H	CerP	(m19:0_19:0)	(m19:0)	(19:0)			C38 H79 O5 N1 P1	660.569	860.953	0.0441105	1.34154	0.156179	0.452763	1.95455e+08	1.31491e+08	1.52032e+08	1.41552e+08	1.48607e+08	1.05586e+08	4.7254e+07	2.89603e+08	3.26273e+08	2.44303e+08	1.58253e+08	1.46037e+08	1.49076e+08	1.50577e+08	1.4283e+08	1.42126e+08	1.69257e+08	2.6294e+08	2.67127e+08	1.45965e+08	1.43264e+08	2.6422e+08	2.90329e+08	3.41816e+08	1.4562e+08	1.59031e+08	1.51818e+08
1018neg		PE(22:5_18:2)-H	PE(40:7)-H	PE	(22:5_18:2)	(22:5)	(18:2)			C45 H75 O8 N1 P1	788.524	567.785	0.0101811	0.945444	0.513844	0.617007	1.87833e+09	1.22807e+09	1.76627e+09	1.14036e+09	1.09171e+09	1.24827e+09	8.57959e+08	1.0413e+09	1.38228e+09	1.0005e+09	5.69169e+08	1.12102e+09	1.14205e+09	1.16476e+09	1.30429e+09	1.26364e+09	1.80594e+09	1.2647e+09	1.31619e+09	1.18287e+09	7.31782e+08	1.21522e+09	1.22851e+09	1.3119e+09	1.17368e+09	1.15334e+09	1.15312e+09
1018pos		CerP(m19:0_20:1)+H	CerP(m39:1)+H	CerP	(m19:0_20:1)	(m19:0)	(20:1)			C39 H79 O5 N1 P1	672.569	828.437	0.146241	1.54892	0.21595	0.370984	6.11762e+07	1.37521e+07	4.39891e+07	4.40442e+07	4.10489e+07	3.99481e+07	2.8756e+07	1.4927e+08	8.80586e+07	5.53774e+07	4.56146e+07	4.03355e+07	3.77788e+07	4.51633e+07	4.47746e+07	4.13541e+07	5.415e+07	6.91591e+07	8.48464e+07	4.18992e+07	4.54307e+07	5.39704e+07	7.08213e+07	1.07456e+08	3.67429e+07	4.78485e+07	4.803e+07
101neg		CL(74:9)-H	CL(74:9)-H	CL	(74:9)	(74:9)				C83 H143 O17 P2	1473.98	964.82	0.013728	0.808086	0.258908	1.661	2.09296e+08	2.15184e+08	2.10886e+08	1.60786e+08	8.29739e+07	2.03995e+08	4.6506e+07	1.05511e+08	1.79587e+08	1.60171e+08	7.28746e+07	2.08896e+08	1.93372e+08	1.50385e+08	1.00102e+08	2.068e+08	1.70935e+08	1.67828e+08	2.14866e+08	1.93549e+08	7.33143e+07	1.4738e+08	1.90244e+08	6.05861e+07	1.28521e+08	1.31602e+08	1.31651e+08
101pos		AcCa(22:2)+H	AcCa(22:2)+H	AcCa	(22:2)	(22:2)				C29 H54 O4 N1	480.405	167.769	0.0167147	1.58335	0.282017	0.526834	8.16202e+07	1.68153e+08	1.10772e+07	1.09205e+08	1.31077e+08	1.55406e+08	6.85537e+07	2.63493e+08	6.53579e+07	3.10147e+08	1.65295e+08	7.3049e+07	4.95479e+07	7.18133e+07	2.22868e+07	2.17814e+08	5.55193e+07	4.75248e+08	1.4842e+08	1.9169e+08	1.10743e+08	5.03346e+08	1.59203e+08	1.41769e+08	1.56484e+08	1.56428e+08	1.5197e+08
1021neg		PE(42:6)-H	PE(42:6)-H	PE	(42:6)	(42:6)				C47 H81 O8 N1 P1	818.571	680.76	0.00471766	1.01685	0.936724	0.475086	2.15988e+07	2.30448e+07	2.52248e+07	2.29013e+07	2.34299e+07	3.01475e+07	3.22972e+06	9.62026e+06	2.18811e+07	1.67299e+07	3.95353e+06	2.16559e+07	2.7603e+07	1.68901e+07	1.12678e+07	2.37876e+07	1.94333e+07	3.53783e+07	1.91969e+07	2.9783e+07	1.17769e+07	2.15098e+07	3.05783e+07	2.83503e+07	2.00339e+07	1.98708e+07	1.98713e+07
1023neg		PG(16:0_16:0)-H	PG(32:0)-H	PG	(16:0_16:0)	(16:0)	(16:0)			C38 H74 O10 N0 P1	721.503	564.78	0.0142304	0.809641	0.169069	0.447812	1.6667e+07	1.23836e+07	1.83153e+07	1.43603e+07	2.23283e+07	2.45722e+07	1.58666e+07	1.82029e+07	1.55764e+07	2.10983e+07	6.77135e+06	1.44241e+07	1.50846e+07	1.15829e+07	1.76472e+07	1.62755e+07	1.48743e+07	1.35568e+07	1.32405e+07	1.50483e+07	1.51321e+07	1.32549e+07	1.22481e+07	1.72101e+07	1.26401e+07	1.2967e+07	1.29456e+07
1024neg		PG(33:1)-H	PG(33:1)-H	PG	(33:1)	(33:1)				C39 H74 O10 N0 P1	733.503	537.991	0.0636918	0.9341	0.648262	0.245125	1.18084e+07	7.25227e+06	9.24812e+06	9.70778e+06	8.32619e+06	1.03886e+07	1.00032e+07	9.83869e+06	6.4352e+06	1.36689e+07	9.21237e+06	6.90798e+06	8.56607e+06	7.28336e+06	1.11052e+07	7.77664e+06	1.00625e+07	6.7964e+06	8.4989e+06	8.04993e+06	1.16172e+07	6.73885e+06	7.85828e+06	9.34498e+06	6.04955e+06	6.76545e+06	6.77427e+06
1025neg		PG(34:1)-H	PG(34:1)-H	PG	(34:1)	(34:1)				C40 H76 O10 N0 P1	747.518	570.48	0.0173014	1.0018	0.983396	3.07558	1.75183e+09	1.40621e+09	1.82954e+09	1.298e+09	1.42219e+09	1.67615e+09	7.27776e+08	1.45887e+09	1.30916e+09	1.20175e+09	4.94204e+08	1.2452e+09	1.47333e+09	1.23013e+09	1.06875e+09	1.43337e+09	1.56286e+09	1.53138e+09	1.35185e+09	1.31881e+09	9.23573e+08	1.40491e+09	1.52624e+09	1.49368e+09	1.05299e+09	1.02181e+09	1.05312e+09
1029neg		PG(14:1_21:0)-H	PG(35:1)-H	PG	(14:1_21:0)	(14:1)	(21:0)			C41 H78 O10 N0 P1	761.534	173.097	0.0059056	1.13866	0.764211	0.324726	3.75745e+07	5.34129e+06	2.49469e+07	2.17766e+07	1.28968e+07	1.1451e+07	1.03051e+07	8.70423e+06	5.18342e+06	3.22808e+06	3.7634e+07	2.5547e+06	1.7848e+06	1.36695e+07	1.59713e+07	790952	1.78687e+07	1.1048e+07	3.11915e+06	1.86861e+07	4.82948e+06	1.54842e+07	2.09115e+06	1.57605e+07	1.41076e+07	1.4163e+07	1.42722e+07
102neg		CL(74:9)-H	CL(74:9)-H	CL	(74:9)	(74:9)				C83 H143 O17 P2	1473.98	989.269	0.0711804	0.798231	0.256012	0.524605	1.13766e+07	2.64721e+07	2.68914e+07	4.47044e+07	1.12564e+07	2.41512e+07	3.09109e+07	1.67438e+07	2.30767e+07	4.35959e+07	3.5549e+07	2.6397e+07	2.14311e+07	2.60104e+07	2.21442e+07	2.30413e+07	3.29236e+07	2.37107e+07	2.33522e+07	2.7535e+07	2.06178e+07	2.10064e+07	2.03954e+07	8.31478e+06	3.31175e+07	2.93664e+07	2.93231e+07
1030neg		PG(16:1_20:2)-H	PG(36:3)-H	PG	(16:1_20:2)	(16:1)	(20:2)			C42 H76 O10 N0 P1	771.518	492.72	0.000836818	1.14928	0.397439	1.10245	9.57933e+07	3.25577e+07	8.9999e+07	5.10057e+07	3.32218e+07	6.10921e+07	2.81461e+07	4.35237e+07	6.07607e+07	3.89496e+07	6.95036e+07	4.57714e+07	5.54031e+07	4.2189e+07	4.99773e+07	4.81701e+07	6.16195e+07	6.30846e+07	3.88102e+07	3.95836e+07	2.44315e+07	5.5858e+07	4.54819e+07	8.66156e+07	3.65726e+07	3.66257e+07	3.66257e+07
1031neg		PG(24:2_12:2)-H	PG(36:4)-H	PG	(24:2_12:2)	(24:2)	(12:2)			C42 H74 O10 N0 P1	769.503	425.874	0.0251294	0.814498	0.354756	0.503076	5.99658e+07	1.53562e+07	5.01369e+07	1.69737e+07	2.99595e+07	3.84844e+07	1.18962e+07	1.82977e+07	2.45933e+07	2.46329e+07	2.91009e+07	2.33562e+07	2.31698e+07	1.61509e+07	2.09633e+07	1.9634e+07	3.74608e+07	2.03673e+07	1.33634e+07	1.47993e+07	9.20492e+06	2.87405e+07	1.84462e+07	3.48204e+07	1.78762e+07	1.78413e+07	1.8647e+07
1032neg		PG(18:2_18:2)-H	PG(36:4)-H	PG	(18:2_18:2)	(18:2)	(18:2)			C42 H74 O10 N0 P1	769.503	503.667	0.0639899	1.11717	0.361304	0.873691	2.90728e+07	3.39449e+07	2.59276e+07	3.82103e+07	2.75624e+07	3.90464e+07	1.15153e+07	4.32403e+07	4.15229e+07	2.48821e+07	2.55217e+07	3.52792e+07	4.49696e+07	2.54733e+07	1.73975e+07	3.10487e+07	2.78591e+07	3.67486e+07	3.43869e+07	3.65899e+07	2.21166e+07	3.7797e+07	3.30904e+07	4.44674e+07	2.03096e+07	2.02954e+07	2.2639e+07
1036neg		PG(38:6)-H	PG(38:6)-H	PG	(38:6)	(38:6)				C44 H74 O10 N0 P1	793.503	406.608	0.0140008	0.948466	0.64092	0.090918	8.64036e+06	9.28897e+06	7.07854e+06	1.03928e+07	9.69052e+06	1.58107e+07	1.0445e+06	9.59128e+06	1.18265e+07	9.21352e+06	4.05854e+06	1.33018e+07	1.13813e+07	1.10011e+07	3.07939e+06	1.05717e+07	7.8432e+06	1.05119e+07	1.08836e+07	9.38699e+06	9.88193e+06	1.32069e+07	1.01018e+07	1.43456e+07	7.94733e+06	7.75518e+06	7.76026e+06
1037neg		PG(40:8)-H	PG(40:8)-H	PG	(40:8)	(40:8)				C46 H74 O10 N0 P1	817.503	440.708	0.00337835	1.11995	0.343434	0.596386	2.41689e+07	1.4023e+07	2.00849e+07	2.04277e+07	1.11797e+07	1.12339e+07	6.8059e+06	1.78702e+07	1.89289e+07	9.36219e+06	1.89253e+07	1.50475e+07	1.46713e+07	1.92219e+07	1.07528e+07	1.35288e+07	2.06919e+07	1.48998e+07	1.94187e+07	1.26231e+07	1.49646e+07	1.45618e+07	1.29252e+07	2.1766e+07	1.43349e+07	1.4313e+07	1.42425e+07
1038neg		PI(34:2)-H	PI(34:2)-H	PI	(34:2)	(34:2)				C43 H78 O13 N0 P1	833.519	516.74	0.00306505	0.602139	0.0816807	2.25564	8.92531e+07	7.52112e+07	6.3288e+07	8.26601e+07	1.67843e+08	2.0501e+08	7.96798e+07	8.44066e+07	1.18581e+08	1.69868e+08	6.8762e+07	9.15444e+07	8.45987e+07	6.92655e+07	6.80457e+07	6.97409e+07	6.90597e+07	5.76677e+07	5.90247e+07	9.39553e+07	1.12031e+08	7.76536e+07	4.63866e+07	8.88353e+07	8.09565e+07	8.05304e+07	8.05262e+07
103neg		CL(75:11)-H	CL(75:11)-H	CL	(75:11)	(75:11)				C84 H141 O17 P2	1483.96	942.206	0.0285813	0.680159	0.11632	0.135242	2.10332e+06	494909	1.85493e+06	586587	233494	424780	413415	301392	356943	455842	833867	591558	382348	506674	640004	419374	1.11211e+06	372029	852107	473074	211401	283632	525512	130515	423456	402841	423472
103pos		AcCa(22:2)+H	AcCa(22:2)+H	AcCa	(22:2)	(22:2)				C29 H54 O4 N1	480.405	210.75	0.0145143	1.43002	0.645081	0.0696412	3.54721e+06	2.10764e+07	3.35421e+06	1.3213e+07	1.38883e+07	2.96509e+07	1.27273e+07	7.88853e+06	1.63952e+07	1.0881e+07	2.87285e+07	1.01442e+07	9.07574e+06	1.07563e+07	8.32861e+06	3.01977e+07	1.85084e+06	1.13169e+08	3.10905e+07	2.51769e+07	3.50163e+06	1.80911e+07	1.52021e+07	1.96351e+07	2.50282e+07	2.43408e+07	2.48652e+07
1042neg		PI(37:4)-H	PI(37:4)-H	PI	(37:4)	(37:4)				C46 H80 O13 N0 P1	871.534	529.68	0.00395189	0.990726	0.934385	0.295657	3.87006e+07	3.09734e+07	2.54493e+07	2.56646e+07	2.94911e+07	3.58921e+07	1.8315e+07	3.82943e+07	3.22219e+07	3.24471e+07	2.75614e+07	2.54106e+07	3.76925e+07	2.37986e+07	1.7555e+07	2.25449e+07	3.19309e+07	2.84262e+07	2.54631e+07	3.28142e+07	2.08102e+07	2.57325e+07	2.70553e+07	3.04413e+07	2.62676e+07	2.60756e+07	2.61053e+07
1043neg		PI(20:0_18:3)-H	PI(38:3)-H	PI	(20:0_18:3)	(20:0)	(18:3)			C47 H84 O13 N0 P1	887.566	603.245	0.00309048	0.792809	0.118907	1.006	6.2665e+07	5.19441e+07	4.08861e+07	4.05296e+07	4.61371e+07	3.96551e+07	3.66892e+07	2.35034e+07	3.37378e+07	5.29189e+07	1.5782e+07	5.21912e+07	3.552e+07	3.23311e+07	3.61689e+07	3.51387e+07	5.35263e+07	5.14159e+07	4.67511e+07	4.2999e+07	2.24922e+07	4.33331e+07	5.3331e+07	3.68181e+07	4.1631e+07	4.18542e+07	4.16308e+07
1044neg		PI(26:1_12:3)-H	PI(38:4)-H	PI	(26:1_12:3)	(26:1)	(12:3)			C47 H82 O13 N0 P1	885.55	564.716	0.00383316	0.973637	0.705325	3.68389	2.83283e+09	4.09127e+09	2.25704e+09	3.24533e+09	3.56515e+09	3.79967e+09	1.76991e+09	3.7639e+09	3.71226e+09	2.86531e+09	7.5295e+08	3.42586e+09	3.59039e+09	2.92476e+09	1.56891e+09	2.6579e+09	2.62596e+09	3.69828e+09	3.44107e+09	3.11037e+09	2.62144e+09	3.4901e+09	3.46564e+09	3.1029e+09	2.99437e+09	2.97873e+09	2.97211e+09
1049neg		PI(20:2_20:2)-H	PI(40:4)-H	PI	(20:2_20:2)	(20:2)	(20:2)			C49 H86 O13 N0 P1	913.581	382.68	0.00163065	0.690633	0.0634914	1.10042	3.41734e+07	4.02251e+07	2.54901e+07	4.62769e+07	4.60428e+07	4.18321e+07	2.02998e+07	2.21499e+07	1.66253e+07	5.41782e+07	6.92129e+07	4.63747e+07	1.67131e+07	3.44703e+07	3.13633e+07	3.48847e+07	4.46754e+07	3.83479e+07	1.99879e+07	4.01316e+07	4.17933e+07	2.70024e+07	2.5713e+07	4.29674e+07	1.87419e+07	1.88013e+07	1.87846e+07
104neg		CL(76:11)-2H	CL(76:11)-2H	CL	(76:11)	(76:11)				C85 H142 O17 P2	748.487	524.008	0.0312431	1.00863	0.931777	0.225377	8.95652e+06	6.20271e+06	7.60888e+06	4.4766e+06	5.44028e+06	7.67998e+06	2.2235e+06	6.7833e+06	6.31541e+06	5.70184e+06	6.47232e+06	4.83586e+06	7.21141e+06	4.01146e+06	4.02251e+06	5.78891e+06	7.27782e+06	6.40186e+06	5.50472e+06	6.38789e+06	5.49703e+06	4.47884e+06	5.29832e+06	6.83207e+06	5.31602e+06	5.03104e+06	5.04629e+06
1053pos		ChE(2:0)+H	ChE(2:0)+H	ChE	(2:0)	(2:0)				C29 H49 O2	429.373	459.001	0.0043723	0.950502	0.742265	0.437629	6.976e+07	5.30103e+07	4.92372e+07	5.65353e+07	5.22917e+07	5.98032e+07	1.26062e+08	4.51755e+07	4.7309e+07	6.91305e+07	5.03965e+07	4.64939e+07	2.92481e+07	4.60923e+07	8.5449e+07	6.63476e+07	6.84851e+07	5.07325e+07	4.58599e+07	6.39764e+07	7.09528e+07	7.3574e+07	4.07414e+07	6.0561e+07	4.91296e+07	4.95029e+07	4.91301e+07
1055pos		Co(Q10)+H	Co(Q10)+H	Co	(Q10)	(Q10)				C59 H91 O4	863.691	976.39	0.0070805	1.10941	0.60324	0.524868	7.00453e+08	4.43627e+08	5.5123e+08	4.07232e+08	4.61821e+08	3.30519e+08	1.65464e+08	7.03381e+08	5.96583e+08	4.67209e+08	4.53581e+08	4.45833e+08	6.8389e+08	3.84188e+08	2.80094e+08	5.27978e+08	5.9187e+08	6.62598e+08	6.73312e+08	4.39992e+08	2.78072e+08	2.49266e+08	5.53915e+08	5.40261e+08	4.36369e+08	4.41774e+08	4.36432e+08
1056neg		PS(22:0)-H	PS(22:0)-H	PS	(22:0)	(22:0)				C28 H53 O10 N1 P1	594.341	108.037	0.0995628	1.95386	0.22183	0.958408	1.43752e+07	6.59628e+06	1.31832e+07	9.96314e+06	4.43707e+06	6.48342e+06	1.48232e+07	3.52212e+06	1.91524e+06	1.37272e+07	1.60311e+07	1.0264e+07	2.76924e+07	1.5529e+07	2.02744e+07	1.47987e+07	1.1423e+07	3.93481e+07	7.94485e+06	6.0619e+06	1.36428e+07	7.45404e+06	4.96421e+06	6.75598e+06	3.76842e+06	3.76996e+06	4.45882e+06
1057neg		PS(22:1e)-H	PS(22:1e)-H	PS	(22:1e)	(22:1e)				C28 H53 O9 N1 P1	578.346	168.74	0.0182026	1.04824	0.901485	0.24446	3.43111e+06	3.84556e+06	2.87045e+06	5.01103e+06	3.61037e+06	3.95922e+06	6.16482e+06	2.79387e+06	1.00166e+06	7.05204e+06	2.79717e+06	7.00214e+06	2.26883e+06	5.15365e+06	5.21408e+06	5.17872e+06	3.24958e+06	2.45385e+06	1.61238e+06	4.58364e+06	1.16187e+07	5.88002e+06	3.37289e+06	2.16078e+06	2.61489e+06	2.53329e+06	2.61486e+06
1058pos		Co(Q6)+H	Co(Q6)+H	Co	(Q6)	(Q6)				C39 H59 O4	591.441	918.48	0.0396417	1.13773	0.407944	0.150607	7.48478e+07	5.36889e+07	4.77926e+07	4.98576e+07	4.50628e+07	4.14138e+07	2.23458e+07	7.09553e+07	6.52575e+07	5.18043e+07	5.99683e+07	4.94488e+07	7.58676e+07	4.78213e+07	3.80085e+07	5.69703e+07	7.03951e+07	7.81776e+07	7.76109e+07	4.55781e+07	4.05598e+07	4.70737e+07	5.03361e+07	4.76455e+07	5.01028e+07	5.04325e+07	5.37881e+07
1059neg		PS(16:1e_10:2)-H	PS(26:3e)-H	PS	(16:1e_10:2)	(16:1e)	(10:2)			C32 H57 O9 N1 P1	630.378	172.708	0.149273	0.574984	0.171952	0.867715	2.7212e+07	2.8943e+07	1.83624e+07	1.26878e+07	1.20788e+07	1.60051e+07	1.81927e+07	4.02779e+06	2.24831e+06	3.44121e+07	3.18226e+07	2.51812e+07	2.60254e+06	1.75619e+07	2.95449e+07	3.05531e+07	3.3691e+07	5.48447e+06	1.40485e+07	1.13487e+07	3.21348e+07	2.42669e+07	6.6159e+06	2.18705e+07	8.36945e+06	8.38385e+06	1.07466e+07
1059pos		Co(Q6)+H	Co(Q6)+H	Co	(Q6)	(Q6)				C39 H59 O4	591.441	980.061	0.0167182	1.13124	0.552217	0.0700328	9.03091e+06	5.50601e+06	5.9131e+06	4.48647e+06	5.14153e+06	4.58837e+06	1.02469e+06	9.24409e+06	7.42569e+06	7.18899e+06	4.54832e+06	5.49316e+06	8.70212e+06	4.44954e+06	4.05297e+06	7.05735e+06	7.03882e+06	8.21863e+06	8.26027e+06	4.5356e+06	3.14614e+06	3.25987e+06	8.35556e+06	7.32278e+06	5.1086e+06	5.25892e+06	5.11046e+06
105neg		CL(76:11)-H	CL(76:11)-H	CL	(76:11)	(76:11)				C85 H143 O17 P2	1497.98	959.04	0.0144827	0.81307	0.192046	1.17516	1.53073e+08	1.37944e+08	1.36071e+08	1.30946e+08	6.48353e+07	1.15626e+08	5.48806e+07	6.27779e+07	1.10447e+08	8.28367e+07	9.10134e+07	1.23087e+08	9.35887e+07	1.28181e+08	7.22826e+07	1.08597e+08	1.1424e+08	1.01961e+08	1.49669e+08	1.1886e+08	8.52527e+07	9.10645e+07	1.13363e+08	3.40908e+07	9.21744e+07	9.45368e+07	9.22356e+07
1061neg		PS(29:0)-H	PS(29:0)-H	PS	(29:0)	(29:0)				C35 H67 O10 N1 P1	692.451	707.997	0.0060053	0.855933	0.318015	0.435873	4.33852e+07	4.8163e+07	4.19474e+07	5.84985e+07	4.4783e+07	3.93322e+07	4.42385e+07	9.40332e+06	4.67984e+07	3.59973e+07	1.0283e+07	4.6538e+07	4.52244e+07	5.14975e+07	3.77509e+07	4.011e+07	4.59146e+07	4.28886e+07	4.73381e+07	4.03761e+07	4.33644e+07	3.9909e+07	4.35946e+07	4.83086e+07	4.56744e+07	4.5669e+07	4.61484e+07
1062neg		PS(32:0)-H	PS(32:0)-H	PS	(32:0)	(32:0)				C38 H73 O10 N1 P1	734.498	808.634	0.0321239	0.827525	0.2098	0.967342	6.25363e+07	5.94823e+07	6.08946e+07	4.9002e+07	5.99548e+07	5.48198e+07	2.20365e+07	1.89627e+07	6.5079e+07	5.86538e+07	1.1373e+07	5.82557e+07	6.73166e+07	5.722e+07	4.36348e+07	5.45783e+07	5.75654e+07	5.65925e+07	6.58204e+07	5.61902e+07	3.56299e+07	5.38962e+07	6.30175e+07	6.61638e+07	1.59707e+07	1.50776e+07	1.59251e+07
1064neg		PS(35:0)-H	PS(35:0)-H	PS	(35:0)	(35:0)				C41 H79 O10 N1 P1	776.545	901.615	0.0128279	0.929785	0.600963	0.204156	1.17682e+08	1.1803e+08	9.91374e+07	1.11984e+08	1.06325e+08	1.1661e+08	7.31211e+07	3.47745e+07	1.28259e+08	1.11084e+08	2.82285e+07	1.15376e+08	1.19734e+08	1.31744e+08	1.13515e+08	1.04635e+08	1.13022e+08	1.20207e+08	1.24176e+08	1.2442e+08	1.34296e+08	1.2213e+08	1.11898e+08	5.76497e+07	5.14216e+07	5.15058e+07	5.26134e+07
1067neg		PS(38:1)-H	PS(38:1)-H	PS	(38:1)	(38:1)				C44 H83 O10 N1 P1	816.576	700.5	0.00699853	1.71123	0.410298	0.582186	4.64775e+06	3.45445e+06	3.15336e+06	1.21975e+07	3.10782e+06	2.51625e+06	1.02385e+07	963758	3.29995e+06	2.82376e+06	2.0186e+06	3.65418e+06	1.78781e+07	4.13975e+06	3.92901e+06	3.29231e+06	5.50417e+06	3.07538e+06	3.00232e+06	5.91855e+06	4.28576e+06	2.94278e+06	2.61256e+06	2.397e+06	2.65141e+06	2.61943e+06	2.65148e+06
1069pos		Co(Q7)+H	Co(Q7)+H	Co	(Q7)	(Q7)				C44 H67 O4	659.503	762.54	0.0779281	2.68187	0.0754106	1.07325	4.25613e+08	1.18983e+07	1.49297e+08	4.88083e+08	1.53578e+08	4.46831e+07	6.18521e+08	2.01713e+08	1.05392e+08	7.57282e+07	5.36003e+08	2.06706e+07	1.64865e+07	1.39404e+08	3.2189e+08	1.15146e+07	3.03706e+08	2.12886e+08	7.78612e+07	1.87715e+08	1.89296e+08	3.56872e+08	5.37109e+07	1.64637e+08	1.46189e+08	1.67819e+08	1.67925e+08
106neg		CL(76:11)-H	CL(76:11)-H	CL	(76:11)	(76:11)				C85 H143 O17 P2	1497.98	990.603	0.0117205	0.848334	0.399781	0.423085	2.36007e+07	3.35878e+07	3.51454e+07	3.55378e+07	1.73649e+07	3.09869e+07	1.5905e+07	6.43684e+06	3.00538e+07	2.39468e+07	2.3876e+07	3.26795e+07	2.63366e+07	3.5335e+07	1.87854e+07	2.90129e+07	2.80164e+07	3.73255e+07	3.35177e+07	3.04407e+07	2.22401e+07	2.52796e+07	2.83656e+07	8.85944e+06	2.28949e+07	2.23681e+07	2.25799e+07
1072neg		PS(40:3)-H	PS(40:3)-H	PS	(40:3)	(40:3)				C46 H83 O10 N1 P1	840.576	585.347	0.0186265	1.10945	0.278683	0.9931	4.92672e+07	3.00217e+07	4.29459e+07	3.06387e+07	2.53723e+07	3.21605e+07	1.98334e+07	2.93726e+07	3.00291e+07	2.82691e+07	1.19966e+07	3.15715e+07	4.04665e+07	2.34606e+07	2.93571e+07	2.73495e+07	4.0265e+07	3.39569e+07	3.21775e+07	3.04387e+07	2.23428e+07	3.5913e+07	3.71744e+07	3.30136e+07	3.06922e+07	3.01131e+07	2.95701e+07
1072pos		Co(Q7)+H	Co(Q7)+H	Co	(Q7)	(Q7)				C44 H67 O4	659.503	921.12	0.022045	1.2471	0.19448	0.136335	6.1636e+07	4.04433e+07	4.15876e+07	4.21044e+07	2.96564e+07	3.30704e+07	1.70882e+07	7.01443e+07	5.11359e+07	4.09841e+07	4.32322e+07	4.1888e+07	5.42144e+07	3.75332e+07	3.19693e+07	4.49521e+07	6.14839e+07	6.27504e+07	5.45101e+07	4.21284e+07	2.92106e+07	4.22962e+07	4.13761e+07	4.12648e+07	4.17611e+07	4.18746e+07	4.34321e+07
1073neg		PS(18:4_22:2)-H	PS(40:6)-H	PS	(18:4_22:2)	(18:4)	(22:2)			C46 H77 O10 N1 P1	834.529	652.56	0.00646667	0.900069	0.326003	0.266852	5.20881e+07	5.09893e+07	5.30724e+07	6.12826e+07	5.53799e+07	5.03251e+07	5.54886e+07	2.42933e+07	5.42781e+07	5.55575e+07	1.88915e+07	5.36285e+07	5.03866e+07	5.81665e+07	5.25692e+07	5.49931e+07	5.28175e+07	4.63883e+07	4.88576e+07	5.16458e+07	5.97779e+07	5.31578e+07	4.92817e+07	4.97224e+07	5.763e+07	5.69882e+07	5.69904e+07
1080neg		PS(43:2)-H	PS(43:2)-H	PS	(43:2)	(43:2)				C49 H91 O10 N1 P1	884.639	730.38	0.0189949	1.00108	0.994619	0.146011	7.92101e+06	5.80576e+06	6.15806e+06	5.71567e+06	5.77707e+06	5.46687e+06	2.6947e+06	2.6153e+06	5.6276e+06	5.3666e+06	1.69665e+06	5.01645e+06	6.76568e+06	4.00727e+06	4.8894e+06	5.45625e+06	5.62626e+06	8.07537e+06	6.58921e+06	6.93387e+06	3.62062e+06	6.06603e+06	6.91581e+06	5.33537e+06	5.12468e+06	4.96009e+06	4.9593e+06
1080pos		Co(Q8)+H	Co(Q8)+H	Co	(Q8)	(Q8)				C49 H75 O4	727.566	835.448	0.0786206	1.342	0.162361	0.22379	1.0802e+08	5.97054e+07	5.76622e+07	1.21822e+08	5.20641e+07	5.86324e+07	5.55689e+07	1.08723e+08	9.21332e+07	5.73307e+07	6.33339e+07	5.19874e+07	5.30031e+07	5.81769e+07	5.9385e+07	5.37225e+07	7.59369e+07	1.19035e+08	1.07378e+08	5.64196e+07	5.63109e+07	1.07482e+08	7.49291e+07	1.26833e+08	4.98554e+07	5.7556e+07	5.70617e+07
1084neg		SQDG(40:2)+HCOO	SQDG(40:2)+HCOO	SQDG	(40:2)	(40:2)				C50 H91 O14 S1	947.614	111.217	0.0187237	0.99313	0.978365	0.120357	5.59112e+06	4.48295e+06	4.91348e+06	4.31392e+06	6.5109e+06	8.3037e+06	1.78997e+06	6.83951e+06	6.60759e+06	7.33228e+06	3.80891e+06	2.03389e+06	8.65167e+06	2.41622e+06	3.28425e+06	4.62883e+06	5.87366e+06	5.43723e+06	3.45982e+06	5.70624e+06	2.68296e+06	3.99635e+06	4.29513e+06	8.51976e+06	4.13794e+06	4.27486e+06	4.14041e+06
1085neg		SQDG(43:3)-H	SQDG(43:3)-H	SQDG	(43:3)	(43:3)				C52 H93 O12 S1	941.639	752.591	0.00221286	1.05393	0.780392	0.263414	7.03979e+06	6.0568e+06	6.00549e+06	8.19954e+06	6.20091e+06	5.53213e+06	9.79492e+06	2.39008e+06	5.90888e+06	6.34932e+06	2.58556e+06	4.98668e+06	6.18089e+06	7.41917e+06	9.51736e+06	5.61802e+06	7.06389e+06	6.62343e+06	6.613e+06	6.97634e+06	1.07712e+07	6.13335e+06	5.56733e+06	5.37104e+06	6.42335e+06	6.4233e+06	6.44798e+06
1086neg		SQDG(44:2)+HCOO	SQDG(44:2)+HCOO	SQDG	(44:2)	(44:2)				C54 H99 O14 S1	1003.68	154.023	0.00598001	1.05562	0.767006	0.408475	1.55622e+07	2.12689e+07	1.36516e+07	1.60302e+07	1.79187e+07	2.42872e+07	3.51091e+06	2.02601e+07	2.03453e+07	1.77561e+07	8.10182e+06	8.38921e+06	2.24819e+07	9.46632e+06	7.7617e+06	1.4745e+07	1.56231e+07	2.36127e+07	1.57749e+07	2.12487e+07	7.98885e+06	1.66006e+07	2.03133e+07	2.92153e+07	1.43609e+07	1.451e+07	1.43606e+07
1087neg		ST(t32:0+O)+HCOO	ST(t32:0+O)+HCOO	ST	(t32:0+O)	(t32:0+O)				C39 H76 O15 N1 S1	830.494	565.554	0.0624328	1.07181	0.597494	0.463291	2.11626e+07	1.12022e+07	2.26757e+07	1.92946e+07	1.5877e+07	1.78643e+07	1.9378e+07	1.51344e+07	1.40427e+07	1.08698e+07	7.44727e+06	1.28543e+07	1.6187e+07	1.72514e+07	1.81233e+07	2.01909e+07	2.22853e+07	1.35225e+07	9.68541e+06	1.28086e+07	1.61263e+07	1.42191e+07	8.78993e+06	9.92355e+06	1.86086e+07	1.86286e+07	1.66754e+07
1090pos		Co(Q9)+H	Co(Q9)+H	Co	(Q9)	(Q9)				C54 H83 O4	795.629	922.08	0.0175733	1.17931	0.296761	1.46059	5.07177e+09	3.49812e+09	3.73886e+09	3.66985e+09	3.03405e+09	2.96884e+09	1.7181e+09	5.22404e+09	4.5769e+09	3.64432e+09	3.85501e+09	3.58385e+09	5.60841e+09	3.3267e+09	2.79219e+09	3.61703e+09	5.07406e+09	5.26381e+09	5.65221e+09	3.72144e+09	2.83547e+09	3.79421e+09	3.66876e+09	3.69749e+09	3.59785e+09	3.71833e+09	3.62035e+09
1111pos		DG(18:4e)+Na	DG(18:4e)+Na	DG	(18:4e)	(18:4e)				C21 H34 O4 Na1	373.235	918.444	0.0187336	1.26093	0.21096	0.125963	6.44261e+07	3.98073e+07	4.28521e+07	4.04459e+07	2.54435e+07	2.9544e+07	1.80434e+07	6.71478e+07	5.39805e+07	4.04076e+07	4.3212e+07	3.68859e+07	5.06958e+07	3.62144e+07	2.84252e+07	3.70305e+07	5.5389e+07	6.13937e+07	5.52275e+07	3.46433e+07	2.74429e+07	4.04422e+07	3.95069e+07	4.06787e+07	3.98521e+07	4.05576e+07	4.13718e+07
1112pos		DG(8:0_11:2)+NH4	DG(19:2)+NH4	DG	(8:0_11:2)	(8:0)	(11:2)			C22 H42 O5 N1	400.306	83.878	0.0012727	1.26775	0.340816	0.179781	3.51847e+07	1.25014e+07	5.07859e+07	6.05036e+07	5.69407e+07	5.70052e+07	6.49714e+07	5.11153e+07	6.61518e+07	6.23387e+07	6.35932e+07	1.82204e+07	2.12554e+07	7.29676e+07	3.09454e+07	5.82479e+07	5.09363e+07	6.64532e+07	5.71223e+07	8.11695e+07	7.17947e+07	6.24423e+07	6.17882e+07	6.26608e+07	5.66887e+07	5.66886e+07	5.65637e+07
1113pos		DG(19:2)+H	DG(19:2)+H	DG	(8:0_11:2)	(8:0)	(11:2)			C22 H39 O5	383.279	83.878	0.0157199	1.19052	0.511126	0.0856517	1.17671e+07	3.66895e+06	1.35073e+07	1.93965e+07	1.87815e+07	1.96621e+07	2.05304e+07	1.43251e+07	1.83209e+07	1.82413e+07	2.13265e+07	5.86943e+06	5.45206e+06	2.34264e+07	9.4539e+06	1.48472e+07	1.82039e+07	2.06691e+07	2.00223e+07	2.24086e+07	2.28423e+07	1.89975e+07	2.03914e+07	2.25203e+07	1.87626e+07	1.87584e+07	1.9276e+07
1119pos		DG(19:4e)+Na	DG(19:4e)+Na	DG	(19:4e)	(19:4e)				C22 H36 O4 Na1	387.251	916.8	0.0133876	1.18756	0.320857	0.127966	3.76684e+07	2.34621e+07	2.13575e+07	2.79536e+07	1.62505e+07	1.82755e+07	1.18742e+07	3.56418e+07	3.93075e+07	2.76868e+07	3.07634e+07	2.92175e+07	3.67021e+07	1.98321e+07	1.79975e+07	2.52782e+07	3.82073e+07	3.7711e+07	3.80329e+07	2.23804e+07	1.75137e+07	2.78531e+07	2.61857e+07	2.6071e+07	2.57391e+07	2.57647e+07	2.63533e+07
1121pos		DG(20:1)+NH4	DG(20:1)+NH4	DG	(20:1)	(20:1)				C23 H46 O5 N1	416.337	85.3335	0.0165395	3.33945	0.0592186	0.832447	4.70865e+07	6.23443e+06	2.96343e+08	6.80823e+07	2.81486e+07	7.5032e+07	1.053e+08	5.23916e+07	5.23478e+07	7.73618e+06	7.72273e+07	7.64717e+06	2.47113e+07	3.98644e+07	4.45333e+07	4.41026e+07	1.2654e+08	1.62092e+08	3.03877e+07	9.54116e+07	7.68916e+07	1.70189e+08	3.19605e+07	6.16377e+07	6.92318e+07	6.923e+07	6.72664e+07
112neg		CL(76:13)-H	CL(76:13)-H	CL	(76:13)	(76:13)				C85 H139 O17 P2	1493.95	935.012	0.00615372	1.02757	0.866765	0.175344	4.30957e+06	5.72704e+06	4.45549e+06	5.54792e+06	2.37191e+06	5.92716e+06	2.16805e+06	2.8749e+06	6.00375e+06	4.72579e+06	1.57035e+06	6.10443e+06	6.29197e+06	4.98288e+06	3.02629e+06	5.46633e+06	3.80611e+06	6.04254e+06	5.88677e+06	5.55386e+06	4.19958e+06	5.92824e+06	6.25354e+06	1.40937e+06	4.79041e+06	4.73977e+06	4.73965e+06
1130pos		DG(20:2)+NH4	DG(20:2)+NH4	DG	(20:2)	(20:2)				C23 H44 O5 N1	414.321	17.1	0.197951	2.02798	0.142006	0.0202431	97944.9	22120.1	207855	32428	18082.9	40168.5	97044.8	116663	11149.6	67522.9	87752.7	24504.6	29273.5	74181.2	37499.8	23677.1	47579.2	13090.9	99614.7	27333.9	88171.8	117402	187038	83552.5	700253	500789	509090
1131pos		DG(20:2)+NH4	DG(20:2)+NH4	DG	(20:2)	(20:2)				C23 H44 O5 N1	414.321	63.218	0.00523245	3.40931	0.0858373	0.59925	4.41269e+07	2.89361e+06	1.5886e+08	4.07411e+07	1.45835e+07	3.83885e+07	4.17823e+07	3.73861e+07	5.39732e+07	4.007e+06	4.28101e+07	2.67362e+06	1.22456e+07	2.18615e+07	1.87944e+07	4.07304e+07	6.72885e+07	1.0248e+08	2.08748e+07	4.59271e+07	1.83643e+07	9.49218e+07	1.90108e+07	5.15769e+07	3.23132e+07	3.23099e+07	3.20196e+07
113neg		CL(76:14)-H	CL(76:14)-H	CL	(76:14)	(76:14)				C85 H137 O17 P2	1491.93	921.084	0.0229459	0.679262	0.0623073	0.232796	3.27885e+06	1.037e+06	3.068e+06	1.33552e+06	1.63365e+06	901115	954701	619626	1.12356e+06	877559	1.3609e+06	1.15823e+06	1.29374e+06	1.02847e+06	1.66525e+06	1.33898e+06	2.67587e+06	906168	1.69493e+06	1.28858e+06	533724	677613	929431	396440	1.19142e+06	1.14525e+06	1.14534e+06
113pos		AcCa(22:3)+H	AcCa(22:3)+H	AcCa	(22:3)	(22:3)				C29 H52 O4 N1	478.389	133.11	0.0310589	1.12911	0.741058	0.12737	8.94537e+06	7.44239e+06	1.57018e+06	1.42082e+07	1.8129e+07	2.47621e+07	3.6536e+06	4.05222e+07	1.41219e+07	3.55145e+07	1.13297e+07	1.37686e+07	7.80388e+06	1.2513e+07	2.98483e+06	2.82746e+07	6.99698e+06	4.525e+07	3.87696e+07	2.40519e+07	1.02255e+07	4.00714e+07	1.23797e+07	2.4615e+07	1.61013e+07	1.60865e+07	1.52434e+07
1141pos		DG(10:0e_10:4)+NH4	DG(20:4e)+NH4	DG	(10:0e_10:4)	(10:0e)	(10:4)			C23 H42 O4 N1	396.311	74.5774	0.00502118	2.50795	0.117205	0.424811	4.73211e+07	1.46267e+06	8.84556e+07	3.50092e+07	2.1122e+07	3.53678e+07	3.51343e+07	4.82582e+07	5.96165e+07	3.99973e+06	4.92567e+07	3.58797e+06	8.81303e+06	2.57006e+07	1.50732e+07	2.31527e+07	5.89507e+07	6.766e+07	1.73942e+07	3.58718e+07	1.41318e+07	5.89205e+07	1.02118e+07	7.62855e+07	3.3137e+07	3.29989e+07	3.28072e+07
1144pos		DG(20:5e)+Na	DG(20:5e)+Na	DG	(20:5e)	(20:5e)				C23 H36 O4 Na1	399.251	934.26	0.0234094	1.15165	0.379239	0.144087	1.09187e+08	8.06044e+07	7.98039e+07	7.45565e+07	7.34093e+07	5.89405e+07	3.71932e+07	1.28079e+08	1.04132e+08	8.20707e+07	9.82713e+07	7.97787e+07	1.13071e+08	7.1214e+07	5.94858e+07	7.79727e+07	1.05817e+08	1.12035e+08	1.23531e+08	7.44803e+07	6.23129e+07	8.21021e+07	7.63077e+07	8.08223e+07	8.04612e+07	8.38219e+07	8.38065e+07
114neg		CL(76:6)-H	CL(76:6)-H	CL	(76:6)	(76:6)				C85 H153 O17 P2	1508.06	1028.45	0.0254632	1.03605	0.806186	0.0997379	1.44864e+06	1.6821e+06	1.87504e+06	2.45038e+06	764122	2.03953e+06	308821	1.92049e+06	1.75921e+06	1.72104e+06	954377	1.76837e+06	2.03857e+06	1.49822e+06	1.25226e+06	1.64883e+06	1.91137e+06	1.76657e+06	1.69308e+06	1.42418e+06	1.01265e+06	1.67878e+06	1.5997e+06	679326	1.07773e+06	1.12667e+06	1.07909e+06
1151pos		DG(22:1)+NH4	DG(22:1)+NH4	DG	(22:1)	(22:1)				C25 H50 O5 N1	444.368	112.02	0.124537	2.96535	0.0389293	0.808665	1.91987e+07	1.0127e+07	7.51025e+07	4.60729e+07	2.88418e+07	4.52025e+07	4.8393e+07	4.7074e+07	3.66344e+07	7.29884e+06	4.6901e+07	8.73073e+06	2.54791e+07	2.90778e+07	1.75687e+07	4.58155e+07	5.81381e+07	1.42268e+08	5.28109e+07	6.36071e+07	5.58244e+07	1.28246e+08	5.4842e+07	3.6559e+07	3.79193e+07	3.77725e+07	3.0231e+07
1154pos		DG(22:2)+NH4	DG(22:2)+NH4	DG	(22:2)	(22:2)				C25 H48 O5 N1	442.353	75.42	0.00506026	3.53638	0.0950608	1.66868	3.54298e+08	3.63414e+07	9.31518e+08	1.76219e+08	9.44651e+07	2.56326e+08	1.48023e+08	2.05825e+08	2.31896e+08	2.56012e+07	1.56925e+08	2.61825e+07	1.20119e+08	1.13695e+08	9.56293e+07	2.75147e+08	3.07894e+08	9.10516e+08	1.64741e+08	3.39974e+08	1.27557e+08	5.99365e+08	1.71384e+08	3.00017e+08	2.39962e+08	2.42073e+08	2.42082e+08
1159pos		DG(22:3)+NH4	DG(22:3)+NH4	DG	(22:3)	(22:3)				C25 H46 O5 N1	440.337	75.7773	0.0103693	1.60048	0.410594	0.232347	3.98484e+07	9.47738e+06	1.92806e+08	2.96189e+07	3.99427e+07	8.54404e+07	2.83639e+07	3.05331e+07	3.57578e+07	1.06591e+07	5.06688e+07	6.93146e+06	1.27405e+07	2.01519e+07	1.64446e+07	3.27058e+07	1.39348e+08	8.66766e+07	3.71389e+07	6.29775e+07	1.78517e+07	1.24823e+08	3.08106e+07	3.4416e+07	4.22418e+07	4.30119e+07	4.30074e+07
115neg		CL(76:9)-H	CL(76:9)-H	CL	(76:9)	(76:9)				C85 H147 O17 P2	1502.01	995.414	0.0106125	0.95688	0.767766	0.178059	9.71781e+06	1.61721e+07	1.2857e+07	3.35221e+07	7.18926e+06	1.50118e+07	1.37688e+07	7.17199e+06	1.38515e+07	9.03356e+06	1.25411e+07	1.34101e+07	1.17539e+07	1.86015e+07	1.10592e+07	1.17016e+07	1.95156e+07	1.37631e+07	1.42473e+07	1.52138e+07	1.39114e+07	1.27547e+07	1.24722e+07	4.31301e+06	1.20909e+07	1.18709e+07	1.20926e+07
1165pos		DG(22:5e)+Na	DG(22:5e)+Na	DG	(22:5e)	(22:5e)				C25 H40 O4 Na1	427.282	912.48	0.107883	1.13889	0.501424	0.0638469	2.08147e+07	1.57366e+07	1.32247e+07	1.7923e+07	1.04653e+07	9.85515e+06	5.65201e+06	2.2992e+07	2.09648e+07	1.55984e+07	1.96085e+07	1.62225e+07	2.11166e+07	1.17249e+07	1.12534e+07	1.20685e+07	2.1028e+07	2.26651e+07	2.35654e+07	1.49326e+07	1.04494e+07	1.43947e+07	1.25259e+07	1.45869e+07	1.61704e+07	1.61898e+07	1.94043e+07
1166pos		DG(23:1)+H	DG(23:1)+H	DG	(23:1)	(23:1)				C26 H49 O5	441.357	310.931	0.0134446	1.9151	0.0727348	0.198126	1.87991e+07	1.97068e+06	3.22283e+06	8.01458e+06	4.80046e+06	5.78151e+06	4.81949e+06	5.46858e+06	4.07359e+06	6.44433e+06	4.93197e+06	1.23404e+06	3.90418e+06	6.18206e+06	3.80141e+06	5.44961e+06	3.48707e+06	1.57515e+07	4.56847e+06	8.53503e+06	6.73162e+06	7.97026e+06	7.66734e+06	1.13113e+07	5.97588e+06	6.11746e+06	6.117e+06
1169pos		DG(23:5e)+Na	DG(23:5e)+Na	DG	(23:5e)	(23:5e)				C26 H42 O4 Na1	441.298	916.654	0.0227519	1.1611	0.341723	0.171701	8.75516e+07	6.74226e+07	6.49016e+07	6.60882e+07	5.04172e+07	4.67882e+07	2.73868e+07	8.73554e+07	8.98175e+07	6.64369e+07	7.5475e+07	6.56586e+07	8.90156e+07	5.74049e+07	4.62955e+07	6.25085e+07	9.15189e+07	9.79787e+07	9.74372e+07	6.37279e+07	4.65561e+07	7.01479e+07	6.66071e+07	6.77239e+07	6.42442e+07	6.68615e+07	6.68265e+07
116neg		CL(78:11)-H	CL(78:11)-H	CL	(78:11)	(78:11)				C87 H147 O17 P2	1526.01	984.576	0.00979798	0.865516	0.384388	0.227849	8.38507e+06	1.00782e+07	1.10026e+07	1.60672e+07	5.09665e+06	9.84178e+06	6.20833e+06	4.31113e+06	8.49202e+06	5.30234e+06	7.85313e+06	8.70019e+06	6.8098e+06	1.19708e+07	6.51201e+06	7.56575e+06	1.25968e+07	8.27069e+06	1.11898e+07	8.7489e+06	8.58141e+06	7.23443e+06	8.24916e+06	2.50178e+06	7.49716e+06	7.40257e+06	7.35428e+06
1172pos		DG(24:1)+NH4	DG(24:1)+NH4	DG	(24:1)	(24:1)				C27 H54 O5 N1	472.4	156.298	0.020128	3.28251	0.0671297	0.553061	4.55067e+06	1.30021e+07	1.14693e+07	6.26866e+06	7.90574e+06	2.00689e+07	8.28277e+06	1.64163e+07	5.40915e+06	4.20986e+06	1.87758e+07	3.54475e+06	1.329e+07	5.1614e+06	6.75996e+06	2.38072e+07	6.27595e+06	8.3466e+07	1.91381e+07	2.61076e+07	1.44707e+07	6.49491e+07	3.01901e+07	8.0135e+06	1.6393e+07	1.6959e+07	1.63701e+07
1177pos		DG(24:2)+NH4	DG(24:2)+NH4	DG	(24:2)	(24:2)				C27 H52 O5 N1	470.384	129.06	0.00109808	3.58535	0.0902572	1.39717	9.80783e+07	2.83591e+07	1.44562e+08	6.36301e+07	5.07444e+07	1.2435e+08	6.50697e+07	8.96911e+07	5.4243e+07	2.97767e+07	1.03657e+08	1.61081e+07	9.18288e+07	6.09891e+07	5.6191e+07	2.20624e+08	7.61091e+07	5.73826e+08	1.31622e+08	1.87446e+08	5.87118e+07	3.90564e+08	1.61257e+08	1.06042e+08	1.10657e+08	1.10887e+08	1.10704e+08
117neg		CL(78:12)-H	CL(78:12)-H	CL	(78:12)	(78:12)				C87 H145 O17 P2	1524	993.662	0.0116872	0.933125	0.710436	0.118935	1.36801e+06	2.34713e+06	1.72216e+06	5.69948e+06	918173	1.47718e+06	4.24019e+06	999963	1.6022e+06	1.17239e+06	2.52989e+06	1.69289e+06	1.25092e+06	2.56543e+06	1.56534e+06	1.60149e+06	2.57068e+06	1.75179e+06	1.87542e+06	2.0499e+06	2.23758e+06	1.28197e+06	1.32676e+06	660179	1.84475e+06	1.80772e+06	1.84487e+06
1180pos		DG(24:3)+NH4	DG(24:3)+NH4	DG	(24:3)	(24:3)				C27 H50 O5 N1	468.368	91.9899	0.0274064	2.76069	0.192199	0.884318	6.15708e+07	2.52261e+07	8.218e+07	3.87422e+07	6.39056e+07	1.32899e+08	2.66134e+07	5.33204e+07	1.78109e+07	5.16675e+06	4.44266e+07	1.46855e+07	3.99178e+07	2.4921e+07	1.80258e+07	1.11113e+08	4.8808e+07	3.5318e+08	9.03782e+07	1.31298e+08	2.78354e+07	3.72466e+08	7.05509e+07	4.86964e+07	7.32237e+07	7.68048e+07	7.68216e+07
1186pos		DG(24:5e)+NH4	DG(24:5e)+NH4	DG	(24:5e)	(24:5e)				C27 H48 O4 N1	450.358	100.92	0.042087	2.44562	0.15207	0.587512	3.10319e+07	7.80217e+06	3.28467e+07	3.57313e+07	2.00547e+07	7.96363e+07	1.38412e+07	6.37267e+07	1.84268e+07	5.23193e+06	3.44102e+07	1.36771e+07	2.32649e+07	1.03805e+07	4.69799e+06	5.1674e+07	1.81045e+07	1.50982e+08	5.34669e+07	6.51686e+07	1.7366e+07	1.49165e+08	3.53871e+07	5.89726e+07	3.22015e+07	3.46582e+07	3.46794e+07
1187pos		DG(12:1e_12:4)+Na	DG(24:5e)+Na	DG	(12:1e_12:4)	(12:1e)	(12:4)			C27 H44 O4 Na1	455.313	918.72	0.0251481	1.21746	0.177807	0.220101	9.06933e+07	5.8073e+07	6.06917e+07	6.10009e+07	4.5879e+07	4.83316e+07	2.84939e+07	8.8625e+07	7.40814e+07	6.14853e+07	6.55932e+07	6.4282e+07	8.78151e+07	5.31894e+07	4.73e+07	5.91567e+07	8.37703e+07	8.58562e+07	8.28953e+07	6.92537e+07	4.47567e+07	7.06913e+07	6.16921e+07	6.58569e+07	5.92152e+07	5.95644e+07	6.1997e+07
1188pos		DG(24:5e)+Na	DG(24:5e)+Na	DG	(24:5e)	(24:5e)				C27 H44 O4 Na1	455.313	982.44	0.0113788	1.07745	0.700656	0.0748151	1.07584e+07	8.0967e+06	9.42942e+06	7.02325e+06	7.12299e+06	5.91416e+06	2.39062e+06	1.23518e+07	1.05956e+07	8.58139e+06	7.27818e+06	8.29376e+06	1.15633e+07	5.75772e+06	5.31664e+06	9.11291e+06	8.5969e+06	1.10363e+07	1.1142e+07	7.23977e+06	5.05995e+06	4.0365e+06	8.91009e+06	8.68827e+06	7.76402e+06	7.81436e+06	7.64299e+06
1192pos		DG(26:2)+NH4	DG(26:2)+NH4	DG	(26:2)	(26:2)				C29 H56 O5 N1	498.415	161.458	0.0186002	3.66681	0.105892	0.390437	2.26187e+06	1.45824e+07	3.32008e+06	2.49911e+06	2.91855e+06	7.96757e+06	5.99956e+06	9.09684e+06	1.37791e+06	4.28428e+06	8.37615e+06	1.20998e+06	5.96561e+06	1.1081e+06	3.07985e+06	9.75106e+06	2.06814e+06	5.8126e+07	4.07555e+06	1.09715e+07	4.04818e+06	3.30996e+07	1.81426e+07	4.33303e+06	8.22242e+06	8.21319e+06	7.95599e+06
1193pos		DG(26:3)+NH4	DG(26:3)+NH4	DG	(26:3)	(26:3)				C29 H54 O5 N1	496.4	129.712	0.0139228	4.17089	0.135964	0.447422	1.80771e+06	8.56811e+06	2.58208e+06	2.90645e+06	3.57285e+06	8.53357e+06	6.19005e+06	4.65111e+06	2.95772e+06	3.39958e+06	9.80743e+06	1.15064e+06	2.10306e+06	2.1449e+06	1.91604e+06	1.3888e+07	3.24484e+06	6.08838e+07	1.37034e+07	1.67843e+07	5.4622e+06	7.07916e+07	1.8473e+07	3.15265e+06	1.00991e+07	1.00956e+07	9.85581e+06
1194pos		DG(14:1_12:2)+H	DG(26:3)+H	DG	(14:1_12:2)	(14:1)	(12:2)			C29 H51 O5	479.373	297.91	0.00888197	1.42885	0.43546	0.0537483	1.95764e+06	693803	1.24682e+06	1.49625e+06	1.81628e+06	1.25263e+06	1.24525e+07	1.77618e+06	1.08518e+06	3.31289e+06	1.23929e+06	620684	476368	2.00311e+06	2.25045e+06	1.93531e+06	2.71011e+06	1.12236e+06	1.25307e+06	1.89342e+06	4.98655e+06	3.11203e+06	1.31379e+06	1.06124e+06	1.80944e+06	1.83747e+06	1.83765e+06
119neg		CL(78:13)-H	CL(78:13)-H	CL	(78:13)	(78:13)				C87 H143 O17 P2	1521.98	971.225	0.00610308	0.946858	0.711389	0.193646	3.29076e+06	5.16621e+06	4.89569e+06	9.26818e+06	2.60624e+06	3.75949e+06	6.22684e+06	2.77707e+06	4.59695e+06	3.20147e+06	3.92054e+06	3.92366e+06	3.52254e+06	6.22618e+06	3.62552e+06	3.92169e+06	5.66478e+06	4.03292e+06	5.25485e+06	4.18035e+06	5.32984e+06	3.47323e+06	3.5056e+06	1.12862e+06	4.3451e+06	4.34493e+06	4.39111e+06
1201pos		DG(26:4e)+H	DG(26:4e)+H	DG	(26:4e)	(26:4e)				C29 H51 O4	463.378	329.077	0.0154546	1.58564	0.307384	0.077412	1.66218e+06	638071	1.61425e+06	2.54412e+06	2.37858e+06	1.67175e+06	2.69853e+07	2.44668e+06	1.27559e+06	3.29147e+06	1.97258e+06	661327	651675	2.15587e+06	3.66387e+06	2.12914e+06	3.84071e+06	1.59719e+06	1.42935e+06	2.16505e+06	6.32262e+06	3.21427e+06	1.7358e+06	1.54033e+06	2.74079e+06	2.81498e+06	2.74111e+06
1204pos		DG(26:6e)+NH4	DG(26:6e)+NH4	DG	(26:6e)	(26:6e)				C29 H50 O4 N1	476.373	108.9	0.0169735	1.12994	0.818895	0.089825	4.86167e+06	1.81121e+06	1.49718e+06	5.14969e+06	7.36429e+06	4.37952e+06	1.42474e+06	1.92403e+07	8.77736e+06	7.10224e+06	2.35557e+06	1.73927e+06	2.9149e+06	4.22957e+06	361516	5.12034e+06	3.19914e+06	8.51384e+06	2.3392e+07	5.55168e+06	2.44158e+06	6.0393e+06	1.25885e+07	1.94736e+07	6.13548e+06	5.95937e+06	5.95777e+06
1205pos		DG(26:6e)+Na	DG(26:6e)+Na	DG	(26:6e)	(26:6e)				C29 H46 O4 Na1	481.329	924.126	0.0337552	1.21325	0.181678	0.103901	3.08088e+07	1.96149e+07	2.23435e+07	2.20633e+07	1.83884e+07	1.56878e+07	8.67432e+06	2.60586e+07	2.74187e+07	1.83128e+07	2.14767e+07	2.0464e+07	2.72151e+07	1.62755e+07	1.58953e+07	2.02678e+07	2.72e+07	3.38494e+07	2.78582e+07	1.94661e+07	1.68329e+07	2.1066e+07	2.09635e+07	2.06677e+07	1.88234e+07	1.99678e+07	1.99692e+07
1207pos		DG(27:5e)+H	DG(27:5e)+H	DG	(27:5e)	(27:5e)				C30 H51 O4	475.378	438.403	0.0815273	1.13406	0.712258	0.0343249	855551	629639	1.22582e+06	2.89622e+06	1.2892e+06	1.18252e+06	1.09715e+07	1.1421e+06	493740	1.84193e+06	2.03395e+06	878463	185552	1.49736e+06	800865	2.06649e+06	2.24827e+06	1.03106e+06	964060	1.75296e+06	2.2267e+06	2.44574e+06	664396	1.34331e+06	1.19266e+06	1.25165e+06	1.06507e+06
1208pos		DG(27:6e)+Na	DG(27:6e)+Na	DG	(27:6e)	(27:6e)				C30 H48 O4 Na1	495.344	920.34	0.0474582	1.2529	0.186986	0.129645	2.73324e+07	2.20965e+07	2.02156e+07	1.94474e+07	1.25333e+07	1.63111e+07	5.38057e+06	2.77215e+07	2.5327e+07	1.69041e+07	1.80416e+07	1.79903e+07	2.99617e+07	1.68344e+07	1.82708e+07	1.82276e+07	2.2898e+07	2.96584e+07	2.73817e+07	2.01906e+07	1.42046e+07	2.02767e+07	2.00266e+07	1.81232e+07	1.78852e+07	1.94872e+07	1.80676e+07
1212pos		DG(28:3e)+NH4	DG(28:3e)+NH4	DG	(28:3e)	(28:3e)				C31 H60 O4 N1	510.452	346.659	0.0232982	1.57322	0.270611	0.163744	8.15605e+06	3.55948e+06	7.43073e+06	5.73578e+06	8.45187e+06	1.29736e+07	7.57917e+06	1.33142e+07	9.11038e+06	1.6505e+07	8.5741e+06	1.62045e+06	9.30005e+06	8.76007e+06	2.51893e+06	1.30188e+07	5.31564e+06	3.13322e+07	1.10265e+07	7.57585e+06	6.29344e+06	1.70852e+07	7.84418e+06	1.92622e+07	8.9014e+06	9.26582e+06	8.90201e+06
1217pos		DG(28:4e)+NH4	DG(28:4e)+NH4	DG	(28:4e)	(28:4e)				C31 H58 O4 N1	508.436	322.267	0.0104778	1.87686	0.207226	0.0774328	1.7596e+06	412460	733259	1.61899e+06	1.30629e+06	840765	1.72691e+07	1.33858e+06	879708	2.23736e+06	1.27217e+06	346856	346877	1.42961e+06	2.46067e+06	1.50628e+06	2.42881e+06	1.56286e+06	595663	1.56157e+06	4.18565e+06	2.34923e+06	988854	958826	1.74735e+06	1.77949e+06	1.77942e+06
1218pos		DG(28:4e)+NH4	DG(28:4e)+NH4	DG	(28:4e)	(28:4e)				C31 H58 O4 N1	508.436	417.129	0.0206205	1.09024	0.85983	0.0271237	827308	420293	547524	525348	973805	678928	6.27356e+06	374195	264157	1.43805e+06	636483	322005	152520	806714	1.73957e+06	972638	915070	398515	360139	796101	1.9859e+06	1.33808e+06	322392	751539	589115	610472	610860
1219pos		DG(28:5e)+NH4	DG(28:5e)+NH4	DG	(28:5e)	(28:5e)				C31 H56 O4 N1	506.42	181.965	0.0266261	1.22175	0.690724	0.0158604	787286	4.46453e+06	342534	2.09101e+06	1.69514e+06	3.62886e+06	1.36733e+06	6.6606e+06	986422	1.76148e+07	3.20008e+06	1.80195e+06	1.26397e+06	1.20687e+06	671099	4.62189e+06	921515	1.58191e+07	1.05322e+07	3.8282e+06	2.06287e+06	1.46992e+07	8.04345e+06	2.06594e+06	4.44942e+06	4.67428e+06	4.64479e+06
121neg		CL(78:14)-H	CL(78:14)-H	CL	(78:14)	(78:14)				C87 H141 O17 P2	1519.96	949.743	0.0169732	0.957014	0.789352	0.249277	9.97884e+06	8.84741e+06	1.01748e+07	1.20451e+07	4.86929e+06	8.08566e+06	9.37342e+06	4.54998e+06	8.26527e+06	7.05844e+06	7.38999e+06	8.91101e+06	6.57026e+06	1.133e+07	7.60427e+06	8.04114e+06	8.4778e+06	7.6495e+06	1.01499e+07	9.04902e+06	1.2012e+07	7.1738e+06	7.90613e+06	2.0392e+06	8.55179e+06	8.80891e+06	8.55816e+06
1220pos		DG(28:6e)+NH4	DG(28:6e)+NH4	DG	(28:6e)	(28:6e)				C31 H54 O4 N1	504.405	139.303	0.0231108	0.870381	0.830733	0.114708	1.4005e+06	1.88983e+06	396200	2.43066e+06	1.87429e+06	1.84001e+06	1.90891e+06	1.21327e+07	2.98004e+06	1.37266e+07	4.03389e+06	984539	1.6898e+06	3.23275e+06	521165	5.95999e+06	1.63816e+06	9.95985e+06	2.40722e+07	2.11961e+06	1.40014e+06	2.91422e+06	1.05373e+07	6.56067e+06	4.39821e+06	4.57732e+06	4.39952e+06
1221pos		DG(28:6e)+Na	DG(28:6e)+Na	DG	(28:6e)	(28:6e)				C31 H50 O4 Na1	509.36	918.518	0.0151529	1.17159	0.346975	0.197264	9.4984e+07	6.30916e+07	6.31944e+07	6.40029e+07	5.07099e+07	5.06338e+07	2.84226e+07	9.6567e+07	8.5374e+07	6.77178e+07	6.74643e+07	6.1587e+07	1.00106e+08	5.64207e+07	4.94951e+07	5.9002e+07	8.80628e+07	8.92281e+07	9.40081e+07	6.03453e+07	4.71376e+07	5.68008e+07	6.44427e+07	7.03402e+07	6.10337e+07	6.22861e+07	6.28752e+07
1223pos		DG(28:7e)+H	DG(28:7e)+H	DG	(28:7e)	(28:7e)				C31 H49 O4	485.363	415.389	0.0172493	1.35836	0.29171	0.0411126	1.33427e+06	784254	1.1705e+06	1.87275e+06	2.32599e+06	1.67682e+06	7.08494e+06	1.97763e+06	1.1253e+06	2.35407e+06	1.28086e+06	686063	785974	2.43181e+06	1.44661e+06	2.11445e+06	1.78636e+06	1.59122e+06	1.17295e+06	2.12289e+06	3.16209e+06	3.07446e+06	1.63402e+06	2.52136e+06	1.63679e+06	1.6865e+06	1.63741e+06
1224pos		DG(28:7e)+Na	DG(28:7e)+Na	DG	(28:7e)	(28:7e)				C31 H48 O4 Na1	507.344	919.095	0.0158263	1.17288	0.368121	0.101874	4.07497e+07	2.6628e+07	2.22789e+07	2.68576e+07	1.559e+07	1.76201e+07	1.20314e+07	3.77457e+07	3.79128e+07	2.73304e+07	3.00767e+07	2.77706e+07	3.36964e+07	1.96948e+07	1.98662e+07	2.56598e+07	3.60225e+07	3.66436e+07	3.90996e+07	2.72729e+07	1.63883e+07	2.82885e+07	2.79056e+07	2.79366e+07	2.71572e+07	2.78971e+07	2.79326e+07
1227pos		DG(29:6e)+Na	DG(29:6e)+Na	DG	(29:6e)	(29:6e)				C32 H52 O4 Na1	523.376	918.288	0.0297105	1.0892	0.563465	0.180927	8.15361e+07	5.41667e+07	5.24657e+07	5.38601e+07	4.52995e+07	4.18408e+07	2.2233e+07	7.64045e+07	6.9898e+07	5.62138e+07	6.26421e+07	5.39125e+07	7.11912e+07	4.48749e+07	4.16393e+07	5.10835e+07	6.68641e+07	7.19198e+07	7.82515e+07	5.21178e+07	3.7363e+07	5.15894e+07	5.06238e+07	5.58237e+07	5.15284e+07	5.16682e+07	5.42971e+07
1232pos		DG(30:0e)+Na	DG(30:0e)+Na	DG	(30:0e)	(30:0e)				C33 H66 O4 Na1	549.485	1025.04	0.00697887	4.62519	0.11929	0.501321	1.41993e+07	411223	5.96952e+06	2.60635e+08	1.805e+07	1.73437e+06	3.01415e+08	2.35638e+07	5.13023e+06	1.30292e+07	2.14673e+08	1.35958e+06	1.3757e+06	8.29846e+07	5.74756e+07	1.70777e+06	2.15067e+08	2.4187e+07	2.77695e+06	1.29961e+08	8.67712e+07	3.60099e+07	895707	6.53476e+07	1.63718e+08	1.61748e+08	1.6372e+08
1249pos		DG(8:1e_22:6)+Na	DG(30:7e)+Na	DG	(8:1e_22:6)	(8:1e)	(22:6)			C33 H52 O4 Na1	535.376	920.28	0.0194142	1.22478	0.207348	0.257139	1.30996e+08	9.28667e+07	1.00522e+08	9.79256e+07	8.15729e+07	7.55987e+07	4.45429e+07	1.58102e+08	1.23967e+08	9.72278e+07	1.04918e+08	9.7611e+07	1.46892e+08	8.51715e+07	7.17271e+07	9.57243e+07	1.31329e+08	1.37941e+08	1.35412e+08	9.15403e+07	7.59277e+07	9.21654e+07	9.96951e+07	9.79129e+07	9.27157e+07	9.59451e+07	9.58632e+07
1251pos		DG(30:7e)+Na	DG(30:7e)+Na	DG	(30:7e)	(30:7e)				C33 H52 O4 Na1	535.376	984.06	0.0132091	1.17702	0.389927	0.113367	1.94861e+07	1.24995e+07	1.35934e+07	1.04331e+07	1.24807e+07	8.53491e+06	3.7953e+06	1.85837e+07	1.45879e+07	1.33034e+07	1.20507e+07	1.26338e+07	2.03143e+07	9.87804e+06	8.0338e+06	1.6378e+07	1.56201e+07	1.84261e+07	1.70478e+07	1.3742e+07	8.53981e+06	7.56118e+06	1.66168e+07	1.47242e+07	1.15266e+07	1.17901e+07	1.15222e+07
1257pos		DG(31:7e)+Na	DG(31:7e)+Na	DG	(31:7e)	(31:7e)				C34 H54 O4 Na1	549.391	921.699	0.0378304	1.19109	0.246506	0.037817	2.58138e+07	1.61627e+07	1.66872e+07	1.62925e+07	9.80073e+06	1.47734e+07	7.33092e+06	2.36958e+07	2.11037e+07	1.53461e+07	1.60636e+07	1.50724e+07	1.72411e+07	1.62128e+07	1.23709e+07	1.4766e+07	1.61424e+07	2.35691e+07	2.09017e+07	1.54068e+07	1.24485e+07	1.83002e+07	1.43933e+07	1.38418e+07	1.53108e+07	1.64136e+07	1.54742e+07
1268pos		DG(32:0e)+Na	DG(32:0e)+Na	DG	(32:0e)	(32:0e)				C35 H70 O4 Na1	577.517	1067.21	0.00413942	5.02482	0.115456	0.650777	5.86233e+07	2.52881e+06	2.11121e+07	4.15638e+08	1.96265e+07	6.90706e+06	3.8275e+08	4.03937e+07	1.05924e+07	1.67666e+07	2.40271e+08	2.83763e+06	4.62164e+06	1.17039e+08	1.32126e+08	3.81643e+06	1.77135e+08	3.37284e+07	7.12815e+06	1.8568e+08	1.46763e+08	5.13751e+07	3.47644e+06	5.91536e+07	1.91387e+08	1.90022e+08	1.90021e+08
1278pos		DG(32:1e)+Na	DG(32:1e)+Na	DG	(32:1e)	(32:1e)				C35 H68 O4 Na1	575.501	526.933	0.00567314	0.83525	0.451306	0.865872	2.25268e+08	1.38795e+08	2.38846e+08	1.30119e+08	2.89921e+08	3.66587e+08	4.90326e+07	2.44444e+08	2.15468e+08	2.24766e+08	1.57852e+08	1.30877e+08	2.11243e+08	1.36599e+08	9.21291e+07	2.01025e+08	2.08759e+08	1.89025e+08	1.66809e+08	1.88265e+08	6.06305e+07	2.06364e+08	1.88949e+08	2.70718e+08	1.57798e+08	1.56278e+08	1.56238e+08
1288pos		DG(32:1e)+Na	DG(32:1e)+Na	DG	(32:1e)	(32:1e)				C35 H68 O4 Na1	575.501	956.999	0.0101968	0.893847	0.557069	0.188754	1.22008e+07	5.819e+06	1.17705e+07	2.62335e+07	9.71725e+06	5.13311e+06	7.12614e+07	1.12774e+07	7.95833e+06	8.04381e+06	2.26485e+07	7.88681e+06	5.79736e+06	8.3295e+06	9.21657e+06	7.05962e+06	2.07089e+07	7.26056e+06	9.97417e+06	7.89147e+06	8.50747e+06	4.55259e+06	4.23476e+06	8.49674e+06	9.67566e+06	9.67935e+06	9.8494e+06
1289pos		DG(32:1e)+Na	DG(32:1e)+Na	DG	(32:1e)	(32:1e)				C35 H68 O4 Na1	575.501	989.455	0.0429766	0.793426	0.104687	0.561792	6.11466e+07	4.09202e+07	3.5309e+07	5.12078e+07	5.21647e+07	5.06675e+07	1.11818e+08	5.66127e+07	5.96705e+07	5.27812e+07	7.67944e+07	4.17019e+07	4.28195e+07	4.58536e+07	3.32497e+07	4.55193e+07	5.63717e+07	4.11094e+07	4.3255e+07	5.82202e+07	3.21941e+07	2.58492e+07	2.4757e+07	5.96857e+07	4.0359e+07	4.37787e+07	4.31675e+07
128pos		AcCa(22:6)+H	AcCa(22:6)+H	AcCa	(22:6)	(22:6)				C29 H46 O4 N1	472.342	83.3396	0.072775	1.64412	0.141995	0.287052	1.37638e+07	6.5036e+06	1.94872e+07	1.75838e+07	3.08987e+07	2.48007e+07	4.51263e+06	3.33643e+07	2.95284e+07	5.71518e+06	1.89932e+07	4.8689e+06	1.28404e+07	1.82278e+07	3.2342e+06	2.45772e+07	3.2807e+07	3.65855e+07	3.14256e+07	3.27718e+07	1.55229e+07	3.7034e+07	3.59907e+07	3.92632e+07	2.41469e+07	2.12138e+07	2.41192e+07
1290pos		DG(32:1e)+Na	DG(32:1e)+Na	DG	(32:1e)	(32:1e)				C35 H68 O4 Na1	575.501	1015.55	0.0272554	2.46084	0.182815	0.496055	5.50314e+07	1.51985e+07	3.73192e+07	3.39467e+08	2.61691e+07	2.99768e+07	4.27124e+08	4.69373e+07	2.23947e+07	2.09743e+07	2.50871e+08	2.19922e+07	1.96272e+07	9.02807e+07	9.6098e+07	2.45206e+07	2.212e+08	3.82366e+07	1.02635e+07	1.48343e+08	1.52435e+08	3.83071e+07	1.10142e+07	8.52414e+07	1.51347e+08	1.58596e+08	1.51328e+08
1305pos		DG(32:2e)+Na	DG(32:2e)+Na	DG	(32:2e)	(32:2e)				C35 H66 O4 Na1	573.485	947.074	0.0255009	1.07036	0.729047	0.199754	1.06772e+08	3.993e+07	8.91016e+07	4.90993e+07	5.17634e+07	2.70272e+07	2.921e+07	6.85194e+07	5.07724e+07	4.86293e+07	8.89102e+07	5.04162e+07	6.99577e+07	3.20178e+07	5.69011e+07	5.27797e+07	1.05096e+08	5.85903e+07	6.62024e+07	7.20111e+07	2.51137e+07	3.16904e+07	5.00771e+07	5.22446e+07	4.54596e+07	4.75246e+07	4.75323e+07
1306pos		DG(32:2e)+Na	DG(32:2e)+Na	DG	(32:2e)	(32:2e)				C35 H66 O4 Na1	573.485	993.454	0.0128199	1.95683	0.275349	0.230587	1.52561e+07	8.30686e+06	1.0714e+07	1.25391e+08	8.39022e+06	5.29269e+06	2.27037e+08	1.48168e+07	6.91605e+06	8.20444e+06	8.36741e+07	6.19458e+06	7.09966e+06	1.84161e+07	2.03877e+07	1.01384e+07	7.59565e+07	8.53313e+06	9.78151e+06	4.30654e+07	4.61603e+07	6.42731e+06	7.31032e+06	1.96316e+07	4.22652e+07	4.32456e+07	4.23376e+07
1308pos		DG(32:2e)+H	DG(32:2e)+H	DG	(32:2e)	(32:2e)				C35 H67 O4	551.503	1028.76	0.00407905	2.72197	0.205282	0.35426	2.84354e+07	726435	1.45825e+07	1.44785e+08	1.81334e+07	5.95532e+06	1.91885e+08	2.45617e+07	7.00984e+06	1.40967e+07	1.51215e+08	2.59339e+06	1.91735e+06	5.36776e+07	6.04978e+07	2.07494e+06	1.55514e+08	1.58495e+07	3.81485e+06	8.67532e+07	6.24447e+07	1.73061e+07	1.28062e+06	3.86846e+07	1.0347e+08	1.04205e+08	1.04204e+08
1309pos		DG(32:2e)+H	DG(32:2e)+H	DG	(32:2e)	(32:2e)				C35 H67 O4	551.503	1056.66	0.00873005	2.49127	0.19019	0.45482	5.90146e+07	1.54122e+06	3.35097e+07	2.59785e+08	3.14196e+07	1.01339e+07	4.00024e+08	4.47761e+07	1.38272e+07	3.29721e+07	2.89239e+08	4.78935e+06	4.61852e+06	9.9327e+07	1.32735e+08	3.83831e+06	2.9116e+08	3.25788e+07	6.9815e+06	1.73772e+08	1.00152e+08	3.35675e+07	3.13471e+06	9.32522e+07	1.90389e+08	1.87549e+08	1.87528e+08
130pos		AcCa(23:0)+H	AcCa(23:0)+H	AcCa	(23:0)	(23:0)				C30 H60 O4 N1	498.452	394.827	0.0144478	1.70161	0.190725	0.0912816	1.78695e+06	263518	1.55852e+06	923015	2.02251e+06	2.83016e+06	210461	3.79521e+06	2.51646e+06	1.53663e+06	692621	228096	2.90328e+06	2.15802e+06	314989	2.7392e+06	1.16381e+06	4.20104e+06	1.82446e+06	2.8813e+06	615501	2.27022e+06	1.02792e+06	4.83613e+06	1.66214e+06	1.70423e+06	1.66243e+06
131neg		CL(78:8)-2H	CL(78:8)-2H	CL	(78:8)	(78:8)				C87 H152 O17 P2	765.526	839.44	0.00682725	0.866396	0.336227	0.24227	6.25144e+06	5.5689e+06	5.76962e+06	2.38961e+06	5.62627e+06	5.90587e+06	1.90059e+06	2.36536e+06	6.60051e+06	5.87911e+06	1.71554e+06	5.0592e+06	7.71604e+06	5.43483e+06	4.55825e+06	5.59985e+06	4.76769e+06	5.31718e+06	5.76845e+06	4.17431e+06	3.82168e+06	4.56208e+06	5.50861e+06	5.84567e+06	2.63812e+06	2.60395e+06	2.63039e+06
131pos		AcCa(24:0)+H	AcCa(24:0)+H	AcCa	(24:0)	(24:0)				C31 H62 O4 N1	512.467	434.256	0.0446578	1.43595	0.269527	0.102719	4.62441e+06	2.31874e+06	4.06476e+06	5.38247e+06	7.01602e+06	1.06432e+07	2.49799e+06	7.33201e+06	7.11862e+06	5.31289e+06	2.69967e+06	1.57557e+06	7.39087e+06	6.35329e+06	1.87694e+06	7.48197e+06	3.37502e+06	1.49567e+07	6.60641e+06	1.03093e+07	5.34211e+06	9.14057e+06	3.90295e+06	1.21535e+07	5.75566e+06	6.21315e+06	5.7566e+06
1329pos		DG(32:7e)+Na	DG(32:7e)+Na	DG	(32:7e)	(32:7e)				C35 H56 O4 Na1	563.407	921.247	0.0455824	1.13544	0.505333	0.100013	1.88783e+07	1.18119e+07	1.00115e+07	1.61682e+07	8.20651e+06	8.58273e+06	5.04707e+06	1.93252e+07	2.06539e+07	1.53858e+07	1.6473e+07	1.60192e+07	2.06448e+07	1.02181e+07	8.43161e+06	1.42758e+07	2.0614e+07	1.63629e+07	1.84978e+07	1.13858e+07	8.89508e+06	1.15476e+07	1.23611e+07	1.44377e+07	1.29196e+07	1.39765e+07	1.29371e+07
1334pos		DG(33:2e)+Na	DG(33:2e)+Na	DG	(33:2e)	(33:2e)				C36 H68 O4 Na1	587.501	965.28	0.00850961	1.02338	0.92212	0.0676037	1.20647e+07	4.49442e+06	1.14928e+07	3.92404e+06	4.7827e+06	3.03516e+06	1.85526e+07	8.61905e+06	7.38792e+06	5.90568e+06	7.1974e+06	6.63425e+06	7.38477e+06	4.24701e+06	4.98737e+06	6.13098e+06	1.0362e+07	7.07222e+06	8.60193e+06	6.38031e+06	2.83275e+06	2.44468e+06	5.88296e+06	6.51053e+06	6.01761e+06	6.10765e+06	6.01941e+06
1339pos		DG(34:0e)+Na	DG(34:0e)+Na	DG	(34:0e)	(34:0e)				C37 H74 O4 Na1	605.548	722.719	0.0435938	1.39927	0.0262011	0.122427	2.07639e+07	1.04867e+07	1.0737e+07	2.15555e+07	1.11547e+07	6.81395e+06	2.44892e+07	1.09204e+07	1.02174e+07	8.81839e+06	2.40709e+07	1.02454e+07	1.13101e+07	9.31095e+06	1.83917e+07	1.1338e+07	2.08765e+07	1.46935e+07	1.09767e+07	1.57508e+07	1.82341e+07	1.63423e+07	1.03512e+07	1.099e+07	9.09227e+06	9.81803e+06	9.8123e+06
1342pos		DG(34:0e)+Na	DG(34:0e)+Na	DG	(34:0e)	(34:0e)				C37 H74 O4 Na1	605.548	839.743	0.0896066	1.05929	0.919289	0.135409	2.6746e+06	779153	3.27692e+06	3.9976e+06	1.96324e+06	2.41323e+06	4.89393e+06	4.97996e+06	570721	1.04272e+07	7.00709e+06	8.16344e+06	8.64701e+06	5.96941e+06	4.02286e+06	4.51945e+06	1.944e+06	795377	389597	2.79903e+06	925752	1.57555e+06	8.64321e+06	1.1205e+06	2.12843e+06	2.04054e+06	2.41657e+06
134pos		AcCa(24:2)+H	AcCa(24:2)+H	AcCa	(24:2)	(24:2)				C31 H58 O4 N1	508.436	248.771	0.0127046	1.3461	0.575474	0.0595579	3.81142e+06	9.72639e+06	2.93891e+06	6.39134e+06	5.39294e+06	7.66689e+06	1.08608e+07	1.19293e+07	3.70886e+06	3.69363e+07	1.73903e+07	4.71158e+06	1.78996e+06	4.43873e+06	2.27927e+06	1.14489e+07	2.49594e+06	3.01489e+07	1.55283e+07	7.57178e+06	1.08957e+07	4.25648e+07	1.0309e+07	6.88524e+06	1.11251e+07	1.11196e+07	1.08794e+07
1355pos		DG(16:0_18:1)+NH4	DG(34:1)+NH4	DG	(16:0_18:1)	(16:0)	(18:1)			C37 H74 O5 N1	612.556	771.388	0.0314227	0.98363	0.975053	0.0938213	3.60953e+07	2.97354e+06	4.06662e+07	5.68855e+07	2.053e+07	1.6966e+07	8.85004e+07	1.03477e+07	3.1635e+06	4.47344e+06	1.25948e+08	2.72498e+06	1.99464e+06	3.42028e+07	6.16001e+07	2.61502e+06	3.73086e+07	8.87138e+06	1.6432e+06	3.02831e+07	9.15521e+06	1.74116e+07	723402	1.74427e+07	2.10181e+07	2.01597e+07	1.97704e+07
1356pos		DG(16:0_18:1)+Na	DG(34:1)+Na	DG	(16:0_18:1)	(16:0)	(18:1)			C37 H70 O5 Na1	617.512	771.388	0.018989	1.65379	0.361456	0.165545	8.88385e+07	2.79332e+06	4.95342e+07	1.34994e+08	3.12036e+07	1.39052e+07	2.16083e+08	2.33233e+07	7.18223e+06	1.14438e+07	1.83607e+08	4.35919e+06	2.84044e+06	4.75895e+07	1.01572e+08	3.38816e+06	1.07585e+08	2.15532e+07	3.46139e+06	5.91839e+07	1.77477e+07	4.3504e+07	2.11048e+06	4.23589e+07	4.0407e+07	4.17511e+07	4.178e+07
1365pos		DG(16:0_18:1)+Na	DG(34:1)+Na	DG	(16:0_18:1)	(16:0)	(18:1)			C37 H70 O5 Na1	617.512	982.604	0.0186396	0.963298	0.774047	0.202566	2.03419e+07	1.59731e+07	2.09774e+07	1.67094e+07	1.54835e+07	1.42041e+07	1.15327e+07	1.68673e+07	1.99934e+07	1.70334e+07	1.31164e+07	1.95044e+07	2.03585e+07	1.44078e+07	1.15804e+07	1.75579e+07	1.99321e+07	2.09853e+07	1.5947e+07	1.55032e+07	9.79177e+06	1.0979e+07	1.55616e+07	1.90511e+07	1.33981e+07	1.33965e+07	1.29693e+07
136neg		CL(79:12)-2H	CL(79:12)-2H	CL	(79:12)	(79:12)				C88 H146 O17 P2	768.502	491.012	0.0766673	0.859216	0.368726	0.146667	5.53888e+06	4.17553e+06	7.98503e+06	3.52012e+06	2.95633e+06	5.23637e+06	1.39602e+06	4.48999e+06	5.55263e+06	5.01277e+06	5.12032e+06	3.8209e+06	4.68128e+06	2.91651e+06	3.6126e+06	3.55814e+06	5.31735e+06	3.05074e+06	4.21289e+06	2.50518e+06	1.66596e+06	2.89101e+06	5.0578e+06	4.6035e+06	5.0161e+06	4.37886e+06	5.01753e+06
137pos		CL(70:5)+Na	CL(70:5)+Na	CL	(70:5)	(70:5)				C79 H144 O17 P2 Na1	1449.98	1003.65	0.0237806	0.501046	0.108124	0.743126	3.68151e+07	4.10178e+07	3.33154e+07	1.29203e+07	1.34364e+08	3.62063e+07	4.09688e+06	3.89351e+07	5.10148e+07	3.36519e+07	1.40468e+07	7.67424e+07	4.67364e+07	2.44715e+07	2.20428e+07	4.66397e+07	2.69917e+07	3.14934e+07	3.74504e+07	2.36251e+07	1.50222e+07	2.16991e+07	2.62062e+07	3.50096e+07	1.86714e+07	1.91514e+07	1.82632e+07
1383pos		DG(34:1e)+Na	DG(34:1e)+Na	DG	(34:1e)	(34:1e)				C37 H72 O4 Na1	603.532	595.727	0.0387727	1.35318	0.07334	0.582855	1.50095e+08	1.21817e+08	1.92799e+08	1.49175e+08	1.60416e+08	1.05741e+08	6.0911e+07	1.86423e+08	2.04198e+08	1.43146e+08	9.91631e+07	9.52931e+07	1.42434e+08	1.42742e+08	9.75772e+07	1.38925e+08	1.35763e+08	1.87375e+08	1.66433e+08	1.19076e+08	1.03577e+08	2.12339e+08	2.40714e+08	1.84546e+08	1.24519e+08	1.33031e+08	1.24441e+08
1395pos		DG(10:0e_24:1)+Na	DG(34:1e)+Na	DG	(10:0e_24:1)	(10:0e)	(24:1)			C37 H72 O4 Na1	603.532	1002.34	0.0687802	0.850027	0.178936	0.603457	8.88294e+07	6.99907e+07	6.42458e+07	4.30331e+07	5.44619e+07	7.56107e+07	7.15081e+06	7.54928e+07	8.26405e+07	6.67049e+07	3.55857e+07	6.99432e+07	6.24626e+07	7.33863e+07	4.23699e+07	7.62324e+07	6.46997e+07	7.17562e+07	7.9363e+07	5.40465e+07	5.83258e+07	3.24899e+07	5.31471e+07	7.58278e+07	4.93139e+07	5.548e+07	4.94007e+07
1397pos		DG(34:1e)+Na	DG(34:1e)+Na	DG	(34:1e)	(34:1e)				C37 H72 O4 Na1	603.532	1059.6	0.0053775	4.27011	0.108362	1.05817	1.72605e+08	6.51146e+06	8.44541e+07	7.18747e+08	7.09993e+07	1.91564e+07	6.38287e+08	1.09901e+08	2.7417e+07	4.59844e+07	4.72789e+08	1.41174e+07	1.03603e+07	2.81034e+08	2.78412e+08	9.35166e+06	3.41472e+08	1.03103e+08	2.5959e+07	3.77731e+08	3.79696e+08	1.64866e+08	1.23417e+07	1.82808e+08	3.35438e+08	3.32333e+08	3.35457e+08
139pos		CL(70:6)+Na	CL(70:6)+Na	CL	(70:6)	(70:6)				C79 H142 O17 P2 Na1	1447.96	981.78	0.0134625	0.886925	0.514647	0.27701	2.67172e+07	2.06093e+07	2.89675e+07	1.7107e+07	2.408e+07	1.35741e+07	6.98461e+06	3.26495e+07	3.0593e+07	2.83641e+07	1.9112e+07	2.38524e+07	2.37345e+07	1.73913e+07	1.30503e+07	2.66618e+07	2.70823e+07	2.40491e+07	2.79601e+07	1.92184e+07	1.33163e+07	1.31308e+07	1.59057e+07	2.40574e+07	1.99416e+07	2.04125e+07	1.99461e+07
140neg		CL(80:11)-2H	CL(80:11)-2H	CL	(80:11)	(80:11)				C89 H150 O17 P2	776.518	581.293	0.0174494	0.908522	0.547145	0.0903698	3.83732e+07	1.38455e+07	3.83546e+07	1.15192e+07	1.51561e+07	1.64716e+07	8.61176e+06	1.89406e+07	1.58994e+07	1.42271e+07	8.65293e+06	1.15408e+07	1.67973e+07	1.1266e+07	1.63494e+07	1.50751e+07	2.9003e+07	1.16405e+07	1.34774e+07	1.70283e+07	5.25789e+06	1.10639e+07	1.32684e+07	1.93643e+07	1.67365e+07	1.62368e+07	1.67387e+07
1411pos		DG(16:1_18:1)+NH4	DG(34:2)+NH4	DG	(16:1_18:1)	(16:1)	(18:1)			C37 H72 O5 N1	610.541	701.886	0.0155794	1.11157	0.835962	0.129032	1.87205e+08	1.05382e+07	1.46956e+08	2.31681e+08	5.53596e+07	7.64733e+07	3.4498e+08	4.3331e+07	1.58799e+07	2.05362e+07	2.60585e+08	1.10164e+07	7.01834e+06	1.04736e+08	2.03718e+08	9.38101e+06	1.64262e+08	3.12842e+07	7.09086e+06	7.11778e+07	4.12752e+07	7.40893e+07	4.2123e+06	7.53972e+07	7.32048e+07	7.32809e+07	7.12852e+07
141neg		CL(80:12)-H	CL(80:12)-H	CL	(80:12)	(80:12)				C89 H149 O17 P2	1552.03	562.962	0.0299022	0.805809	0.240284	0.278945	1.36929e+07	5.15082e+06	1.40623e+07	5.08485e+06	6.18461e+06	9.87666e+06	2.46598e+06	6.18409e+06	7.66141e+06	4.68457e+06	2.60637e+06	5.57194e+06	7.30326e+06	4.8313e+06	7.35038e+06	6.53525e+06	1.16062e+07	5.30095e+06	6.89345e+06	6.22871e+06	3.18113e+06	5.35957e+06	3.5835e+06	7.26384e+06	5.82031e+06	6.11807e+06	5.80389e+06
141pos		CL(70:7)+H	CL(70:7)+H	CL	(70:7)	(70:7)				C79 H141 O17 P2	1423.96	942.984	0.0396366	1.10231	0.65805	0.164824	7.08245e+07	2.73118e+07	6.25131e+07	3.47316e+07	3.02255e+07	1.77073e+07	1.94719e+07	4.95417e+07	3.41177e+07	3.40713e+07	6.1663e+07	3.63999e+07	5.06758e+07	2.31066e+07	3.64959e+07	3.61944e+07	7.24865e+07	4.06874e+07	4.61867e+07	3.65194e+07	1.54056e+07	2.02765e+07	3.49499e+07	3.54493e+07	3.3949e+07	3.63495e+07	3.39777e+07
142pos		CL(72:6)+Na	CL(72:6)+Na	CL	(72:6)	(72:6)				C81 H146 O17 P2 Na1	1475.99	961.934	0.013136	0.977067	0.904156	0.459485	1.94795e+08	1.30374e+08	1.68517e+08	1.29922e+08	1.33087e+08	9.53082e+07	3.08158e+07	1.882e+08	1.67013e+08	1.3571e+08	1.24003e+08	1.58213e+08	1.87063e+08	1.17265e+08	9.16458e+07	1.81729e+08	1.57501e+08	1.82198e+08	2.07839e+08	1.49625e+08	7.69134e+07	7.81842e+07	1.28237e+08	1.74438e+08	1.3395e+08	1.37146e+08	1.34211e+08
143neg		CL(80:16)-H	CL(80:16)-H	CL	(80:16)	(80:16)				C89 H141 O17 P2	1543.96	918.84	0.0207139	0.682509	0.0243084	0.401323	7.07681e+06	3.76462e+06	6.22773e+06	4.00223e+06	3.73902e+06	2.60551e+06	2.51059e+06	1.4603e+06	2.76701e+06	2.5199e+06	3.52312e+06	3.82051e+06	2.60109e+06	3.54281e+06	2.98429e+06	3.5163e+06	4.51847e+06	2.68095e+06	4.92382e+06	3.44401e+06	2.4299e+06	2.33181e+06	3.08348e+06	1.07827e+06	3.35054e+06	3.45902e+06	3.32814e+06
143pos		CL(72:6)+H	CL(72:6)+H	CL	(72:6)	(72:6)				C81 H147 O17 P2	1454.01	989.973	0.0166248	0.933452	0.595642	0.730886	2.17107e+08	1.53507e+08	1.92728e+08	1.08036e+08	1.63448e+08	2.04957e+08	2.83202e+07	2.176e+08	2.2778e+08	1.77216e+08	1.08114e+08	1.82832e+08	1.89779e+08	1.75141e+08	1.26391e+08	1.93733e+08	1.64318e+08	2.11139e+08	2.10242e+08	1.60535e+08	1.52315e+08	8.36066e+07	1.65079e+08	1.85838e+08	1.36845e+08	1.40821e+08	1.36839e+08
1440pos		DG(34:2e)+Na	DG(34:2e)+Na	DG	(34:2e)	(34:2e)				C37 H70 O4 Na1	601.517	516.893	0.00684233	0.688371	0.199345	0.654984	8.07236e+07	3.77907e+07	7.69379e+07	5.16912e+07	1.13854e+08	9.6413e+07	3.27984e+07	5.99231e+07	6.87916e+07	7.98376e+07	7.47448e+07	3.72222e+07	4.53569e+07	4.19521e+07	3.56997e+07	4.4566e+07	6.36053e+07	4.16387e+07	3.86039e+07	7.21799e+07	2.85619e+07	6.91185e+07	3.33109e+07	5.73629e+07	5.07645e+07	5.01701e+07	5.01651e+07
1441pos		DG(34:2e)+Na	DG(34:2e)+Na	DG	(34:2e)	(34:2e)				C37 H70 O4 Na1	601.517	544.2	0.0111292	1.42885	0.150532	0.164867	4.95846e+07	2.79198e+07	4.91771e+07	3.65647e+07	1.1534e+07	5.08044e+07	2.03299e+07	4.96445e+07	3.56951e+07	6.90051e+06	4.44964e+07	2.42705e+07	3.23116e+07	9.22021e+06	2.549e+07	3.99527e+07	4.72992e+07	3.41519e+07	3.06564e+07	3.2126e+07	2.94155e+07	3.6564e+07	3.52199e+07	4.39133e+07	3.32427e+07	3.38886e+07	3.32445e+07
1442pos		DG(34:2e)+Na	DG(34:2e)+Na	DG	(34:2e)	(34:2e)				C37 H70 O4 Na1	601.517	604.704	0.0495382	1.01456	0.945481	0.0912997	1.53383e+07	6.07761e+06	1.96479e+07	1.02528e+07	1.2345e+07	9.47215e+06	1.6312e+07	8.96666e+06	6.85031e+06	1.84865e+07	1.32718e+07	1.13672e+07	1.07728e+07	1.00284e+07	1.86468e+07	7.95529e+06	1.69317e+07	8.46401e+06	9.43345e+06	9.71279e+06	1.89528e+07	9.56563e+06	1.14381e+07	1.05838e+07	9.48672e+06	1.03528e+07	1.03473e+07
1447pos		DG(34:2e)+Na	DG(34:2e)+Na	DG	(34:2e)	(34:2e)				C37 H70 O4 Na1	601.517	751.853	0.010552	0.764669	0.21399	0.428461	3.65462e+07	1.81972e+07	4.24723e+07	2.8266e+07	4.76666e+07	3.39896e+07	9.81184e+06	3.00831e+07	2.79569e+07	2.31567e+07	5.07854e+07	4.23268e+07	2.15056e+07	1.50804e+07	3.0854e+07	2.74715e+07	3.00949e+07	3.29362e+07	2.53912e+07	2.94385e+07	1.22268e+07	2.1126e+07	2.79663e+07	4.24194e+07	1.98562e+07	1.94954e+07	1.9856e+07
1449pos		DG(34:2e)+H	DG(34:2e)+H	DG	(34:2e)	(34:2e)				C37 H71 O4	579.535	776.463	0.0502922	0.79031	0.627219	0.0878302	343107	1.91227e+06	482909	1.04811e+06	3.55536e+06	6.96087e+06	693718	1.9593e+06	2.50768e+06	1.75992e+06	2.45973e+06	1.32687e+06	5.86821e+06	2.27918e+06	297744	3.07929e+06	330739	1.50723e+06	1.23058e+06	2.56113e+06	1.02108e+06	1.51366e+06	1.36494e+06	2.18875e+06	1.65716e+06	1.52776e+06	1.51459e+06
144neg		CL(81:6)-H	CL(81:6)-H	CL	(81:6)	(81:6)				C90 H163 O17 P2	1578.14	657.494	0.024233	0.902421	0.592398	0.0582176	3.32866e+06	4.19882e+06	3.98615e+06	3.91847e+06	4.3311e+06	5.41952e+06	671244	1.7958e+06	4.47649e+06	2.79789e+06	924723	2.85524e+06	3.24984e+06	2.95151e+06	3.10837e+06	3.03434e+06	3.14625e+06	5.42438e+06	2.92902e+06	3.69559e+06	2.62773e+06	3.81742e+06	3.41781e+06	4.47965e+06	3.0304e+06	2.90664e+06	2.9067e+06
144pos		CL(72:7)+H	CL(72:7)+H	CL	(72:7)	(72:7)				C81 H145 O17 P2	1452	973.435	0.00587597	1.02141	0.893596	0.733179	5.94837e+08	3.94865e+08	4.74864e+08	3.86913e+08	4.10626e+08	3.10008e+08	1.50129e+08	5.50792e+08	5.11743e+08	4.36124e+08	3.66762e+08	4.93685e+08	5.63125e+08	3.62146e+08	3.01867e+08	4.89973e+08	5.05113e+08	5.43571e+08	5.65359e+08	4.41802e+08	3.01749e+08	2.35434e+08	4.71885e+08	4.78856e+08	3.99155e+08	4.03246e+08	4.03246e+08
1450pos		DG(34:2e)+Na	DG(34:2e)+Na	DG	(34:2e)	(34:2e)				C37 H70 O4 Na1	601.517	777.575	0.0308045	1.24404	0.325098	0.112386	1.02591e+07	6.80369e+06	1.2882e+07	2.61339e+07	1.05904e+07	1.294e+07	9.25278e+06	1.81388e+07	1.35359e+07	7.83372e+06	1.62044e+07	8.97327e+06	1.59426e+07	1.40112e+07	1.45031e+07	1.03552e+07	7.84863e+06	1.08926e+07	7.60444e+06	1.18298e+07	6.24705e+06	7.33554e+06	9.54903e+06	1.34748e+07	6.71228e+06	7.07842e+06	7.08861e+06
1461pos		DG(34:2e)+Na	DG(34:2e)+Na	DG	(34:2e)	(34:2e)				C37 H70 O4 Na1	601.517	998.418	0.148726	1.0919	0.563029	0.268041	2.25478e+08	1.06709e+08	9.82358e+07	1.69077e+08	1.45081e+08	1.69351e+08	2.32193e+08	2.00984e+08	1.67935e+08	1.32138e+08	1.91236e+08	1.46027e+08	1.50931e+08	2.66842e+08	1.50391e+08	1.54176e+08	1.99405e+08	2.05067e+08	1.40596e+08	1.70795e+08	1.60592e+08	7.70039e+07	1.22508e+08	1.92362e+08	9.64749e+07	1.26503e+08	1.26457e+08
1464pos		DG(34:2e)+Na	DG(34:2e)+Na	DG	(34:2e)	(34:2e)				C37 H70 O4 Na1	601.517	1045.98	0.0128621	1.98906	0.0716839	0.34636	4.07812e+07	6.79565e+06	2.37413e+07	1.07482e+08	1.3628e+07	1.64126e+07	8.18852e+07	3.70289e+07	1.61208e+07	1.91639e+07	6.3772e+07	1.38027e+07	1.0818e+07	4.42915e+07	4.95486e+07	6.14191e+06	4.93916e+07	2.45773e+07	1.07031e+07	3.61295e+07	4.86115e+07	3.10197e+07	8.07593e+06	3.35537e+07	4.04795e+07	4.07329e+07	3.97353e+07
1465pos		DG(34:2e)+Na	DG(34:2e)+Na	DG	(34:2e)	(34:2e)				C37 H70 O4 Na1	601.517	1070.01	0.032353	1.40917	0.0911725	0.14849	1.53282e+07	5.3417e+06	1.52723e+07	3.61666e+07	9.79575e+06	1.32773e+07	3.19004e+07	1.02962e+07	9.81873e+06	7.89188e+06	1.49604e+07	5.91996e+06	1.51978e+07	1.18156e+07	2.32035e+07	6.42359e+06	1.44211e+07	1.25466e+07	6.88329e+06	1.85605e+07	1.43761e+07	1.05194e+07	6.26819e+06	1.74008e+07	1.30267e+07	1.30628e+07	1.23278e+07
1490pos		DG(34:3e)+H	DG(34:3e)+H	DG	(34:3e)	(34:3e)				C37 H69 O4	577.519	576.528	0.0150427	1.2653	0.0135366	0.724343	6.11174e+08	3.79291e+08	6.70105e+08	5.49798e+08	4.89713e+08	3.15606e+08	3.7072e+08	5.30712e+08	4.89074e+08	4.88828e+08	6.55771e+08	4.2483e+08	4.90406e+08	5.40019e+08	4.73323e+08	6.24976e+08	6.55984e+08	6.39416e+08	5.0877e+08	5.53864e+08	5.07787e+08	5.37003e+08	5.93355e+08	5.72561e+08	4.74451e+08	4.86771e+08	4.87277e+08
1496pos		DG(34:3e)+Na	DG(34:3e)+Na	DG	(34:3e)	(34:3e)				C37 H68 O4 Na1	599.501	701.136	0.0453243	1.32982	0.027775	0.5848	1.62041e+08	1.38449e+08	1.08707e+08	1.1706e+08	1.36273e+08	1.66739e+08	4.23571e+07	2.1987e+08	2.46544e+08	1.266e+08	1.34416e+08	1.40301e+08	2.16391e+08	8.4721e+07	1.24402e+08	1.37124e+08	1.53049e+08	2.30342e+08	1.51963e+08	2.20203e+08	1.27409e+08	1.4697e+08	2.0309e+08	2.67096e+08	1.19141e+08	1.30162e+08	1.27082e+08
149neg		CL(82:19)-H	CL(82:19)-H	CL	(82:19)	(82:19)				C91 H139 O17 P2	1565.95	907.654	0.0275837	0.533136	0.0214777	0.56097	1.29938e+07	3.3859e+06	1.05475e+07	4.40506e+06	6.38491e+06	3.33102e+06	2.99998e+06	1.40674e+06	3.077e+06	1.85681e+06	5.4044e+06	4.26109e+06	2.38876e+06	4.09919e+06	4.34338e+06	3.27254e+06	6.90709e+06	2.38401e+06	5.74593e+06	3.21316e+06	2.8294e+06	2.38755e+06	1.91363e+06	1.63023e+06	4.27404e+06	4.07732e+06	4.075e+06
1501pos		DG(34:3e)+H	DG(34:3e)+H	DG	(34:3e)	(34:3e)				C37 H69 O4	577.519	772.584	0.033545	0.832658	0.684929	0.0970095	9.47299e+06	2.67509e+06	1.08183e+07	1.4624e+07	5.5987e+06	5.15825e+06	2.70515e+07	3.50298e+06	1.13124e+06	771045	2.71652e+07	1.52051e+06	826800	7.91305e+06	1.42019e+07	1.09769e+06	1.01536e+07	2.27408e+06	429666	6.16531e+06	2.57927e+06	3.92806e+06	338965	4.96538e+06	5.68746e+06	5.37441e+06	5.36448e+06
1516pos		DG(12:0e_22:3)+Na	DG(34:3e)+Na	DG	(12:0e_22:3)	(12:0e)	(22:3)			C37 H68 O4 Na1	599.501	998.306	0.0441395	0.85065	0.326713	0.995252	2.47525e+08	1.80963e+08	2.40463e+08	1.61358e+08	3.51627e+08	2.33898e+08	1.32068e+08	2.60377e+08	2.67072e+08	2.26035e+08	1.75457e+08	2.19555e+08	2.63321e+08	2.28504e+08	1.54815e+08	3.28438e+08	2.1486e+08	2.39744e+08	2.60317e+08	1.74863e+08	1.41475e+08	1.12622e+08	2.34953e+08	2.01787e+08	2.44203e+08	2.63089e+08	2.43707e+08
1521pos		DG(34:3e)+H	DG(34:3e)+H	DG	(34:3e)	(34:3e)				C37 H69 O4	577.519	1066.06	0.0104501	3.87484	0.117897	1.07149	1.67098e+08	5.13143e+06	8.09831e+07	9.0137e+08	8.85133e+07	2.24247e+07	6.28799e+08	1.28338e+08	3.44345e+07	6.41427e+07	6.17248e+08	1.427e+07	1.05477e+07	3.21075e+08	3.31016e+08	1.03231e+07	5.94297e+08	1.12047e+08	2.38434e+07	4.73082e+08	4.05912e+08	1.79261e+08	9.87068e+06	2.32928e+08	4.58337e+08	4.58443e+08	4.66737e+08
1535pos		DG(34:4e)+H	DG(34:4e)+H	DG	(34:4e)	(34:4e)				C37 H67 O4	575.503	511.27	0.0189838	0.696317	0.211614	0.612367	5.54757e+07	3.39791e+07	4.92922e+07	4.36276e+07	8.84249e+07	1.1441e+08	3.91828e+07	6.11216e+07	7.221e+07	7.78237e+07	4.4096e+07	3.5849e+07	4.75682e+07	3.99298e+07	3.01952e+07	4.73714e+07	5.02391e+07	3.59596e+07	3.4898e+07	5.55955e+07	4.68537e+07	4.55631e+07	3.12837e+07	6.22182e+07	4.35902e+07	4.50555e+07	4.50557e+07
153neg		CL(82:8)-2H	CL(82:8)-2H	CL	(82:8)	(82:8)				C91 H160 O17 P2	793.557	903.54	0.00283044	0.847332	0.27752	0.155432	5.58869e+06	6.07928e+06	3.80096e+06	5.43427e+06	4.04045e+06	5.61509e+06	4.73216e+06	1.52396e+06	4.88776e+06	4.60493e+06	1.41937e+06	4.64835e+06	4.26223e+06	4.78879e+06	3.9347e+06	4.50433e+06	4.1764e+06	4.78508e+06	4.74265e+06	4.68672e+06	5.80852e+06	4.54689e+06	4.26514e+06	3.21051e+06	3.50393e+06	3.52271e+06	3.50767e+06
1562pos		DG(34:4e)+Na	DG(34:4e)+Na	DG	(34:4e)	(34:4e)				C37 H66 O4 Na1	597.485	929	0.0107009	1.20365	0.350098	0.223763	2.35351e+07	2.05734e+07	1.57182e+07	1.90954e+07	2.13496e+07	2.12316e+07	4.05763e+06	3.90054e+07	3.91173e+07	2.60902e+07	1.39874e+07	3.02201e+07	4.62849e+07	2.17427e+07	9.63369e+06	2.54919e+07	1.99433e+07	3.0244e+07	3.15004e+07	2.75775e+07	1.15064e+07	2.73206e+07	2.73476e+07	2.86523e+07	2.24654e+07	2.28896e+07	2.28844e+07
1570pos		DG(34:4e)+H	DG(34:4e)+H	DG	(34:4e)	(34:4e)				C37 H67 O4	575.503	1028	0.012411	3.44956	0.159426	0.786612	1.06499e+08	3.6757e+06	4.56767e+07	6.06098e+08	6.43981e+07	1.54979e+07	2.04015e+08	7.94277e+07	2.34038e+07	3.94461e+07	4.95603e+08	8.4313e+06	6.56813e+06	1.86218e+08	1.87415e+08	6.88081e+06	3.94251e+08	5.77658e+07	1.57281e+07	2.86836e+08	2.60087e+08	9.90155e+07	4.83217e+06	1.36334e+08	2.96799e+08	3.03261e+08	3.03283e+08
1571pos		DG(34:4e)+H	DG(34:4e)+H	DG	(34:4e)	(34:4e)				C37 H67 O4	575.503	1055.88	0.0087806	2.45872	0.0920213	0.345268	2.42772e+07	2.61662e+06	1.69583e+07	1.08378e+08	1.4693e+07	6.81152e+06	9.44619e+07	2.55184e+07	8.16161e+06	1.22519e+07	6.84019e+07	3.68773e+06	2.3294e+06	3.62502e+07	2.82745e+07	3.88843e+06	5.76826e+07	1.77925e+07	6.82845e+06	3.78835e+07	3.66669e+07	2.99737e+07	3.00632e+06	3.65683e+07	4.42649e+07	4.34943e+07	4.38875e+07
157pos		CL(72:9)+H	CL(72:9)+H	CL	(72:9)	(72:9)				C81 H141 O17 P2	1447.96	928.338	0.0604502	1.23184	0.310191	0.204315	1.74953e+07	1.77097e+07	1.45106e+07	1.5349e+07	1.39825e+07	1.92107e+07	690086	3.06048e+07	3.2145e+07	1.9176e+07	1.24973e+07	2.3917e+07	3.70147e+07	1.45179e+07	1.02363e+07	2.02842e+07	1.97985e+07	2.70493e+07	2.48928e+07	2.29645e+07	8.52257e+06	2.14429e+07	2.18173e+07	2.16533e+07	1.70222e+07	1.70391e+07	1.88782e+07
1587pos		DG(34:5e)+H	DG(34:5e)+H	DG	(34:5e)	(34:5e)				C37 H65 O4	573.488	967.488	0.0169283	1.0329	0.814411	0.128547	3.97876e+07	1.46062e+07	3.13652e+07	3.56797e+07	1.64665e+07	9.24092e+06	4.55076e+07	2.1637e+07	1.72365e+07	1.73708e+07	3.33084e+07	1.77879e+07	1.96271e+07	1.55039e+07	2.20383e+07	1.9801e+07	4.42176e+07	1.77127e+07	2.13512e+07	2.08164e+07	1.30185e+07	1.29706e+07	1.50435e+07	1.93174e+07	1.93941e+07	1.99727e+07	1.99754e+07
1589pos		DG(34:5e)+H	DG(34:5e)+H	DG	(34:5e)	(34:5e)				C37 H65 O4	573.488	1012.37	0.0197598	4.38646	0.219485	0.351979	1.11595e+07	862907	6.20269e+06	1.377e+08	7.72156e+06	2.06771e+06	1.46116e+08	1.39771e+07	3.47242e+06	6.02785e+06	8.7076e+07	2.18326e+06	1.44126e+06	3.12314e+07	2.88316e+07	1.69926e+06	9.24557e+07	8.1482e+06	3.4249e+06	6.63756e+07	6.28756e+07	1.03227e+07	1.00144e+06	3.1175e+07	6.36447e+07	6.58565e+07	6.3661e+07
158pos		CL(74:8)+H	CL(74:8)+H	CL	(74:8)	(74:8)				C83 H147 O17 P2	1478.01	974.801	0.00722184	0.994702	0.971851	0.421441	1.46362e+08	9.47179e+07	1.06938e+08	9.79314e+07	1.13142e+08	8.93409e+07	3.00079e+07	1.20517e+08	1.28717e+08	1.01913e+08	7.80188e+07	1.24757e+08	1.49011e+08	1.03177e+08	6.37943e+07	1.08168e+08	1.16424e+08	1.29929e+08	1.39878e+08	1.17086e+08	7.9752e+07	5.64202e+07	1.24603e+08	1.16979e+08	1.01215e+08	1.02489e+08	1.02494e+08
1591pos		DG(34:8e)+Na	DG(34:8e)+Na	DG	(34:8e)	(34:8e)				C37 H58 O4 Na1	589.423	921.116	0.0488004	1.30425	0.161792	0.105457	1.55166e+07	9.49555e+06	6.74252e+06	1.30067e+07	6.67694e+06	7.21091e+06	5.0626e+06	1.99751e+07	1.73872e+07	1.22061e+07	1.38906e+07	1.29994e+07	1.53893e+07	9.11856e+06	9.45735e+06	9.66326e+06	1.60488e+07	1.48893e+07	1.46239e+07	1.10527e+07	7.86897e+06	1.19501e+07	1.23727e+07	1.48433e+07	1.16706e+07	1.26831e+07	1.16659e+07
1593pos		DG(35:3e)+Na	DG(35:3e)+Na	DG	(35:3e)	(35:3e)				C38 H70 O4 Na1	613.517	529.858	0.00335263	1.05275	0.760823	0.0958895	1.49925e+07	9.74213e+06	1.08767e+07	8.55882e+06	1.26167e+07	1.49026e+07	5.7651e+06	1.70635e+07	1.3114e+07	1.22784e+07	1.08715e+07	6.46519e+06	1.11242e+07	8.63745e+06	4.45498e+06	8.54971e+06	1.40385e+07	1.11828e+07	8.62566e+06	1.19056e+07	7.02345e+06	1.07015e+07	1.09448e+07	1.29793e+07	9.6382e+06	9.638e+06	9.69418e+06
15pos		AcCa(16:0)+H	AcCa(16:0)+H	AcCa	(16:0)	(16:0)				C23 H46 O4 N1	400.342	102.94	0.00689753	2.54815	0.0529368	1.20443	1.2973e+08	2.66356e+07	1.56038e+08	2.91007e+08	1.05257e+08	1.3098e+08	6.97707e+08	2.12012e+08	3.16138e+08	8.57435e+07	3.26073e+08	2.18375e+07	6.78076e+07	1.99727e+08	1.75979e+08	1.46146e+08	3.69693e+08	2.1277e+08	9.61567e+07	2.42603e+08	4.11123e+08	2.1898e+08	6.62975e+07	3.04539e+08	1.97981e+08	2.00357e+08	1.97983e+08
1601pos		DG(18:0_18:0)+Na	DG(36:0)+Na	DG	(18:0_18:0)	(18:0)	(18:0)			C39 H76 O5 Na1	647.558	888.292	0.0301006	0.946282	0.78149	0.157519	1.62285e+07	1.19809e+07	8.29877e+06	9.54318e+06	9.44977e+06	7.73845e+06	1.35907e+06	1.14685e+07	2.09569e+07	1.70094e+07	1.06056e+07	1.48644e+07	1.53297e+07	1.40919e+07	1.11076e+07	8.48432e+06	8.94568e+06	1.33392e+07	2.39158e+07	2.02556e+07	1.24669e+07	1.79557e+07	9.83481e+06	1.33796e+07	9.74531e+06	1.02877e+07	9.79723e+06
1605pos		DG(18:0_18:1)+Na	DG(36:1)+Na	DG	(18:0_18:1)	(18:0)	(18:1)			C39 H74 O5 Na1	645.543	759.42	0.0107003	0.951385	0.903123	0.16364	3.47045e+07	1.4384e+07	1.31847e+07	3.36135e+06	1.08427e+07	1.41975e+07	2.79742e+07	7.56838e+06	7.71385e+06	5.83128e+06	5.21159e+06	3.69217e+06	3.94751e+06	2.74379e+06	4.13238e+06	3.06184e+06	8.26444e+06	6.19788e+06	5.90204e+06	1.69953e+07	2.359e+07	5.40991e+06	5.46954e+06	7.5361e+06	7.01211e+06	7.0162e+06	6.885e+06
1606pos		DG(18:0_18:1)+NH4	DG(36:1)+NH4	DG	(18:0_18:1)	(18:0)	(18:1)			C39 H78 O5 N1	640.587	819.881	0.059813	0.933827	0.871078	0.0805232	9.28527e+06	2.90459e+06	1.1671e+07	1.39328e+07	6.0564e+06	8.12239e+06	1.98927e+07	3.92174e+06	1.30683e+06	2.32671e+06	2.28329e+07	1.34437e+06	1.15091e+06	1.10277e+07	1.23117e+07	1.12404e+06	7.47877e+06	4.0801e+06	878862	9.96311e+06	3.48389e+06	6.4686e+06	1.09654e+06	3.65115e+06	5.56651e+06	5.66348e+06	5.0588e+06
160neg		CL(86:14)-2H	CL(86:14)-2H	CL	(86:14)	(86:14)				C95 H156 O17 P2	815.541	497.422	0.0347513	1.12132	0.553068	0.25154	5.64431e+06	4.17244e+06	4.28803e+06	1.15874e+06	4.69076e+06	3.96633e+06	1.54028e+06	4.65018e+06	2.56948e+06	1.60298e+06	5.13917e+06	3.77169e+06	4.4469e+06	2.72917e+06	2.36752e+06	4.69798e+06	5.93642e+06	3.70973e+06	4.45338e+06	5.10669e+06	1.6981e+06	4.89476e+06	6.00673e+06	4.82695e+06	2.97827e+06	3.16118e+06	2.97822e+06
160pos		CL(76:11)+H	CL(76:11)+H	CL	(76:11)	(76:11)				C85 H145 O17 P2	1500	984.376	0.0048385	0.990157	0.925859	0.293434	5.39581e+07	3.96869e+07	5.1814e+07	3.62411e+07	5.2705e+07	3.18981e+07	9.89735e+06	4.59107e+07	4.82473e+07	3.70974e+07	4.1235e+07	4.99573e+07	4.5152e+07	4.33152e+07	2.9262e+07	4.04549e+07	4.33765e+07	5.2025e+07	5.33246e+07	4.5244e+07	3.97657e+07	3.30907e+07	4.61201e+07	4.48318e+07	4.39201e+07	4.35535e+07	4.3921e+07
161neg		CL(86:17)-2H	CL(86:17)-2H	CL	(86:17)	(86:17)				C95 H150 O17 P2	812.518	750.796	0.00388649	0.920465	0.56867	0.0270472	1.14636e+06	1.32712e+06	969807	5.39172e+06	1.0044e+06	1.00139e+06	3.37643e+06	390397	920265	1.09261e+06	446877	1.12672e+06	1.00051e+06	1.26192e+06	1.18519e+06	220543	2.00265e+06	1.31591e+06	1.12117e+06	3.38078e+06	1.10523e+06	1.35409e+06	976487	1.2293e+06	1.40695e+06	1.3975e+06	1.40694e+06
161pos		CL(76:12)+H	CL(76:12)+H	CL	(76:12)	(76:12)				C85 H143 O17 P2	1497.98	930.515	0.0148981	0.912331	0.598532	0.786674	4.76353e+08	1.74153e+08	3.45276e+08	2.01932e+08	2.36727e+08	1.50808e+08	5.97403e+07	2.94084e+08	2.57667e+08	2.22929e+08	4.25745e+08	2.39207e+08	2.31524e+08	1.71248e+08	2.06471e+08	2.12614e+08	3.63339e+08	2.19433e+08	3.40574e+08	2.15187e+08	1.22611e+08	1.53691e+08	2.2344e+08	2.44789e+08	2.21351e+08	2.27177e+08	2.27148e+08
1624pos		DG(18:1_18:1)+NH4	DG(36:2)+NH4	DG	(18:1_18:1)	(18:1)	(18:1)			C39 H76 O5 N1	638.572	778.651	0.0242171	0.997303	0.993659	0.239862	8.62574e+07	3.47276e+07	2.33896e+08	9.18849e+07	4.79795e+07	5.35237e+07	1.47306e+08	2.88615e+07	1.5831e+07	2.83052e+07	1.51751e+08	1.38814e+07	1.43852e+07	6.40637e+07	2.73117e+08	1.26298e+07	5.7118e+07	2.56033e+07	1.18539e+07	4.81688e+07	6.20397e+07	4.60905e+07	1.27781e+07	2.98177e+07	3.60286e+07	3.60933e+07	3.45703e+07
1625pos		DG(18:1_18:1)+H	DG(36:2)+H	DG	(18:1_18:1)	(18:1)	(18:1)			C39 H73 O5	621.545	778.651	0.0780883	1.72739	0.369761	0.0527134	8.97223e+06	236316	6.97409e+06	1.20833e+07	2.8123e+06	1.59424e+06	1.32846e+07	2.16194e+06	583005	902536	1.86678e+07	445085	364539	5.71698e+06	1.0617e+07	330656	6.46873e+06	1.91641e+06	283881	5.55794e+06	1.11206e+06	4.93782e+06	345504	3.60779e+06	3.49668e+06	3.04854e+06	3.5066e+06
1626pos		DG(18:1_18:1)+Na	DG(36:2)+Na	DG	(18:1_18:1)	(18:1)	(18:1)			C39 H72 O5 Na1	643.527	778.651	0.0399314	2.68244	0.145804	0.703619	3.37029e+08	7.6437e+06	1.65366e+08	4.04321e+08	9.15694e+07	3.42773e+07	5.15189e+08	1.0837e+08	3.98834e+07	3.4555e+07	4.74624e+08	1.33331e+07	8.02936e+06	1.34945e+08	2.79947e+08	8.39061e+06	2.34657e+08	1.03001e+08	2.75201e+07	1.53809e+08	7.54676e+07	2.46496e+08	1.89941e+07	1.34193e+08	1.18293e+08	1.27936e+08	1.21637e+08
1636pos		DG(36:2e)+Na	DG(36:2e)+Na	DG	(36:2e)	(36:2e)				C39 H74 O4 Na1	629.548	596.037	0.0294864	0.898942	0.353066	0.560125	1.1575e+08	6.22566e+07	8.14797e+07	7.1512e+07	8.77073e+07	6.30844e+07	6.83212e+07	7.29222e+07	7.6829e+07	7.78749e+07	8.26138e+07	8.26416e+07	6.84918e+07	7.42626e+07	7.41677e+07	7.29766e+07	9.51968e+07	8.00085e+07	7.35231e+07	7.38356e+07	3.54847e+07	7.24567e+07	7.25422e+07	7.37209e+07	6.99566e+07	7.37348e+07	7.35703e+07
1637pos		DG(36:2e)+Na	DG(36:2e)+Na	DG	(36:2e)	(36:2e)				C39 H74 O4 Na1	629.548	622.306	0.017429	1.22995	0.363742	0.0197156	3.56237e+07	1.44054e+07	2.58015e+07	1.39246e+07	2.679e+07	7.82055e+06	1.73425e+07	2.66984e+07	9.67109e+06	1.0584e+07	1.92685e+07	1.46799e+07	1.12608e+07	1.26022e+07	1.49613e+07	1.5103e+07	3.30254e+07	2.36571e+07	1.65089e+07	2.41061e+07	1.43182e+07	1.44027e+07	2.13281e+07	1.12298e+07	1.53304e+07	1.57988e+07	1.58064e+07
163neg		Cer(d18:1_14:0)+HCOO	Cer(d32:1)+HCOO	Cer	(d18:1_14:0)	(d18:1)	(14:0)			C33 H64 O5 N1	554.479	555.065	0.0305625	1.15633	0.133956	0.418445	5.64396e+06	5.75529e+06	6.32929e+06	8.33062e+06	4.65534e+06	4.93924e+06	6.50179e+06	7.62901e+06	6.23339e+06	5.51397e+06	1.55683e+06	5.69792e+06	7.09465e+06	5.23606e+06	5.63125e+06	5.09792e+06	5.83783e+06	6.08418e+06	6.06324e+06	5.68447e+06	7.04272e+06	5.02155e+06	4.85308e+06	5.57078e+06	5.40817e+06	5.12572e+06	5.40577e+06
1645pos		DG(36:2e)+H	DG(36:2e)+H	DG	(36:2e)	(36:2e)				C39 H75 O4	607.566	887.22	0.0200665	0.628454	0.0286336	0.144106	1.71516e+06	3.61729e+06	1.57839e+06	1.00924e+06	1.93885e+06	2.78275e+06	718222	1.01263e+06	1.64719e+06	1.4684e+06	1.6496e+06	2.75025e+06	2.02195e+06	2.99788e+06	3.00777e+06	1.29741e+06	876382	1.20464e+06	1.94608e+06	3.57694e+06	1.76429e+06	1.53276e+06	1.57858e+06	1.45453e+06	1.4544e+06	1.45784e+06	1.40618e+06
1647pos		DG(36:2e)+Na	DG(36:2e)+Na	DG	(36:2e)	(36:2e)				C39 H74 O4 Na1	629.548	999.6	0.0193829	1.13957	0.530544	0.2275	5.49897e+07	3.36094e+07	4.58621e+07	1.93799e+07	3.72853e+07	5.90251e+07		5.41466e+07	4.99694e+07	4.054e+07	1.39323e+07	4.07825e+07	6.22488e+07	3.47057e+07	2.54061e+07	5.08863e+07	4.2231e+07	6.90359e+07	5.00518e+07	3.56009e+07	2.55995e+07	2.12621e+07	6.547e+07	5.05687e+07	3.32693e+07	3.44062e+07	3.44174e+07
164pos		CL(86:14)+H	CL(86:14)+H	CL	(86:14)	(86:14)				C95 H159 O17 P2	1634.1	544.733	0.0287185	1.13137	0.538395	0.0336071	2.54759e+07	6.25627e+06	2.13518e+07	3.81871e+07	1.77402e+07	2.41984e+07	3.96648e+07	2.46961e+07	2.21428e+07	2.82007e+07	2.89937e+07	1.99908e+07	2.09297e+07	4.62729e+07	2.51434e+07	2.20625e+07	2.2131e+07	1.9716e+07	2.29524e+07	2.53454e+07	3.34793e+07	2.27248e+07	1.34705e+07	1.37564e+07	2.79751e+07	2.66411e+07	2.66156e+07
1653pos		DG(18:1_18:2)+NH4	DG(36:3)+NH4	DG	(18:1_18:2)	(18:1)	(18:2)			C39 H74 O5 N1	636.556	721.86	0.0206667	1.37997	0.545584	0.297317	1.58051e+09	4.45236e+07	7.70436e+08	8.83447e+08	2.90597e+08	1.91135e+08	1.13251e+09	2.2709e+08	5.50506e+07	8.85972e+07	1.71706e+09	3.91646e+07	1.76081e+07	2.8842e+08	1.17446e+09	2.26376e+07	5.80633e+08	1.56563e+08	4.1556e+07	2.95685e+08	1.53929e+08	3.85212e+08	1.94677e+07	3.06495e+08	2.87815e+08	2.99682e+08	2.91649e+08
1654pos		DG(18:1_18:2)+H	DG(36:3)+H	DG	(18:1_18:2)	(18:1)	(18:2)			C39 H71 O5	619.53	721.86	0.0558933	1.44472	0.494755	0.0685663	7.76114e+07	2.09298e+06	4.24471e+07	4.30431e+07	1.22307e+07	9.05954e+06	5.51913e+07	1.04493e+07	2.23703e+06	3.91884e+06	8.62963e+07	1.9409e+06	889881	1.683e+07	5.80492e+07	973349	2.75115e+07	6.856e+06	1.7398e+06	1.51275e+07	6.95077e+06	1.85576e+07	1.05791e+06	1.32604e+07	1.44838e+07	1.59605e+07	1.45355e+07
1655pos		DG(18:1_18:2)+Na	DG(36:3)+Na	DG	(18:1_18:2)	(18:1)	(18:2)			C39 H70 O5 Na1	641.512	721.86	0.050093	1.35664	0.580593	0.273725	6.35578e+08	1.42528e+07	3.08776e+08	4.09517e+08	1.99622e+08	7.75308e+07	6.37656e+08	1.41254e+08	3.33091e+07	6.42502e+07	7.49448e+08	2.06471e+07	7.2088e+06	1.47195e+08	5.50078e+08	1.0832e+07	3.07875e+08	7.90574e+07	2.05198e+07	1.70583e+08	1.12311e+08	1.89048e+08	9.46542e+06	1.63348e+08	1.75526e+08	1.93093e+08	1.79823e+08
1666pos		DG(18:1_18:2)+H	DG(36:3)+H	DG	(18:1_18:2)	(18:1)	(18:2)			C39 H71 O5	619.53	845.702	0.0257621	0.905034	0.203214	0.245345	1.66323e+07	1.23812e+07	1.46764e+07	1.49644e+07	1.31813e+07	1.19641e+07	1.01457e+07	1.27401e+07	1.5913e+07	1.49906e+07	2.55091e+07	1.46268e+07	1.25714e+07	1.61303e+07	1.34981e+07	8.80203e+06	1.4526e+07	1.21157e+07	1.54469e+07	2.59012e+07	9.53281e+06	1.53413e+07	1.24463e+07	1.40252e+07	1.28362e+07	1.31052e+07	1.35092e+07
166pos		Cer(d28:0)+H	Cer(d28:0)+H	Cer	(d28:0)	(d28:0)				C28 H58 O3 N1	456.441	276.603	0.00815829	1.18714	0.686474	0.0450913	8.86926e+06	4.48701e+06	2.31017e+07	2.58939e+07	2.84014e+07	3.29088e+07	1.94285e+07	2.70771e+07	1.38143e+07	6.0276e+06	2.67511e+07	4.57862e+06	4.62364e+06	1.15354e+07	4.88498e+06	2.09872e+07	2.35688e+07	2.98736e+07	1.27914e+07	1.64781e+07	9.71381e+06	1.14593e+07	2.31389e+07	3.21966e+07	1.50372e+07	1.52514e+07	1.50386e+07
167neg		Cer(d17:1_16:0)+HCOO	Cer(d33:1)+HCOO	Cer	(d17:1_16:0)	(d17:1)	(16:0)			C34 H66 O5 N1	568.495	589.2	0.0250555	0.955886	0.263886	0.357881	6.00335e+07	6.78856e+07	5.03259e+07	7.53122e+07	5.81447e+07	6.13913e+07	5.39723e+07	5.49365e+07	6.81048e+07	6.29144e+07	1.45558e+07	6.78952e+07	6.67673e+07	6.69898e+07	4.88505e+07	5.43218e+07	5.7117e+07	5.97705e+07	6.62311e+07	5.81473e+07	5.97883e+07	6.55653e+07	6.06743e+07	7.76543e+07	5.86088e+07	5.74502e+07	5.57556e+07
1693pos		DG(12:1e_24:2)+Na	DG(36:3e)+Na	DG	(12:1e_24:2)	(12:1e)	(24:2)			C39 H72 O4 Na1	627.532	566.838	0.0126428	1.09426	0.102037	0.859285	7.70958e+08	1.00351e+09	6.83255e+08	1.01664e+09	9.75908e+08	7.17161e+08	8.05093e+08	1.0407e+09	1.00333e+09	9.17132e+08	8.2196e+08	8.55593e+08	9.00931e+08	9.9098e+08	4.95059e+08	8.6761e+08	7.6944e+08	1.03747e+09	9.25977e+08	8.48721e+08	9.89102e+08	9.76549e+08	9.59113e+08	8.77511e+08	8.82802e+08	9.02257e+08	9.0258e+08
1695pos		DG(36:3e)+H	DG(36:3e)+H	DG	(36:3e)	(36:3e)				C39 H73 O4	605.55	628.533	0.0260219	1.2131	0.0784976	0.112934	5.46916e+07	3.00456e+07	5.17434e+07	4.68789e+07	4.40987e+07	3.16822e+07	4.03217e+07	3.68594e+07	3.62003e+07	3.97202e+07	5.2014e+07	3.09841e+07	3.26068e+07	4.01341e+07	5.10378e+07	4.29356e+07	4.58553e+07	5.44111e+07	3.53815e+07	5.69981e+07	4.3115e+07	4.39959e+07	4.60827e+07	4.36859e+07	3.63606e+07	3.83035e+07	3.73859e+07
169neg		Cer(d18:0_16:0)-H	Cer(d34:0)-H	Cer	(d18:0_16:0)	(d18:0)	(16:0)			C34 H68 O3 N1	538.52	663.659	0.0441904	0.811889	0.200741	0.181343	2.0921e+06	5.03678e+06	1.48119e+06	4.43177e+06	3.18052e+06	3.94039e+06	2.58812e+06	1.30477e+06	3.62081e+06	3.76067e+06	759445	5.14534e+06	3.73378e+06	3.29611e+06	2.09361e+06	2.92432e+06	2.54816e+06	3.04466e+06	4.66071e+06	3.77684e+06	4.84197e+06	3.97324e+06	3.98695e+06	3.68357e+06	3.55202e+06	3.50914e+06	3.26964e+06
1709pos		DG(36:3e)+Na	DG(36:3e)+Na	DG	(36:3e)	(36:3e)				C39 H72 O4 Na1	627.532	994.817	0.00473566	0.906083	0.489767	0.437204	5.53217e+07	5.20537e+07	4.84084e+07	3.30468e+07	4.92851e+07	7.67143e+07	1.82285e+06	5.56369e+07	7.55562e+07	4.62636e+07	2.49784e+07	6.09796e+07	5.89057e+07	7.19045e+07	2.94133e+07	6.25721e+07	4.67877e+07	6.91109e+07	6.88056e+07	4.54278e+07	4.87738e+07	2.68672e+07	6.15511e+07	5.84123e+07	4.0287e+07	4.06202e+07	4.06182e+07
170neg		Cer(d18:0_16:0)+HCOO	Cer(d34:0)+HCOO	Cer	(d18:0_16:0)	(d18:0)	(16:0)			C35 H70 O5 N1	584.526	663.659	0.0110328	0.869745	0.318185	0.72379	9.87181e+07	1.92908e+08	9.91413e+07	1.83375e+08	1.43053e+08	1.83329e+08	1.06221e+08	5.30871e+07	1.49186e+08	1.69988e+08	2.66929e+07	1.85993e+08	1.70087e+08	1.36705e+08	9.79579e+07	1.19211e+08	1.11707e+08	1.69283e+08	1.88553e+08	1.34107e+08	1.81556e+08	1.90106e+08	1.61136e+08	1.40181e+08	1.35784e+08	1.33208e+08	1.35788e+08
1732pos		DG(18:2_18:2)+NH4	DG(36:4)+NH4	DG	(18:2_18:2)	(18:2)	(18:2)			C39 H72 O5 N1	634.541	664.924	0.0456619	0.855022	0.769949	0.369269	7.76772e+08	1.20704e+07	4.45547e+08	2.00974e+08	1.32978e+08	1.15892e+08	4.86338e+08	7.62419e+07	2.8947e+07	3.85913e+07	7.6815e+08	2.14923e+07	4.65809e+06	1.28918e+08	4.86213e+08	1.04299e+07	2.23362e+08	3.34421e+07	2.18111e+07	8.09876e+07	5.90137e+07	1.11912e+08	7.86309e+06	7.44041e+07	1.21041e+08	1.21755e+08	1.31239e+08
1737pos		DG(18:2_18:2)+NH4	DG(36:4)+NH4	DG	(18:2_18:2)	(18:2)	(18:2)			C39 H72 O5 N1	634.541	711.05	0.0305659	0.965365	0.87749	0.20586	7.53187e+07	1.40678e+07	2.57995e+07	2.19429e+07	2.27926e+07	2.58747e+07	3.83704e+07	1.75455e+07	2.59099e+07	1.75347e+07	3.26229e+07	1.0065e+07	9.96316e+06	1.60035e+07	3.19973e+07	1.29557e+07	2.73941e+07	1.74836e+07	1.10574e+07	2.05834e+07	2.7607e+07	1.47176e+07	1.05635e+07	1.68151e+07	1.5265e+07	1.61063e+07	1.6099e+07
173pos		Cer(d30:0)+H	Cer(d30:0)+H	Cer	(d30:0)	(d30:0)				C30 H62 O3 N1	484.472	391.429	0.0643216	1.18106	0.671835	0.0365352	1.10843e+07	7.38289e+06	3.56329e+07	3.474e+07	4.04586e+07	4.54171e+07	2.6571e+07	3.98694e+07	1.98937e+07	2.55165e+07	3.73793e+07	7.00973e+06	8.49918e+06	1.67538e+07	8.15007e+06	2.64675e+07	3.22606e+07	5.52829e+07	1.83282e+07	2.33283e+07	1.41762e+07	1.64822e+07	3.58967e+07	4.31218e+07	2.78016e+07	2.49247e+07	2.49121e+07
1757pos		DG(18:2_18:2)+NH4	DG(36:4)+NH4	DG	(18:2_18:2)	(18:2)	(18:2)			C39 H72 O5 N1	634.541	959.11	0.0243808	1.09649	0.635517	0.311463	1.06272e+08	6.26388e+07	8.87058e+07	3.11127e+07	6.96644e+07	6.19527e+07	6.31261e+06	1.00019e+08	8.85862e+07	6.37227e+07	5.94998e+07	9.15029e+07	1.07694e+08	7.33397e+07	3.5734e+07	7.63644e+07	7.17105e+07	1.03302e+08	9.68495e+07	6.79231e+07	2.82473e+07	5.48252e+07	9.53104e+07	8.42635e+07	7.16339e+07	7.51977e+07	7.31623e+07
178neg		Cer(d18:1_16:0)-H	Cer(d34:1)-H	Cer	(d18:1_16:0)	(d18:1)	(16:0)			C34 H66 O3 N1	536.505	642.625	0.0143812	0.990913	0.961935	0.332294	1.7437e+07	2.04559e+07	1.49616e+07	3.01427e+07	1.70001e+07	1.75043e+07	1.99206e+07	4.58038e+06	1.96377e+07	1.64317e+07	5.17445e+06	1.57789e+07	1.67147e+07	2.26772e+07	1.57726e+07	1.38321e+07	1.83032e+07	2.22972e+07	2.15461e+07	1.63379e+07	2.85711e+07	1.82536e+07	1.73123e+07	1.82502e+07	1.59083e+07	1.55169e+07	1.55202e+07
1800pos		DG(36:4e)+H	DG(36:4e)+H	DG	(36:4e)	(36:4e)				C39 H71 O4	603.535	580.748	0.0150836	0.810345	0.158926	1.06574	1.7326e+08	1.39429e+08	1.59129e+08	1.38193e+08	2.47764e+08	1.46774e+08	1.18882e+08	1.80402e+08	1.80806e+08	2.19205e+08	1.47288e+08	1.39006e+08	1.29353e+08	1.36109e+08	1.12892e+08	1.4419e+08	1.54338e+08	1.41202e+08	1.54823e+08	1.71037e+08	1.05062e+08	1.3798e+08	1.54434e+08	1.43115e+08	1.48872e+08	1.52776e+08	1.52882e+08
1802pos		DG(36:4e)+Na	DG(36:4e)+Na	DG	(36:4e)	(36:4e)				C39 H70 O4 Na1	625.517	591.72	0.0290251	1.44893	0.00339743	0.292908	3.08387e+07	2.90357e+07	3.31645e+07	3.75797e+07	2.88084e+07	2.3549e+07	3.35585e+07	4.16286e+07	3.48345e+07	3.26444e+07	2.8203e+07	3.11428e+07	3.14515e+07	3.2618e+07	3.60833e+07	3.46854e+07	3.47396e+07	4.88601e+07	3.1596e+07	3.60477e+07	5.30088e+07	4.42435e+07	3.69445e+07	3.46414e+07	3.15778e+07	3.34397e+07	3.22683e+07
1805pos		DG(36:4e)+H	DG(36:4e)+H	DG	(36:4e)	(36:4e)				C39 H71 O4	603.535	665.94	0.032989	0.93032	0.483557	0.326997	4.54352e+07	2.79679e+07	4.61746e+07	2.81515e+07	4.17162e+07	2.6538e+07	3.01021e+07	2.58044e+07	3.02188e+07	3.51185e+07	3.42334e+07	3.41151e+07	3.0716e+07	2.72713e+07	2.95903e+07	2.5763e+07	4.65432e+07	2.75587e+07	2.61082e+07	3.09498e+07	3.08355e+07	3.71918e+07	2.61092e+07	3.53958e+07	2.66819e+07	2.72488e+07	2.84557e+07
180neg		Cer(d16:1_18:0)+HCOO	Cer(d34:1)+HCOO	Cer	(d16:1_18:0)	(d16:1)	(18:0)			C35 H68 O5 N1	582.51	642.42	0.00624445	0.922068	0.651035	1.82623	5.83809e+08	7.47935e+08	5.07351e+08	1.05805e+09	5.7613e+08	6.78103e+08	6.94628e+08	1.87617e+08	6.37818e+08	5.55886e+08	1.97389e+08	6.40219e+08	5.55419e+08	7.6116e+08	5.41605e+08	5.11988e+08	5.90833e+08	7.18951e+08	7.75969e+08	6.24549e+08	9.7153e+08	6.60118e+08	5.70886e+08	6.49162e+08	5.52704e+08	5.46525e+08	5.47047e+08
1816pos		DG(36:4e)+Na	DG(36:4e)+Na	DG	(36:4e)	(36:4e)				C39 H70 O4 Na1	625.517	932.938	0.0199756	0.803535	0.316791	0.368035	5.74228e+07	2.40275e+07	4.19005e+07	2.8508e+07	3.21469e+07	1.50671e+07	8.08978e+06	3.17143e+07	2.25986e+07	2.16391e+07	5.98531e+07	2.5786e+07	2.23837e+07	2.21996e+07	1.81856e+07	2.19682e+07	3.86841e+07	2.29992e+07	4.52003e+07	2.43753e+07	1.46085e+07	1.36204e+07	2.63468e+07	2.57185e+07	2.23887e+07	2.32656e+07	2.2619e+07
1820pos		DG(36:4e)+Na	DG(36:4e)+Na	DG	(36:4e)	(36:4e)				C39 H70 O4 Na1	625.517	955.02	0.0531766	0.945266	0.779358	0.624421	2.75213e+08	1.96355e+08	2.23039e+08	1.70813e+08	1.89412e+08	1.35651e+08	3.93711e+07	2.6533e+08	2.33866e+08	1.89321e+08	1.72748e+08	2.44641e+08	2.71674e+08	1.55429e+08	1.22055e+08	2.43695e+08	2.36777e+08	2.46267e+08	3.1234e+08	2.25069e+08	1.05917e+08	1.01288e+08	2.07856e+08	2.37864e+08	1.75894e+08	1.9288e+08	1.76403e+08
1821pos		DG(36:4e)+Na	DG(36:4e)+Na	DG	(36:4e)	(36:4e)				C39 H70 O4 Na1	625.517	961.621	0.026186	0.87261	0.373122	0.484509	7.60676e+07	6.22042e+07	9.11587e+07	6.46626e+07	6.0501e+07	4.21811e+07	2.04482e+07	6.68359e+07	6.2787e+07	5.87123e+07	5.96492e+07	6.85526e+07	6.36917e+07	5.69811e+07	3.44974e+07	6.16021e+07	7.16062e+07	6.98765e+07	8.08873e+07	6.64061e+07	4.08268e+07	2.80987e+07	5.61875e+07	7.74368e+07	4.89389e+07	5.12155e+07	4.89833e+07
1824pos		DG(36:4e)+Na	DG(36:4e)+Na	DG	(36:4e)	(36:4e)				C39 H70 O4 Na1	625.517	1003.8	0.0149434	0.764026	0.210042	0.339197	1.99903e+07	1.62938e+07	1.45352e+07	1.28714e+07	2.1826e+07	1.7272e+07	5.86171e+06	1.89177e+07	2.538e+07	1.92602e+07	1.29896e+07	1.86553e+07	2.11936e+07	1.77763e+07	7.99127e+06	1.77306e+07	1.331e+07	2.11662e+07	3.42501e+07	1.96709e+07	7.9326e+06	8.36099e+06	1.98859e+07	1.9747e+07	1.21719e+07	1.24995e+07	1.21919e+07
1825pos		DG(36:4e)+H	DG(36:4e)+H	DG	(36:4e)	(36:4e)				C39 H71 O4	603.535	1012.47	0.0337215	0.929821	0.618738	0.397998	5.54216e+07	3.70831e+07	4.13946e+07	6.03759e+07	4.09142e+07	4.56836e+07	2.90297e+07	5.18935e+07	5.00063e+07	3.79226e+07	2.63537e+07	4.20822e+07	3.57314e+07	5.95052e+07	3.44545e+07	4.32942e+07	5.70004e+06	4.6932e+07	4.67369e+07	4.17492e+07	5.12296e+07	1.96145e+07	2.74473e+07	5.10332e+07	3.19549e+07	3.38527e+07	3.19444e+07
1826pos		DG(36:4e)+H	DG(36:4e)+H	DG	(36:4e)	(36:4e)				C39 H71 O4	603.535	1035.58	0.00541103	2.40457	0.131261	0.503784	7.74117e+07	1.88144e+07	4.37368e+07	1.60441e+08	3.08564e+07	1.25682e+07	9.96751e+07	4.50818e+07	1.75698e+07	2.32772e+07	1.65559e+08	1.68112e+07	1.82167e+07	9.51899e+07	1.10467e+08	1.94803e+07	1.26417e+08	3.87142e+07	1.68729e+07	1.2385e+08	1.24687e+08	5.14999e+07	8.42626e+06	6.17597e+07	1.16306e+08	1.16845e+08	1.17567e+08
1827pos		DG(36:4e)+H	DG(36:4e)+H	DG	(36:4e)	(36:4e)				C39 H71 O4	603.535	1064.06	0.0598839	5.2705	0.118807	0.642534	5.77719e+07	3.55813e+06	2.06924e+07	3.64663e+08	1.7182e+07	5.73287e+06	3.28644e+08	3.45919e+07	8.94698e+06	1.2559e+07	1.53866e+08	4.31544e+06	8.24609e+06	1.11855e+08	1.14726e+08	3.63734e+06	1.33012e+08	3.03404e+07	8.37128e+06	1.39167e+08	1.47059e+08	4.88329e+07	3.51276e+06	3.99809e+07	1.01683e+08	1.01696e+08	1.12615e+08
1844pos		DG(36:5e)+Na	DG(36:5e)+Na	DG	(36:5e)	(36:5e)				C39 H68 O4 Na1	623.501	448.077	0.0133287	0.770978	0.0903348	0.233058	5.09738e+06	6.37074e+06	5.93015e+06	7.9081e+06	9.07077e+06	9.73269e+06	5.15418e+06	7.54531e+06	8.19656e+06	7.22224e+06	4.91538e+06	5.18394e+06	5.33977e+06	6.42953e+06	2.65175e+06	5.32267e+06	6.19732e+06	6.42532e+06	6.22838e+06	6.25489e+06	3.8128e+06	5.80171e+06	4.85067e+06	7.81771e+06	6.23798e+06	6.3848e+06	6.38368e+06
1845pos		DG(36:5e)+Na	DG(36:5e)+Na	DG	(36:5e)	(36:5e)				C39 H68 O4 Na1	623.501	479.863	0.0136541	1.14293	0.415185	0.0606155	1.45782e+07	1.38516e+07	8.66895e+06	1.86411e+07	1.56281e+07	2.54385e+07	6.88457e+06	2.32713e+07	3.24574e+07	1.00922e+07	9.9733e+06	1.1709e+07	1.74434e+07	1.5302e+07	4.03397e+06	1.31832e+07	1.63243e+07	1.7794e+07	1.48718e+07	2.06545e+07	1.3606e+07	1.69706e+07	1.55969e+07	2.13787e+07	1.47443e+07	1.50986e+07	1.50986e+07
1846pos		DG(36:5e)+Na	DG(36:5e)+Na	DG	(36:5e)	(36:5e)				C39 H68 O4 Na1	623.501	496.818	0.0306588	0.898591	0.653599	0.216975	9.15025e+06	1.33271e+07	1.45491e+07	1.57101e+07	1.42353e+07	1.88115e+07	8.43526e+06	2.4416e+07	2.16453e+07	6.38319e+06	1.60544e+07	2.80056e+07	1.37859e+07	1.39648e+07	7.7895e+06	1.41111e+07	2.30533e+07	1.47459e+07	1.7559e+07	1.53123e+07	9.31764e+06	1.2258e+07	1.38276e+07	2.62403e+07	1.20559e+07	1.14279e+07	1.20582e+07
1851pos		DG(36:5e)+Na	DG(36:5e)+Na	DG	(36:5e)	(36:5e)				C39 H68 O4 Na1	623.501	564.699	0.0198593	1.04764	0.553437	0.349679	1.24534e+08	7.04599e+07	1.26915e+08	8.72133e+07	1.01196e+08	8.18213e+07	5.01854e+07	9.53499e+07	1.09667e+08	8.2693e+07	1.06772e+08	6.41472e+07	8.73944e+07	8.93208e+07	7.03248e+07	1.09639e+08	1.1984e+08	8.3508e+07	9.09654e+07	1.04857e+08	7.20534e+07	8.5621e+07	9.07588e+07	1.05079e+08	8.40678e+07	8.701e+07	8.70445e+07
1854pos		DG(36:5e)+H	DG(36:5e)+H	DG	(36:5e)	(36:5e)				C39 H69 O4	601.519	720.637	0.018305	1.16604	0.707995	0.0699174	1.06209e+08	5.48535e+06	5.87376e+07	6.28423e+07	2.11116e+07	1.54697e+07	7.95108e+07	1.78009e+07	7.88785e+06	7.90761e+06	1.19387e+08	5.2574e+06	3.20454e+06	2.77828e+07	7.96832e+07	3.56435e+06	3.53707e+07	1.17633e+07	4.9726e+06	2.25475e+07	1.09744e+07	2.3718e+07	2.73937e+06	2.33773e+07	2.14875e+07	2.21944e+07	2.15246e+07
185pos		Cer(d32:0)+H	Cer(d32:0)+H	Cer	(d32:0)	(d32:0)				C32 H66 O3 N1	512.504	477.42	0.0165934	1.04276	0.882969	0.673079	4.82019e+08	3.12693e+08	8.31715e+08	7.86513e+08	9.75842e+08	9.93609e+08	6.53611e+08	7.91864e+08	7.07278e+08	9.59885e+08	9.01146e+08	3.05546e+08	3.13812e+08	6.3559e+08	3.72768e+08	6.62818e+08	8.10819e+08	1.38005e+09	6.71237e+08	8.76541e+08	5.31023e+08	6.18449e+08	7.63988e+08	8.80133e+08	6.43044e+08	6.61892e+08	6.61882e+08
1866pos		DG(36:5e)+Na	DG(36:5e)+Na	DG	(36:5e)	(36:5e)				C39 H68 O4 Na1	623.501	946.356	0.0143972	1.14483	0.427325	0.132368	5.63731e+07	4.26824e+07	4.48274e+07	5.07755e+07	4.87286e+07	3.39294e+07	1.21314e+07	6.75457e+07	6.22498e+07	4.20953e+07	5.62417e+07	5.36837e+07	6.83297e+07	4.14762e+07	2.42429e+07	4.38082e+07	5.06549e+07	7.07141e+07	8.11215e+07	5.46731e+07	3.93119e+07	4.16591e+07	5.84532e+07	5.12119e+07	4.00786e+07	4.11344e+07	4.01796e+07
1871pos		DG(36:5e)+H	DG(36:5e)+H	DG	(36:5e)	(36:5e)				C39 H69 O4	601.519	996.898	0.0257803	0.949986	0.679818	0.992746	4.87692e+08	3.13032e+08	3.62281e+08	2.88335e+08	3.72581e+08	3.76144e+08	9.84323e+07	4.34288e+08	4.57601e+08	3.46405e+08	2.82699e+08	3.98108e+08	3.87057e+08	4.37394e+08	2.56265e+08	4.09769e+08	3.70132e+08	4.39482e+08	4.46466e+08	3.49269e+08	3.47208e+08	1.71353e+08	3.6068e+08	4.2356e+08	2.73194e+08	2.85671e+08	2.73375e+08
1873pos		DG(36:5e)+H	DG(36:5e)+H	DG	(36:5e)	(36:5e)				C39 H69 O4	601.519	1030.96	0.00405389	2.82824	0.113626	0.79537	1.84349e+08	1.67359e+07	9.15974e+07	4.89464e+08	6.39068e+07	3.02226e+07	3.75405e+08	9.27238e+07	3.48134e+07	3.81808e+07	2.76573e+08	2.13761e+07	1.87055e+07	1.80276e+08	2.44913e+08	1.7078e+07	2.12602e+08	7.36483e+07	2.96139e+07	2.06412e+08	2.46482e+08	1.16574e+08	1.76176e+07	1.07641e+08	2.06454e+08	2.07919e+08	2.06477e+08
1877pos		DG(36:5e)+H	DG(36:5e)+H	DG	(36:5e)	(36:5e)				C39 H69 O4	601.519	1107	0.0185927	1.38567	0.149773	0.0818591	6.88976e+06	6.14751e+06	3.69513e+06	1.61865e+07	5.39117e+06	6.91207e+06	3.13146e+07	7.16908e+06	6.82692e+06	6.08298e+06	1.37505e+07	3.31205e+06	9.00914e+06	1.07221e+07	7.46769e+06	4.795e+06	6.91485e+06	6.62207e+06	4.3176e+06	1.60782e+07	1.24451e+07	4.92904e+06	4.39333e+06	9.23908e+06	8.12706e+06	8.13575e+06	7.87243e+06
1892pos		DG(36:6e)+H	DG(36:6e)+H	DG	(36:6e)	(36:6e)				C39 H67 O4	599.503	455.88	0.00522073	0.555992	0.0665867	0.264609	7.5587e+06	4.74543e+06	6.11506e+06	4.96872e+06	9.39426e+06	1.23172e+07	3.40875e+06	4.21896e+06	5.78705e+06	5.81537e+06	5.38054e+06	5.43328e+06	3.61265e+06	3.13441e+06	2.67014e+06	3.22286e+06	6.64392e+06	3.1955e+06	3.67794e+06	4.80895e+06	3.25238e+06	6.70893e+06	2.02047e+06	5.97325e+06	4.68402e+06	4.68438e+06	4.64197e+06
1894pos		DG(36:6e)+H	DG(36:6e)+H	DG	(36:6e)	(36:6e)				C39 H67 O4	599.503	486.42	0.00641376	1.26303	0.0916631	0.163054	3.18539e+07	1.9974e+07	3.31671e+07	3.32921e+07	2.63875e+07	3.04997e+07	1.05705e+07	3.93986e+07	4.88968e+07	3.04845e+07	1.9313e+07	2.34813e+07	3.10064e+07	3.68949e+07	1.4597e+07	3.5579e+07	3.61541e+07	4.58231e+07	3.8608e+07	2.85346e+07	2.52196e+07	3.89976e+07	3.3556e+07	5.60806e+07	2.66064e+07	2.68764e+07	2.69258e+07
1895pos		DG(36:6e)+H	DG(36:6e)+H	DG	(36:6e)	(36:6e)				C39 H67 O4	599.503	496.561	0.0028734	1.01388	0.927544	0.334863	6.57405e+07	6.24258e+07	5.70697e+07	9.2646e+07	1.07983e+08	1.33827e+08	7.17364e+07	1.09489e+08	1.12795e+08	1.04302e+08	6.8223e+07	5.61269e+07	8.14354e+07	7.93738e+07	5.95517e+07	7.91484e+07	8.56555e+07	8.30143e+07	8.20255e+07	1.02919e+08	1.13167e+08	8.68012e+07	8.03734e+07	9.85843e+07	8.39544e+07	8.43734e+07	8.39554e+07
1898pos		DG(36:6e)+H	DG(36:6e)+H	DG	(36:6e)	(36:6e)				C39 H67 O4	599.503	518.52	0.0147812	1.13595	0.254571	0.053538	1.67407e+07	1.64406e+07	1.64742e+07	2.14509e+07	2.05119e+07	2.7882e+07	1.37796e+07	2.64459e+07	2.37176e+07	1.97062e+07	1.67322e+07	1.38734e+07	2.11793e+07	1.90988e+07	1.44142e+07	1.96519e+07	1.90712e+07	2.19977e+07	2.27817e+07	2.44995e+07	2.28639e+07	2.56046e+07	1.95811e+07	2.41932e+07	1.84863e+07	1.84753e+07	1.89579e+07
1900pos		DG(36:6e)+H	DG(36:6e)+H	DG	(36:6e)	(36:6e)				C39 H67 O4	599.503	588.06	0.0804255	1.47295	0.0174942	0.265205	1.93997e+07	9.2587e+06	2.50854e+07	2.27828e+07	2.09022e+07	1.34156e+07	1.92567e+07	2.33787e+07	2.29072e+07	2.14157e+07	1.93617e+07	1.54284e+07	1.62757e+07	1.97785e+07	1.8264e+07	2.4566e+07	2.2625e+07	2.67889e+07	1.78953e+07	2.08548e+07	3.07593e+07	2.45528e+07	2.30593e+07	2.66766e+07	1.72305e+07	1.97555e+07	1.72443e+07
1912pos		DG(36:6e)+H	DG(36:6e)+H	DG	(36:6e)	(36:6e)				C39 H67 O4	599.503	952.802	0.0133627	1.08506	0.609027	1.61578	3.10422e+09	2.32181e+09	2.44416e+09	2.25816e+09	2.20135e+09	1.93431e+09	5.72941e+08	3.22647e+09	3.25299e+09	2.46579e+09	2.19977e+09	2.58285e+09	3.56744e+09	2.38632e+09	1.73583e+09	2.66847e+09	3.04106e+09	3.30223e+09	3.15173e+09	2.39509e+09	1.34704e+09	1.96255e+09	2.49889e+09	2.38157e+09	2.27719e+09	2.33006e+09	2.33137e+09
1913pos		DG(36:6e)+H	DG(36:6e)+H	DG	(36:6e)	(36:6e)				C39 H67 O4	599.503	984.78	0.0112337	1.0114	0.942815	1.11769	1.12003e+09	7.79366e+08	9.10383e+08	6.97696e+08	7.51612e+08	7.21683e+08	2.39704e+08	1.08886e+09	1.01061e+09	8.40545e+08	6.19747e+08	9.84459e+08	1.17164e+09	7.53903e+08	6.95988e+08	9.43831e+08	9.76552e+08	1.05272e+09	1.1043e+09	8.28602e+08	5.33752e+08	4.9776e+08	8.96302e+08	9.67301e+08	7.92657e+08	7.92633e+08	8.08169e+08
1933pos		DG(20:1_18:1)+NH4	DG(38:2)+NH4	DG	(20:1_18:1)	(20:1)	(18:1)			C41 H80 O5 N1	666.603	770.88	0.135624	0.415254	0.144965	0.170416	1.18314e+07	1.51604e+06	8.63255e+06	1.1267e+07	4.71537e+06	6.4035e+06	8.82431e+06	1.72333e+06	427713	3.16787e+06	1.28891e+07	897296	283088	4.99233e+06	7.84187e+06	616447	3.9948e+06	1.71393e+06	330008	6.20936e+06	610345	2.62168e+06	119443	2.99613e+06	2.89095e+06	2.29807e+06	2.97539e+06
1936pos		DG(20:1_18:1)+NH4	DG(38:2)+NH4	DG	(20:1_18:1)	(20:1)	(18:1)			C41 H80 O5 N1	666.603	829.618	0.0214344	0.643722	0.361501	0.19921	2.94379e+07	4.68916e+06	2.10738e+07	1.71155e+07	1.05816e+07	1.5285e+07	1.92429e+07	4.7843e+06	1.6232e+06	6.39327e+06	3.47925e+07	2.26165e+06	1.48351e+06	9.56485e+06	2.6535e+07	1.79076e+06	1.00634e+07	6.07086e+06	1.70572e+06	1.08721e+07	2.94238e+06	1.00061e+07	1.05166e+06	6.42576e+06	7.42218e+06	7.15488e+06	7.15172e+06
1946pos		DG(18:0_20:3)+Na	DG(38:3)+Na	DG	(18:0_20:3)	(18:0)	(20:3)			C41 H74 O5 Na1	669.543	780.84	0.0517663	0.989345	0.975198	0.157388	8.11902e+07	7.85239e+06	3.67337e+07	3.34791e+07	2.74074e+07	2.86515e+07	5.28523e+07	2.22282e+07	1.17973e+07	2.25836e+07	7.02394e+07	7.61213e+06	4.60263e+06	1.70079e+07	5.20776e+07	4.97688e+06	3.56671e+07	1.97626e+07	4.18392e+06	1.92582e+07	2.06596e+07	2.14844e+07	8.50619e+06	2.04932e+07	1.89423e+07	2.07251e+07	2.07713e+07
1947pos		DG(18:0_20:3)+NH4	DG(38:3)+NH4	DG	(18:0_20:3)	(18:0)	(20:3)			C41 H78 O5 N1	664.587	780.84	0.0661095	0.566953	0.254919	0.428248	1.13307e+08	1.13843e+07	5.67939e+07	5.06056e+07	3.74607e+07	5.80476e+07	7.42235e+07	1.78034e+07	6.6238e+06	2.57521e+07	1.00624e+08	1.29425e+07	3.41537e+06	2.46781e+07	6.55294e+07	5.12844e+06	4.36721e+07	1.81036e+07	4.52445e+06	2.52017e+07	1.02566e+07	2.85e+07	7.02725e+06	2.04063e+07	2.12365e+07	2.38052e+07	2.13103e+07
195neg		Cer(d34:1+O)+HCOO	Cer(d34:1+O)+HCOO	Cer	(d18:1_16:0+O)	(d18:1)	(16:0+O)			C35 H68 O6 N1	598.505	605.76	0.00615219	1.3401	0.492653	0.748155	1.0814e+07	1.13966e+07	8.04232e+06	2.68257e+07	1.16232e+07	1.29312e+07	3.40052e+07	3.50149e+06	1.54285e+07	1.16781e+07	3.53137e+06	1.12952e+07	9.99187e+06	1.86789e+07	1.72368e+07	1.05485e+07	1.24783e+07	1.55379e+07	1.07241e+07	1.41136e+07	4.20063e+07	1.26601e+07	9.6383e+06	1.17996e+07	1.32097e+07	1.30615e+07	1.31921e+07
1963pos		DG(18:0_20:4)+NH4	DG(38:4)+NH4	DG	(18:0_20:4)	(18:0)	(20:4)			C41 H76 O5 N1	662.572	734.297	0.0739617	1.22161	0.594747	0.0622091	5.89379e+07	7.16722e+06	2.54597e+07	2.52703e+07	2.3289e+07	1.62432e+07	2.66652e+07	1.24278e+07	7.01077e+06	1.22862e+07	4.52428e+07	4.38667e+06	1.19421e+07	1.06776e+07	3.67598e+07	5.80705e+06	1.85638e+07	1.35143e+07	5.80479e+06	1.55862e+07	9.65229e+06	3.111e+07	5.86069e+06	2.03776e+07	1.19057e+07	1.36214e+07	1.21468e+07
196pos		Cer(d17:1_16:0)+H	Cer(d33:1)+H	Cer	(d17:1_16:0)	(d17:1)	(16:0)			C33 H66 O3 N1	524.504	607.966	0.0856897	1.25234	0.171722	0.0607223	1.28711e+07	9.94363e+06	1.46888e+07	1.86991e+07	1.33566e+07	9.47577e+06	1.54125e+07	2.49964e+07	1.67315e+07	1.57845e+07	1.82844e+07	1.41571e+07	1.2627e+07	2.1152e+07	1.36785e+07	1.36764e+07	1.17247e+07	1.40892e+07	1.96915e+07	1.44712e+07	1.83022e+07	1.61308e+07	1.70588e+07	2.37796e+07	1.17826e+07	1.20102e+07	1.37429e+07
197pos		Cer(d33:1)+H-H2O	Cer(d33:1)+H-H2O	Cer	(d17:1_16:0)	(d17:1)	(16:0)			C33 H64 O2 N1	506.493	607.966	0.0405759	1.35033	0.0799623	0.124141	1.89707e+07	1.20316e+07	1.7781e+07	3.04584e+07	1.64315e+07	1.11163e+07	1.78412e+07	3.25304e+07	2.25471e+07	1.75169e+07	1.76123e+07	1.70867e+07	1.63573e+07	2.80152e+07	1.39456e+07	1.55527e+07	1.85823e+07	1.73166e+07	1.83629e+07	1.62732e+07	2.20267e+07	1.9104e+07	1.76325e+07	2.22027e+07	1.507e+07	1.63278e+07	1.5902e+07
1988pos		DG(38:4e)+Na	DG(38:4e)+Na	DG	(38:4e)	(38:4e)				C41 H74 O4 Na1	653.548	677.28	0.0324883	1.27088	0.227212	0.214135	3.55171e+07	4.53867e+07	2.63798e+07	6.49289e+07	8.39224e+07	5.28774e+07	6.90649e+06	8.36179e+07	8.37328e+07	5.18071e+07	2.31626e+07	4.90557e+07	6.12962e+07	5.77212e+07	1.60028e+07	8.41798e+07	3.74217e+07	1.1232e+08	9.89702e+07	1.05469e+08	4.73703e+07	7.9408e+07	1.01487e+08	1.04796e+08	4.7676e+07	5.08777e+07	4.92717e+07
198pos		Cer(d15:2_18:2+2O)+H	Cer(d33:4+2O)+H	Cer	(d15:2_18:2+2O)	(d15:2)	(18:2+2O)			C33 H60 O5 N1	550.447	134.4	0.0102371	0.610999	0.121677	0.298922	2.1048e+06	1.44845e+07	5.59208e+06	6.99733e+06	5.53607e+06	1.10509e+07	7.3162e+06	9.84721e+06	4.21162e+06	7.50109e+06	8.34629e+06	1.30015e+07	1.58948e+06	3.71958e+06	1.22504e+07	1.23018e+07	4.28134e+06	5.15487e+06	6.67586e+06	7.28691e+06	2.94256e+06	4.14577e+06	1.19108e+07	5.80772e+06	5.43258e+06	5.51313e+06	5.54089e+06
1995pos		DG(38:4e)+H	DG(38:4e)+H	DG	(38:4e)	(38:4e)				C41 H75 O4	631.566	1065.93	0.00765885	5.25187	0.0962927	0.362	3.60513e+07	1.36492e+06	9.42229e+06	9.54018e+07	6.31696e+06	2.32305e+06	7.7096e+07	1.06671e+07	2.51815e+06	3.0204e+06	5.69562e+07	982004	1.60658e+06	2.82756e+07	3.69124e+07	1.46987e+06	4.35884e+07	1.03045e+07	1.93966e+06	4.12324e+07	4.22705e+07	1.65049e+07	2.39809e+06	1.22482e+07	3.25455e+07	3.29268e+07	3.30201e+07
199pos		Cer(d33:4+O)+H	Cer(d33:4+O)+H	Cer	(d33:4+O)	(d33:4+O)				C33 H60 O4 N1	534.452	134.264	0.00311176	1.09633	0.760519	0.0716378	1.61237e+07	9.44605e+06	3.0627e+07	3.20112e+07	3.72478e+07	4.34124e+07	6.18e+06	3.37024e+07	2.86375e+07	2.92808e+07	3.44536e+07	7.64881e+06	1.09237e+07	2.46607e+07	6.56062e+06	2.82604e+07	3.30016e+07	4.62236e+07	2.62749e+07	3.61774e+07	1.76638e+07	2.57411e+07	3.3825e+07	3.78631e+07	2.43451e+07	2.44765e+07	2.43449e+07
19neg		CL(68:4)-2H	CL(68:4)-2H	CL	(68:4)	(68:4)				C77 H140 O17 P2	699.479	539.76	0.0359437	1.81571	0.0919939	0.894186	3.63987e+06	5.52107e+06	2.3651e+06	6.76024e+06	5.84582e+06	6.70338e+06	1.34301e+07	1.12468e+07	8.957e+06	5.07923e+06	7.69574e+06	5.36628e+06	5.89013e+06	8.5319e+06	7.0707e+06	5.399e+06	5.5391e+06	5.36485e+06	4.69645e+06	7.29082e+06	2.07817e+07	5.94712e+06	1.10731e+07	8.72643e+06	7.45225e+06	7.91809e+06	7.43763e+06
2003pos		DG(18:1_20:4)+NH4	DG(38:5)+NH4	DG	(18:1_20:4)	(18:1)	(20:4)			C41 H74 O5 N1	660.556	708.492	0.0326496	1.04528	0.873807	0.213466	1.41163e+08	2.20022e+07	5.70913e+07	4.11731e+07	5.19896e+07	3.90742e+07	9.27895e+07	3.43932e+07	2.55785e+07	3.55333e+07	1.19496e+08	1.47438e+07	1.25288e+07	2.19141e+07	8.97254e+07	1.33178e+07	3.35214e+07	5.03129e+07	1.87354e+07	3.94668e+07	4.14514e+07	3.65127e+07	1.51244e+07	3.62223e+07	2.98804e+07	3.12469e+07	3.18566e+07
2011pos		DG(38:5e)+Na	DG(38:5e)+Na	DG	(38:5e)	(38:5e)				C41 H72 O4 Na1	651.532	553.937	0.201246	1.09381	0.681577	0.200129	1.02589e+08	6.34183e+07	5.97424e+07	9.75738e+07	8.45001e+07	4.27638e+07	2.13368e+07	6.39785e+07	5.13157e+07	3.03737e+07	8.35799e+07	6.18218e+07	6.80143e+07	1.05129e+08	6.5207e+07	6.01738e+07	7.06231e+07	8.6539e+07	9.93898e+07	7.3697e+07	2.77618e+07	7.75726e+07	9.42609e+07	8.35017e+07	7.2518e+07	7.22554e+07	4.97825e+07
2019pos		DG(38:5e)+H	DG(38:5e)+H	DG	(38:5e)	(38:5e)				C41 H73 O4	629.55	1000.61	0.0119763	1.09293	0.572501	0.136439	2.7621e+07	1.65226e+07	2.10008e+07	8.23675e+06	2.12855e+07	2.85161e+07	643670	2.33455e+07	2.53201e+07	1.72556e+07	7.07426e+06	2.01638e+07	2.49397e+07	2.17322e+07	1.57235e+07	2.39693e+07	1.38937e+07	3.30012e+07	1.95895e+07	1.62762e+07	1.60739e+07	1.41031e+07	2.33314e+07	2.40495e+07	1.29345e+07	1.29528e+07	1.32136e+07
201pos		Cer(d34:0)+H	Cer(d34:0)+H	Cer	(d34:0)	(d34:0)				C34 H70 O3 N1	540.535	578.526	0.0188432	1.31659	0.159322	0.254513	1.06462e+08	9.7514e+07	1.40047e+08	1.79578e+08	1.40118e+08	7.44817e+07	2.1649e+08	1.36674e+08	1.84772e+08	1.69672e+08	1.67289e+08	1.33874e+08	9.36156e+07	2.32228e+08	1.3727e+08	1.36576e+08	1.38753e+08	2.50671e+08	1.48706e+08	2.34284e+08	2.05182e+08	1.52659e+08	1.67557e+08	1.67273e+08	1.37578e+08	1.42146e+08	1.42191e+08
2023pos		DG(16:0_22:6)+NH4	DG(38:6)+NH4	DG	(16:0_22:6)	(16:0)	(22:6)			C41 H72 O5 N1	658.541	673.956	0.0616387	1.0623	0.711451	0.288562	3.05952e+08	3.68595e+07	1.99496e+08	5.33132e+07	6.41799e+07	5.10345e+07	1.88215e+08	6.47414e+07	6.55428e+07	5.47102e+07	2.95623e+08	3.21824e+07	2.63848e+07	6.85778e+07	2.53548e+08	4.43817e+07	6.08412e+07	5.74453e+07	4.05064e+07	4.28063e+07	6.0367e+07	4.34477e+07	4.44977e+07	6.66993e+07	4.94195e+07	5.59104e+07	5.26313e+07
202pos		Cer(d18:0_16:0)+H	Cer(d34:0)+H	Cer	(d18:0_16:0)	(d18:0)	(16:0)			C34 H70 O3 N1	540.535	672.997	0.0376835	1.2062	0.155397	0.060418	4.24144e+07	3.93748e+07	4.75438e+07	6.95786e+07	5.3833e+07	4.62187e+07	6.44938e+07	6.92861e+07	5.07464e+07	7.34691e+07	5.23677e+07	5.41688e+07	5.00872e+07	6.96195e+07	4.5146e+07	4.73144e+07	4.9333e+07	6.51767e+07	7.24337e+07	4.94768e+07	8.69031e+07	7.5604e+07	6.2444e+07	5.25055e+07	4.46051e+07	4.76384e+07	4.76593e+07
2033pos		DG(38:6e)+Na	DG(38:6e)+Na	DG	(38:6e)	(38:6e)				C41 H70 O4 Na1	649.517	569.596	0.0679287	1.14663	0.368505	0.0724835	7.63331e+07	3.90048e+07	8.86404e+07	5.87861e+07	5.41028e+07	3.14234e+07	4.0227e+07	5.79891e+07	5.61876e+07	5.11382e+07	7.50648e+07	3.95449e+07	4.38354e+07	6.70283e+07	4.91659e+07	5.53239e+07	9.10544e+07	6.95042e+07	6.97046e+07	6.05638e+07	3.74162e+07	6.15474e+07	5.64049e+07	7.31403e+07	5.36571e+07	6.04808e+07	6.0534e+07
2036pos		DG(38:6e)+H	DG(38:6e)+H	DG	(38:6e)	(38:6e)				C41 H71 O4	627.535	661.117	0.0839398	1.14021	0.0812739	0.25094	1.34999e+08	1.6031e+08	1.36047e+08	1.48279e+08	1.48096e+08	1.43143e+08	8.13999e+07	1.79495e+08	1.58248e+08	1.34649e+08	1.39512e+08	1.2471e+08	1.32771e+08	1.36805e+08	1.29417e+08	1.63984e+08	1.29452e+08	1.82589e+08	1.53044e+08	1.56397e+08	1.39803e+08	1.79166e+08	1.71265e+08	1.90705e+08	1.22452e+08	1.42449e+08	1.24905e+08
2038pos		DG(38:6e)+H	DG(38:6e)+H	DG	(38:6e)	(38:6e)				C41 H71 O4	627.535	737.832	0.059819	0.943305	0.66315	0.276911	3.00836e+07	3.06044e+07	2.12137e+07	3.06825e+07	3.06667e+07	3.36941e+07	5.09807e+07	3.29877e+07	3.52363e+07	2.66222e+07	3.02044e+07	2.57466e+07	3.70783e+07	1.37578e+07	1.81354e+07	1.90317e+07	3.49055e+07	2.81631e+07	2.26466e+07	2.06425e+07	1.56107e+07	2.14049e+07	2.5099e+07	4.02e+07	1.90451e+07	2.115e+07	2.11793e+07
2046pos		DG(38:6e)+H	DG(38:6e)+H	DG	(38:6e)	(38:6e)				C41 H71 O4	627.535	963.516	0.0104715	0.990195	0.941601	0.459156	1.42531e+08	9.77455e+07	1.04987e+08	9.12593e+07	1.13441e+08	9.8519e+07	2.02743e+07	1.08643e+08	1.35951e+08	9.65116e+07	6.47941e+07	1.25462e+08	1.37955e+08	9.14779e+07	6.34854e+07	1.01279e+08	1.08815e+08	1.40109e+08	1.31372e+08	1.06984e+08	7.66826e+07	6.56523e+07	1.27509e+08	1.14039e+08	9.48985e+07	9.66258e+07	9.66552e+07
2047pos		DG(38:6e)+Na	DG(38:6e)+Na	DG	(38:6e)	(38:6e)				C41 H70 O4 Na1	649.517	963.516	0.0185345	1.01687	0.937382	0.251263	5.45155e+07	5.66929e+07	4.42668e+07	5.21433e+07	6.38291e+07	3.50516e+07	1.73327e+07	8.02645e+07	6.97661e+07	4.90345e+07	4.25872e+07	5.14009e+07	6.00194e+07	5.18681e+07	2.50881e+07	5.51191e+07	4.56897e+07	8.5373e+07	9.41892e+07	7.21064e+07	5.16566e+07	2.33144e+07	5.54788e+07	6.10507e+07	5.13839e+07	5.30571e+07	5.13951e+07
204neg		Cer(d15:0_21:0)+HCOO	Cer(d36:0)+HCOO	Cer	(d15:0_21:0)	(d15:0)	(21:0)			C37 H74 O5 N1	612.557	747.36	0.016342	0.98197	0.909595	0.108281	7.56557e+06	1.46218e+07	8.86393e+06	1.23947e+07	1.00574e+07	1.11733e+07	5.70039e+06	3.95311e+06	1.19069e+07	8.64533e+06	2.1811e+06	1.20646e+07	1.21464e+07	1.09333e+07	6.61426e+06	1.01968e+07	7.99141e+06	1.37394e+07	1.39581e+07	1.13063e+07	1.17794e+07	1.40308e+07	1.36e+07	1.12166e+07	7.75922e+06	7.76899e+06	7.9858e+06
2057pos		DG(38:7e)+H	DG(38:7e)+H	DG	(38:7e)	(38:7e)				C41 H69 O4	625.519	496.98	0.0179898	1.20184	0.169559	0.13835	1.01323e+08	5.98134e+07	7.36631e+07	8.50232e+07	9.49357e+07	1.08377e+08	4.94796e+07	1.19841e+08	1.09039e+08	7.80667e+07	7.41706e+07	4.98112e+07	9.26535e+07	7.56266e+07	3.73497e+07	7.65958e+07	8.26994e+07	9.40979e+07	8.15854e+07	1.05858e+08	8.35195e+07	1.00913e+08	7.69514e+07	1.01077e+08	7.92878e+07	7.92992e+07	8.17901e+07
2058pos		DG(38:7e)+H	DG(38:7e)+H	DG	(38:7e)	(38:7e)				C41 H69 O4	625.519	523.674	0.0238581	0.759291	0.366944	0.280123	2.37381e+07	2.1166e+07	1.67887e+07	3.15989e+07	3.20979e+07	3.89626e+07	1.87476e+07	1.07355e+07	3.59566e+07	1.06516e+07	2.34996e+07	7.13795e+06	2.2083e+07	2.40295e+07	1.36311e+07	2.72724e+07	2.02208e+07	1.14162e+07	2.64222e+07	3.11317e+07	2.47852e+07	1.0447e+07	2.41295e+07	3.17005e+07	2.3424e+07	2.30327e+07	2.41398e+07
2061pos		DG(38:7e)+Na	DG(38:7e)+Na	DG	(38:7e)	(38:7e)				C41 H68 O4 Na1	647.501	933.268	0.0130449	0.872597	0.496188	1.01027	7.66605e+08	2.27787e+08	5.06046e+08	2.60608e+08	3.29462e+08	1.96727e+08	7.1483e+07	3.93766e+08	3.52921e+08	2.87437e+08	7.02857e+08	3.18202e+08	3.05107e+08	2.76421e+08	2.77456e+08	2.8901e+08	4.8995e+08	2.91805e+08	5.12359e+08	3.03662e+08	1.59261e+08	2.04888e+08	2.78652e+08	2.93086e+08	2.8986e+08	2.91928e+08	2.97268e+08
2062pos		DG(38:7e)+Na	DG(38:7e)+Na	DG	(38:7e)	(38:7e)				C41 H68 O4 Na1	647.501	961.697	0.0319983	0.830135	0.303146	0.662209	1.80434e+08	6.79648e+07	1.3286e+08	1.01144e+08	9.28017e+07	5.54037e+07	4.32593e+07	8.63045e+07	8.30838e+07	8.1e+07	1.71123e+08	8.67338e+07	7.49476e+07	9.25857e+07	7.33952e+07	7.69655e+07	1.33554e+08	8.11602e+07	1.36254e+08	7.68164e+07	8.39806e+07	3.72222e+07	6.81863e+07	8.29292e+07	8.22958e+07	8.6986e+07	8.2379e+07
2071pos		DG(38:8e)+Na	DG(38:8e)+Na	DG	(38:8e)	(38:8e)				C41 H66 O4 Na1	645.485	930.933	0.0455121	1.13315	0.395834	0.243523	1.25831e+08	9.37577e+07	9.36544e+07	9.73491e+07	7.13892e+07	7.61284e+07	4.02106e+07	1.28114e+08	1.06484e+08	9.96391e+07	1.04369e+08	1.04908e+08	1.37056e+08	7.89607e+07	7.2104e+07	9.38297e+07	1.28424e+08	1.33513e+08	1.40008e+08	9.22424e+07	7.18383e+07	9.70901e+07	9.62198e+07	1.01882e+08	9.10145e+07	9.85703e+07	9.1374e+07
2072pos		DG(38:8e)+H	DG(38:8e)+H	DG	(38:8e)	(38:8e)				C41 H67 O4	623.503	966.029	0.00860273	1.12838	0.409269	0.0737667	2.43543e+07	1.96414e+07	3.16484e+07	3.43305e+07	2.33109e+07	1.37237e+07	1.12479e+07	3.00022e+07	2.72708e+07	1.86624e+07	2.53627e+07	2.59181e+07	2.36241e+07	2.73428e+07	1.21169e+07	1.95519e+07	2.27722e+07	2.77643e+07	3.24542e+07	2.12891e+07	3.01806e+07	1.87858e+07	2.05193e+07	2.55371e+07	2.17034e+07	2.20296e+07	2.20305e+07
2077pos		DG(18:0_22:5)+NH4	DG(40:5)+NH4	DG	(18:0_22:5)	(18:0)	(22:5)			C43 H78 O5 N1	688.587	749.185	0.141605	0.851979	0.451729	0.323418	1.0229e+08	1.93777e+07	4.16582e+07	1.81011e+07	2.03466e+07	1.97739e+07	2.72933e+07	2.42856e+07	7.36589e+06	1.72462e+07	6.87918e+07	1.08857e+07	5.09998e+06	9.06312e+06	5.53899e+07	4.78543e+06	1.6629e+07	8.57272e+06	1.55956e+07	2.21587e+07	1.85747e+07	1.84395e+07	1.29735e+07	1.88011e+07	1.67223e+07	2.15804e+07	1.74069e+07
2078pos		DG(18:0_22:5)+Na	DG(40:5)+Na	DG	(18:0_22:5)	(18:0)	(22:5)			C43 H74 O5 Na1	693.543	749.185	0.0763742	0.922602	0.666344	0.204324	6.21535e+07	9.79468e+06	2.4429e+07	1.13592e+07	1.17751e+07	8.02348e+06	1.87459e+07	8.34782e+06	9.59912e+06	1.14651e+07	4.95724e+07	5.34601e+06	3.54176e+06	4.56628e+06	4.87249e+07	3.98413e+06	1.2155e+07	1.26427e+07	1.03187e+07	5.63587e+06	9.23065e+06	1.13991e+07	7.1708e+06	1.10611e+07	1.13796e+07	1.32184e+07	1.27121e+07
2079pos		DG(40:5)+NH4	DG(40:5)+NH4	DG	(40:5)	(40:5)				C43 H78 O5 N1	688.587	791.305	0.0668546	0.982774	0.875284	0.242492	5.68651e+07	2.00072e+07	2.00713e+07	2.09906e+07	1.52986e+07	2.39878e+07	4.7924e+07	2.47476e+07	1.6763e+07	2.62377e+07	5.3251e+07	1.82226e+07	1.53844e+07	1.60088e+07	4.57061e+07	1.32207e+07	1.65151e+07	2.00607e+07	1.86248e+07	1.9468e+07	2.01216e+07	2.29745e+07	1.69818e+07	2.08593e+07	1.62998e+07	1.81219e+07	1.85085e+07
207neg		Cer(d36:0+O)+HCOO	Cer(d36:0+O)+HCOO	Cer	(d36:0+O)	(d36:0+O)				C37 H74 O6 N1	628.552	672.959	0.0169823	0.994938	0.974321	0.238597	6.64091e+06	1.27081e+07	6.70181e+06	1.45184e+07	1.1161e+07	1.2576e+07	1.00692e+07	4.17983e+06	1.24578e+07	9.56792e+06	2.32854e+06	1.14793e+07	1.1513e+07	1.42023e+07	7.943e+06	1.08583e+07	8.25554e+06	1.40917e+07	1.48333e+07	1.04739e+07	1.62092e+07	1.38188e+07	1.21469e+07	1.24494e+07	6.66627e+06	6.86131e+06	6.6606e+06
2085pos		DG(18:0_22:6)+Na	DG(40:6)+Na	DG	(18:0_22:6)	(18:0)	(22:6)			C43 H72 O5 Na1	691.527	744.521	0.081633	1.07478	0.35812	0.202349	1.06216e+08	2.85387e+07	4.08866e+07	4.28301e+07	4.17777e+07	3.52525e+07	4.634e+07	3.79998e+07	4.38985e+07	4.1312e+07	9.91343e+07	3.84767e+07	3.37319e+07	4.65728e+07	8.79358e+07	3.25515e+07	6.43441e+07	4.19373e+07	4.03178e+07	3.2166e+07	4.88452e+07	4.15306e+07	3.85066e+07	4.04149e+07	3.55527e+07	4.12518e+07	4.09392e+07
209neg		Cer(d18:1_18:0)-H	Cer(d36:1)-H	Cer	(d18:1_18:0)	(d18:1)	(18:0)			C36 H70 O3 N1	564.536	716.243	0.00799535	0.991145	0.95837	0.268718	2.97259e+07	3.38097e+07	2.66006e+07	4.16914e+07	2.78815e+07	2.65314e+07	3.81906e+07	9.09946e+06	3.17378e+07	2.35812e+07	1.10153e+07	3.22849e+07	3.31345e+07	3.81067e+07	2.78365e+07	2.6868e+07	2.88698e+07	3.58327e+07	3.8106e+07	2.34082e+07	4.03917e+07	2.75975e+07	3.45255e+07	2.85609e+07	2.6079e+07	2.57207e+07	2.57216e+07
20pos		AcCa(16:1)+H	AcCa(16:1)+H	AcCa	(16:1)	(16:1)				C23 H44 O4 N1	398.326	83.4	0.0460006	1.86459	0.141796	0.428828	4.26347e+07	2.97773e+06	5.92486e+07	8.81055e+07	3.20052e+07	3.58398e+07	1.09553e+08	8.21736e+07	1.01993e+08	1.75904e+07	1.01698e+08	7.65886e+06	1.84337e+07	5.39108e+07	2.76811e+07	5.20889e+07	7.03566e+07	7.06348e+07	4.85186e+07	3.36676e+07	3.19302e+07	4.68228e+07	1.96071e+07	1.22747e+08	5.98549e+07	5.97612e+07	6.47026e+07
2103pos		DG(40:6e)+H	DG(40:6e)+H	DG	(40:6e)	(40:6e)				C43 H75 O4	655.566	817.104	0.0445237	1.25262	0.0966092	0.129381	5.90567e+06	1.15545e+07	3.61264e+06	6.87945e+07	7.96963e+06	1.50818e+07	2.74653e+08	1.49911e+07	1.1383e+07	1.40646e+07	3.2556e+07	1.05463e+07	1.94237e+07	7.81109e+06	4.02503e+06	1.10588e+07	2.51188e+07	1.28006e+07	9.97315e+06	1.38739e+07	1.5315e+07	1.14452e+07	1.26927e+07	1.82628e+07	1.35917e+07	1.46832e+07	1.47096e+07
2105pos		DG(22:5_18:2)+NH4	DG(40:7)+NH4	DG	(22:5_18:2)	(22:5)	(18:2)			C43 H74 O5 N1	684.556	342.24	0.00699733	1.63723	0.0823856	0.1494	3.68798e+06	3.37365e+06	7.93247e+06	7.70359e+06	6.53799e+06	7.38424e+06	5.98741e+06	7.14052e+06	9.56767e+06	4.63125e+06	3.82371e+06	2.51471e+06	3.02287e+06	6.66635e+06	3.9504e+06	6.51583e+06	8.31868e+06	6.3972e+06	5.21205e+06	1.58592e+07	1.23977e+07	7.67441e+06	1.19176e+07	1.86562e+07	8.82549e+06	8.93433e+06	8.8284e+06
2110pos		DG(18:1_22:6)+NH4	DG(40:7)+NH4	DG	(18:1_22:6)	(18:1)	(22:6)			C43 H74 O5 N1	684.556	687.9	0.0567143	0.656168	0.0650186	0.723599	6.79853e+08	6.29598e+07	2.93397e+08	7.61277e+07	7.45386e+07	5.93951e+07	2.13035e+08	4.04481e+07	3.89223e+07	4.91986e+07	5.42292e+08	2.26873e+07	1.26614e+07	4.57529e+07	4.72702e+08	2.03504e+07	8.99925e+07	3.93417e+07	4.23714e+07	3.45009e+07	3.99219e+07	3.81933e+07	3.36007e+07	8.73722e+07	7.80479e+07	8.62016e+07	8.63014e+07
2125pos		DG(40:7e)+H	DG(40:7e)+H	DG	(40:7e)	(40:7e)				C43 H73 O4	653.55	570.392	0.0190709	1.06305	0.574955	0.127047	1.05537e+07	1.81121e+07	6.27558e+06	7.47682e+06	1.61229e+07	1.26982e+07	9.84156e+06	2.01718e+07	1.74987e+07	1.40644e+07	1.29257e+07	1.22515e+07	1.44079e+07	2.04924e+07	4.45411e+06	1.30206e+07	5.70699e+06	1.77713e+07	1.66038e+07	1.1093e+07	1.07928e+07	1.72212e+07	1.51535e+07	1.33123e+07	1.2783e+07	1.32146e+07	1.2792e+07
2126pos		DG(40:7e)+H	DG(40:7e)+H	DG	(40:7e)	(40:7e)				C43 H73 O4	653.55	741.929	0.0300264	0.882179	0.296163	0.191254	8.10831e+06	7.37087e+06	4.84706e+06	2.9653e+07	5.95409e+06	5.47881e+06	1.60424e+08	8.09521e+06	6.86744e+06	6.90464e+06	1.22546e+07	6.5751e+06	5.10979e+06	3.44987e+06	4.14315e+06	3.95689e+06	1.55071e+07	7.31943e+06	8.31844e+06	1.0347e+07	5.89965e+06	5.03224e+06	4.36188e+06	9.1028e+06	4.67017e+06	4.92119e+06	4.92235e+06
2130pos		DG(40:8)+H	DG(40:8)+H	DG	(40:8)	(40:8)				C43 H69 O5	665.514	934.175	0.0155159	0.927562	0.650584	0.0847741	6.26838e+06	2.57238e+06	5.01533e+06	2.69943e+06	3.70371e+06	1.82377e+06	169251	3.60125e+06	2.94125e+06	2.31536e+06	5.51218e+06	2.86203e+06	2.80588e+06	2.35166e+06	2.32031e+06	2.43644e+06	3.03626e+06	2.61798e+06	3.63674e+06	2.54522e+06	1.653e+06	1.79058e+06	3.22009e+06	2.34415e+06	2.39182e+06	2.39904e+06	2.46008e+06
2133pos		DG(40:8e)+H	DG(40:8e)+H	DG	(40:8e)	(40:8e)				C43 H71 O4	651.535	639.572	0.032922	0.966011	0.707653	0.694519	2.13267e+08	1.2848e+08	2.17293e+08	1.61576e+08	1.74093e+08	1.45604e+08	9.91882e+07	1.73753e+08	1.6972e+08	1.62177e+08	1.81212e+08	1.62294e+08	1.39507e+08	1.49899e+08	1.59445e+08	1.57878e+08	2.11946e+08	1.5772e+08	1.50497e+08	1.85332e+08	9.52317e+07	1.53109e+08	1.72448e+08	2.00179e+08	1.48485e+08	1.4949e+08	1.57603e+08
2144pos		DG(42:6e)+H	DG(42:6e)+H	DG	(42:6e)	(42:6e)				C45 H79 O4	683.597	875.28	0.0376136	1.95459	0.055934	0.259269	2.38792e+06	5.71648e+06	1.41595e+06	2.28899e+08	5.7486e+06	8.73651e+06	7.58883e+08	1.02909e+07	8.94473e+06	1.0752e+07	9.74577e+07	6.66214e+06	1.60026e+07	6.82454e+06	5.13128e+06	7.26472e+06	6.42202e+07	1.09818e+07	4.75492e+06	3.39684e+07	2.76626e+07	9.86978e+06	8.00949e+06	1.59063e+07	3.26171e+07	3.49188e+07	3.28835e+07
2145pos		DG(42:7)+NH4	DG(42:7)+NH4	DG	(42:7)	(42:7)				C45 H78 O5 N1	712.587	744.531	0.0668535	0.46109	0.0690194	0.340902	7.42595e+07	9.41489e+06	2.11837e+07	4.62685e+06	1.25562e+07	1.90801e+07	1.38762e+07	6.98732e+06	5.08539e+06	7.75263e+06	3.2145e+07	5.45119e+06	2.40652e+06	1.61225e+06	4.11496e+07	1.96382e+06	6.87295e+06	8.387e+06	3.31797e+06	6.3395e+06	3.1098e+06	1.9695e+06	3.68617e+06	1.00437e+07	6.89371e+06	7.70725e+06	7.8018e+06
2155pos		DGDG(34:2)+NH4	DGDG(34:2)+NH4	DGDG	(34:2)	(34:2)				C49 H92 O15 N1	934.646	410.894	0.00600055	1.06946	0.78407	0.0729688	1.61237e+07	9.35617e+06	2.49316e+07	2.60082e+07	2.87763e+07	3.40132e+07	2.57639e+06	2.42201e+07	2.56235e+07	2.53661e+07	2.91372e+07	9.15273e+06	1.30413e+07	2.38043e+07	5.65389e+06	2.29448e+07	2.52544e+07	3.34831e+07	2.33953e+07	3.05126e+07	1.46553e+07	2.36212e+07	3.00724e+07	3.28585e+07	2.17782e+07	2.20053e+07	2.17781e+07
2170pos		Hex1Cer(d38:7)+H-H2O	Hex1Cer(d38:7)+H-H2O	Hex1Cer	(d38:7)	(d38:7)				C44 H72 O7 N1	726.53	402.888	0.0118941	1.22325	0.451924	0.0167124	1.56236e+06	1.04724e+06	2.64405e+06	2.95567e+06	3.45731e+06	3.32264e+06	2.18958e+06	3.8849e+06	3.33947e+06	3.78256e+06	2.5594e+06	973368	1.39645e+06	2.41434e+06	934058	2.41115e+06	2.6482e+06	4.49474e+06	2.36322e+06	3.51598e+06	1.97219e+06	2.68778e+06	3.84706e+06	3.75209e+06	2.71454e+06	2.77106e+06	2.71496e+06
2173pos		Hex1Cer(d40:1)+H	Hex1Cer(d40:1)+H	Hex1Cer	(d40:1)	(d40:1)				C46 H90 O8 N1	784.666	790.12	0.0324165	1.24689	0.233099	0.0842869	1.63532e+07	2.29711e+07	8.382e+06	1.57883e+08	2.02695e+07	2.17866e+07	6.94336e+07	2.41856e+07	2.01213e+07	1.97682e+07	2.05958e+07	2.25616e+07	2.14551e+07	2.1227e+07	1.40351e+07	2.06866e+07	3.15486e+07	3.33681e+07	2.8269e+07	7.7367e+07	4.70525e+07	2.21459e+07	2.0904e+07	3.15587e+07	1.95127e+07	2.03053e+07	2.08126e+07
2178pos		Hex1Cer(d42:1)+H	Hex1Cer(d42:1)+H	Hex1Cer	(d42:1)	(d42:1)				C48 H94 O8 N1	812.697	856.44	0.0220715	1.58978	0.149347	0.209016	8.58442e+06	1.32206e+07	4.53438e+06	3.83399e+08	7.87735e+06	1.0042e+07	1.80447e+08	1.50454e+07	1.31243e+07	1.42633e+07	3.7935e+07	1.35255e+07	9.87401e+06	2.75235e+07	1.02211e+07	9.63113e+06	5.71352e+07	2.75684e+07	2.0398e+07	1.15215e+08	4.09516e+07	1.88168e+07	1.38564e+07	2.246e+07	2.71216e+07	2.82303e+07	2.72448e+07
2179pos		Hex1Cer(d18:1_24:0+O)+H-H2O	Hex1Cer(d42:1+O)+H-H2O	Hex1Cer	(d18:1_24:0+O)	(d18:1)	(24:0+O)			C48 H92 O8 N1	810.682	783.754	0.0454993	1.35863	0.227242	0.140164	8.9784e+06	2.62318e+07	6.00593e+06	2.76099e+08	1.85667e+07	1.89446e+07	1.38751e+08	2.59974e+07	2.16354e+07	2.37745e+07	2.55275e+07	2.29175e+07	1.82163e+07	2.52883e+07	9.16622e+06	1.35575e+07	3.61714e+07	2.80752e+07	2.56635e+07	1.18707e+08	6.09278e+07	2.61576e+07	2.55337e+07	2.98411e+07	2.29315e+07	2.48629e+07	2.48138e+07
2182pos		Hex1Cer(m19:0_21:2)+H	Hex1Cer(m40:2)+H	Hex1Cer	(m19:0_21:2)	(m19:0)	(21:2)			C46 H88 O7 N1	766.656	785.561	0.0579457	1.29954	0.163511	0.0490495	3.20191e+06	5.46039e+06	1.99593e+06	3.68451e+07	4.77854e+06	4.67736e+06	2.21253e+07	6.14023e+06	4.53722e+06	4.9677e+06	5.12597e+06	5.5377e+06	5.80196e+06	5.68237e+06	3.59275e+06	4.53185e+06	7.05076e+06	8.42152e+06	6.95928e+06	1.7923e+07	1.14452e+07	5.45798e+06	4.81342e+06	7.54211e+06	4.14268e+06	4.16836e+06	4.58644e+06
2184pos		Hex1Cer(m19:0_22:2)+H	Hex1Cer(m41:2)+H	Hex1Cer	(m19:0_22:2)	(m19:0)	(22:2)			C47 H90 O7 N1	780.671	819.613	0.0272805	1.10121	0.630268	0.0325104	1.45593e+06	1.87476e+06	602679	1.13328e+07	1.13453e+06	1.49157e+06	8.31519e+06	2.26691e+06	1.35683e+06	1.82264e+06	2.1678e+06	683298	1.09991e+06	1.40314e+06	1.09645e+06	1.56356e+06	2.37609e+06	2.013e+06	2.36613e+06	3.96612e+06	1.29665e+06	2.2099e+06	1.43517e+06	2.28849e+06	1.37676e+06	1.44437e+06	1.44349e+06
2186pos		Hex1Cer(m19:0_23:2)+H	Hex1Cer(m42:2)+H	Hex1Cer	(m19:0_23:2)	(m19:0)	(23:2)			C48 H92 O7 N1	794.687	848.963	0.0107084	1.44271	0.230257	0.0791104	2.30027e+06	3.48188e+06	859079	8.85503e+07	2.07953e+06	2.70165e+06	4.45556e+07	3.65458e+06	3.50347e+06	3.94777e+06	9.18511e+06	3.79123e+06	2.04897e+06	6.6138e+06	3.04028e+06	2.46195e+06	1.35111e+07	6.59731e+06	4.94427e+06	2.76201e+07	9.81207e+06	4.71112e+06	3.3954e+06	5.69789e+06	6.37254e+06	6.49214e+06	6.49229e+06
2189pos		Hex1Cer(m19:0_23:3)+H	Hex1Cer(m42:3)+H	Hex1Cer	(m19:0_23:3)	(m19:0)	(23:3)			C48 H90 O7 N1	792.671	779.616	0.178406	1.40233	0.231797	0.0846207	1.4404e+06	5.86552e+06	1.08576e+06	5.86646e+07	4.03285e+06	3.97876e+06	3.27778e+07	6.35406e+06	4.91181e+06	5.67729e+06	6.70302e+06	4.98547e+06	3.78762e+06	6.1945e+06	2.15528e+06	3.72987e+06	7.92439e+06	6.59824e+06	6.1966e+06	2.67009e+07	1.47771e+07	5.85912e+06	5.72646e+06	6.16808e+06	4.73779e+06	4.85526e+06	6.44539e+06
2196pos		Hex1Cer(t18:0_23:1)+H-H2O	Hex1Cer(t41:1)+H-H2O	Hex1Cer	(t18:0_23:1)	(t18:0)	(23:1)			C47 H90 O8 N1	796.666	860.94	0.344829	1.1056	0.729064	0.0160741	3.15931e+06	2.48738e+06	1.68699e+06	1.17013e+06	2.00417e+06	1.91648e+06	1.70739e+06	3.40489e+06	1.23888e+06	1.30801e+06	2.87708e+06	2.30653e+06	2.93311e+06	1.95556e+06	1.50491e+06	3.12664e+06	5.21452e+06	2.83438e+06	6.43862e+06	1.72005e+06	1.88994e+06	4.10375e+06	3.03345e+06	7.03785e+06	677581	1.10976e+06	1.40809e+06
2204pos		Hex2Cer(d39:1)+H	Hex2Cer(d39:1)+H	Hex2Cer	(d39:1)	(d39:1)				C51 H98 O13 N1	932.703	732.584	0.0503385	0.960308	0.851362	0.160538	1.8338e+07	1.10818e+07	1.01623e+07	1.03798e+07	1.28836e+07	9.51016e+06	8.58281e+06	1.89804e+07	1.34862e+07	9.89843e+06	1.84356e+07	1.014e+07	1.08169e+07	1.00438e+07	9.98941e+06	8.91168e+06	1.73982e+07	1.26471e+07	2.24133e+07	1.37032e+07	6.30071e+06	1.24143e+07	1.17543e+07	2.08942e+07	8.36493e+06	8.52475e+06	9.19005e+06
2209pos		LPC(14:0)+H	LPC(14:0)+H	LPC	(14:0)	(14:0)				C22 H47 O7 N1 P1	468.308	86.28	0.00785753	0.769697	0.36477	0.456568	2.06536e+07	1.82251e+07	3.46729e+07	4.63806e+07	5.3505e+07	5.96607e+07	2.73887e+07	4.40892e+07	3.94927e+07	6.18961e+07	2.84857e+07	1.20052e+07	1.54945e+07	3.09926e+07	1.65756e+07	5.75289e+07	3.22697e+07	2.46907e+07	3.97293e+07	4.10146e+07	4.26988e+07	3.60115e+07	2.56074e+07	6.13973e+07	3.25379e+07	3.29512e+07	3.24811e+07
2212pos		LPC(14:1e)+H	LPC(14:1e)+H	LPC	(14:1e)	(14:1e)				C22 H47 O6 N1 P1	452.314	154.457	0.0169987	0.969928	0.912523	0.0907958	8.68994e+06	5.47072e+06	1.22158e+07	3.29505e+06	9.32267e+06	1.00118e+07	5.50546e+06	1.04298e+07	4.44381e+06	8.83055e+06	9.5984e+06	1.74546e+06	5.47079e+06	2.98039e+06	3.53087e+06	7.50545e+06	1.13126e+07	1.0277e+07	5.83184e+06	8.41321e+06	2.34368e+06	6.89382e+06	4.55861e+06	1.17258e+07	5.70567e+06	5.54205e+06	5.53981e+06
221pos		Cer(d34:1)+H	Cer(d34:1)+H	Cer	(d34:1)	(d34:1)				C34 H68 O3 N1	538.519	500.02	0.0430051	1.1457	0.613578	0.140591	2.50621e+07	1.34706e+07	2.52368e+07	3.71272e+07	4.17861e+07	3.80745e+07	3.63831e+07	2.6427e+07	2.19795e+07	3.92877e+07	4.40471e+07	1.28432e+07	1.052e+07	3.3295e+07	2.06585e+07	2.74139e+07	2.50431e+07	4.12198e+07	2.76412e+07	3.12422e+07	5.47375e+07	3.08488e+07	3.45705e+07	2.77229e+07	2.51136e+07	2.50759e+07	2.70113e+07
2226pos		LPC(16:0)+H	LPC(16:0)+H	LPC	(16:0)	(16:0)				C24 H51 O7 N1 P1	496.34	110.213	0.00474578	0.935246	0.795596	3.37297	6.5326e+09	3.70265e+09	1.02352e+10	8.02995e+09	1.04503e+10	1.18224e+10	6.32371e+09	9.61678e+09	8.85753e+09	1.15956e+10	9.10637e+09	1.32571e+09	4.88248e+09	6.29128e+09	4.08514e+09	1.00219e+10	9.92063e+09	8.14411e+09	7.98076e+09	8.67981e+09	6.91412e+09	7.12379e+09	7.16055e+09	1.22396e+10	6.77462e+09	6.83837e+09	6.79756e+09
2227pos		LPC(16:0)+Na	LPC(16:0)+Na	LPC	(16:0)	(16:0)				C24 H50 O7 N1 P1 Na1	518.322	110.213	0.0670512	1.46461	0.12235	1.18369	2.79947e+08	2.74731e+08	3.57685e+08	7.19472e+08	4.10867e+08	4.43833e+08	6.0559e+08	7.92588e+08	4.49494e+08	7.87577e+08	6.99492e+08	1.09319e+08	3.4484e+08	6.41356e+08	1.27696e+08	6.70293e+08	7.23693e+08	7.54372e+08	7.2331e+08	7.4413e+08	6.41321e+08	7.59473e+08	7.34564e+08	8.22673e+08	6.32517e+08	5.61381e+08	6.31572e+08
222pos		Cer(d18:1_16:0)+H	Cer(d34:1)+H	Cer	(d18:1_16:0)	(d18:1)	(16:0)			C34 H68 O3 N1	538.519	520.381	0.0143543	1.02883	0.915615	0.156672	1.02795e+07	9.90802e+06	2.24679e+07	2.34389e+07	3.34792e+07	3.70594e+07	2.33152e+07	3.01129e+07	2.17624e+07	2.18309e+07	2.9974e+07	8.09191e+06	9.21728e+06	2.08127e+07	1.25453e+07	2.13681e+07	2.88902e+07	2.81967e+07	1.89457e+07	2.77638e+07	2.33815e+07	2.24134e+07	1.97219e+07	2.84255e+07	1.97174e+07	1.97069e+07	1.92261e+07
2233pos		LPC(16:0)+H	LPC(16:0)+H	LPC	(16:0)	(16:0)				C24 H51 O7 N1 P1	496.34	152.113	0.0663135	0.114059	0.176582	1.76547	2.91697e+08	9.40913e+08	3.37998e+08	2.40021e+07	1.54109e+07	5.73829e+07	8.08666e+08	3.06704e+07	3.38675e+08	4.72664e+08	3.70872e+07	8.00262e+06	3.66485e+07	5.1921e+08	3.688e+07	3.18849e+07	3.69071e+07	3.28117e+07	3.52116e+07	2.65541e+07	2.07586e+07	2.66382e+07	2.69352e+07	4.62252e+08	2.37211e+07	2.37965e+07	2.11313e+07
2235pos		LPC(16:0)+H	LPC(16:0)+H	LPC	(16:0)	(16:0)				C24 H51 O7 N1 P1	496.34	188.866	0.0343228	0.570159	0.0642906	0.619609	5.13975e+07	6.27793e+07	8.21771e+07	3.21977e+07	5.37092e+07	6.16173e+07	2.25629e+07	2.99708e+07	4.41808e+07	3.70521e+07	4.77506e+07	7.67966e+06	2.6315e+07	1.90941e+07	2.23977e+07	4.84289e+07	3.33256e+07	3.03652e+07	3.52038e+07	3.68243e+07	1.67631e+07	2.5976e+07	1.77344e+07	9.09572e+07	3.56235e+07	3.3515e+07	3.55541e+07
223neg		Cer(d18:2_18:0)-H	Cer(d36:2)-H	Cer	(d18:2_18:0)	(d18:2)	(18:0)			C36 H68 O3 N1	562.52	646.837	0.0299592	1.04428	0.851441	0.198843	2.68213e+06	3.83516e+06	2.9212e+06	4.79476e+06	2.54752e+06	2.69543e+06	3.0373e+06	944177	3.52806e+06	2.36248e+06	1.03811e+06	3.09442e+06	2.80414e+06	4.11219e+06	2.99908e+06	2.72102e+06	3.30201e+06	4.43095e+06	4.25617e+06	3.08815e+06	5.44723e+06	3.65858e+06	2.33813e+06	2.72982e+06	2.9854e+06	2.83122e+06	2.98131e+06
224neg		Cer(d18:2_18:0)+HCOO	Cer(d36:2)+HCOO	Cer	(d18:2_18:0)	(d18:2)	(18:0)			C37 H70 O5 N1	608.526	646.837	0.00606349	1.03249	0.88326	1.10749	9.7321e+07	1.31251e+08	8.44361e+07	1.73158e+08	1.11258e+08	9.36329e+07	1.11664e+08	3.9253e+07	1.40845e+08	8.60348e+07	3.83802e+07	1.13799e+08	1.07256e+08	1.56852e+08	9.29663e+07	9.79867e+07	1.11188e+08	1.84459e+08	1.67397e+08	1.0293e+08	1.8058e+08	1.13242e+08	1.01437e+08	1.00893e+08	1.03169e+08	1.02088e+08	1.03168e+08
225pos		Cer(d18:1_16:0)+H	Cer(d34:1)+H	Cer	(d18:1_16:0)	(d18:1)	(16:0)			C34 H68 O3 N1	538.519	642.543	0.0306672	1.30711	0.219465	0.320777	1.88472e+08	1.6184e+08	1.91011e+08	3.73025e+08	1.80969e+08	1.17807e+08	3.60187e+08	1.95242e+08	1.75569e+08	1.81423e+08	2.35663e+08	1.83124e+08	1.62645e+08	2.64936e+08	1.71563e+08	1.60704e+08	1.80106e+08	2.10793e+08	2.12487e+08	1.94018e+08	4.15597e+08	1.88096e+08	1.83956e+08	1.84582e+08	1.69252e+08	1.78786e+08	1.78343e+08
226pos		Cer(d34:1)+H-H2O	Cer(d34:1)+H-H2O	Cer	(d18:1_16:0)	(d18:1)	(16:0)			C34 H66 O2 N1	520.509	642.543	0.0393767	1.18832	0.414928	0.223332	1.80187e+08	2.01059e+08	1.86555e+08	3.73457e+08	1.83147e+08	1.38482e+08	3.88067e+08	1.76076e+08	1.83877e+08	1.94007e+08	2.2265e+08	2.02622e+08	1.72273e+08	2.97057e+08	1.93685e+08	1.84668e+08	1.87251e+08	2.07789e+08	2.28769e+08	1.95077e+08	4.28559e+08	1.88275e+08	1.91317e+08	1.91827e+08	1.84093e+08	1.97926e+08	1.86177e+08
2301pos		LPC(16:0)+H	LPC(16:0)+H	LPC	(16:0)	(16:0)				C24 H51 O7 N1 P1	496.34	1319.28	0.16585	2.0872	0.179622	0.324278	597076	7.24612e+06	1.20795e+07	3.57701e+06	2.61416e+07	5.18905e+06	4.90008e+06	4.59969e+07	9.39963e+06	2.92268e+07	2.56435e+07	409447	236170	4.09688e+07	3.58148e+06	693415	1.79373e+07	7.77975e+06	9.2907e+06	3.39164e+07	2.64507e+07	2.80057e+07	5.32962e+07	3.32125e+07	1.97302e+07	1.69731e+07	2.36102e+07
2305pos		LPC(16:0e)+H	LPC(16:0e)+H	LPC	(16:0e)	(16:0e)				C24 H53 O6 N1 P1	482.361	131.001	0.0269517	1.10979	0.636578	0.0748869	3.88588e+07	4.99937e+07	3.54551e+07	4.53303e+07	6.97174e+07	1.0444e+08	4.53058e+07	8.5817e+07	6.40613e+07	9.08911e+07	4.01255e+07	1.4556e+07	5.54039e+07	3.7647e+07	2.40693e+07	9.99045e+07	3.18017e+07	7.96835e+07	4.93198e+07	6.3672e+07	6.69528e+07	5.54126e+07	7.72505e+07	8.553e+07	4.63827e+07	4.63844e+07	4.42515e+07
2308pos		LPC(16:1)+H	LPC(16:1)+H	LPC	(16:1)	(16:1)				C24 H49 O7 N1 P1	494.324	79.3056	0.00910576	0.748202	0.369547	0.879376	1.81412e+08	5.38937e+07	2.84709e+08	2.17622e+08	2.30038e+08	2.63046e+08	1.79476e+08	2.06245e+08	1.74072e+08	3.22234e+08	2.37702e+08	4.9423e+07	9.14779e+07	1.31482e+08	1.20274e+08	2.4894e+08	2.57004e+08	1.28772e+08	1.67604e+08	2.21305e+08	1.48846e+08	1.27233e+08	1.10154e+08	2.83651e+08	1.59917e+08	1.62474e+08	1.62457e+08
2322pos		LPC(16:1e)+H	LPC(16:1e)+H	LPC	(16:1e)	(16:1e)				C24 H51 O6 N1 P1	480.345	123.768	0.00822215	0.978404	0.920262	0.626193	3.63594e+08	2.39968e+08	5.1837e+08	3.19537e+08	3.5795e+08	4.13054e+08	3.03828e+08	4.04383e+08	3.97355e+08	4.30072e+08	4.61889e+08	8.24559e+07	2.49506e+08	2.666e+08	1.71055e+08	4.66846e+08	4.75301e+08	4.33471e+08	4.55864e+08	3.36649e+08	1.93561e+08	3.11608e+08	3.4409e+08	5.84675e+08	2.9776e+08	2.9776e+08	2.93539e+08
2323pos		LPC(16:1e)+Na	LPC(16:1e)+Na	LPC	(16:1e)	(16:1e)				C24 H50 O6 N1 P1 Na1	502.327	123.768	0.016955	1.07913	0.768312	0.0672291	2.92177e+07	1.38296e+07	4.2101e+07	2.60122e+07	2.82924e+07	2.8151e+07	2.08378e+07	3.11863e+07	3.70556e+07	3.02934e+07	3.30365e+07	5.80747e+06	1.68832e+07	1.92413e+07	9.51623e+06	3.21099e+07	3.67478e+07	3.90947e+07	3.96436e+07	2.95002e+07	1.33024e+07	2.69554e+07	3.01501e+07	5.56178e+07	2.59556e+07	2.67333e+07	2.67328e+07
232neg		Cer(d14:0_22:3)+HCOO	Cer(d36:3)+HCOO	Cer	(d14:0_22:3)	(d14:0)	(22:3)			C37 H68 O5 N1	606.51	588.894	0.0246944	0.982604	0.883505	0.190084	6.91591e+06	4.40088e+06	5.2693e+06	4.44385e+06	3.14598e+06	4.40784e+06	3.98587e+06	3.81424e+06	4.02708e+06	2.50051e+06	1.30144e+06	3.74252e+06	3.47497e+06	3.23785e+06	4.68307e+06	3.68635e+06	6.02036e+06	4.92643e+06	4.21477e+06	3.09764e+06	3.64179e+06	2.70772e+06	3.45745e+06	4.65429e+06	3.40979e+06	3.55881e+06	3.56098e+06
2342pos		LPC(16:2e)+H	LPC(16:2e)+H	LPC	(16:2e)	(16:2e)				C24 H49 O6 N1 P1	478.329	105.321	0.0214162	0.968137	0.917658	0.130418	1.49645e+07	5.13482e+06	2.67406e+07	2.14031e+07	1.60078e+07	2.37426e+07	1.74089e+07	2.07604e+07	1.16912e+07	2.43285e+07	2.42605e+07	3.84812e+06	7.68576e+06	1.63346e+07	1.38417e+07	1.99955e+07	2.14799e+07	2.53515e+07	2.14029e+07	1.78708e+07	9.67828e+06	1.05328e+07	1.74462e+07	3.14792e+07	1.73466e+07	1.79759e+07	1.73056e+07
2344pos		LPC(17:0)+H	LPC(17:0)+H	LPC	(17:0)	(17:0)				C25 H53 O7 N1 P1	510.355	123.531	0.0284951	1.00547	0.981097	0.248173	1.21862e+08	4.67459e+07	1.59529e+08	8.41143e+07	8.72988e+07	1.12531e+08	8.75686e+07	1.08972e+08	9.00772e+07	1.45672e+08	1.12205e+08	2.515e+07	6.351e+07	7.37845e+07	6.42213e+07	1.06113e+08	1.41105e+08	9.5669e+07	8.7138e+07	9.06736e+07	7.78067e+07	7.85238e+07	8.28119e+07	1.50353e+08	7.65832e+07	8.04357e+07	7.66014e+07
234neg		Cer(d17:1_20:0)-H	Cer(d37:1)-H	Cer	(d17:1_20:0)	(d17:1)	(20:0)			C37 H72 O3 N1	578.552	744.137	0.00603685	0.890462	0.383305	0.201807	1.26068e+07	1.07258e+07	1.17368e+07	1.06026e+07	1.06691e+07	9.987e+06	5.50779e+06	4.55879e+06	1.12891e+07	1.04181e+07	2.74706e+06	1.05673e+07	1.31224e+07	1.20874e+07	9.23484e+06	1.00576e+07	1.28382e+07	1.0853e+07	1.35499e+07	9.4614e+06	8.43032e+06	1.0513e+07	1.12193e+07	1.47139e+07	8.29158e+06	8.30339e+06	8.38394e+06
2352pos		LPC(17:1)+H	LPC(17:1)+H	LPC	(17:1)	(17:1)				C25 H51 O7 N1 P1	508.34	94.9121	0.00606128	0.605624	0.212407	0.502686	3.66028e+07	1.20234e+07	5.32388e+07	3.03443e+07	5.59103e+07	6.60067e+07	1.71348e+07	4.50031e+07	3.07291e+07	6.75948e+07	3.199e+07	8.28362e+06	1.83418e+07	1.74888e+07	1.39663e+07	3.87333e+07	4.23781e+07	2.23167e+07	2.86989e+07	3.80111e+07	1.64762e+07	2.13143e+07	2.10001e+07	3.68125e+07	2.69024e+07	2.69036e+07	2.71864e+07
2353pos		LPC(17:1)+H	LPC(17:1)+H	LPC	(17:1)	(17:1)				C25 H51 O7 N1 P1	508.34	167.28	0.0127917	1.27235	0.489782	0.104515	1.91013e+07	4.66233e+06	2.55504e+07	2.13942e+07	2.59948e+07	3.6361e+07	9.29977e+06	3.15844e+07	2.15427e+07	2.02311e+07	1.70009e+07	3.05969e+06	1.89424e+07	1.36345e+07	7.99686e+06	2.29522e+07	3.23061e+07	3.08504e+07	1.10877e+07	2.1726e+07	1.00556e+07	1.39315e+07	2.36477e+07	3.61654e+07	1.81746e+07	1.86106e+07	1.85488e+07
2367pos		LPC(18:0)+H	LPC(18:0)+H	LPC	(18:0)	(18:0)				C26 H55 O7 N1 P1	524.371	157.119	0.0193546	1.21245	0.391486	1.0041	4.52336e+09	3.18151e+09	6.64543e+09	6.39119e+09	5.32052e+09	6.91461e+09	3.82085e+09	5.77197e+09	6.24529e+09	6.99709e+09	5.93936e+09	7.83233e+08	3.68386e+09	5.26354e+09	3.03719e+09	6.27678e+09	6.84094e+09	7.92759e+09	6.76702e+09	5.93073e+09	5.71318e+09	6.91041e+09	6.32282e+09	7.94327e+09	4.76871e+09	4.76515e+09	4.60892e+09
2368pos		LPC(18:0)+Na	LPC(18:0)+Na	LPC	(18:0)	(18:0)				C26 H54 O7 N1 P1 Na1	546.353	157.119	0.00993792	1.20143	0.533457	0.408845	6.08737e+08	2.99042e+08	8.09578e+08	7.16541e+08	4.76277e+08	5.11873e+08	3.93026e+08	3.94328e+08	9.42954e+08	7.88903e+08	6.60373e+08	9.212e+07	3.50838e+08	6.04119e+08	2.32692e+08	5.90129e+08	8.0308e+08	1.01053e+09	9.07293e+08	7.72586e+08	6.33652e+08	7.84773e+08	5.20891e+08	1.06336e+09	6.47749e+08	6.59116e+08	6.48056e+08
23pos		AcCa(17:0)+H	AcCa(17:0)+H	AcCa	(17:0)	(17:0)				C24 H48 O4 N1	414.358	116.524	0.0580952	1.66463	0.0365963	0.236325	2.36934e+07	1.14183e+07	1.52872e+07	1.36411e+07	8.35836e+06	1.68198e+07	2.30623e+07	2.75493e+07	3.05328e+07	1.06158e+07	1.77976e+07	8.48022e+06	1.25811e+07	1.79262e+07	1.35691e+07	2.33375e+07	1.71876e+07	2.24212e+07	1.18914e+07	2.18953e+07	1.85439e+07	2.25476e+07	8.85893e+06	4.73249e+07	1.5509e+07	1.71634e+07	1.71994e+07
240neg		Cer(d19:2_18:0)+HCOO	Cer(d37:2)+HCOO	Cer	(d19:2_18:0)	(d19:2)	(18:0)			C38 H72 O5 N1	622.542	684.18	0.0141304	1.02923	0.846242	0.348295	5.96643e+07	2.42956e+07	4.93825e+07	4.01855e+07	2.51193e+07	2.74089e+07	4.15172e+07	1.4367e+07	3.03726e+07	2.87334e+07	1.50989e+07	2.42209e+07	3.32088e+07	3.91906e+07	4.11412e+07	2.37536e+07	5.22447e+07	4.06318e+07	3.67245e+07	2.46573e+07	2.87127e+07	2.46609e+07	2.97885e+07	3.55456e+07	2.07955e+07	2.04196e+07	2.02263e+07
2433pos		LPC(18:0e)+H	LPC(18:0e)+H	LPC	(18:0e)	(18:0e)				C26 H57 O6 N1 P1	510.392	195.765	0.0145	1.27299	0.389751	0.130491	1.62672e+07	3.3047e+07	1.8321e+07	4.71058e+07	6.1609e+07	1.05246e+08	1.28026e+07	9.18825e+07	6.47757e+07	6.71883e+07	1.36945e+07	1.34571e+07	4.54298e+07	3.45117e+07	6.8755e+06	6.80182e+07	1.48244e+07	9.66677e+07	4.00641e+07	6.15733e+07	4.12827e+07	5.79523e+07	7.49197e+07	1.01111e+08	4.19119e+07	4.29713e+07	4.19078e+07
2434pos		LPC(18:0e)+Na	LPC(18:0e)+Na	LPC	(18:0e)	(18:0e)				C26 H56 O6 N1 P1 Na1	532.374	195.765	0.0126109	1.06801	0.836745	0.10498	1.27057e+07	1.94893e+07	1.11517e+07	1.87839e+07	2.18431e+07	3.98626e+07	3.59744e+06	2.79266e+07	3.94136e+07	4.06072e+07	6.13894e+06	7.16602e+06	2.2316e+07	1.14461e+07	3.70323e+06	2.58732e+07	6.03143e+06	5.08693e+07	1.68531e+07	2.87512e+07	8.96601e+06	2.31031e+07	2.25582e+07	5.39095e+07	2.20111e+07	2.24959e+07	2.20121e+07
2444pos		LPC(18:1)+H	LPC(18:1)+H	LPC	(18:1)	(18:1)				C26 H53 O7 N1 P1	522.355	114.972	0.0444176	1.06804	0.786951	1.37017	3.0221e+09	1.50312e+09	5.32078e+09	3.66053e+09	3.84615e+09	2.82935e+09	2.17567e+09	3.84163e+09	3.41981e+09	3.59488e+09	3.97582e+09	5.5796e+08	1.3536e+09	2.61977e+09	1.2007e+09	2.59711e+09	4.77715e+09	3.41539e+09	3.32677e+09	3.62725e+09	2.35491e+09	2.95316e+09	2.80498e+09	4.90122e+09	2.7017e+09	2.69976e+09	2.49816e+09
2445pos		LPC(18:1)+Na	LPC(18:1)+Na	LPC	(18:1)	(18:1)				C26 H52 O7 N1 P1 Na1	544.337	114.972	0.141137	1.21845	0.569421	0.293127	1.59086e+08	6.76452e+07	2.42793e+08	4.04849e+08	4.18071e+08	1.8923e+08	9.54632e+07	2.0458e+08	1.91268e+08	2.01339e+08	3.53148e+08	3.60993e+07	9.86179e+07	2.93199e+08	1.22315e+08	1.60826e+08	2.06801e+08	2.40517e+08	3.9853e+08	4.23234e+08	2.55619e+08	4.0826e+08	3.8969e+08	2.35321e+08	2.17551e+08	2.19447e+08	2.76626e+08
2447pos		LPC(18:1)+H	LPC(18:1)+H	LPC	(18:1)	(18:1)				C26 H53 O7 N1 P1	522.355	184.036	0.0383679	0.610461	0.0805353	0.279122	4.96556e+06	1.32173e+07	9.6675e+06	4.05785e+06	6.61493e+06	1.0803e+07	3.18692e+06	8.53918e+06	8.39443e+06	6.09648e+06	6.58152e+06	3.65299e+06	2.73634e+06	3.19883e+06	5.64204e+06	5.2702e+06	7.53636e+06	3.84597e+06	9.01098e+06	6.69173e+06	3.73595e+06	5.69764e+06	5.59908e+06	1.42256e+07	5.41337e+06	5.34648e+06	5.74082e+06
2475pos		LPC(18:1e)+H	LPC(18:1e)+H	LPC	(18:1e)	(18:1e)				C26 H55 O6 N1 P1	508.376	178.184	0.015757	1.07015	0.799012	0.129092	2.21758e+07	4.69133e+07	3.17258e+07	3.78082e+07	6.99748e+07	7.09545e+07	1.48056e+07	8.78424e+07	4.52406e+07	4.67856e+07	2.67826e+07	1.24994e+07	3.52677e+07	2.65098e+07	9.3443e+06	5.23715e+07	3.05612e+07	6.6227e+07	5.38606e+07	4.16873e+07	2.0401e+07	4.25749e+07	6.97895e+07	9.30527e+07	3.57715e+07	3.67576e+07	3.57731e+07
2476pos		LPC(18:1e)+Na	LPC(18:1e)+Na	LPC	(18:1e)	(18:1e)				C26 H54 O6 N1 P1 Na1	530.358	178.184	0.0186018	1.43971	0.327717	0.0625717	1.84722e+06	2.05855e+06	1.90517e+06	2.40379e+06	3.17275e+06	5.78086e+06	334471	6.16325e+06	4.48143e+06	3.26678e+06	1.60692e+06	499766	2.08121e+06	1.73937e+06	222878	3.15404e+06	1.69383e+06	7.78512e+06	3.5784e+06	2.91574e+06	1.13232e+06	3.01187e+06	6.25514e+06	6.45227e+06	2.8418e+06	2.9352e+06	2.93553e+06
2485pos		LPC(18:2)+H	LPC(18:2)+H	LPC	(18:2)	(18:2)				C26 H51 O7 N1 P1	520.34	53.94	0.00980276	2.56267	0.0015927	0.683865	1.08866e+07	1.20186e+07	2.84756e+07	2.63185e+07	2.23363e+07	2.16509e+07	2.86636e+07	5.42663e+07	3.55359e+07	1.4923e+07	1.16671e+07	1.02296e+07	2.23726e+07	2.7568e+07	1.76341e+07	2.1507e+07	3.30695e+07	2.94025e+07	2.00691e+07	4.19879e+07	4.62905e+07	4.96682e+07	5.74125e+07	5.00087e+07	3.24805e+07	3.3038e+07	3.30386e+07
2512pos		LPC(18:2e)+H	LPC(18:2e)+H	LPC	(18:2e)	(18:2e)				C26 H53 O6 N1 P1	506.361	130.703	0.0091877	0.910872	0.680889	0.315196	3.85937e+07	3.31618e+07	5.59674e+07	3.46751e+07	4.0262e+07	3.92442e+07	2.55179e+07	4.65193e+07	4.20029e+07	4.68548e+07	4.78796e+07	1.09053e+07	2.59898e+07	2.60712e+07	1.7822e+07	4.638e+07	4.63851e+07	4.86127e+07	5.76108e+07	3.57458e+07	1.79743e+07	3.30866e+07	3.55313e+07	6.1962e+07	3.14431e+07	3.19449e+07	3.14406e+07
252neg		Cer(d18:1_20:0)-H	Cer(d38:1)-H	Cer	(d18:1_20:0)	(d18:1)	(20:0)			C38 H74 O3 N1	592.567	772.904	0.00601813	0.929844	0.620849	0.217344	5.83383e+07	5.45786e+07	5.74334e+07	5.31467e+07	5.45627e+07	5.34838e+07	2.96905e+07	1.70263e+07	5.74144e+07	4.58571e+07	1.36311e+07	4.97674e+07	6.39797e+07	5.59154e+07	4.22548e+07	5.29027e+07	5.48084e+07	6.12748e+07	6.02188e+07	4.88509e+07	4.6189e+07	5.01535e+07	5.75025e+07	6.10333e+07	3.75287e+07	3.71387e+07	3.75284e+07
2530pos		LPC(19:0)+H	LPC(19:0)+H	LPC	(19:0)	(19:0)				C27 H57 O7 N1 P1	538.387	195.587	0.00493816	1.08836	0.759393	0.114688	2.23214e+08	4.66107e+07	2.56453e+08	1.14231e+08	1.02299e+08	1.4301e+08	1.03754e+08	1.5544e+08	1.31531e+08	1.33089e+08	1.82986e+08	2.60244e+07	6.86142e+07	6.84224e+07	8.49177e+07	9.85175e+07	2.3039e+08	1.25629e+08	7.7585e+07	1.23947e+08	4.98832e+07	8.68087e+07	8.89517e+07	1.88674e+08	1.03701e+08	1.04597e+08	1.04588e+08
2531pos		LPC(19:0)+Na	LPC(19:0)+Na	LPC	(19:0)	(19:0)				C27 H56 O7 N1 P1 Na1	560.369	195.587	0.00819251	1.03309	0.921892	0.144284	1.94241e+08	2.68772e+07	1.79877e+08	4.42817e+07	4.249e+07	6.59246e+07	3.38106e+07	6.18735e+07	9.3889e+07	8.14156e+07	9.57545e+07	1.37238e+07	3.82466e+07	2.54045e+07	4.70163e+07	3.96139e+07	1.10828e+08	8.63779e+07	3.6578e+07	6.7328e+07	1.12498e+07	4.34892e+07	3.46065e+07	1.21421e+08	6.41749e+07	6.51033e+07	6.4202e+07
2535pos		LPC(19:1)+H	LPC(19:1)+H	LPC	(19:1)	(19:1)				C27 H55 O7 N1 P1	536.371	132.068	0.0414361	0.988323	0.966188	0.110018	1.50781e+07	8.24497e+06	9.77175e+06	1.22687e+07	1.27075e+07	1.47476e+07	3.04499e+06	1.71397e+07	1.26996e+07	1.74306e+07	1.44335e+07	3.89517e+06	6.24478e+06	9.53711e+06	4.15398e+06	1.56173e+07	2.04286e+07	1.35573e+07	8.01495e+06	1.38194e+07	3.21382e+06	1.22705e+07	1.18552e+07	2.05822e+07	8.20177e+06	7.67271e+06	7.61201e+06
253neg		Cer(d18:1_20:0)+HCOO	Cer(d38:1)+HCOO	Cer	(d18:1_20:0)	(d18:1)	(20:0)			C39 H76 O5 N1	638.573	772.904	0.0104459	0.939467	0.662487	1.25967	2.11602e+09	2.03243e+09	2.07578e+09	2.02196e+09	1.97977e+09	2.06346e+09	1.10009e+09	6.7264e+08	2.1122e+09	1.76891e+09	5.32443e+08	1.95978e+09	2.44598e+09	2.18718e+09	1.57448e+09	1.96455e+09	2.09542e+09	2.32249e+09	2.25601e+09	1.81271e+09	1.77997e+09	1.9408e+09	2.16843e+09	2.25407e+09	1.42885e+09	1.40307e+09	1.40355e+09
2540pos		LPC(20:0)+H	LPC(20:0)+H	LPC	(20:0)	(20:0)				C28 H59 O7 N1 P1	552.402	230.513	0.0264544	1.02129	0.933022	0.143469	2.33627e+07	1.36168e+07	2.71541e+07	2.78609e+07	2.68061e+07	3.7106e+07	1.80787e+07	2.39153e+07	2.46569e+07	3.30353e+07	2.13306e+07	6.44023e+06	1.39147e+07	2.28387e+07	1.61626e+07	2.72924e+07	3.4315e+07	2.75673e+07	1.70346e+07	2.54804e+07	3.15974e+07	2.19162e+07	1.79817e+07	3.21728e+07	2.27461e+07	2.27473e+07	2.17201e+07
2545pos		LPC(20:0e)+H	LPC(20:0e)+H	LPC	(20:0e)	(20:0e)				C28 H61 O6 N1 P1	538.423	286.621	0.0185918	1.59387	0.0859158	0.187153	1.77369e+06	4.85342e+06	1.22153e+06	1.34027e+07	8.7018e+06	1.45052e+07	1.90238e+06	1.39056e+07	1.01247e+07	1.20549e+07	1.48092e+06	3.28723e+06	5.81747e+06	1.09006e+07	995575	1.28148e+07	2.71067e+06	1.66962e+07	7.90489e+06	1.1348e+07	2.04182e+07	1.09921e+07	1.39479e+07	1.93762e+07	7.18272e+06	7.26412e+06	7.00422e+06
2551pos		LPC(20:1)+H	LPC(20:1)+H	LPC	(20:1)	(20:1)				C28 H57 O7 N1 P1	550.387	155.601	0.285124	1.23369	0.524707	0.273054	7.96365e+07	1.82239e+07	1.42842e+08	5.78803e+07	1.13191e+08	1.56974e+08	4.56729e+07	6.64786e+07	5.36797e+07	1.05424e+08	5.19579e+07	2.23633e+07	8.03194e+07	4.22296e+07	4.59315e+07	1.34734e+08	1.07519e+08	1.50809e+08	4.28663e+07	1.09504e+08	5.71384e+07	9.71593e+07	1.14409e+08	1.7849e+08	7.11539e+07	4.46016e+07	4.48358e+07
2556pos		LPC(20:2)+H	LPC(20:2)+H	LPC	(20:2)	(20:2)				C28 H55 O7 N1 P1	548.371	115.604	0.11753	0.993119	0.974732	0.299664	8.40956e+07	5.52998e+07	1.06924e+08	1.09781e+08	1.15053e+08	1.33395e+08	2.53954e+07	1.00241e+08	1.12499e+08	1.111e+08	5.80984e+07	2.90258e+07	6.51095e+07	7.13501e+07	2.91865e+07	1.28996e+08	9.93851e+07	1.22545e+08	8.70582e+07	9.74705e+07	6.0361e+07	9.37619e+07	8.52597e+07	1.62257e+08	7.23242e+07	7.2326e+07	5.85376e+07
2566pos		LPC(20:3)+H	LPC(20:3)+H	LPC	(20:3)	(20:3)				C28 H53 O7 N1 P1	546.355	96.2682	0.00559007	1.15492	0.580572	0.0770476	1.89962e+08	4.95043e+07	2.25893e+08	2.36653e+08	2.51117e+08	3.0698e+08	6.72579e+07	2.96035e+08	2.65668e+08	1.787e+08	1.45462e+08	7.88715e+07	1.26083e+08	1.64787e+08	5.9443e+07	2.07285e+08	2.79614e+08	2.56619e+08	2.26923e+08	2.46781e+08	1.35648e+08	2.26837e+08	2.20059e+08	3.06188e+08	1.82129e+08	1.82125e+08	1.83896e+08
2576pos		LPC(20:4)+H	LPC(20:4)+H	LPC	(20:4)	(20:4)				C28 H51 O7 N1 P1	544.34	89.9188	0.00912755	1.26963	0.325164	1.16707	2.51254e+09	1.04139e+09	4.30079e+09	4.62712e+09	3.99785e+09	5.0115e+09	9.27929e+08	5.74043e+09	5.25548e+09	3.12165e+09	2.93938e+09	1.61717e+09	2.51107e+09	3.07716e+09	9.00953e+08	3.87793e+09	4.21162e+09	4.74994e+09	4.28145e+09	4.0666e+09	2.49932e+09	4.44668e+09	4.2656e+09	5.74321e+09	3.56959e+09	3.51331e+09	3.5693e+09
2577pos		LPC(20:4)+Na	LPC(20:4)+Na	LPC	(20:4)	(20:4)				C28 H50 O7 N1 P1 Na1	566.322	89.9188	0.0251063	1.30456	0.272607	0.435886	1.26134e+08	8.17096e+07	2.16111e+08	2.85487e+08	1.58523e+08	2.14076e+08	1.64484e+08	1.99857e+08	2.66358e+08	2.48387e+08	2.29168e+08	8.275e+07	9.2384e+07	2.50198e+08	6.87375e+07	2.20592e+08	2.25166e+08	2.45855e+08	2.02987e+08	1.76107e+08	3.33623e+08	2.32509e+08	1.85246e+08	1.93368e+08	2.2214e+08	2.32126e+08	2.32051e+08
2597pos		LPC(20:4e)+H	LPC(20:4e)+H	LPC	(20:4e)	(20:4e)				C28 H53 O6 N1 P1	530.361	181.861	0.0134671	0.936925	0.838297	0.0901676	6.36867e+06	4.93363e+06	4.16008e+06	3.29272e+06	5.25007e+06	6.63025e+06	781176	5.87654e+06	9.21051e+06	7.73462e+06	4.37694e+06	1.51151e+06	4.09243e+06	2.0808e+06	951710	3.2513e+06	3.35615e+06	1.09562e+07	6.25666e+06	4.79106e+06	784791	4.18978e+06	4.37866e+06	1.25006e+07	5.26917e+06	5.39104e+06	5.3968e+06
2598pos		LPC(20:5)+H	LPC(20:5)+H	LPC	(20:5)	(20:5)				C28 H49 O7 N1 P1	542.324	86.136	0.0248043	0.82734	0.630858	0.279017	1.18354e+07	9.95464e+06	2.65054e+07	2.34184e+07	5.41136e+07	6.8124e+07	5.55359e+06	4.96056e+07	5.04886e+07	3.67544e+07	1.88973e+07	9.31205e+06	1.27149e+07	2.00662e+07	1.64325e+07	2.02591e+07	2.59932e+07	2.59831e+07	1.81996e+07	3.26028e+07	1.43646e+07	3.16221e+07	2.82475e+07	5.60405e+07	2.46782e+07	2.36359e+07	2.46845e+07
2600pos		LPC(20:5)+H	LPC(20:5)+H	LPC	(20:5)	(20:5)				C28 H49 O7 N1 P1	542.324	196.872	0.112463	0.554069	0.133455	0.125164	2.56313e+06	1.06243e+06	3.4772e+06	1.81147e+06	1.84382e+06	2.83378e+06	129018	1.88973e+06	2.19637e+06	1.74978e+06	1.24558e+06	237058	594514	125491	1.09947e+06	468046	930856	1.17199e+06	2.39376e+06	2.56604e+06	128800	1.29359e+06	528885	4.00353e+06	2.15958e+06	1.73123e+06	2.05154e+06
2601pos		LPC(22:0)+H	LPC(22:0)+H	LPC	(22:0)	(22:0)				C30 H63 O7 N1 P1	580.434	353.648	0.0239324	1.21348	0.58733	0.0777651	5.73e+06	2.49326e+06	5.67883e+06	9.79512e+06	6.30328e+06	8.16554e+06	9.21706e+06	5.84275e+06	6.15218e+06	8.05543e+06	6.38065e+06	1.95388e+06	2.21419e+06	6.93055e+06	4.59542e+06	5.07954e+06	7.50254e+06	5.36202e+06	4.25398e+06	6.22906e+06	1.39651e+07	6.28605e+06	4.2214e+06	6.75712e+06	5.23535e+06	5.00919e+06	5.04314e+06
2603pos		LPC(22:1)+H	LPC(22:1)+H	LPC	(22:1)	(22:1)				C30 H61 O7 N1 P1	578.418	233.256	0.0837234	1.08499	0.790188	0.0341034	3.57028e+06	1.47067e+06	4.92644e+06	6.13702e+06	8.18652e+06	5.4566e+06	2.68941e+06	6.93346e+06	8.35687e+06	9.52292e+06	2.35246e+06	1.4641e+06	4.29808e+06	2.11226e+06	2.77203e+06	4.5153e+06	4.00851e+06	6.55942e+06	3.90225e+06	2.61061e+06	2.90763e+06	4.53235e+06	7.3221e+06	5.72222e+06	3.00248e+06	2.99041e+06	3.45291e+06
2608pos		LPC(22:4)+H	LPC(22:4)+H	LPC	(22:4)	(22:4)				C30 H55 O7 N1 P1	572.371	106.509	0.00719168	1.12027	0.662955	0.177544	8.08624e+07	1.13737e+08	1.31729e+08	1.64041e+08	2.48825e+08	2.34975e+08	2.52481e+07	3.11957e+08	2.38144e+08	1.49294e+08	9.72038e+07	6.76889e+07	1.15546e+08	1.21989e+08	2.60995e+07	1.8088e+08	1.11994e+08	2.59458e+08	2.58895e+08	2.06905e+08	8.69593e+07	1.9763e+08	2.3096e+08	2.52964e+08	1.48884e+08	1.50759e+08	1.5075e+08
260pos		Cer(d34:1)+H-H2O	Cer(d34:1)+H-H2O	Cer	(d18:1_16:0)	(d18:1)	(16:0)			C34 H66 O2 N1	520.509	1313.87	0.231062	0.509416	0.218367	0.208429	129413	121658	5.49085e+06	2.62889e+07	9.32545e+06	1.04954e+07	1.94358e+07	4.80596e+06	6.89496e+06	3.78936e+06	2.68889e+06	141612	137591	3.67684e+06	391529	146423	1.95502e+06	2.51422e+06	9.37501e+06	5.62637e+06	2.3625e+06	4.20075e+06	2.91632e+06	3.9067e+06	8.10338e+06	5.25648e+06	5.9387e+06
2611pos		LPC(22:4)+H	LPC(22:4)+H	LPC	(22:4)	(22:4)				C30 H55 O7 N1 P1	572.371	161.314	0.123924	1.44	0.316169	0.0892202	8.12168e+06	2.79619e+06	8.93229e+06	4.76111e+06	6.22062e+06	8.81627e+06	1.22155e+06	7.92034e+06	7.05754e+06	5.96903e+06	4.57303e+06	1.08189e+06	4.31773e+06	3.30294e+06	1.50239e+06	4.64223e+06	1.33222e+07	1.12659e+07	6.42591e+06	4.77075e+06	2.32637e+06	1.42533e+07	5.00245e+06	1.26553e+07	7.2423e+06	7.43251e+06	9.02505e+06
2613pos		LPC(22:5)+Na	LPC(22:5)+Na	LPC	(22:5)	(22:5)				C30 H52 O7 N1 P1 Na1	592.337	92.1812	0.0116582	1.57345	0.145052	0.653253	4.98759e+07	6.73728e+07	5.23853e+07	1.52069e+08	1.64716e+08	1.60518e+08	2.28743e+07	2.52836e+08	2.08539e+08	6.59076e+07	4.03379e+07	4.47705e+07	7.20903e+07	1.24301e+08	1.29444e+07	1.32536e+08	6.9945e+07	2.85381e+08	2.01893e+08	1.97576e+08	1.15264e+08	1.76292e+08	2.077e+08	1.8008e+08	1.49284e+08	1.52368e+08	1.49383e+08
2614pos		LPC(22:5)+H	LPC(22:5)+H	LPC	(22:5)	(22:5)				C30 H53 O7 N1 P1	570.355	92.1812	0.00790854	1.32755	0.365797	0.931418	6.31493e+08	7.55916e+08	5.9643e+08	1.45062e+09	1.84217e+09	2.24578e+09	1.53474e+08	2.74998e+09	2.1802e+09	8.32446e+08	6.70944e+08	4.39161e+08	1.03509e+09	1.02127e+09	1.31971e+08	1.47486e+09	7.78723e+08	2.79167e+09	2.05766e+09	1.86744e+09	7.15441e+08	1.70082e+09	1.85723e+09	2.50575e+09	1.34353e+09	1.34353e+09	1.36202e+09
2623pos		LPC(22:6)+Na	LPC(22:6)+Na	LPC	(22:6)	(22:6)				C30 H50 O7 N1 P1 Na1	590.322	81.5155	0.0354222	1.06934	0.715753	0.539713	3.59173e+08	2.15691e+08	6.39214e+08	4.02612e+08	4.34219e+08	4.80504e+08	2.74238e+08	4.45158e+08	4.36594e+08	5.44175e+08	6.44593e+08	2.12827e+08	2.32038e+08	6.40491e+08	2.01849e+08	5.80916e+08	4.92276e+08	3.65639e+08	3.84258e+08	4.54505e+08	5.35257e+08	4.52844e+08	3.98259e+08	3.86043e+08	4.68882e+08	4.69858e+08	4.98756e+08
2624pos		LPC(22:6)+H	LPC(22:6)+H	LPC	(22:6)	(22:6)				C30 H51 O7 N1 P1	568.34	81.5155	0.00476483	1.06813	0.789683	1.59863	8.20787e+09	4.04053e+09	1.20124e+10	1.04683e+10	1.09105e+10	1.39965e+10	1.9273e+09	1.30397e+10	1.42207e+10	6.90449e+09	8.84601e+09	4.01894e+09	6.10752e+09	8.31045e+09	2.14623e+09	9.98637e+09	1.17083e+10	1.11669e+10	1.11332e+10	1.05381e+10	4.7753e+09	9.23813e+09	1.01513e+10	1.66077e+10	9.21092e+09	9.14854e+09	9.23306e+09
262neg		Cer(d12:0_26:1)+HCOO	Cer(d38:1)+HCOO	Cer	(d12:0_26:1)	(d12:0)	(26:1)			C39 H76 O5 N1	638.573	1286.62	0.171653	1.12333	0.731325	0.236709	5.67062e+06	1.51663e+07	1.02678e+07	3.02331e+06	4.87482e+06	2.06443e+06	3.24598e+06	5.37225e+06	3.72532e+06	3.36267e+06	200555	1.25494e+07	5.37962e+06	7.6188e+06	6.75019e+06	4.946e+06	7.09023e+06	1.32333e+07	9.50925e+06	7.56774e+06	4.82673e+06	1.06073e+07	1.39694e+07	2.05811e+07	5.02724e+06	3.57042e+06	4.66877e+06
2638pos		LPC(22:6)+H	LPC(22:6)+H	LPC	(22:6)	(22:6)				C30 H51 O7 N1 P1	568.34	146.28	0.747588	1.1436	0.742595	0.0474612	1.51537e+06	2.42275e+06	3.73784e+07	1.02435e+06	1.05091e+06	1.06635e+06	221560	933623	8.79307e+07	748604	1.05644e+06	252121	1.93739e+06	689170	390452	1.0401e+06	7.8705e+07	538244	673599	1.09475e+06	355093	1.01591e+06	2.32648e+06	4.6493e+06	2.88695e+06	9.61265e+06	2.97821e+06
263neg		Cer(d18:2_20:0)-H	Cer(d38:2)-H	Cer	(d18:2_20:0)	(d18:2)	(20:0)			C38 H72 O3 N1	590.552	711.704	0.0158947	0.927473	0.605159	0.103324	3.17082e+07	2.31802e+07	2.66392e+07	2.21611e+07	2.73307e+07	2.57138e+07	1.70134e+07	8.36959e+06	2.77119e+07	2.18525e+07	7.36094e+06	2.29149e+07	2.74942e+07	2.48857e+07	2.53193e+07	2.26585e+07	2.68486e+07	3.14419e+07	2.62043e+07	1.90751e+07	2.19982e+07	2.24228e+07	2.47941e+07	2.61891e+07	1.447e+07	1.48722e+07	1.48793e+07
2640pos		LPC(22:6)+H	LPC(22:6)+H	LPC	(22:6)	(22:6)				C30 H51 O7 N1 P1	568.34	196.4	0.0820116	1.06891	0.83035	0.0889072	1.309e+07	1.29067e+07	1.0906e+07	9.2165e+06	1.11858e+07	1.29508e+07	1.49004e+06	1.5074e+07	7.34232e+06	5.92847e+06	7.74213e+06	3.1016e+06	4.87949e+06	4.83011e+06	5.12867e+06	8.27947e+06	7.93554e+06	1.23588e+07	7.56177e+06	1.1549e+07	3.93002e+06	1.60052e+07	5.08356e+06	1.19327e+07	9.17199e+06	7.9556e+06	9.23331e+06
2645pos		LPC(22:6)+Na	LPC(22:6)+Na	LPC	(22:6)	(22:6)				C30 H50 O7 N1 P1 Na1	590.322	270.485	0.0416668	0.843771	0.704363	0.0734087	3.60039e+06	1.21244e+06	3.471e+06	3.97458e+06	2.45053e+06	3.83175e+06	302577	3.20402e+06	5.03381e+06	436121	3.18544e+06	346290	1.01895e+06	635059	468197	1.63156e+06	1.74211e+06	2.95427e+06	4.12338e+06	3.37164e+06	169355	1.56204e+06	1.55455e+06	7.90988e+06	2.53356e+06	2.35353e+06	2.53033e+06
264neg		Cer(d18:2_20:0)+HCOO	Cer(d38:2)+HCOO	Cer	(d18:2_20:0)	(d18:2)	(20:0)			C39 H74 O5 N1	636.557	711.704	0.0166925	0.956819	0.777657	0.638141	1.0725e+09	8.58933e+08	1.04921e+09	8.27356e+08	9.54106e+08	8.71275e+08	5.75623e+08	2.80508e+08	1.04852e+09	8.49993e+08	2.48964e+08	8.32225e+08	1.0553e+09	8.68867e+08	7.50475e+08	9.03508e+08	1.02535e+09	1.21481e+09	9.51918e+08	7.0544e+08	7.89149e+08	8.31807e+08	9.17222e+08	9.29255e+08	5.30576e+08	5.46055e+08	5.46377e+08
265pos		Cer(d18:2_16:0)+H	Cer(d34:2)+H	Cer	(d18:2_16:0)	(d18:2)	(16:0)			C34 H66 O3 N1	536.504	431.644	0.139665	0.990861	0.98084	0.0849711	1.00773e+07	3.65459e+06	9.00008e+06	1.55316e+07	9.65399e+06	2.35979e+07	4.10248e+06	6.78544e+06	7.3384e+06	1.16006e+07	9.9794e+06	3.31072e+06	3.53735e+06	5.59103e+06	5.49166e+06	7.50243e+06	8.28808e+06	2.11311e+07	1.47977e+07	1.92604e+07	6.10348e+06	1.38476e+07	1.46017e+07	1.78321e+07	5.67734e+06	5.37733e+06	4.31549e+06
2671pos		LPC(24:0)+H	LPC(24:0)+H	LPC	(24:0)	(24:0)				C32 H67 O7 N1 P1	608.465	453.036	0.0103039	1.21692	0.615299	0.118748	9.30513e+06	4.07838e+06	8.99223e+06	1.59354e+07	9.25137e+06	1.2375e+07	1.69946e+07	9.51388e+06	9.56125e+06	1.15654e+07	1.04373e+07	3.15986e+06	3.17213e+06	1.09638e+07	7.98258e+06	7.70813e+06	1.2157e+07	8.27228e+06	7.40623e+06	1.11671e+07	2.36365e+07	8.45184e+06	5.16642e+06	1.02416e+07	7.489e+06	7.62286e+06	7.48784e+06
2685pos		LPC(36:0)+Na	LPC(36:0)+Na	LPC	(36:0)	(36:0)				C44 H90 O7 N1 P1 Na1	798.635	808.664	0.0932359	1.88643	0.0134398	0.605677	1.63472e+07	1.78346e+07	5.43864e+06	2.58644e+07	1.89069e+07	1.70732e+07	1.21975e+07	5.42044e+07	3.12048e+07	4.32015e+07	8.73441e+06	2.55707e+07	4.2825e+07	1.71983e+07	9.9605e+06	2.66484e+07	1.62588e+07	7.16936e+07	4.10837e+07	3.45183e+07	2.7587e+07	4.79384e+07	6.45043e+07	7.64777e+07	1.48665e+07	1.79039e+07	1.62079e+07
2699pos		LPE(16:1e)+H	LPE(16:1e)+H	LPE	(16:1e)	(16:1e)				C21 H45 O6 N1 P1	438.298	130.311	0.00572896	1.08446	0.696629	0.201678	1.56616e+08	1.50622e+08	1.89882e+08	1.73054e+08	2.15383e+08	2.53419e+08	1.31385e+08	2.63154e+08	2.08121e+08	1.90799e+08	1.67632e+08	5.05436e+07	1.67235e+08	1.14433e+08	7.89711e+07	1.96361e+08	2.01611e+08	2.42559e+08	1.84185e+08	1.86994e+08	1.06955e+08	1.65778e+08	1.87532e+08	2.71156e+08	1.53936e+08	1.55479e+08	1.53958e+08
2700pos		LPE(16:1e)+Na	LPE(16:1e)+Na	LPE	(16:1e)	(16:1e)				C21 H44 O6 N1 P1 Na1	460.28	130.311	0.0129326	1.30952	0.266472	0.12089	1.37012e+07	1.25625e+07	1.65912e+07	1.58592e+07	2.43538e+07	2.44042e+07	9.91449e+06	3.20501e+07	2.61318e+07	1.64899e+07	1.54425e+07	5.76645e+06	1.74312e+07	1.18235e+07	5.04129e+06	1.72546e+07	1.88547e+07	3.1988e+07	2.21796e+07	2.25774e+07	1.0014e+07	2.24304e+07	2.4577e+07	2.77934e+07	2.00827e+07	2.05554e+07	2.01235e+07
270neg		Cer(d18:1_21:0)-H	Cer(d39:1)-H	Cer	(d18:1_21:0)	(d18:1)	(21:0)			C39 H76 O3 N1	606.583	814.04	0.0153632	0.809278	0.0989176	0.538477	1.57768e+07	1.4387e+07	1.40578e+07	1.06347e+07	1.27063e+07	1.31951e+07	4.9945e+06	6.59586e+06	1.50513e+07	1.53852e+07	2.90661e+06	1.37254e+07	1.50233e+07	1.37262e+07	9.12733e+06	1.33894e+07	1.28499e+07	1.28396e+07	1.66146e+07	1.34888e+07	8.22067e+06	1.29794e+07	1.39501e+07	1.79529e+07	5.83412e+06	5.83104e+06	5.98915e+06
271neg		Cer(d18:1_21:0)+HCOO	Cer(d39:1)+HCOO	Cer	(d18:1_21:0)	(d18:1)	(21:0)			C40 H78 O5 N1	652.589	814.04	0.0171097	0.800094	0.114461	3.67538	6.72453e+08	6.13194e+08	7.48384e+08	4.33999e+08	5.47668e+08	5.69903e+08	1.82105e+08	2.40188e+08	6.14016e+08	6.48489e+08	1.27532e+08	5.98435e+08	6.75625e+08	5.88214e+08	4.13472e+08	5.9562e+08	5.57261e+08	5.43079e+08	7.01689e+08	5.74328e+08	3.45794e+08	5.36623e+08	6.02539e+08	7.77957e+08	2.55649e+08	2.48081e+08	2.55511e+08
2731pos		LPE(18:0)+Na	LPE(18:0)+Na	LPE	(18:0)	(18:0)				C23 H48 O7 N1 P1 Na1	504.306	157.348	0.00805248	1.22296	0.336399	0.147834	8.19017e+07	5.99597e+07	9.44811e+07	1.142e+08	1.26882e+08	1.49313e+08	4.72088e+07	1.45621e+08	1.72826e+08	1.21704e+08	6.99337e+07	5.21917e+07	8.2042e+07	8.87167e+07	3.56531e+07	1.14249e+08	1.12557e+08	1.80467e+08	1.23027e+08	1.47004e+08	7.73636e+07	1.35664e+08	1.53073e+08	1.80293e+08	1.26152e+08	1.27922e+08	1.27932e+08
2732pos		LPE(18:0)+H	LPE(18:0)+H	LPE	(18:0)	(18:0)				C23 H49 O7 N1 P1	482.324	157.348	0.0107626	1.02778	0.902232	0.991232	9.69093e+08	1.01586e+09	1.17471e+09	1.49177e+09	1.73409e+09	2.33037e+09	5.6879e+08	1.80674e+09	1.53282e+09	1.55163e+09	8.75704e+08	5.06262e+08	1.03611e+09	1.00352e+09	4.61028e+08	1.56913e+09	1.48819e+09	1.81985e+09	1.21018e+09	1.54172e+09	8.4073e+08	1.43728e+09	1.63955e+09	2.153e+09	1.17883e+09	1.17882e+09	1.15698e+09
2738pos		LPE(18:1)+Na	LPE(18:1)+Na	LPE	(18:1)	(18:1)				C23 H46 O7 N1 P1 Na1	502.29	122.234	0.0353994	1.49928	0.148729	0.276874	2.43834e+07	2.48143e+07	2.90976e+07	3.18541e+07	3.22169e+07	3.39834e+07	1.56531e+07	8.78265e+07	3.8892e+07	2.7558e+07	2.01571e+07	2.13343e+07	3.80522e+07	2.12771e+07	1.17516e+07	3.22385e+07	3.23452e+07	4.60135e+07	3.86192e+07	3.99066e+07	2.35113e+07	3.59668e+07	3.62901e+07	4.37336e+07	3.62477e+07	3.41129e+07	3.41121e+07
2746pos		LPE(18:1e)+H	LPE(18:1e)+H	LPE	(18:1e)	(18:1e)				C23 H49 O6 N1 P1	466.329	188.097	0.0141981	1.03992	0.88329	0.419268	2.27364e+08	2.29066e+08	3.30901e+08	3.26956e+08	4.65069e+08	6.3598e+08	1.00873e+08	5.75637e+08	4.66462e+08	4.19326e+08	1.96712e+08	1.26562e+08	2.90596e+08	1.81e+08	7.54404e+07	3.66087e+08	2.4516e+08	5.36193e+08	3.30185e+08	3.33501e+08	1.5534e+08	3.49457e+08	3.8703e+08	6.47951e+08	2.93285e+08	3.00622e+08	3.00614e+08
2747pos		LPE(18:1e)+Na	LPE(18:1e)+Na	LPE	(18:1e)	(18:1e)				C23 H48 O6 N1 P1 Na1	488.311	188.097	0.00748419	1.10559	0.758926	0.0949327	6.36375e+07	4.0754e+07	8.57735e+07	6.39414e+07	1.00495e+08	1.37847e+08	1.74397e+07	1.23009e+08	1.29736e+08	8.31321e+07	4.26667e+07	2.39256e+07	5.17159e+07	3.15457e+07	1.11441e+07	6.45451e+07	4.82001e+07	1.48631e+08	6.57445e+07	7.79696e+07	2.37374e+07	7.12811e+07	8.12412e+07	1.56579e+08	7.39883e+07	7.49454e+07	7.49658e+07
2752pos		LPE(18:1p)+H	LPE(18:1p)+H	LPE	(18:1p)	(18:1p)				C23 H47 O6 N1 P1	464.314	148.851	0.00950404	1.01826	0.935728	0.304035	1.03689e+08	9.6748e+07	1.396e+08	1.16913e+08	1.37025e+08	1.3466e+08	5.84735e+07	1.75777e+08	1.40211e+08	1.29097e+08	1.13958e+08	3.21248e+07	9.22149e+07	6.30092e+07	4.29526e+07	1.23097e+08	1.35371e+08	1.49522e+08	1.41307e+08	1.24475e+08	5.37008e+07	9.97093e+07	1.12293e+08	1.78546e+08	9.80503e+07	9.96713e+07	9.9693e+07
2753pos		LPE(18:1p)+H	LPE(18:1p)+H	LPE	(18:1p)	(18:1p)				C23 H47 O6 N1 P1	464.314	176.057	0.0422536	1.12199	0.647446	0.0627331	2.66863e+07	2.99339e+07	4.04577e+07	4.80292e+07	4.79904e+07	5.86377e+07	1.30381e+07	5.74249e+07	4.31927e+07	2.31399e+07	2.87818e+07	1.28456e+07	2.88235e+07	2.43643e+07	1.32993e+07	3.53935e+07	4.50727e+07	4.53515e+07	3.28087e+07	5.16221e+07	1.87001e+07	3.40614e+07	4.60471e+07	6.88332e+07	3.2381e+07	3.48265e+07	3.49156e+07
2756pos		LPE(18:2e)+Na	LPE(18:2e)+Na	LPE	(18:2e)	(18:2e)				C23 H46 O6 N1 P1 Na1	486.295	142.984	0.0113835	1.25518	0.391281	0.0606198	9.52992e+06	8.58952e+06	1.3559e+07	1.24536e+07	1.71444e+07	1.53863e+07	4.92419e+06	2.40358e+07	2.04356e+07	1.25708e+07	1.25826e+07	4.28326e+06	1.10345e+07	7.5249e+06	3.38812e+06	1.18865e+07	1.3574e+07	2.24889e+07	1.70633e+07	1.81867e+07	5.36077e+06	1.44583e+07	1.68076e+07	2.17958e+07	1.46888e+07	1.49798e+07	1.49848e+07
275neg		Cer(d18:2_21:0)-H	Cer(d39:2)-H	Cer	(d18:2_21:0)	(d18:2)	(21:0)			C39 H74 O3 N1	604.567	739.74	0.00947503	0.904339	0.522943	0.199546	7.58337e+06	5.55483e+06	6.08229e+06	4.28624e+06	5.13886e+06	4.61615e+06	2.09015e+06	2.48788e+06	6.74442e+06	6.46739e+06	1.36171e+06	5.39587e+06	7.90032e+06	5.20019e+06	4.4741e+06	5.83982e+06	6.26386e+06	5.40842e+06	6.01464e+06	6.3267e+06	3.60821e+06	5.17199e+06	5.43617e+06	6.53099e+06	4.50667e+06	4.43156e+06	4.50341e+06
2761pos		LPE(20:1e)+Na	LPE(20:1e)+Na	LPE	(20:1e)	(20:1e)				C25 H52 O6 N1 P1 Na1	516.342	283.119	0.019192	1.52856	0.117163	0.129195	1.36936e+06	2.80591e+06	2.12995e+06	3.98049e+06	4.89649e+06	7.72356e+06	534855	8.11246e+06	6.46564e+06	4.73299e+06	984131	1.957e+06	4.60873e+06	3.16499e+06	470475	5.29312e+06	2.2433e+06	1.04042e+07	4.80804e+06	4.84573e+06	3.26545e+06	5.84904e+06	8.91495e+06	1.02171e+07	4.34863e+06	4.50196e+06	4.3636e+06
2762pos		LPE(22:6)+Na	LPE(22:6)+Na	LPE	(22:6)	(22:6)				C27 H44 O7 N1 P1 Na1	548.275	87.7895	0.072834	1.0787	0.328459	0.321554	8.80293e+07	8.1113e+07	9.54864e+07	5.50761e+07	9.72485e+07	8.13223e+07	5.59139e+07	7.95662e+07	6.55656e+07	8.31648e+07	6.97274e+07	6.71604e+07	1.04037e+08	7.27702e+07	6.80904e+07	6.17156e+07	8.8272e+07	9.27243e+07	8.76568e+07	6.56729e+07	7.94571e+07	7.81589e+07	1.02888e+08	1.10876e+08	8.03906e+07	8.75552e+07	9.30244e+07
2767pos		LPE(22:6)+H	LPE(22:6)+H	LPE	(22:6)	(22:6)				C27 H45 O7 N1 P1	526.293	149.88	0.415245	1.11345	0.913225	0.0411593	654261	1.01808e+07	1.75843e+06	511716	770222	1.12442e+06	779770	1.25418e+06	902705	366973	460537	287726	1.74528e+06	349834	331381	567866	1.39359e+06	1.02276e+07	511854	651315	386760	425174	705255	1.12273e+06	2.02776e+06	4.12793e+06	2.22443e+06
2775pos		LPE(22:6)+H	LPE(22:6)+H	LPE	(22:6)	(22:6)				C27 H45 O7 N1 P1	526.293	671.294	0.0645241	1.16879	0.273289	0.0716297	5.00235e+07	4.21148e+07	4.6175e+07	4.54399e+07	5.98558e+07	5.41064e+07	1.46547e+07	7.32008e+07	6.20537e+07	4.65077e+07	4.31441e+07	4.46882e+07	4.57695e+07	4.46515e+07	3.02571e+07	6.31754e+07	4.64926e+07	6.79433e+07	7.50915e+07	5.42653e+07	4.30784e+07	6.91991e+07	7.75863e+07	6.06611e+07	4.39858e+07	4.93087e+07	4.43975e+07
2777pos		LPE(22:6)+H	LPE(22:6)+H	LPE	(22:6)	(22:6)				C27 H45 O7 N1 P1	526.293	733.938	0.0330119	1.46302	0.0274208	0.240198	8.43969e+06	8.4091e+06	6.38829e+06	1.0003e+07	1.17115e+07	9.21728e+06	887420	1.64589e+07	1.31933e+07	9.06604e+06	4.86382e+06	1.08365e+07	1.8083e+07	6.72459e+06	3.48089e+06	1.02999e+07	7.56051e+06	1.86829e+07	1.34951e+07	1.12086e+07	7.3546e+06	1.43399e+07	1.68641e+07	2.04255e+07	6.69253e+06	7.09039e+06	7.09033e+06
2785pos		LPG(16:2e)+H	LPG(16:2e)+H	LPG	(16:2e)	(16:2e)				C22 H44 O8 N0 P1	467.277	94.2531	0.0127458	0.705509	0.263989	0.268166	1.31372e+07	6.9187e+06	1.90878e+07	1.19745e+07	1.77112e+07	2.38504e+07	7.76496e+06	1.48275e+07	1.21264e+07	1.87626e+07	1.1539e+07	5.7341e+06	8.64514e+06	1.13609e+07	8.2597e+06	2.0929e+07	1.58991e+07	1.09696e+07	7.93824e+06	1.17509e+07	6.61667e+06	6.18125e+06	9.84631e+06	2.28332e+07	9.90083e+06	9.68605e+06	9.68481e+06
2786pos		LPG(18:0)+H	LPG(18:0)+H	LPG	(18:0)	(18:0)				C24 H50 O9 N0 P1	513.319	130.519	0.00256609	1.30919	0.248628	0.0887998	6.30444e+06	4.1075e+06	8.25657e+06	4.65173e+06	5.57774e+06	7.46135e+06	2.35818e+06	6.43039e+06	4.9875e+06	5.17106e+06	5.00601e+06	1.58511e+06	5.22641e+06	3.5546e+06	2.23114e+06	5.66719e+06	7.41816e+06	7.91292e+06	4.25231e+06	6.65956e+06	2.34137e+06	6.71457e+06	8.23479e+06	8.33121e+06	4.65374e+06	4.67447e+06	4.65377e+06
2788pos		LPG(18:2)+H	LPG(18:2)+H	LPG	(18:2)	(18:2)				C24 H46 O9 N0 P1	509.287	75.749	0.0359957	0.991557	0.961751	0.127176	1.10638e+07	7.82736e+06	1.90063e+07	1.05958e+07	1.71232e+07	1.72093e+07	8.6036e+06	1.15299e+07	1.57968e+07	1.10871e+07	1.18325e+07	6.64961e+06	1.12682e+07	1.3575e+07	1.12986e+07	2.39304e+07	1.94612e+07	1.51428e+07	1.38503e+07	2.06353e+07	1.23312e+07	1.45287e+07	8.32336e+06	2.50051e+07	1.17912e+07	1.18687e+07	1.25801e+07
278neg		Cer(d16:0_24:0)+HCOO	Cer(d40:0)+HCOO	Cer	(d16:0_24:0)	(d16:0)	(24:0)			C41 H82 O5 N1	668.62	861.02	0.0124697	0.970399	0.892171	0.603268	6.06794e+07	7.16198e+07	5.25966e+07	5.87787e+07	5.47745e+07	7.48274e+07	5.90103e+07	2.12274e+07	7.38296e+07	8.73315e+07	1.09233e+07	7.49264e+07	6.68146e+07	6.06874e+07	9.33463e+07	5.19983e+07	4.5294e+07	6.31287e+07	6.63565e+07	6.14421e+07	1.31449e+08	7.65175e+07	5.79757e+07	5.99187e+07	4.15905e+07	4.06993e+07	4.15918e+07
2793pos		LPI(18:0)+H	LPI(18:0)+H	LPI	(18:0)	(18:0)				C27 H54 O12 N0 P1	601.335	130.26	0.0169844	0.821284	0.261086	0.270661	1.2257e+07	1.03175e+07	1.05447e+07	1.42773e+07	1.45166e+07	1.09627e+07	1.78104e+07	1.1551e+07	1.1189e+07	1.98024e+07	1.40922e+07	7.14958e+06	7.31641e+06	1.21017e+07	3.88204e+06	1.36943e+07	1.07402e+07	9.96881e+06	1.20701e+07	1.07865e+07	1.09071e+07	1.11218e+07	1.05825e+07	8.61699e+06	1.11806e+07	1.11801e+07	1.08546e+07
2794pos		LPI(20:4)+H	LPI(20:4)+H	LPI	(20:4)	(20:4)				C29 H50 O12 N0 P1	621.303	71.1067	0.0998337	0.743553	0.247938	0.291235	1.24972e+07	1.02955e+07	1.20816e+07	1.30309e+07	2.20765e+07	2.50587e+07	2.44854e+06	1.67282e+07	1.81062e+07	1.1024e+07	8.10188e+06	1.08584e+07	1.14628e+07	9.00914e+06	2.96789e+06	1.30496e+07	1.06731e+07	1.28202e+07	1.21204e+07	1.23861e+07	3.99615e+06	9.93524e+06	1.30431e+07	2.28642e+07	1.46263e+07	1.22303e+07	1.46151e+07
2799pos		MG(16:1e)+Na	MG(16:1e)+Na	MG	(16:1e)	(16:1e)				C19 H38 O3 Na1	337.271	93.0361	0.0455528	0.853399	0.55845	0.239259	3.17592e+07	1.02026e+07	4.81651e+07	2.63889e+07	2.84375e+07	3.55183e+07	6.22847e+06	3.54189e+07	3.05839e+07	2.4797e+07	1.48172e+07	1.44147e+07	2.17486e+07	1.56321e+07	4.73981e+06	3.95265e+07	3.05957e+07	8.68937e+06	2.06243e+07	1.74678e+07	1.17188e+07	2.06727e+07	1.61022e+07	2.92771e+07	1.98193e+07	1.97799e+07	2.14036e+07
2807pos		MG(18:2e)+H	MG(18:2e)+H	MG	(18:2e)	(18:2e)				C21 H41 O3	341.305	178.338	0.0489966	1.00922	0.958792	0.190671	2.18559e+07	3.16513e+07	1.9638e+07	3.12525e+07	3.38567e+07	4.95598e+07	1.30944e+07	3.64893e+07	3.29296e+07	3.29466e+07	1.88778e+07	1.31039e+07	2.95464e+07	2.17559e+07	1.29639e+07	3.16227e+07	3.30699e+07	3.71989e+07	2.76598e+07	2.28217e+07	1.99293e+07	3.16814e+07	3.56731e+07	4.58126e+07	2.49215e+07	2.49261e+07	2.71005e+07
2810pos		MG(18:2e)+H	MG(18:2e)+H	MG	(18:2e)	(18:2e)				C21 H41 O3	341.305	783.54	0.0433174	1.29983	0.180187	0.0885033	4.15657e+07	2.16418e+07	2.00006e+07	3.80105e+07	1.98469e+07	2.0005e+07	5.72983e+07	2.31215e+07	1.99532e+07	3.10376e+07	3.63616e+07	1.72948e+07	1.58486e+07	2.00714e+07	4.33309e+07	1.98503e+07	2.44658e+07	2.61079e+07	1.98868e+07	3.19115e+07	4.2888e+07	3.67837e+07	2.38548e+07	2.96489e+07	1.79349e+07	1.81411e+07	1.94142e+07
2827pos		MGDG(41:9)+H	MGDG(41:9)+H	MGDG	(41:9)	(41:9)				C50 H79 O10	839.567	346.357	0.0126749	0.557996	0.153415	0.630339	7.00364e+07	1.9508e+07	5.52498e+07	4.05524e+07	2.63676e+07	4.75219e+07	4.51685e+07	1.04398e+07	5.33021e+06	5.91199e+07	6.34368e+07	2.62831e+07	3.4395e+06	6.58574e+07	2.98991e+07	8.16906e+07	6.51641e+07	7.16198e+06	4.90369e+07	2.81952e+07	4.9935e+07	4.70451e+07	9.1109e+06	4.52414e+07	2.96192e+07	3.02769e+07	2.96245e+07
282neg		Cer(d18:1_22:0)-H	Cer(d40:1)-H	Cer	(d18:1_22:0)	(d18:1)	(22:0)			C40 H78 O3 N1	620.599	841.542	0.0118903	0.838968	0.179035	0.622137	3.58905e+07	4.03191e+07	3.35543e+07	3.67265e+07	3.50651e+07	4.14538e+07	1.68893e+07	1.3235e+07	3.93197e+07	3.46941e+07	8.77423e+06	3.73798e+07	4.17351e+07	3.55708e+07	2.52251e+07	3.54237e+07	3.28167e+07	3.83114e+07	4.01592e+07	3.70439e+07	3.03827e+07	3.3324e+07	3.51951e+07	4.44175e+07	2.01061e+07	2.05217e+07	2.05301e+07
2835pos		PA(16:0_22:6)+NH4	PA(38:6)+NH4	PA	(16:0_22:6)	(16:0)	(22:6)			C41 H73 O8 N1 P1	738.507	522.471	0.00259754	1.43532	0.0105632	0.329901	5.39255e+07	1.67729e+07	5.71336e+07	5.89541e+07	2.60613e+07	3.09004e+07	6.76586e+07	4.28409e+07	3.56405e+07	3.31145e+07	5.91753e+07	1.95176e+07	3.35631e+07	3.76652e+07	5.83276e+07	4.55411e+07	7.28494e+07	3.35537e+07	3.09065e+07	4.6359e+07	4.48777e+07	4.04015e+07	3.05016e+07	4.45319e+07	3.65699e+07	3.67346e+07	3.65697e+07
283neg		Cer(d40:1)+HCOO	Cer(d40:1)+HCOO	Cer	(d18:1_22:0)	(d18:1)	(22:0)			C41 H80 O5 N1	666.604	841.542	0.0060773	0.867793	0.271453	2.97239	1.50047e+09	1.60141e+09	1.37662e+09	1.56355e+09	1.4452e+09	1.61524e+09	7.13515e+08	5.54932e+08	1.63823e+09	1.4581e+09	3.69533e+08	1.62277e+09	1.77912e+09	1.50831e+09	1.0918e+09	1.55389e+09	1.46441e+09	1.57715e+09	1.66987e+09	1.57901e+09	1.30436e+09	1.41503e+09	1.53759e+09	1.8944e+09	8.49208e+08	8.59435e+08	8.55916e+08
2840pos		PA(40:6e)+NH4	PA(40:6e)+NH4	PA	(40:6e)	(40:6e)				C43 H79 O7 N1 P1	752.559	677.627	0.0419801	1.39199	0.0912141	0.753546	2.44581e+08	1.74659e+08	2.09723e+08	4.79145e+08	3.10142e+08	1.52017e+08	2.03697e+08	3.46141e+08	3.25779e+08	2.89601e+08	3.00665e+08	2.00116e+08	1.94266e+08	3.55945e+08	2.58927e+08	2.32058e+08	2.88828e+08	3.95075e+08	3.42556e+08	3.3941e+08	4.70079e+08	3.73263e+08	2.66139e+08	2.54791e+08	2.31572e+08	2.49056e+08	2.49473e+08
2844pos		PA(41:4)+NH4	PA(41:4)+NH4	PA	(41:4)	(41:4)				C44 H83 O8 N1 P1	784.585	709.978	0.0447443	1.02517	0.854576	0.337222	1.09457e+08	7.26338e+07	7.05887e+07	5.68022e+07	6.61016e+07	7.36224e+07	1.95737e+08	6.32684e+07	5.93025e+07	6.32171e+07	9.19731e+07	5.35581e+07	5.17394e+07	4.77018e+07	1.18249e+08	6.97886e+07	7.74555e+07	5.33865e+07	7.2519e+07	5.79651e+07	1.08047e+08	6.63527e+07	6.89669e+07	5.93159e+07	5.09287e+07	5.23571e+07	5.55553e+07
2847pos		PA(42:10e)+NH4	PA(42:10e)+NH4	PA	(42:10e)	(42:10e)				C45 H75 O7 N1 P1	772.528	552.12	0.0548518	0.968374	0.89114	0.561306	3.32226e+08	1.34321e+08	3.85418e+08	1.71076e+08	2.20961e+08	8.23572e+07	1.4627e+08	2.41816e+08	1.89989e+08	1.8726e+08	3.36369e+08	1.26427e+08	1.11733e+08	1.36092e+08	1.73651e+08	2.46301e+08	3.03191e+08	1.98992e+08	3.02328e+08	1.86051e+08	1.04368e+08	1.50848e+08	2.12575e+08	1.59025e+08	2.04811e+08	2.2493e+08	2.04855e+08
2857pos		PA(47:4)+NH4	PA(47:4)+NH4	PA	(47:4)	(47:4)				C50 H95 O8 N1 P1	868.679	774.266	0.0718607	1.19464	0.411678	0.0277783	4.02654e+07	1.87452e+07	1.82451e+07	5.1826e+07	1.96481e+07	1.76033e+07	4.30609e+07	2.29384e+07	2.92464e+07	4.33123e+07	1.70403e+07	1.49354e+07	2.07715e+07	1.66898e+07	2.9289e+07	1.7788e+07	3.41159e+07	3.26e+07	2.29906e+07	1.98872e+07	3.92432e+07	2.75523e+07	2.08407e+07	2.74987e+07	1.56981e+07	1.78266e+07	1.7831e+07
285pos		Cer(d34:2+O)+H-H2O	Cer(d34:2+O)+H-H2O	Cer	(d34:2+O)	(d34:2+O)				C34 H64 O3 N1	534.488	486.305	0.0157018	1.21095	0.617262	0.0277569	1.7024e+06	1.25812e+06	5.56594e+06	8.52996e+06	1.21943e+07	8.57706e+06	9.2756e+06	7.48132e+06	6.12088e+06	1.02931e+07	8.13037e+06	1.31904e+06	1.48733e+06	6.84928e+06	2.39272e+06	5.47415e+06	5.15717e+06	1.4326e+07	4.53972e+06	8.90165e+06	6.42843e+06	6.09975e+06	1.04129e+07	5.72846e+06	9.20403e+06	9.4668e+06	9.45032e+06
2864pos		PC(4:0_12:1)+Na	PC(16:1)+Na	PC	(4:0_12:1)	(4:0)	(12:1)			C24 H46 O8 N1 P1 Na1	530.285	94.3549	0.183706	1.67754	0.0384076	0.209773	6.14195e+06	3.81496e+06	2.89903e+06	1.62005e+07	7.16462e+06	1.15309e+07	3.86683e+06	1.24942e+07	1.09038e+07	6.49003e+06	8.66296e+06	3.67204e+06	5.28887e+06	1.65064e+07	2.02632e+06	6.22408e+06	1.07771e+07	1.6876e+07	9.24933e+06	1.41358e+07	1.05639e+07	1.26629e+07	1.24399e+07	1.07339e+07	4.1837e+06	3.16916e+06	3.01516e+06
2874pos		PC(12:0e_6:0)+H	PC(18:0e)+H	PC	(12:0e_6:0)	(12:0e)	(6:0)			C26 H55 O7 N1 P1	524.371	267.72	0.284931	4.59488	0.344052	0.493925	7.75599e+06	5.79912e+06	1.81377e+07	1.17364e+07	6.51182e+06	6.30791e+06	5.20895e+06	7.73841e+06	1.51872e+07	5.81877e+06	8.58602e+06	4.65576e+06	5.67407e+06	9.90139e+06	1.44942e+07	6.54828e+06	1.51537e+07	8.03158e+06	1.01055e+07	7.87201e+06	4.04027e+06	6.47205e+06	1.48158e+08	2.21861e+07	1.48129e+07	9.14958e+06	9.48668e+06
2878pos		PC(10:0e_8:0)+H	PC(18:0e)+H	PC	(10:0e_8:0)	(10:0e)	(8:0)			C26 H55 O7 N1 P1	524.371	1322.14	0.367693	1.89068	0.290483	0.373898	3.80611e+06	2.76362e+07	1.82359e+07	2.10193e+07	9.35892e+07	1.28345e+07	6.59719e+06	1.13673e+08	2.27251e+07	2.32924e+07	1.55722e+08	2.89644e+06	1.37659e+06	1.68331e+07	3.6141e+07	2.48333e+06	3.55159e+07	2.26627e+07	2.1187e+07	6.77394e+07	1.67072e+07	8.05644e+07	1.08053e+08	5.88623e+07	9.42443e+06	2.00417e+07	1.96493e+07
2890pos		PC(8:1e_10:1)+H	PC(18:2e)+H	PC	(8:1e_10:1)	(8:1e)	(10:1)			C26 H51 O7 N1 P1	520.34	90.4272	0.0128515	0.784647	0.461768	3.4198	3.35692e+09	6.8568e+08	5.41278e+09	3.14028e+09	5.42316e+09	6.26864e+09	1.59056e+09	4.25704e+09	3.76623e+09	5.19603e+09	3.55752e+09	1.21249e+09	1.82509e+09	2.20731e+09	1.45284e+09	3.30239e+09	4.23813e+09	3.22236e+09	3.01838e+09	3.35355e+09	2.08656e+09	3.0847e+09	2.63301e+09	5.12521e+09	3.10674e+09	3.10675e+09	3.17641e+09
2891pos		PC(8:1e_10:1)+Na	PC(18:2e)+Na	PC	(8:1e_10:1)	(8:1e)	(10:1)			C26 H50 O7 N1 P1 Na1	542.322	90.4272	0.00997464	0.906304	0.743611	0.711248	2.31348e+08	8.04691e+07	3.48783e+08	2.58982e+08	3.61212e+08	3.30806e+08	2.7291e+08	2.60185e+08	2.60131e+08	4.70136e+08	3.19463e+08	7.48356e+07	1.00889e+08	2.23133e+08	1.55521e+08	2.43115e+08	3.11478e+08	2.37313e+08	2.27831e+08	2.68965e+08	3.09744e+08	2.85601e+08	2.06769e+08	2.64085e+08	2.86771e+08	2.91735e+08	2.9183e+08
289pos		Cer(d17:1_18:0)+H	Cer(d35:1)+H	Cer	(d17:1_18:0)	(d17:1)	(18:0)			C35 H70 O3 N1	552.535	676.955	0.0510547	1.08563	0.685255	0.17276	3.69888e+07	1.96211e+07	3.1792e+07	3.91486e+07	3.34828e+07	1.31645e+07	2.39456e+07	4.44236e+07	3.57223e+07	3.66248e+07	4.41571e+07	2.74988e+07	2.16931e+07	4.04975e+07	2.29518e+07	2.63267e+07	3.79455e+07	3.71704e+07	4.73991e+07	2.32693e+07	3.33979e+07	3.23638e+07	2.39672e+07	3.93397e+07	2.08797e+07	2.2814e+07	2.28683e+07
2900pos		PC(8:1e_11:2)+H	PC(19:3e)+H	PC	(8:1e_11:2)	(8:1e)	(11:2)			C27 H51 O7 N1 P1	532.34	125.339	0.0461946	0.987953	0.964939	0.0887062	1.21475e+07	3.74161e+06	1.71304e+07	8.13806e+06	9.89597e+06	1.14045e+07	6.99368e+06	1.1733e+07	1.05756e+07	1.53443e+07	7.15873e+06	2.37548e+06	5.00574e+06	4.12555e+06	4.27419e+06	7.76498e+06	1.47524e+07	1.13714e+07	9.30861e+06	5.96114e+06	8.04695e+06	5.29517e+06	9.99096e+06	1.23428e+07	7.94175e+06	8.61411e+06	8.61186e+06
290pos		Cer(d35:1)+H-H2O	Cer(d35:1)+H-H2O	Cer	(d17:1_18:0)	(d17:1)	(18:0)			C35 H68 O2 N1	534.524	676.955	0.0426929	1.09642	0.554394	0.129275	3.32853e+07	2.29981e+07	2.53167e+07	3.57238e+07	2.8443e+07	1.92196e+07	2.26889e+07	4.20091e+07	2.8474e+07	2.7067e+07	4.20501e+07	2.32603e+07	2.48697e+07	3.53575e+07	2.28161e+07	2.63692e+07	3.16349e+07	3.098e+07	4.35396e+07	2.24578e+07	2.79412e+07	2.5716e+07	2.88748e+07	3.79136e+07	2.20412e+07	2.37383e+07	2.37723e+07
2910pos		PC(8:1e_12:2)+H	PC(20:3e)+H	PC	(8:1e_12:2)	(8:1e)	(12:2)			C28 H53 O7 N1 P1	546.355	192	0.0191606	0.922919	0.76911	0.264435	5.70707e+07	2.91273e+07	8.92908e+07	3.85311e+07	3.67689e+07	5.48696e+07	1.66437e+07	3.69218e+07	6.47724e+07	4.85053e+07	4.29053e+07	1.21988e+07	2.7776e+07	1.85212e+07	2.00944e+07	2.55724e+07	3.72735e+07	6.46726e+07	3.67226e+07	4.81676e+07	1.40375e+07	3.27608e+07	2.52051e+07	7.95015e+07	3.83642e+07	3.83675e+07	3.96533e+07
2918pos		PC(21:0)+H	PC(21:0)+H	PC	(21:0)	(21:0)				C29 H59 O8 N1 P1	580.397	197.578	0.0101696	0.766637	0.589098	0.119071	2.2419e+06	948146	4.65287e+06	3.50008e+06	3.841e+06	2.67485e+06	7.34686e+06	1.34972e+06	1.49935e+06	6.61564e+06	7.85484e+06	1.90131e+06	306447	7.03296e+06	6.6656e+06	7.41079e+06	5.30322e+06	1.64302e+06	2.8762e+06	2.03123e+06	7.42848e+06	2.45985e+06	1.26906e+06	1.7209e+06	1.679e+06	1.64975e+06	1.64979e+06
2922pos		PC(12:0e_10:1)+H	PC(22:1e)+H	PC	(12:0e_10:1)	(12:0e)	(10:1)			C30 H61 O7 N1 P1	578.418	222.323	0.00972508	1.21556	0.45828	0.0182677	1.62337e+06	869503	3.07978e+06	2.28219e+06	2.53445e+06	3.02827e+06	1.22684e+06	3.78812e+06	2.76697e+06	3.03627e+06	1.57018e+06	725637	1.18988e+06	1.6255e+06	1.10025e+06	3.57465e+06	2.46981e+06	2.94247e+06	1.75125e+06	2.57949e+06	2.01307e+06	2.13811e+06	2.44867e+06	4.77218e+06	1.94636e+06	1.98267e+06	1.95441e+06
2927pos		PC(23:0e)+H	PC(23:0e)+H	PC	(23:0e)	(23:0e)				C31 H65 O7 N1 P1	594.449	406.978	0.0272643	1.17101	0.62298	0.0384098	1.77295e+06	498195	1.78799e+06	2.16099e+06	1.5477e+06	1.7762e+06	2.52988e+06	1.54071e+06	1.86071e+06	1.97747e+06	1.62538e+06	678105	641146	1.66778e+06	1.66039e+06	1.2898e+06	2.30318e+06	1.36783e+06	1.18411e+06	1.72445e+06	3.13304e+06	1.36531e+06	924008	1.81943e+06	1.3288e+06	1.39357e+06	1.3936e+06
2928pos		PC(8:0e_16:1)+H	PC(24:1e)+H	PC	(8:0e_16:1)	(8:0e)	(16:1)			C32 H65 O7 N1 P1	606.449	350.047	0.0095257	1.10223	0.766212	0.0621301	2.17084e+06	1.37041e+06	2.03684e+06	3.28604e+06	2.79765e+06	3.65779e+06	2.84737e+06	2.81278e+06	2.58428e+06	4.37005e+06	1.11703e+06	754606	1.16079e+06	2.8982e+06	1.36143e+06	2.45239e+06	2.61194e+06	2.95205e+06	2.88106e+06	2.63927e+06	6.08321e+06	2.29755e+06	2.14366e+06	2.99985e+06	2.12837e+06	2.12967e+06	2.16432e+06
2929pos		PC(14:1_10:2)+H	PC(24:3)+H	PC	(14:1_10:2)	(14:1)	(10:2)			C32 H59 O8 N1 P1	616.397	216.946	0.0415042	0.639812	0.455201	0.134461	2.89974e+06	1.64705e+06	2.75331e+06	2.15855e+06	2.38755e+06	2.33868e+06	4.64832e+06	585720	440192	8.79344e+06	2.66318e+06	1.93243e+06	178853	4.72313e+06	2.72299e+06	5.36651e+06	1.86707e+06	553227	2.769e+06	2.25643e+06	6.6964e+06	3.80882e+06	888868	3.37226e+06	1.71443e+06	1.71459e+06	1.84079e+06
2931pos		PC(25:3)+H	PC(25:3)+H	PC	(25:3)	(25:3)				C33 H61 O8 N1 P1	630.413	130.101	0.00976334	0.6681	0.469099	0.185865	1.10473e+07	4.223e+06	1.34966e+07	6.60438e+06	3.99281e+06	4.06112e+06	1.40652e+07	953725	659965	1.25324e+07	1.6271e+07	2.94006e+06	301150	1.29943e+07	5.05693e+06	1.0947e+07	1.37823e+07	1.3676e+06	5.57948e+06	3.69138e+06	1.27371e+07	5.88161e+06	1.02583e+06	6.17167e+06	3.51493e+06	3.57541e+06	3.51633e+06
2932pos		PC(18:0_10:0)+H	PC(28:0)+H	PC	(18:0_10:0)	(18:0)	(10:0)			C36 H73 O8 N1 P1	678.507	475.921	0.0084205	1.43941	0.133625	0.121384	8.58532e+06	3.26902e+06	6.47098e+06	1.11091e+07	6.30954e+06	1.05343e+07	1.06186e+07	1.02114e+07	9.26976e+06	7.15244e+06	8.75288e+06	2.42745e+06	4.57147e+06	9.12754e+06	4.68055e+06	9.4999e+06	7.89672e+06	1.02805e+07	7.27099e+06	1.05704e+07	1.22513e+07	9.25242e+06	6.63886e+06	1.36137e+07	5.56849e+06	5.64848e+06	5.65238e+06
293pos		Cer(d36:0)+H	Cer(d36:0)+H	Cer	(d36:0)	(d36:0)				C36 H74 O3 N1	568.566	660.238	0.146948	1.23573	0.494887	0.086214	1.46641e+07	4.95734e+06	2.8788e+07	2.41993e+07	2.761e+07	9.90326e+06	3.66752e+07	1.92687e+07	1.6922e+07	9.10039e+06	3.97745e+07	1.09126e+07	4.01481e+06	1.96148e+07	2.28365e+07	1.93927e+07	2.77037e+07	2.15665e+07	1.19871e+07	1.89516e+07	1.889e+07	1.21943e+07	1.60912e+07	2.25605e+07	1.0649e+07	1.38785e+07	1.39469e+07
2947pos		PC(30:0e)+H	PC(30:0e)+H	PC	(30:0e)	(30:0e)				C38 H79 O7 N1 P1	692.559	598.863	0.0423347	1.04007	0.788646	0.340565	5.23708e+07	5.86448e+07	5.81924e+07	1.24015e+08	1.4278e+08	8.65223e+07	4.66006e+07	1.10726e+08	1.32046e+08	1.24868e+08	5.04325e+07	8.63033e+07	7.30869e+07	1.39592e+08	4.52148e+07	1.52248e+08	6.11389e+07	1.14321e+08	8.35944e+07	1.35524e+08	9.19554e+07	1.05274e+08	1.10701e+08	1.54763e+08	7.46814e+07	8.11837e+07	7.9055e+07
295neg		Cer(d18:2_22:0)-H	Cer(d40:2)-H	Cer	(d18:2_22:0)	(d18:2)	(22:0)			C40 H76 O3 N1	618.583	778.664	0.0137017	0.819391	0.16829	0.584197	2.21427e+07	2.52453e+07	1.74603e+07	1.88023e+07	2.10959e+07	2.083e+07	9.77468e+06	7.54783e+06	2.38897e+07	2.14296e+07	4.23041e+06	2.3756e+07	2.53111e+07	2.11241e+07	1.63326e+07	1.91224e+07	1.93966e+07	2.47914e+07	2.59218e+07	1.846e+07	1.66252e+07	1.93526e+07	1.96761e+07	2.80871e+07	1.5663e+07	1.56709e+07	1.60417e+07
295pos		Cer(d18:0_18:0)+H	Cer(d36:0)+H	Cer	(d18:0_18:0)	(d18:0)	(18:0)			C36 H74 O3 N1	568.566	728.311	0.0661996	1.4318	0.0699731	0.248724	2.40024e+07	2.71221e+07	3.11875e+07	5.07429e+07	2.96845e+07	2.79782e+07	2.69324e+07	3.31296e+07	3.12286e+07	2.37921e+07	2.36547e+07	2.58611e+07	2.76406e+07	2.33223e+07	2.63487e+07	2.63347e+07	2.50524e+07	4.37025e+07	4.04375e+07	2.567e+07	6.7688e+07	4.21229e+07	3.61032e+07	4.43248e+07	2.24535e+07	2.52586e+07	2.52234e+07
2966pos		PC(30:1e)+H	PC(30:1e)+H	PC	(30:1e)	(30:1e)				C38 H77 O7 N1 P1	690.543	549.84	0.0284868	0.702856	0.233654	0.263919	5.33835e+06	7.18676e+06	3.31025e+06	7.49007e+06	1.65732e+07	2.30646e+07	704968	9.07121e+06	1.62372e+07	9.45778e+06	2.87576e+06	6.86625e+06	6.9974e+06	1.53395e+07	1.68572e+06	1.30738e+07	6.20662e+06	1.01676e+07	9.71237e+06	1.37244e+07	3.62902e+06	1.04211e+07	1.09244e+07	2.1499e+07	7.76307e+06	7.75311e+06	7.38159e+06
2969pos		PC(8:0_22:2)+H	PC(30:2)+H	PC	(8:0_22:2)	(8:0)	(22:2)			C38 H73 O8 N1 P1	702.507	449.82	0.0125621	0.868127	0.661951	0.065923	5.46802e+06	997352	6.4073e+06	1.64978e+06	1.45102e+06	3.24451e+06	1.34371e+06	1.82955e+06	3.4183e+06	1.07856e+06	2.3941e+06	759590	688302	1.94481e+06	1.22649e+06	3.02355e+06	2.00753e+06	1.50397e+06	1.86595e+06	2.0334e+06	705741	2.3478e+06	1.08239e+06	5.15288e+06	1.70511e+06	1.7417e+06	1.70362e+06
2973pos		PC(31:0)+H	PC(31:0)+H	PC	(31:0)	(31:0)				C39 H79 O8 N1 P1	720.554	591.418	0.0263861	1.15027	0.568837	0.0919799	3.54169e+08	1.22484e+08	3.741e+08	2.45602e+08	2.18992e+08	1.36931e+08	4.49806e+08	2.38076e+08	2.01534e+08	3.9939e+08	3.68407e+08	1.3522e+08	1.71429e+08	2.03498e+08	3.50252e+08	2.0082e+08	3.39795e+08	1.87564e+08	1.90401e+08	2.19967e+08	3.64076e+08	2.02112e+08	2.21003e+08	2.09265e+08	1.99182e+08	2.08587e+08	2.08556e+08
2977pos		PC(19:0_12:0)+H	PC(31:0)+H	PC	(19:0_12:0)	(19:0)	(12:0)			C39 H79 O8 N1 P1	720.554	720.342	0.0454195	0.9657	0.678398	0.415147	1.02117e+08	4.86257e+07	6.25459e+07	6.28791e+07	5.80601e+07	4.36696e+07	6.45202e+07	6.32049e+07	4.43389e+07	4.54137e+07	1.24566e+08	4.79893e+07	4.29951e+07	4.1168e+07	7.52349e+07	4.55015e+07	9.72454e+07	4.39389e+07	5.72396e+07	4.94642e+07	4.50293e+07	5.10941e+07	4.44115e+07	6.27528e+07	4.02458e+07	4.35914e+07	4.35828e+07
2985pos		PC(31:0e)+H	PC(31:0e)+H	PC	(31:0e)	(31:0e)				C39 H81 O7 N1 P1	706.575	635.58	0.0538853	0.675475	0.0942283	0.548856	1.05074e+07	1.76958e+07	8.7347e+06	1.85678e+07	4.51766e+07	2.91419e+07	6.11738e+06	3.02627e+07	2.2026e+07	4.94808e+07	5.8317e+06	2.61104e+07	1.52926e+07	2.29891e+07	4.79192e+06	2.77743e+07	9.65986e+06	3.14395e+07	3.20856e+07	2.65911e+07	1.34603e+07	1.81495e+07	2.62817e+07	2.57785e+07	1.86209e+07	1.87367e+07	2.04752e+07
2986pos		PC(31:0e)+H	PC(31:0e)+H	PC	(31:0e)	(31:0e)				C39 H81 O7 N1 P1	706.575	831.78	0.0311166	1.21487	0.171427	0.0291611	2.53266e+06	2.12598e+06	2.25356e+06	2.07089e+06	2.47717e+06	1.42665e+06	6.6382e+06	2.88099e+06	3.43814e+06	2.49297e+06	1.66056e+06	2.28573e+06	2.31292e+06	2.74219e+06	2.08221e+06	2.67075e+06	2.3392e+06	3.07938e+06	3.44055e+06	2.21837e+06	2.17839e+06	3.35142e+06	3.50764e+06	3.95864e+06	2.13641e+06	2.25657e+06	2.2551e+06
2988pos		PC(9:0_22:1)+H	PC(31:1)+H	PC	(9:0_22:1)	(9:0)	(22:1)			C39 H77 O8 N1 P1	718.538	528.638	0.0136037	0.933817	0.738849	0.12188	9.84509e+06	4.19905e+06	1.48323e+07	1.35293e+07	1.11223e+07	7.14095e+06	1.58793e+07	7.36535e+06	8.24886e+06	1.15794e+07	1.40918e+07	4.19601e+06	5.36513e+06	1.17155e+07	8.303e+06	1.00551e+07	1.63238e+07	4.86908e+06	8.39174e+06	1.17677e+07	9.12098e+06	8.25286e+06	8.57e+06	9.60232e+06	8.67049e+06	8.47313e+06	8.46578e+06
2990pos		PC(31:1)+H	PC(31:1)+H	PC	(31:1)	(31:1)				C39 H77 O8 N1 P1	718.538	654.807	0.0286215	1.49793	0.252272	0.627612	2.90159e+08	8.39966e+07	3.08488e+08	2.90738e+08	1.87497e+08	9.13232e+07	5.81297e+08	1.89958e+08	2.04101e+08	2.61451e+08	3.37468e+08	1.24066e+08	1.30912e+08	2.02645e+08	4.66713e+08	1.87535e+08	3.20999e+08	1.87171e+08	1.72097e+08	2.33123e+08	5.07856e+08	1.99744e+08	1.63095e+08	2.17125e+08	1.85327e+08	1.95575e+08	1.87381e+08
2997pos		PC(20:0_11:2)+H	PC(31:2)+H	PC	(20:0_11:2)	(20:0)	(11:2)			C39 H75 O8 N1 P1	716.522	601.099	0.0383477	0.913708	0.649606	0.807018	4.44811e+08	1.31808e+08	5.19202e+08	2.47478e+08	4.74883e+08	2.80558e+08	4.09109e+08	2.55912e+08	2.70336e+08	5.04734e+08	3.88577e+08	2.43986e+08	3.04805e+08	2.67494e+08	4.39085e+08	2.80429e+08	4.61023e+08	2.95688e+08	2.82401e+08	2.91354e+08	3.10908e+08	2.95102e+08	2.90413e+08	3.15222e+08	2.69002e+08	2.90368e+08	2.81793e+08
2neg		CL(48:2)-2H	CL(48:2)-2H	CL	(48:2)	(48:2)				C57 H104 O17 P2	561.338	145.068	0.0160472	0.810944	0.645404	0.210143	2.8259e+06	1.29626e+07	9.19739e+06	1.42657e+06	4.52355e+06	7.41937e+06	665416	515326	431490	332235	6.08578e+06	2.24072e+06	6.119e+06	680450	2.60965e+06	3.94546e+06	7.9379e+06	4.49636e+06	7.1567e+06	9.35607e+06	854745	7.05101e+06	9.05072e+06	853699	3.66336e+06	3.76586e+06	3.66283e+06
3002pos		PC(11:0_20:3)+H	PC(31:3)+H	PC	(11:0_20:3)	(11:0)	(20:3)			C39 H73 O8 N1 P1	714.507	532.32	0.0310797	1.27531	0.286912	0.0485137	1.81472e+07	4.23459e+06	1.60132e+07	1.53345e+07	6.84788e+06	9.74199e+06	3.09406e+07	8.25074e+06	7.42623e+06	9.65962e+06	1.7043e+07	3.07355e+06	6.12587e+06	8.16689e+06	1.45637e+07	7.35661e+06	2.08374e+07	6.00986e+06	4.34827e+06	1.19005e+07	1.25867e+07	8.41039e+06	6.95839e+06	6.68943e+06	9.39927e+06	8.903e+06	9.40094e+06
3003pos		PC(17:1_14:4)+H	PC(31:5)+H	PC	(17:1_14:4)	(17:1)	(14:4)			C39 H69 O8 N1 P1	710.476	205.944	0.100364	0.295427	0.0104919	0.213214	5.60263e+06	1.51126e+06	3.99001e+06	2.03385e+06	1.47319e+06	3.02054e+06	2.62807e+06	389927	100176	4.54805e+06	4.96869e+06	2.12485e+06	15256.9	2.59357e+06	1.28767e+06	2.89197e+06	3.07888e+06	428664	2.25182e+06	1.08784e+06	1.68531e+06	1.62557e+06	265903	2.39239e+06	1.41711e+06	1.19717e+06	1.19554e+06
300pos		Cer(d18:1_18:0)+H	Cer(d36:1)+H	Cer	(d18:1_18:0)	(d18:1)	(18:0)			C36 H72 O3 N1	566.551	716.714	0.0752381	1.16506	0.218221	0.304165	5.46136e+08	5.12741e+08	5.24693e+08	1.33043e+09	6.24106e+08	5.20873e+08	4.89311e+08	5.93393e+08	5.49503e+08	4.99231e+08	8.03981e+08	4.82869e+08	5.03957e+08	4.67711e+08	4.85755e+08	5.27841e+08	6.58248e+08	7.96866e+08	7.43991e+08	5.50442e+08	7.60216e+08	7.87613e+08	5.00282e+08	9.46715e+08	4.54401e+08	5.18955e+08	5.19541e+08
3010pos		PC(32:0)+H	PC(32:0)+H	PC	(32:0)	(32:0)				C40 H81 O8 N1 P1	734.569	563.402	0.020769	1.46512	0.369698	0.322049	9.30914e+07	3.94304e+07	8.7925e+07	9.88979e+07	6.20567e+07	3.15512e+07	2.00223e+08	7.66681e+07	6.54936e+07	8.63217e+07	1.31062e+08	2.93128e+07	4.88606e+07	7.74926e+07	1.15953e+08	6.9451e+07	1.04957e+08	2.51387e+07	4.7053e+07	1.19123e+08	1.80471e+08	5.89304e+07	4.32061e+07	7.00692e+07	6.70952e+07	6.95381e+07	6.70952e+07
3015pos		PC(32:0)+H	PC(32:0)+H	PC	(16:0_16:0)	(16:0)	(16:0)			C40 H81 O8 N1 P1	734.569	620.822	0.0264846	1.13913	0.490684	1.22451	9.38146e+09	5.12825e+09	9.50721e+09	8.28608e+09	7.90365e+09	5.58098e+09	1.59703e+10	7.4894e+09	8.0677e+09	1.1055e+10	1.17549e+10	6.37786e+09	5.97284e+09	7.43167e+09	1.31797e+10	8.14514e+09	8.54318e+09	7.69407e+09	7.56833e+09	7.799e+09	1.3676e+10	7.33177e+09	7.51792e+09	7.55749e+09	7.12426e+09	7.46134e+09	7.46142e+09
3019pos		PC(32:0)+H	PC(32:0)+H	PC	(32:0)	(32:0)				C40 H81 O8 N1 P1	734.569	666.6	0.0518334	0.374667	0.11847	1.41641	1.24105e+08	1.81416e+08	1.18928e+08	6.5827e+07	1.19721e+08	5.10855e+08	2.00543e+08	5.72506e+07	1.50674e+08	1.48151e+08	1.27927e+08	6.12012e+07	4.74544e+07	6.71576e+07	2.58191e+08	1.13406e+08	1.62707e+08	7.96425e+07	8.89389e+07	1.47298e+08	8.27594e+07	8.85182e+07	6.03618e+07	1.16924e+08	9.74843e+07	1.06668e+08	1.06914e+08
301pos		Cer(d36:1)+H-H2O	Cer(d36:1)+H-H2O	Cer	(d18:1_18:0)	(d18:1)	(18:0)			C36 H70 O2 N1	548.54	716.714	0.0726588	1.13869	0.27715	0.429993	5.17243e+08	5.14042e+08	4.98687e+08	1.22125e+09	5.68163e+08	4.96357e+08	4.59713e+08	5.39262e+08	4.77807e+08	4.31052e+08	7.49863e+08	4.58145e+08	4.72673e+08	4.45597e+08	4.45173e+08	4.81079e+08	5.8649e+08	7.19166e+08	6.70087e+08	4.9478e+08	6.9604e+08	7.10181e+08	4.35702e+08	8.43751e+08	4.21904e+08	4.79924e+08	4.79801e+08
3024pos		PC(19:0_13:0)+H	PC(32:0)+H	PC	(19:0_13:0)	(19:0)	(13:0)			C40 H81 O8 N1 P1	734.569	747.948	0.137196	0.976384	0.915434	0.196812	1.75546e+07	2.85273e+07	1.29197e+07	1.77908e+07	1.50486e+07	2.58982e+07	2.32555e+07	2.89465e+07	1.02838e+07	1.39362e+07	1.7154e+07	2.62128e+07	2.21494e+07	5.48835e+06	3.06824e+07	8.78233e+06	1.36137e+07	1.37644e+07	1.06858e+07	1.55294e+07	2.45979e+07	1.93707e+07	8.63888e+06	1.14166e+07	2.18231e+07	1.70252e+07	2.18418e+07
3053pos		PC(32:0e)+Na	PC(32:0e)+Na	PC	(32:0e)	(32:0e)				C40 H82 O7 N1 P1 Na1	742.572	609.18	0.0307519	1.09797	0.49857	0.562549	1.08874e+09	5.99349e+08	1.34597e+09	6.82658e+08	7.95268e+08	5.78655e+08	4.87734e+08	9.46266e+08	8.92777e+08	6.69104e+08	1.09648e+09	6.64252e+08	6.96016e+08	7.37484e+08	6.48644e+08	7.93175e+08	1.28493e+09	8.2003e+08	1.10851e+09	7.27651e+08	5.66133e+08	8.39228e+08	9.80013e+08	1.0032e+09	6.53023e+08	6.89259e+08	6.8891e+08
3054pos		PC(32:0e)+H	PC(32:0e)+H	PC	(32:0e)	(32:0e)				C40 H83 O7 N1 P1	720.59	671.581	0.0414255	1.13707	0.254205	0.721997	1.47518e+09	1.35122e+09	1.23148e+09	1.81192e+09	2.22075e+09	1.34563e+09	1.07883e+09	2.25735e+09	1.87412e+09	1.81418e+09	1.52805e+09	1.40591e+09	1.46133e+09	2.11727e+09	1.23854e+09	2.66018e+09	1.43742e+09	1.99803e+09	1.5502e+09	2.08828e+09	1.60318e+09	1.7817e+09	1.91421e+09	2.82807e+09	1.31057e+09	1.41921e+09	1.39453e+09
3059pos		PC(32:0e)+H	PC(32:0e)+H	PC	(32:0e)	(32:0e)				C40 H83 O7 N1 P1	720.59	880.383	0.0436062	0.456428	0.359802	0.117723	929783	747212	456125	970927	625304	1.00859e+06	427734	1.15544e+06	1.05374e+06	972429	525960	7.54713e+06	815346	754071	402747	636118	828088	1.04423e+06	952584	884476	585299	927938	881914	1.43031e+06	862698	865194	800332
3065pos		PC(32:1)+Na	PC(32:1)+Na	PC	(32:1)	(32:1)				C40 H78 O8 N1 P1 Na1	754.536	493.38	0.00376293	1.22833	0.292366	0.20644	3.90132e+07	4.16834e+07	4.00915e+07	6.285e+07	5.99325e+07	7.70441e+07	3.59548e+07	1.05542e+08	6.71183e+07	6.00155e+07	5.45253e+07	2.96714e+07	4.13009e+07	5.08084e+07	2.64554e+07	6.54612e+07	4.63598e+07	5.90879e+07	7.93552e+07	6.90043e+07	8.22204e+07	7.15767e+07	6.73651e+07	7.94206e+07	4.88147e+07	4.91335e+07	4.9135e+07
3069pos		PC(32:1)+H	PC(32:1)+H	PC	(32:1)	(32:1)				C40 H79 O8 N1 P1	732.554	686.17	0.0825623	0.950966	0.801788	0.131454	2.43785e+07	8.60465e+06	1.57129e+07	1.09447e+07	7.40338e+06	9.41844e+06	1.79075e+07	7.27486e+06	7.89054e+06	1.73089e+07	1.82513e+07	7.58905e+06	8.99681e+06	6.85698e+06	2.49234e+07	7.42224e+06	2.14881e+07	7.81118e+06	7.52458e+06	9.66038e+06	1.36602e+07	7.90401e+06	9.36532e+06	5.03029e+06	7.79234e+06	9.1686e+06	8.30691e+06
306neg		Cer(d18:1_23:0)-H	Cer(d41:1)-H	Cer	(d18:1_23:0)	(d18:1)	(23:0)			C41 H80 O3 N1	634.614	869.327	0.0335301	0.827297	0.145111	0.373032	1.58941e+07	1.49859e+07	1.35924e+07	1.31488e+07	1.14658e+07	1.32214e+07	6.19703e+06	4.92135e+06	1.34681e+07	1.43383e+07	3.57789e+06	1.4521e+07	1.37594e+07	1.43249e+07	1.06949e+07	1.43267e+07	1.42951e+07	1.21453e+07	1.56471e+07	1.36809e+07	1.18271e+07	1.46425e+07	1.23457e+07	1.71504e+07	7.43254e+06	7.44963e+06	7.88151e+06
307neg		Cer(d41:1)+HCOO	Cer(d41:1)+HCOO	Cer	(d18:1_23:0)	(d18:1)	(23:0)			C42 H82 O5 N1	680.62	869.327	0.0107201	0.789831	0.061894	3.39718	6.73932e+08	6.52575e+08	6.03149e+08	5.89304e+08	5.15517e+08	6.13975e+08	2.6779e+08	2.2064e+08	6.29452e+08	6.15635e+08	1.57353e+08	6.6859e+08	6.2222e+08	6.67305e+08	4.67841e+08	6.54778e+08	6.12994e+08	5.26296e+08	6.89732e+08	6.31087e+08	4.99915e+08	5.60438e+08	5.37116e+08	7.7414e+08	3.38355e+08	3.38791e+08	3.44887e+08
3080pos		PC(8:1e_24:0)+H	PC(32:1e)+H	PC	(8:1e_24:0)	(8:1e)	(24:0)			C40 H81 O7 N1 P1	718.575	665.179	0.0539718	1.1851	0.407801	0.305873	3.3763e+08	2.17905e+08	4.32049e+08	5.77784e+08	2.95983e+08	1.71734e+08	5.202e+08	2.62012e+08	2.74843e+08	2.94091e+08	7.18095e+08	2.48221e+08	2.38388e+08	5.1166e+08	3.0734e+08	2.81281e+08	5.73613e+08	3.11781e+08	3.20838e+08	2.67687e+08	5.48903e+08	2.58141e+08	2.16224e+08	2.72419e+08	2.25112e+08	2.4831e+08	2.46709e+08
308neg		Cer(d41:1+O)+HCOO	Cer(d41:1+O)+HCOO	Cer	(d41:1+O)	(d41:1+O)				C42 H82 O6 N1	696.615	772.229	0.0144151	1.02205	0.877123	0.143572	3.08531e+06	3.71464e+06	3.40805e+06	4.88778e+06	3.78408e+06	4.87264e+06	3.73905e+06	1.99901e+06	4.98348e+06	4.29337e+06	817380	3.903e+06	6.18948e+06	4.87326e+06	3.16068e+06	4.03398e+06	3.4537e+06	4.52295e+06	4.72585e+06	5.6824e+06	4.62561e+06	4.41477e+06	4.0996e+06	4.9221e+06	2.08625e+06	2.08961e+06	2.14042e+06
3090pos		PC(16:1_16:1)+H	PC(32:2)+H	PC	(16:1_16:1)	(16:1)	(16:1)			C40 H77 O8 N1 P1	730.538	504.89	0.0487092	0.771063	0.194765	1.06465	1.85013e+08	1.21043e+08	1.21278e+08	1.63643e+08	2.27578e+08	2.72083e+08	1.68346e+08	1.70922e+08	1.58265e+08	1.96282e+08	1.40626e+08	1.05141e+08	1.07746e+08	1.27289e+08	9.35395e+07	1.698e+08	1.69578e+08	1.11834e+08	1.4405e+08	1.65534e+08	1.56766e+08	1.63168e+08	1.11655e+08	1.91595e+08	1.39802e+08	1.52022e+08	1.39958e+08
3091pos		PC(32:2)+Na	PC(32:2)+Na	PC	(16:1_16:1)	(16:1)	(16:1)			C40 H76 O8 N1 P1 Na1	752.52	504.89	0.00687238	0.831465	0.48335	0.203715	3.15747e+06	5.19398e+06	5.84265e+06	9.82044e+06	1.4584e+07	1.18665e+07	1.40982e+07	7.69473e+06	8.57782e+06	1.50014e+07	6.47769e+06	4.25657e+06	5.14092e+06	8.12513e+06	6.52143e+06	7.05429e+06	4.74644e+06	7.37027e+06	9.52708e+06	9.31124e+06	1.4324e+07	1.00343e+07	5.68083e+06	1.02783e+07	9.0176e+06	9.0175e+06	8.91064e+06
3092pos		PC(12:0_20:2)+H	PC(32:2)+H	PC	(12:0_20:2)	(12:0)	(20:2)			C40 H77 O8 N1 P1	730.538	530.752	0.0711884	0.967169	0.889601	0.233655	1.73945e+07	7.74412e+06	2.49817e+07	1.337e+07	1.52246e+07	1.5862e+07	9.54871e+06	1.51524e+07	1.24526e+07	1.65472e+07	2.06208e+07	7.46874e+06	6.36248e+06	9.13429e+06	8.91594e+06	2.2453e+07	9.46362e+06	1.86029e+07	2.31532e+07	1.4026e+07	2.05418e+07	1.37829e+07	8.73373e+06	3.61395e+07	8.90564e+06	1.01025e+07	1.01017e+07
309neg		Cer(d18:2_23:0)-H	Cer(d41:2)-H	Cer	(d18:2_23:0)	(d18:2)	(23:0)			C41 H78 O3 N1	632.599	817.799	0.0164227	0.864874	0.24955	0.19431	7.82612e+06	7.2893e+06	9.28171e+06	8.39757e+06	8.0406e+06	7.16492e+06	3.75733e+06	2.69259e+06	7.92388e+06	6.8423e+06	1.81879e+06	6.76194e+06	8.25645e+06	9.17227e+06	5.48265e+06	9.75155e+06	7.50321e+06	7.15187e+06	7.51735e+06	6.9977e+06	6.35464e+06	7.11822e+06	6.14892e+06	8.91056e+06	4.31204e+06	4.30716e+06	4.43329e+06
30pos		AcCa(18:0)+H	AcCa(18:0)+H	AcCa	(18:0)	(18:0)				C25 H50 O4 N1	428.373	140.804	0.0131466	1.87199	0.0574454	0.943276	9.91236e+07	3.95094e+07	1.23962e+08	1.63297e+08	1.18281e+08	1.66742e+08	2.16466e+08	2.06336e+08	1.71776e+08	8.24505e+07	1.67528e+08	3.89438e+07	6.20446e+07	1.50649e+08	7.57306e+07	1.48671e+08	1.83122e+08	2.35496e+08	1.51228e+08	1.90898e+08	2.61158e+08	2.4675e+08	1.06081e+08	2.13772e+08	1.25606e+08	1.28496e+08	1.2562e+08
3114pos		PC(10:0_22:3)+H	PC(32:3)+H	PC	(10:0_22:3)	(10:0)	(22:3)			C40 H75 O8 N1 P1	728.522	485.995	0.0265878	0.808047	0.482302	0.140656	3.79966e+06	2.39049e+06	2.93658e+06	3.84508e+06	3.81885e+06	5.90252e+06	1.60861e+06	3.55866e+06	5.52608e+06	2.38616e+06	3.01584e+06	1.91255e+06	1.71314e+06	3.29425e+06	1.84509e+06	4.5728e+06	2.76069e+06	3.89696e+06	8.31139e+06	3.79655e+06	3.29472e+06	4.0586e+06	3.45443e+06	5.64487e+06	3.18716e+06	3.18882e+06	3.33709e+06
3122pos		PC(33:0)+H	PC(33:0)+H	PC	(33:0)	(33:0)				C41 H83 O8 N1 P1	748.585	646.68	0.231456	1.08834	0.822377	0.222679	3.04543e+08	9.02542e+07	2.80171e+08	1.42414e+08	1.29266e+08	1.14776e+08	4.56762e+08	2.5643e+08	1.21996e+08	4.589e+08	2.88366e+08	1.22828e+08	1.46951e+08	2.18307e+08	4.17205e+08	1.3068e+08	2.40215e+08	1.2655e+08	1.52696e+08	1.3174e+08	3.56293e+08	1.41327e+08	1.35581e+08	1.22679e+08	1.36802e+08	1.44778e+08	2.05513e+08
3124pos		PC(33:0)+H	PC(33:0)+H	PC	(33:0)	(33:0)				C41 H83 O8 N1 P1	748.585	781.8	0.0408513	1.16286	0.225315	0.0353638	2.52348e+07	1.20569e+07	1.26951e+07	2.25138e+07	9.68466e+06	1.13303e+07	1.32075e+07	1.64734e+07	1.71565e+07	1.2593e+07	2.08023e+07	1.10905e+07	1.07968e+07	9.94821e+06	1.05895e+07	1.09494e+07	2.29459e+07	1.49848e+07	1.80297e+07	1.2221e+07	1.28027e+07	1.78264e+07	1.40805e+07	2.33034e+07	9.7411e+06	1.01201e+07	1.05689e+07
3132pos		PC(33:0e)+H	PC(33:0e)+H	PC	(33:0e)	(33:0e)				C41 H85 O7 N1 P1	734.606	706.011	0.0762533	1.2778	0.195627	0.168266	1.95437e+07	2.64763e+07	2.27424e+07	2.19465e+07	3.83204e+07	3.53016e+07	1.49382e+07	6.27263e+07	3.69804e+07	3.88249e+07	2.46794e+07	2.48542e+07	3.67582e+07	2.37797e+07	1.98008e+07	2.68359e+07	2.85082e+07	5.7346e+07	5.05927e+07	4.35206e+07	2.36466e+07	3.96012e+07	5.38442e+07	5.65045e+07	2.17882e+07	2.52162e+07	2.27214e+07
3145pos		PC(33:1)+H	PC(33:1)+H	PC	(33:1)	(33:1)				C41 H81 O8 N1 P1	746.569	598.123	0.0633985	1.04496	0.843312	0.316999	4.76914e+08	1.40599e+08	5.05887e+08	2.71337e+08	3.28364e+08	1.56578e+08	4.52812e+08	3.17991e+08	2.09138e+08	4.8945e+08	3.52806e+08	2.10379e+08	2.40751e+08	2.05559e+08	3.59388e+08	2.33813e+08	4.53271e+08	2.19481e+08	2.35153e+08	2.92062e+08	3.52647e+08	2.2738e+08	2.7244e+08	1.75357e+08	2.34758e+08	2.63122e+08	2.37898e+08
3151pos		PC(9:0_24:1)+H	PC(33:1)+H	PC	(9:0_24:1)	(9:0)	(24:1)			C41 H81 O8 N1 P1	746.569	722.805	0.0448611	1.31884	0.0651078	0.360962	5.69311e+08	2.68238e+08	2.98175e+08	6.6702e+08	2.82053e+08	1.89103e+08	5.78456e+08	2.78618e+08	2.49622e+08	2.3994e+08	7.33682e+08	2.60294e+08	2.69861e+08	2.36494e+08	4.87029e+08	2.56769e+08	6.29671e+08	3.47741e+08	2.82744e+08	3.92086e+08	4.79291e+08	3.88132e+08	2.44121e+08	3.05342e+08	2.40242e+08	2.56845e+08	2.6195e+08
315neg		Cer(d42:1)+HCOO	Cer(d42:1)+HCOO	Cer	(d18:1_24:0)	(d18:1)	(24:0)			C43 H84 O5 N1	694.635	869.52	0.00715813	1.0079	0.97302	0.864037	1.18832e+08	1.11618e+08	7.84422e+07	9.39002e+07	6.73624e+07	9.25064e+07	1.5418e+08	3.29862e+07	1.19324e+08	1.47561e+08	1.91716e+07	9.74668e+07	9.6857e+07	1.01342e+08	1.96016e+08	8.81864e+07	6.10238e+07	1.07699e+08	1.12478e+08	1.14932e+08	1.95931e+08	1.00331e+08	1.00157e+08	7.84394e+07	6.28213e+07	6.20493e+07	6.20484e+07
3172pos		PC(14:0e_19:1)+H	PC(33:1e)+H	PC	(14:0e_19:1)	(14:0e)	(19:1)			C41 H83 O7 N1 P1	732.59	775.138	0.0467328	1.73969	0.000929244	0.673322	3.85404e+07	3.2742e+07	2.70233e+07	5.30917e+07	3.38029e+07	2.75782e+07	1.79447e+07	7.13723e+07	6.22727e+07	6.40118e+07	4.25544e+07	3.17985e+07	7.26039e+07	3.06717e+07	2.66649e+07	3.89354e+07	4.24647e+07	7.14983e+07	4.59109e+07	9.75277e+07	6.98449e+07	7.11826e+07	5.37933e+07	8.71504e+07	3.29841e+07	3.61535e+07	3.4095e+07
3176pos		PC(33:2)+H	PC(33:2)+H	PC	(33:2)	(33:2)				C41 H79 O8 N1 P1	744.554	543.48	0.0114744	0.65265	0.213572	0.902584	1.12848e+08	5.00606e+07	1.22924e+08	7.55022e+07	1.62494e+08	2.04911e+08	8.87513e+07	1.17766e+08	8.74231e+07	2.24069e+08	9.06962e+07	4.79563e+07	5.61513e+07	6.54466e+07	7.89706e+07	7.64562e+07	9.96948e+07	7.76933e+07	7.73004e+07	9.99417e+07	9.08346e+07	8.47263e+07	7.32746e+07	1.20357e+08	8.72219e+07	8.54999e+07	8.7222e+07
3179pos		PC(22:1_11:1)+H	PC(33:2)+H	PC	(22:1_11:1)	(22:1)	(11:1)			C41 H79 O8 N1 P1	744.554	674.119	0.0343232	1.06433	0.634917	0.945342	1.48587e+09	5.50555e+08	1.65227e+09	8.09422e+08	1.24835e+09	7.56855e+08	8.08839e+08	9.1309e+08	9.15066e+08	1.14221e+09	1.08749e+09	8.22962e+08	9.67041e+08	9.6173e+08	9.81948e+08	9.09103e+08	1.50573e+09	8.53338e+08	8.24275e+08	1.00486e+09	8.79039e+08	1.18917e+09	8.87401e+08	1.04918e+09	8.01892e+08	8.58729e+08	8.35131e+08
317neg		Cer(d18:1_24:0)-H	Cer(d42:1)-H	Cer	(d18:1_24:0)	(d18:1)	(24:0)			C42 H82 O3 N1	648.63	896.252	0.00971864	0.907674	0.551261	0.231932	1.7869e+07	1.94421e+07	1.32901e+07	1.74352e+07	1.35669e+07	1.64804e+07	1.4764e+07	5.75467e+06	1.70985e+07	1.79304e+07	4.3951e+06	1.6787e+07	1.58961e+07	1.96405e+07	1.87651e+07	1.5358e+07	1.58136e+07	1.65786e+07	1.72874e+07	1.82767e+07	2.40459e+07	1.62684e+07	1.358e+07	1.07819e+07	9.7547e+06	9.92317e+06	9.91825e+06
3190pos		PC(12:1e_21:1)+H	PC(33:2e)+H	PC	(12:1e_21:1)	(12:1e)	(21:1)			C41 H81 O7 N1 P1	730.575	718.34	0.0394676	1.47954	0.0242973	0.928573	8.48513e+07	1.22945e+08	4.92693e+07	1.26044e+08	1.86974e+08	1.32912e+08	4.32553e+07	2.99395e+08	2.1953e+08	1.7856e+08	7.26993e+07	1.21667e+08	2.45355e+08	1.1759e+08	5.04107e+07	1.24491e+08	7.91063e+07	2.10318e+08	1.48733e+08	2.20439e+08	1.17013e+08	2.20307e+08	2.27055e+08	3.17621e+08	1.06437e+08	1.08494e+08	1.14764e+08
319pos		Cer(d18:2_18:0)+H	Cer(d36:2)+H	Cer	(d18:2_18:0)	(d18:2)	(18:0)			C36 H70 O3 N1	564.535	651.718	0.0392627	1.36126	0.182185	0.228113	3.69304e+07	2.98924e+07	3.78832e+07	7.30813e+07	3.47942e+07	2.21153e+07	5.12384e+07	4.42404e+07	4.84541e+07	3.67518e+07	5.25496e+07	3.83711e+07	3.52845e+07	6.77123e+07	3.4616e+07	3.66027e+07	4.43867e+07	6.75603e+07	6.606e+07	3.71773e+07	8.03871e+07	4.48001e+07	3.80743e+07	4.23963e+07	3.56301e+07	3.82852e+07	3.59981e+07
320pos		Cer(d36:2)+H-H2O	Cer(d36:2)+H-H2O	Cer	(d18:2_18:0)	(d18:2)	(18:0)			C36 H68 O2 N1	546.524	651.718	0.0305456	1.29224	0.242559	0.133361	3.66286e+07	3.98605e+07	3.42308e+07	7.05738e+07	3.54337e+07	2.10926e+07	6.18812e+07	3.99784e+07	4.39772e+07	3.35906e+07	4.70351e+07	3.62522e+07	4.73783e+07	6.2701e+07	3.00632e+07	3.45476e+07	4.24286e+07	6.24254e+07	6.36528e+07	2.91188e+07	7.73493e+07	3.5891e+07	3.40397e+07	3.54331e+07	3.46292e+07	3.61573e+07	3.67517e+07
3216pos		PC(22:3_11:2)+H	PC(33:5)+H	PC	(22:3_11:2)	(22:3)	(11:2)			C41 H73 O8 N1 P1	738.507	540.66	0.0401995	1.05532	0.793294	0.0887448	1.97536e+07	7.06638e+06	1.80449e+07	1.23242e+07	1.44579e+07	1.97413e+07	2.75673e+07	1.67369e+07	1.21979e+07	1.34358e+07	1.78856e+07	4.91816e+06	8.92305e+06	7.43478e+06	1.99236e+07	1.42351e+07	1.38827e+07	1.40495e+07	1.18758e+07	1.21478e+07	1.31689e+07	1.19779e+07	1.05942e+07	1.41751e+07	1.33093e+07	1.32951e+07	1.23971e+07
321neg		Cer(d18:2_24:0)-H	Cer(d42:2)-H	Cer	(d18:2_24:0)	(d18:2)	(24:0)			C42 H80 O3 N1	646.614	835.14	0.00650666	1.03219	0.854481	0.392834	2.21056e+07	2.47247e+07	2.30211e+07	3.6273e+07	2.01612e+07	2.15426e+07	2.63744e+07	6.99791e+06	2.08525e+07	1.83965e+07	8.04556e+06	2.14277e+07	2.20308e+07	2.83822e+07	2.50151e+07	1.96549e+07	2.50787e+07	2.7632e+07	2.34022e+07	2.46595e+07	3.32481e+07	2.28546e+07	2.10647e+07	2.47083e+07	1.715e+07	1.73449e+07	1.71518e+07
322neg		Cer(d18:2_24:0)-H	Cer(d42:2)-H	Cer	(d18:2_24:0)	(d18:2)	(24:0)			C42 H80 O3 N1	646.614	859.368	0.0157633	0.962836	0.80179	0.141268	9.27853e+06	9.54073e+06	6.98651e+06	1.19415e+07	6.64328e+06	8.13192e+06	8.28885e+06	3.07468e+06	7.50161e+06	7.92238e+06	2.77197e+06	9.10591e+06	8.38911e+06	8.9031e+06	7.91785e+06	7.42833e+06	9.93372e+06	8.81909e+06	9.56207e+06	1.01277e+07	1.15638e+07	8.80162e+06	8.36609e+06	1.00512e+07	4.56489e+06	4.563e+06	4.68969e+06
3235pos		PC(20:0_14:0)+H	PC(34:0)+H	PC	(20:0_14:0)	(20:0)	(14:0)			C42 H85 O8 N1 P1	762.601	697.323	0.0762197	1.06108	0.788624	1.55039	2.62355e+09	2.61155e+09	2.42814e+09	2.25583e+09	2.50467e+09	2.5381e+09	4.69429e+09	2.64792e+09	2.46644e+09	3.97343e+09	2.63795e+09	2.34076e+09	2.20387e+09	2.47257e+09	4.61879e+09	2.1563e+09	2.23191e+09	2.14383e+09	2.18227e+09	2.43202e+09	5.50192e+09	2.48066e+09	2.1591e+09	2.13835e+09	2.00723e+09	2.32741e+09	2.25168e+09
324neg		Cer(d18:2_24:1)-H	Cer(d42:3)-H	Cer	(d18:2_24:1)	(d18:2)	(24:1)			C42 H78 O3 N1	644.599	778.561	0.0069847	0.992589	0.970699	0.265821	1.11591e+07	9.69694e+06	8.68454e+06	1.35386e+07	8.2754e+06	8.89453e+06	1.23528e+07	2.46787e+06	8.16234e+06	6.93825e+06	3.00573e+06	7.68943e+06	7.32182e+06	1.37488e+07	1.03845e+07	6.1771e+06	1.33044e+07	9.18707e+06	9.64422e+06	9.81376e+06	1.48058e+07	8.91117e+06	8.06608e+06	9.37666e+06	7.1189e+06	7.21852e+06	7.17794e+06
3256pos		PC(34:0e)+Na	PC(34:0e)+Na	PC	(34:0e)	(34:0e)				C42 H86 O7 N1 P1 Na1	770.603	679.56	0.0482317	1.13348	0.541469	0.107532	1.80607e+08	1.84925e+08	1.59253e+08	1.58834e+08	2.09412e+08	1.47323e+08	6.09262e+07	2.85328e+08	2.0999e+08	1.88324e+08	1.81755e+08	1.70444e+08	1.85385e+08	1.91985e+08	1.7705e+08	2.0626e+08	1.85933e+08	2.61452e+08	4.08794e+08	1.6175e+08	1.62393e+08	2.74847e+08	3.14568e+08	3.36436e+08	1.41078e+08	1.54418e+08	1.52452e+08
326neg		Cer(d43:2)+HCOO	Cer(d43:2)+HCOO	Cer	(d43:2)	(d43:2)				C44 H84 O5 N1	706.635	880.242	0.0339426	0.9041	0.449442	0.126115	1.3783e+07	1.16015e+07	1.18483e+07	1.27147e+07	9.50276e+06	1.06893e+07	7.4186e+06	4.19016e+06	1.17903e+07	1.18636e+07	3.97893e+06	1.11367e+07	1.22633e+07	1.26051e+07	1.19431e+07	1.1692e+07	1.59706e+07	1.20443e+07	1.33254e+07	1.43036e+07	1.13348e+07	1.21643e+07	9.58979e+06	1.28462e+07	4.80812e+06	5.10158e+06	5.10306e+06
3272pos		PC(34:1)+H	PC(34:1)+H	PC	(34:1)	(34:1)				C42 H83 O8 N1 P1	760.585	142.5	0.0694375	1.42208	0.168001	0.0708617	1.64517e+06	2.16415e+06	3.53337e+06	2.02776e+06	2.12303e+06	4.8526e+06	2.8084e+06	2.45437e+06	4.02467e+06	2.08142e+06	2.5498e+06	1.40858e+06	2.45031e+06	4.05486e+06	1.96228e+06	2.0026e+06	6.03345e+06	3.16716e+06	3.69704e+06	5.61029e+06	4.35936e+06	5.06088e+06	5.72592e+06	8.27345e+06	3.0885e+06	2.74499e+06	2.74426e+06
327neg		Cer(d44:3)+HCOO	Cer(d44:3)+HCOO	Cer	(d44:3)	(d44:3)				C45 H84 O5 N1	718.635	847.154	0.0414063	0.980606	0.948074	0.227773	3.98119e+06	2.85098e+06	2.36693e+06	6.4343e+06	2.61177e+06	2.27877e+06	9.39598e+06	1.14187e+06	2.92681e+06	4.11813e+06	1.9487e+06	2.73144e+06	1.78083e+06	4.88246e+06	5.99978e+06	2.30772e+06	4.52931e+06	3.15821e+06	3.53586e+06	3.77808e+06	6.82704e+06	2.95914e+06	1.90831e+06	3.27386e+06	2.08975e+06	2.09052e+06	1.94373e+06
3286pos		PC(11:0_23:1)+H	PC(34:1)+H	PC	(11:0_23:1)	(11:0)	(23:1)			C42 H83 O8 N1 P1	760.585	530.94	0.0287697	1.18257	0.54421	0.0031572	5.00186e+06	4.09576e+06	4.88885e+06	5.61109e+06	5.20318e+06	5.8151e+06	2.66458e+06	1.13645e+07	9.35241e+06	9.1824e+06	4.93989e+06	2.67241e+06	4.32095e+06	5.63528e+06	2.7744e+06	5.47574e+06	6.36257e+06	6.45701e+06	4.33877e+06	8.66824e+06	2.99696e+06	7.32662e+06	4.55728e+06	9.2833e+06	5.13047e+06	4.88655e+06	4.87967e+06
3293pos		PC(11:0_23:1)+H	PC(34:1)+H	PC	(11:0_23:1)	(11:0)	(23:1)			C42 H83 O8 N1 P1	760.585	620.64	0.0231318	1.01613	0.866191	5.19325	1.79361e+10	9.8716e+09	1.83662e+10	1.4103e+10	1.54459e+10	1.17469e+10	1.88245e+10	1.43331e+10	1.33491e+10	1.75519e+10	1.74219e+10	1.1888e+10	1.21287e+10	1.36131e+10	1.48377e+10	1.35086e+10	1.96245e+10	1.33541e+10	1.30129e+10	1.56588e+10	1.53219e+10	1.30907e+10	1.25711e+10	1.44951e+10	1.24885e+10	1.30232e+10	1.29791e+10
3297pos		PC(11:0_23:1)+Na	PC(34:1)+Na	PC	(11:0_23:1)	(11:0)	(23:1)			C42 H82 O8 N1 P1 Na1	782.567	687.19	0.147977	1.31093	0.105227	0.338776	2.24747e+08	8.01658e+07	1.06987e+08	1.01822e+08	1.22439e+08	7.5369e+07	5.0025e+07	1.11559e+08	1.01557e+08	1.20259e+08	1.47098e+08	7.62586e+07	1.18247e+08	1.66005e+08	1.19631e+08	1.90772e+08	1.76729e+08	1.95914e+08	1.20999e+08	1.11315e+08	1.38718e+08	1.18887e+08	9.73244e+07	1.06315e+08	1.19966e+08	1.53837e+08	1.2036e+08
32pos		AcCa(18:0)+H	AcCa(18:0)+H	AcCa	(18:0)	(18:0)				C25 H50 O4 N1	428.373	201.814	0.546642	3.31186	0.13124	0.207503	1.65655e+06	1.5162e+06	2.48377e+06	7.78992e+06	2.32151e+06	3.35089e+06	3.65615e+06	1.92198e+07	4.45242e+06	1.50132e+06	3.45206e+06	1.12507e+06	1.83866e+06	895642	772897	2.07025e+06	2.05202e+06	2.20994e+06	1.92396e+06	3.55645e+06	3.18342e+06	3.88085e+06	8.54505e+06	4.62059e+06	1.11658e+07	3.29996e+06	1.21454e+07
333neg		Cer(m35:1+O)+HCOO	Cer(m35:1+O)+HCOO	Cer	(m35:1+O)	(m35:1+O)				C36 H70 O5 N1	596.526	668.88	0.0125827	0.863361	0.268448	0.648313	5.99365e+07	8.0323e+07	6.41916e+07	7.7924e+07	6.55288e+07	6.46569e+07	5.29631e+07	3.09624e+07	7.33175e+07	6.37817e+07	1.82171e+07	8.099e+07	7.71253e+07	8.26788e+07	4.30944e+07	5.68075e+07	6.44832e+07	7.58802e+07	9.64216e+07	5.45412e+07	6.99264e+07	6.82462e+07	6.78412e+07	8.25277e+07	4.08412e+07	4.17415e+07	4.08485e+07
3348pos		PC(24:0_10:1)+H	PC(34:1)+H	PC	(24:0_10:1)	(24:0)	(10:1)			C42 H83 O8 N1 P1	760.585	1330.65	0.142859	1.19966	0.795696	0.167483	1.74648e+06	1.66951e+07	3.22031e+08	2.26376e+08	3.65647e+08	2.49674e+06	1.55802e+07	6.34744e+08	8.56488e+07	7.81791e+08	5.97972e+08	698341	649404	3.22971e+08	2.36884e+07	1.98863e+07	1.48856e+08	7.29385e+07	1.25381e+08	3.49733e+08	8.84621e+07	4.16591e+08	3.37427e+08	2.6486e+08	5.51738e+07	7.1737e+07	7.12981e+07
336neg		Cer(m36:0+O)+HCOO	Cer(m36:0+O)+HCOO	Cer	(m36:0+O)	(m36:0+O)				C37 H74 O5 N1	612.557	735.244	0.0105084	1.19922	0.397922	1.3106	4.8985e+07	7.15689e+07	7.18696e+07	8.00076e+07	5.56623e+07	6.21185e+07	5.02674e+07	2.21772e+07	6.14063e+07	5.41469e+07	1.68187e+07	7.18899e+07	7.58679e+07	7.41279e+07	6.45265e+07	4.43388e+07	5.29725e+07	8.18892e+07	8.74158e+07	5.75145e+07	1.31608e+08	8.79586e+07	8.35464e+07	6.87106e+07	4.07897e+07	4.0046e+07	4.07778e+07
3374pos		PC(34:2)+Na	PC(34:2)+Na	PC	(34:2)	(34:2)				C42 H80 O8 N1 P1 Na1	780.551	529.02	0.00354081	0.721032	0.181475	1.98049	3.83193e+08	2.97533e+08	4.28663e+08	4.6821e+08	7.61897e+08	1.00642e+09	2.74389e+08	5.94507e+08	6.56584e+08	6.18049e+08	4.84271e+08	3.97147e+08	3.26463e+08	4.05779e+08	2.02221e+08	5.03542e+08	4.00864e+08	5.16208e+08	4.82158e+08	5.42924e+08	3.08966e+08	3.93648e+08	4.29393e+08	6.76947e+08	4.14444e+08	4.11903e+08	4.14435e+08
3375pos		PC(22:0_12:2)+H	PC(34:2)+H	PC	(22:0_12:2)	(22:0)	(12:2)			C42 H81 O8 N1 P1	758.569	583.442	0.0172938	0.968011	0.854182	5.49116	1.46571e+10	8.50619e+09	1.83143e+10	1.47596e+10	2.18345e+10	1.39993e+10	1.93163e+10	1.49736e+10	1.48286e+10	2.34766e+10	1.61494e+10	1.12297e+10	1.13713e+10	1.59105e+10	1.4362e+10	1.50528e+10	1.55266e+10	1.44424e+10	1.52317e+10	1.49182e+10	2.01198e+10	1.57525e+10	1.46025e+10	1.51075e+10	1.46035e+10	1.46967e+10	1.50859e+10
3376pos		PC(34:2)+Na	PC(34:2)+Na	PC	(22:0_12:2)	(22:0)	(12:2)			C42 H80 O8 N1 P1 Na1	780.551	583.442	0.0141594	1.00049	0.997664	0.344717	8.12756e+07	5.8321e+07	8.61881e+07	8.2488e+07	9.0007e+07	8.91762e+07	1.77364e+08	6.60369e+07	7.54249e+07	1.00893e+08	7.05559e+07	8.9009e+07	7.57656e+07	8.64095e+07	1.12616e+08	8.38796e+07	8.55476e+07	7.78349e+07	6.91671e+07	7.60058e+07	1.41986e+08	6.88197e+07	6.63764e+07	6.88957e+07	8.82954e+07	9.0472e+07	8.82824e+07
3377pos		PC(16:0_18:2)+H	PC(34:2)+H	PC	(16:0_18:2)	(16:0)	(18:2)			C42 H81 O8 N1 P1	758.569	610.088	0.477912	0.967721	0.955104	0.286205	7.18868e+07	1.28183e+08	2.52449e+08	1.09605e+09	1.75618e+08	2.81995e+08	1.21322e+09	1.03346e+09	5.1911e+08	1.29168e+09	7.46352e+07	1.24271e+08	9.71802e+08	1.06366e+08	6.15311e+08	8.5158e+07	1.20779e+09	3.58139e+08	8.46667e+08	1.15371e+09	2.20413e+08	6.4533e+07	1.08132e+08	1.17638e+09	1.94111e+08	5.20014e+08	3.18349e+08
338neg		Cer(m19:1_17:0+O)+HCOO	Cer(m36:1+O)+HCOO	Cer	(m19:1_17:0+O)	(m19:1)	(17:0+O)			C37 H72 O5 N1	610.542	709.104	0.0028948	0.984675	0.926947	1.42058	9.72907e+08	1.20803e+09	8.76451e+08	1.40717e+09	1.00084e+09	9.18477e+08	1.24202e+09	3.30355e+08	1.15678e+09	8.57472e+08	3.51562e+08	1.1458e+09	1.20011e+09	1.31084e+09	9.32093e+08	9.56495e+08	9.70382e+08	1.28091e+09	1.38617e+09	8.50013e+08	1.39491e+09	9.88117e+08	1.22252e+09	1.03948e+09	8.99448e+08	8.94927e+08	8.9941e+08
3410pos		PC(34:2)+H	PC(34:2)+H	PC	(34:2)	(34:2)				C42 H81 O8 N1 P1	758.569	1297.17	0.335204	2.35976	0.229271	0.463381	229966	63338.5	4.19522e+07	2.58081e+07	4.8036e+06	4.69827e+06	3.81336e+07	1.11526e+08	1.48927e+07	6.25462e+07	6.20762e+06	205194	60759.7	2.86503e+07	884125	108752	2.27874e+07	1.48803e+07	3.57613e+07	1.63452e+06	5.81957e+07	3.67947e+07	3.35801e+07	4.12448e+07	2.05731e+07	2.10172e+07	3.57597e+07
3415pos		PC(34:2e)+H	PC(34:2e)+H	PC	(34:2e)	(34:2e)				C42 H83 O7 N1 P1	744.59	217.74	0.00724942	1.44902	0.223241	0.0582914	1.44205e+06	1.16809e+06	2.96388e+06	3.13159e+06	3.17851e+06	3.74369e+06	1.40063e+06	3.57733e+06	4.62203e+06	1.72829e+06	1.744e+06	1.15041e+06	858089	3.28988e+06	1.54137e+06	2.30137e+06	2.73431e+06	3.06046e+06	2.19296e+06	7.94493e+06	4.1405e+06	2.22322e+06	5.21233e+06	8.31423e+06	4.06851e+06	4.06805e+06	4.01742e+06
3428pos		PC(34:2e)+H	PC(34:2e)+H	PC	(34:2e)	(34:2e)				C42 H83 O7 N1 P1	744.59	842.76	0.093266	1.41086	0.134067	0.349549	1.37999e+08	7.20007e+07	6.90905e+07	1.64784e+08	6.67725e+07	6.8893e+07	7.43832e+07	1.5054e+08	1.22873e+08	7.39336e+07	8.29483e+07	6.89947e+07	6.55599e+07	6.89948e+07	7.63e+07	6.6609e+07	9.67883e+07	1.58439e+08	1.3891e+08	7.01532e+07	7.3139e+07	1.46715e+08	9.62317e+07	1.73741e+08	6.02999e+07	7.11842e+07	7.12485e+07
342pos		Cer(d18:1_19:0)+H	Cer(d37:1)+H	Cer	(d18:1_19:0)	(d18:1)	(19:0)			C37 H74 O3 N1	580.566	749.7	0.0782188	1.16691	0.469611	0.195338	2.71999e+08	1.11907e+08	1.05982e+08	1.74236e+08	1.10225e+08	1.18774e+08	1.08345e+08	2.58005e+08	1.78595e+08	1.26419e+08	1.14231e+08	1.01993e+08	1.09752e+08	1.12844e+08	1.05686e+08	1.12255e+08	2.22036e+08	1.77357e+08	2.06761e+08	1.2548e+08	1.04405e+08	1.19341e+08	1.36756e+08	2.87409e+08	9.43243e+07	1.07036e+08	1.09383e+08
344pos		Cer(d18:0_20:0)+H	Cer(d38:0)+H	Cer	(d18:0_20:0)	(d18:0)	(20:0)			C38 H78 O3 N1	596.598	740.303	0.0849445	1.26935	0.256249	0.0575999	1.43623e+07	1.47152e+07	1.39804e+07	2.52518e+07	2.08023e+07	1.62097e+07	2.31484e+07	2.18295e+07	1.30604e+07	1.04157e+07	2.32306e+07	1.06822e+07	1.46041e+07	1.29652e+07	1.36148e+07	1.29605e+07	2.52802e+07	3.20806e+07	1.78923e+07	2.10091e+07	1.42924e+07	1.27357e+07	1.96102e+07	2.89985e+07	1.27072e+07	1.50141e+07	1.43824e+07
3459pos		PC(22:0_12:3)+Na	PC(34:3)+Na	PC	(22:0_12:3)	(22:0)	(12:3)			C42 H78 O8 N1 P1 Na1	778.536	471.48	0.0138482	1.03796	0.872797	0.497467	9.17681e+07	1.57276e+08	1.00827e+08	1.42403e+08	1.70312e+08	2.29357e+08	3.20553e+07	3.12704e+08	2.33817e+08	1.24675e+08	1.01608e+08	9.75599e+07	1.1882e+08	1.64346e+08	2.95596e+07	2.20339e+08	1.32523e+08	1.95275e+08	2.98707e+08	1.93165e+08	1.2457e+08	1.71751e+08	1.95689e+08	2.9459e+08	1.33138e+08	1.3636e+08	1.33144e+08
345neg		Cer(m18:1_19:0+O)+HCOO	Cer(m37:1+O)+HCOO	Cer	(m18:1_19:0+O)	(m18:1)	(19:0+O)			C38 H74 O5 N1	624.557	753.834	0.00631449	0.870308	0.288512	1.59503	4.66678e+08	4.15511e+08	4.43832e+08	3.94742e+08	3.92075e+08	3.71101e+08	1.98774e+08	1.70308e+08	4.33114e+08	4.05807e+08	1.01491e+08	4.11755e+08	4.75314e+08	4.37438e+08	3.32856e+08	3.88074e+08	4.69023e+08	4.12393e+08	5.09976e+08	3.63842e+08	3.14608e+08	3.86802e+08	4.21763e+08	5.35606e+08	3.06799e+08	3.06846e+08	3.10191e+08
3463pos		PC(16:1_18:2)+H	PC(34:3)+H	PC	(16:1_18:2)	(16:1)	(18:2)			C42 H79 O8 N1 P1	756.554	531.168	0.0112787	0.910635	0.623105	0.837386	1.85636e+08	1.14951e+08	2.13891e+08	1.85722e+08	2.47236e+08	3.08598e+08	1.50068e+08	2.19528e+08	1.93084e+08	2.579e+08	1.86224e+08	1.11886e+08	1.2131e+08	1.74844e+08	1.749e+08	1.92429e+08	1.89923e+08	1.84565e+08	2.2619e+08	1.96111e+08	2.34489e+08	2.24721e+08	1.68945e+08	2.33059e+08	1.70918e+08	1.72583e+08	1.68743e+08
3469pos		PC(34:3)+H	PC(34:3)+H	PC	(34:3)	(34:3)				C42 H79 O8 N1 P1	756.554	634.2	0.011502	1.04761	0.824026	0.26953	6.56795e+07	3.88684e+07	6.15743e+07	6.48838e+07	5.73405e+07	4.68464e+07	1.53614e+08	5.6901e+07	5.31392e+07	7.75645e+07	6.68678e+07	4.5779e+07	3.39681e+07	6.27841e+07	1.06428e+08	5.77433e+07	5.27082e+07	4.4534e+07	4.87987e+07	5.38804e+07	9.95731e+07	5.08861e+07	4.43418e+07	5.098e+07	6.49938e+07	6.63009e+07	6.63111e+07
347pos		Cer(d18:0_20:0)+H	Cer(d38:0)+H	Cer	(d18:0_20:0)	(d18:0)	(20:0)			C38 H78 O3 N1	596.598	806.447	0.0702933	1.30633	0.155478	0.127719	2.87703e+07	1.72117e+07	1.82259e+07	2.9758e+07	1.65475e+07	1.79902e+07	1.83159e+07	2.01402e+07	1.82729e+07	2.14621e+07	2.11485e+07	1.61022e+07	1.63061e+07	1.19582e+07	1.46625e+07	1.62571e+07	2.88316e+07	2.68589e+07	2.89757e+07	1.34283e+07	4.05887e+07	2.53427e+07	2.52884e+07	3.62679e+07	1.22284e+07	1.39233e+07	1.3761e+07
3488pos		PC(34:3e)+H	PC(34:3e)+H	PC	(34:3e)	(34:3e)				C42 H81 O7 N1 P1	742.575	678.695	0.0375515	1.18245	0.472319	0.044783	1.40758e+07	1.5287e+07	1.63076e+07	1.83455e+07	1.77966e+07	1.50144e+07	4.61881e+07	1.55437e+07	1.56209e+07	1.39979e+07	1.46852e+07	1.70195e+07	1.31717e+07	2.10205e+07	2.25546e+07	1.7998e+07	1.81267e+07	1.32845e+07	1.48821e+06	1.42446e+07	2.65717e+07	1.41201e+07	1.26182e+07	1.69592e+07	1.49276e+07	1.60632e+07	1.57387e+07
349neg		Cer(m19:0_19:0+O)+HCOO	Cer(m38:0+O)+HCOO	Cer	(m19:0_19:0+O)	(m19:0)	(19:0+O)			C39 H78 O5 N1	640.589	792.906	0.0070918	1.0869	0.653977	0.814567	6.44759e+07	6.15687e+07	8.40382e+07	6.04388e+07	5.59228e+07	6.95376e+07	3.51477e+07	1.73627e+07	6.22438e+07	4.96535e+07	1.81887e+07	6.42283e+07	7.58646e+07	6.62119e+07	5.49077e+07	5.3338e+07	6.5987e+07	7.40789e+07	6.99717e+07	5.49642e+07	1.00823e+08	6.59633e+07	6.90217e+07	8.35976e+07	3.76059e+07	3.80708e+07	3.80724e+07
3501pos		PC(22:3_12:1)+H	PC(34:4)+H	PC	(22:3_12:1)	(22:3)	(12:1)			C42 H77 O8 N1 P1	754.538	464.08	0.0186311	0.442831	0.0148961	0.692962	2.49372e+07	2.2412e+07	2.56856e+07	1.53253e+07	4.41681e+07	5.64908e+07	8.75722e+06	1.98071e+07	2.19615e+07	3.34051e+07	2.57473e+07	1.52554e+07	1.21494e+07	1.39693e+07	1.15099e+07	2.19513e+07	1.68602e+07	1.41436e+07	3.51979e+07	2.66613e+07	6.8708e+06	2.45764e+07	1.40875e+07	3.34343e+07	1.83335e+07	1.83303e+07	1.77466e+07
350neg		Cer(m38:0+O)+HCOO	Cer(m38:0+O)+HCOO	Cer	(m38:0+O)	(m38:0+O)				C39 H78 O5 N1	640.589	818.88	0.00951795	0.933942	0.639971	0.0710692	1.41265e+07	1.48594e+07	1.41635e+07	1.41042e+07	1.55592e+07	1.84435e+07	5.45484e+06	4.82249e+06	1.50613e+07	1.55499e+07	3.63177e+06	1.49549e+07	1.69681e+07	1.36174e+07	1.04154e+07	1.55302e+07	1.53858e+07	1.84915e+07	1.7087e+07	1.61764e+07	1.45414e+07	1.85895e+07	1.66694e+07	1.81897e+07	8.30494e+06	8.16736e+06	8.30201e+06
3511pos		PC(16:0e_18:4)+H	PC(34:4e)+H	PC	(16:0e_18:4)	(16:0e)	(18:4)			C42 H79 O7 N1 P1	740.559	529.99	0.0192801	0.952211	0.811965	0.24217	1.31448e+07	1.88159e+07	1.11683e+07	2.65752e+07	3.20019e+07	4.3177e+07	5.38984e+06	3.57766e+07	4.18916e+07	2.40241e+07	1.18251e+07	1.34585e+07	1.69006e+07	2.49197e+07	6.49177e+06	2.9121e+07	1.32555e+07	3.00826e+07	3.03642e+07	2.9799e+07	1.70941e+07	2.81111e+07	2.61424e+07	3.7912e+07	2.10401e+07	2.17517e+07	2.10422e+07
3515pos		PC(14:0e_20:5)+H	PC(34:5e)+H	PC	(14:0e_20:5)	(14:0e)	(20:5)			C42 H77 O7 N1 P1	738.543	522.75	0.00814357	0.479752	0.105338	0.36597	4.15111e+07	5.51288e+06	5.08206e+07	8.98856e+06	7.21188e+06	1.1245e+07	3.27037e+06	6.40566e+06	1.15578e+07	3.12079e+07	5.46788e+06	1.66083e+07	4.55648e+06	8.7742e+06	1.68533e+06	6.41151e+06	5.71288e+06	8.64249e+06	8.9403e+06	6.27711e+06	5.12758e+06	6.51703e+06	7.47933e+06	9.60505e+06	5.8656e+06	5.82092e+06	5.91642e+06
3520pos		PC(12:1e_22:6)+H	PC(34:7e)+H	PC	(12:1e_22:6)	(12:1e)	(22:6)			C42 H73 O7 N1 P1	734.512	558.638	0.0682847	0.835069	0.338248	0.371475	3.50817e+07	1.86292e+07	4.01546e+07	2.61976e+07	3.50179e+07	1.82183e+07	1.69371e+07	2.54445e+07	2.45001e+07	2.9723e+07	3.23833e+07	1.43893e+07	1.41296e+07	2.47911e+07	1.93702e+07	2.39355e+07	3.88053e+07	2.32953e+07	3.24861e+07	2.46385e+07	1.56018e+07	2.05581e+07	2.49482e+07	2.65228e+07	2.43279e+07	2.43089e+07	2.15513e+07
3523pos		PC(14:0_21:0)+H	PC(35:0)+H	PC	(14:0_21:0)	(14:0)	(21:0)			C43 H87 O8 N1 P1	776.616	734.082	0.174605	1.02319	0.835436	0.269171	1.48498e+08	5.04192e+07	5.22588e+07	4.92114e+07	4.86854e+07	4.83777e+07	6.9749e+07	6.16446e+07	5.40695e+07	5.95508e+07	1.09819e+08	6.10597e+07	7.54173e+07	4.71006e+07	1.17232e+08	5.65035e+07	1.04892e+08	4.93379e+07	5.21729e+07	5.5403e+07	5.58837e+07	4.82562e+07	3.71539e+07	9.74093e+07	4.26978e+07	5.91475e+07	4.64054e+07
3525pos		PC(35:0e)+H	PC(35:0e)+H	PC	(35:0e)	(35:0e)				C43 H89 O7 N1 P1	762.637	714.176	0.297305	1.31086	0.833095	0.324582	5.10328e+06	4.99453e+06	4.22312e+06	148505	7.42296e+06	4.45946e+06	2.72432e+08	7.65707e+06	8.01216e+06	2.60012e+08	6.95296e+06	5.61771e+06	5.75886e+06	3.39541e+06	2.37102e+08	5.60242e+06	8.30115e+06	1.09128e+07	9.19565e+06	2.36948e+08	3.4181e+08	6.97426e+06	9.26906e+06	1.11839e+07	2.8577e+07	1.75804e+07	1.76643e+07
3527pos		PC(35:0e)+H	PC(35:0e)+H	PC	(35:0e)	(35:0e)				C43 H89 O7 N1 P1	762.637	768.559	0.206878	1.71407	0.0304762	0.396998	1.86229e+07	1.35467e+07	7.81276e+06	1.84053e+07	1.21596e+07	1.27648e+07	1.86398e+07	3.87575e+07	1.74014e+07	2.76564e+07	1.10799e+07	1.39053e+07	2.5785e+07	1.1025e+07	1.16634e+07	1.34159e+07	1.9789e+07	4.16379e+07	2.71131e+07	2.38154e+07	1.46594e+07	2.76706e+07	3.51448e+07	4.3515e+07	1.16888e+07	1.30068e+07	1.72227e+07
3528pos		PC(35:0e)+H	PC(35:0e)+H	PC	(35:0e)	(35:0e)				C43 H89 O7 N1 P1	762.637	843.48	0.0605439	1.63627	0.00461897	0.133692	3.54437e+06	2.25703e+06	454763	2.15856e+06	1.85048e+06	2.08737e+06	2.43949e+06	2.96926e+06	2.48659e+06	3.35943e+06	491014	1.6804e+06	4.33819e+06	1.39228e+06	2.84754e+06	2.18163e+06	430732	4.42445e+06	2.40532e+06	3.00564e+06	4.31605e+06	3.6465e+06	2.62427e+06	4.6221e+06	1.66767e+06	1.85513e+06	1.85625e+06
3531pos		PC(29:1_6:0)+H	PC(35:1)+H	PC	(29:1_6:0)	(29:1)	(6:0)			C43 H85 O8 N1 P1	774.601	664.672	0.0813315	0.994863	0.962882	0.941498	8.29274e+08	3.39115e+08	8.76638e+08	4.44405e+08	3.82476e+08	4.34265e+08	6.95435e+08	4.40436e+08	4.00915e+08	6.77242e+08	8.13884e+08	4.91631e+08	5.20735e+08	4.30584e+08	6.36142e+08	4.4858e+08	1.0087e+09	4.82838e+08	4.65758e+08	4.43182e+08	4.55141e+08	4.25394e+08	4.51611e+08	3.91915e+08	4.27397e+08	4.99235e+08	4.46398e+08
3539pos		PC(16:1e_19:0)+H	PC(35:1e)+H	PC	(16:1e_19:0)	(16:1e)	(19:0)			C43 H87 O7 N1 P1	760.621	819.966	0.0993599	1.74079	0.0026546	0.453515	1.52521e+07	1.64307e+07	1.12734e+07	2.27113e+07	1.5785e+07	1.60786e+07	5.07226e+06	2.72288e+07	2.46521e+07	2.97513e+07	1.02359e+07	1.45879e+07	3.93242e+07	1.46978e+07	1.11622e+07	1.89369e+07	1.46932e+07	3.98124e+07	2.04793e+07	2.67365e+07	3.64392e+07	2.89222e+07	2.51787e+07	4.09877e+07	1.40961e+07	1.68887e+07	1.45113e+07
3560pos		PC(18:2e_17:0)+H	PC(35:2e)+H	PC	(18:2e_17:0)	(18:2e)	(17:0)			C43 H85 O7 N1 P1	758.606	813.185	0.0425444	1.52657	0.00218753	0.340395	1.97483e+07	1.835e+07	1.53996e+07	3.52862e+07	1.58561e+07	1.58074e+07	1.64599e+07	2.5305e+07	1.78724e+07	2.13828e+07	1.62967e+07	1.74704e+07	2.36552e+07	1.62218e+07	1.57318e+07	1.89653e+07	1.72429e+07	3.67614e+07	2.53897e+07	2.08057e+07	2.82437e+07	2.8618e+07	3.18368e+07	3.22872e+07	1.49308e+07	1.60943e+07	1.60813e+07
3565pos		PC(25:0_10:3)+H	PC(35:3)+H	PC	(25:0_10:3)	(25:0)	(10:3)			C43 H81 O8 N1 P1	770.569	551.667	0.00278341	0.534837	0.129568	0.909661	8.58966e+07	4.54634e+07	6.16373e+07	5.29024e+07	1.61047e+08	1.00289e+08	4.985e+07	8.36914e+07	6.59801e+07	1.68459e+08	6.57719e+07	3.63092e+07	4.40629e+07	4.49978e+07	7.00813e+07	5.75706e+07	7.31142e+07	6.51127e+07	4.93115e+07	7.21074e+07	2.25009e+07	6.17494e+07	2.28612e+07	7.76967e+07	7.34601e+07	7.38465e+07	7.35351e+07
3569pos		PC(21:1_14:2)+H	PC(35:3)+H	PC	(21:1_14:2)	(21:1)	(14:2)			C43 H81 O8 N1 P1	770.569	709.262	0.0488815	0.990976	0.961367	0.244525	3.25023e+07	3.14424e+07	2.22605e+07	2.97509e+07	5.75622e+07	2.4736e+07	2.51556e+07	3.46046e+07	4.77706e+07	2.4398e+07	4.62521e+07	2.41534e+07	2.26679e+07	4.15851e+07	2.93492e+07	3.91056e+07	3.0062e+07	4.14064e+07	3.93612e+07	4.08106e+07	2.70822e+07	3.89158e+07	3.51566e+07	3.30032e+07	2.17069e+07	2.39106e+07	2.25633e+07
3585pos		PC(23:1_12:3)+H	PC(35:4)+H	PC	(23:1_12:3)	(23:1)	(12:3)			C43 H79 O8 N1 P1	768.554	531.518	0.00475071	1.22954	0.294407	0.181986	1.44708e+08	7.51268e+07	1.51755e+08	1.05045e+08	1.32851e+08	1.53194e+08	5.16844e+07	2.21171e+08	1.32258e+08	1.55353e+08	1.13752e+08	6.37399e+07	1.11344e+08	9.09788e+07	6.13287e+07	1.50815e+08	1.40628e+08	1.47299e+08	1.31023e+08	1.48637e+08	8.80928e+07	1.49846e+08	1.56804e+08	1.77741e+08	1.0872e+08	1.09751e+08	1.09142e+08
3589pos		PC(24:2_11:2)+H	PC(35:4)+H	PC	(24:2_11:2)	(24:2)	(11:2)			C43 H79 O8 N1 P1	768.554	661.843	0.0517057	1.16163	0.0884888	1.63572	6.7102e+09	6.52867e+09	6.7853e+09	7.3765e+09	7.7063e+09	6.63052e+09	4.82278e+09	8.62397e+09	8.05376e+09	6.55619e+09	6.99687e+09	6.46279e+09	6.17848e+09	6.91497e+09	7.13969e+09	8.27091e+09	6.80383e+09	8.93281e+09	7.43942e+09	7.362e+09	6.42059e+09	9.24094e+09	8.60612e+09	9.25314e+09	6.0621e+09	6.7212e+09	6.36245e+09
360neg		Cer(m39:0+O)+HCOO	Cer(m39:0+O)+HCOO	Cer	(m39:0+O)	(m39:0+O)				C40 H80 O5 N1	654.604	836.46	0.00945467	0.832746	0.174792	0.307638	8.5237e+06	8.86545e+06	1.08375e+07	6.11427e+06	7.32801e+06	7.40105e+06	3.60432e+06	3.23615e+06	8.26917e+06	8.78462e+06	1.8182e+06	8.09607e+06	9.59274e+06	6.72415e+06	7.45935e+06	7.86415e+06	9.04082e+06	7.65585e+06	1.00549e+07	9.06553e+06	6.48202e+06	7.13645e+06	7.9755e+06	8.84406e+06	5.54672e+06	5.63885e+06	5.63827e+06
360pos		Cer(d18:1_20:0)+H	Cer(d38:1)+H	Cer	(d18:1_20:0)	(d18:1)	(20:0)			C38 H76 O3 N1	594.582	784.64	0.072033	1.38138	0.0589216	1.25295	1.60021e+09	7.42186e+08	7.00174e+08	1.57509e+09	7.57158e+08	7.20208e+08	8.02479e+08	1.23154e+09	1.22572e+09	8.0396e+08	7.29283e+08	6.93947e+08	8.24205e+08	7.17988e+08	7.07409e+08	7.19482e+08	1.37832e+09	1.65748e+09	1.22406e+09	7.56652e+08	8.65209e+08	1.10688e+09	1.1408e+09	2.04552e+09	6.74177e+08	7.52328e+08	7.74907e+08
3611pos		PC(35:4e)+H	PC(35:4e)+H	PC	(35:4e)	(35:4e)				C43 H81 O7 N1 P1	754.575	722.33	0.154342	1.50253	0.00767055	0.614789	4.46515e+07	4.22724e+07	4.02795e+07	7.68739e+07	7.35687e+07	5.41882e+07	4.59216e+07	9.43408e+07	6.20945e+07	5.23784e+07	5.48106e+07	4.20873e+07	7.04679e+07	4.83878e+07	6.10144e+07	4.67004e+07	3.84949e+07	9.07373e+07	6.8673e+07	7.89082e+07	5.7368e+07	9.17195e+07	9.596e+07	1.05765e+08	4.00635e+07	4.16261e+07	5.27477e+07
361neg		Cer(m39:1+O)+HCOO	Cer(m39:1+O)+HCOO	Cer	(m39:1+O)	(m39:1+O)				C40 H78 O5 N1	652.589	796.439	0.00785127	0.77204	0.124358	1.58232	1.26457e+08	8.91592e+07	1.22098e+08	6.27719e+07	7.25979e+07	7.50364e+07	3.0787e+07	3.4097e+07	1.00259e+08	9.52647e+07	2.71433e+07	7.83525e+07	1.01859e+08	8.21906e+07	7.82024e+07	8.28879e+07	1.19882e+08	8.01031e+07	9.18581e+07	9.1821e+07	3.56455e+07	6.94292e+07	6.66379e+07	1.23023e+08	5.92503e+07	5.92782e+07	6.00735e+07
3632pos		PC(35:6)+H	PC(35:6)+H	PC	(35:6)	(35:6)				C43 H75 O8 N1 P1	764.522	566.452	0.0100567	1.08332	0.380676	2.09112	5.42008e+09	3.12095e+09	6.32726e+09	4.57232e+09	4.64164e+09	3.51415e+09	2.4541e+09	4.43159e+09	5.53726e+09	4.43663e+09	5.45995e+09	3.066e+09	3.91109e+09	4.46632e+09	3.73548e+09	5.64234e+09	6.25361e+09	4.50089e+09	4.54374e+09	5.56069e+09	3.4104e+09	4.53112e+09	4.4814e+09	5.16628e+09	4.29109e+09	4.37748e+09	4.32458e+09
363neg		Cer(m40:1+O)+HCOO	Cer(m40:1+O)+HCOO	Cer	(m40:1+O)	(m40:1+O)				C41 H80 O5 N1	666.604	814.62	0.0736619	0.909783	0.569853	0.096584	7.15914e+06	7.13874e+06	5.47854e+06	5.52692e+06	4.27868e+06	5.60985e+06	7.52986e+06	2.55145e+06	5.73606e+06	7.94269e+06	1.55241e+06	7.05407e+06	6.42755e+06	4.86898e+06	1.03007e+07	4.4671e+06	4.28052e+06	4.98721e+06	7.29231e+06	5.18373e+06	8.7546e+06	6.57311e+06	6.47543e+06	6.28068e+06	3.00306e+06	3.00827e+06	3.40616e+06
3645pos		PC(12:0_24:0)+H	PC(36:0)+H	PC	(12:0_24:0)	(12:0)	(24:0)			C44 H89 O8 N1 P1	790.632	753.66	0.0763628	1.12088	0.403953	0.28035	2.27481e+08	2.02042e+08	2.11992e+08	3.00798e+08	2.2585e+08	2.11052e+08	3.7157e+08	2.08744e+08	1.99478e+08	2.28482e+08	1.72448e+08	1.86267e+08	2.08894e+08	1.44385e+08	2.82271e+08	1.89363e+08	2.29633e+08	2.2431e+08	2.62447e+08	1.69544e+08	3.83601e+08	2.49967e+08	1.99713e+08	2.05396e+08	1.57652e+08	1.81843e+08	1.78882e+08
3657pos		PC(36:1)+H	PC(36:1)+H	PC	(36:1)	(36:1)				C44 H87 O8 N1 P1	788.616	223.98	0.00684044	1.53075	0.117556	0.084167	1.39254e+06	1.28407e+06	2.17726e+06	2.81671e+06	3.08336e+06	3.53066e+06	1.0775e+06	3.36044e+06	4.44236e+06	1.96235e+06	1.22029e+06	1.05014e+06	1.24442e+06	1.68871e+06	1.44777e+06	2.6928e+06	3.64646e+06	2.91858e+06	2.32736e+06	6.92085e+06	5.43205e+06	3.42475e+06	3.88375e+06	7.68185e+06	3.81692e+06	3.86244e+06	3.81715e+06
3664pos		PC(36:1)+Na	PC(36:1)+Na	PC	(36:1)	(36:1)				C44 H86 O8 N1 P1 Na1	810.598	631.86	0.0229642	1.26531	0.0717563	0.88359	6.01605e+08	8.5068e+08	6.78975e+08	1.17926e+09	1.16665e+09	8.15809e+08	7.71879e+08	1.52651e+09	1.24192e+09	1.23352e+09	9.53244e+08	7.38506e+08	9.75185e+08	9.40217e+08	7.8807e+08	1.02257e+09	1.06583e+09	1.48524e+09	1.23781e+09	1.32111e+09	1.10088e+09	1.41614e+09	1.14227e+09	1.05704e+09	9.0446e+08	9.44116e+08	9.11646e+08
3665pos		PC(22:0_14:1)+H	PC(36:1)+H	PC	(22:0_14:1)	(22:0)	(14:1)			C44 H87 O8 N1 P1	788.616	685.084	0.205744	3.35514	0.364623	0.454855	1.21756e+07	1.10948e+07	1.9887e+07	7.49216e+06	1.73449e+07	8.08257e+06	1.37614e+07	8.28983e+06	8.70064e+06	1.72122e+07	1.34519e+07	5.83919e+06	6.67888e+06	8.55792e+07	1.68452e+07	6.12915e+06	1.6689e+07	1.09877e+07	2.28547e+07	1.64457e+07	1.965e+07	2.15636e+08	1.53159e+07	8.88291e+06	4.07185e+07	5.59139e+07	3.90176e+07
366neg		Cer(m41:0+O)+HCOO	Cer(m41:0+O)+HCOO	Cer	(m41:0+O)	(m41:0+O)				C42 H84 O5 N1	682.635	891.391	0.00794242	0.836217	0.432064	0.375518	2.12327e+07	2.161e+07	1.63594e+07	2.03316e+07	1.72198e+07	2.47899e+07	2.15637e+07	7.38903e+06	2.74268e+07	3.59548e+07	3.87533e+06	2.13667e+07	1.9255e+07	2.00291e+07	3.20067e+07	2.11361e+07	1.47786e+07	1.73456e+07	2.12532e+07	2.61402e+07	3.68624e+07	2.1535e+07	1.65183e+07	1.8086e+07	1.26402e+07	1.26423e+07	1.2816e+07
3670pos		PC(15:0_21:1)+H	PC(36:1)+H	PC	(15:0_21:1)	(15:0)	(21:1)			C44 H87 O8 N1 P1	788.616	704.903	0.0676605	1.11385	0.151872	2.71571	1.16008e+10	1.15027e+10	1.03446e+10	1.96898e+10	1.08631e+10	1.2223e+10	1.08168e+10	1.08741e+10	1.10914e+10	1.01224e+10	1.30941e+10	1.0549e+10	9.75911e+09	1.04735e+10	1.01929e+10	1.12055e+10	1.71853e+10	1.26556e+10	1.06075e+10	1.38354e+10	1.33311e+10	1.48949e+10	1.18522e+10	1.30537e+10	9.43548e+09	1.07887e+10	1.03407e+10
3671pos		PC(36:1)+Na	PC(36:1)+Na	PC	(15:0_21:1)	(15:0)	(21:1)			C44 H86 O8 N1 P1 Na1	810.598	704.903	0.146679	0.80092	0.486527	1.43978	2.8253e+08	6.01291e+08	3.34345e+08	7.27202e+08	2.68204e+08	9.63699e+08	6.88399e+08	2.32678e+08	2.42474e+08	1.97715e+08	5.64538e+08	5.6695e+08	3.64083e+08	4.99154e+08	3.02108e+08	4.49258e+08	2.80992e+08	4.99508e+08	2.61046e+08	2.45006e+08	2.64027e+08	5.75224e+08	3.54234e+08	5.79839e+08	4.14281e+08	5.40171e+08	5.41796e+08
369neg		Cer(t16:1_16:0)+HCOO	Cer(t32:1)+HCOO	Cer	(t16:1_16:0)	(t16:1)	(16:0)			C33 H64 O6 N1	570.474	524.789	0.0718361	1.15254	0.312933	0.283767	1.82216e+06	1.79197e+06	1.92784e+06	4.79807e+06	3.27329e+06	3.96632e+06	1.94571e+06	3.74149e+06	5.67227e+06	2.95701e+06	1.6336e+06	3.17484e+06	3.71039e+06	3.70264e+06	1.53506e+06	3.46916e+06	2.2836e+06	3.7584e+06	2.0294e+06	3.78701e+06	2.26674e+06	3.35253e+06	2.98596e+06	4.59843e+06	2.27298e+06	2.36903e+06	2.61005e+06
370neg		Cer(t18:0_16:0)+HCOO	Cer(t34:0)+HCOO	Cer	(t18:0_16:0)	(t18:0)	(16:0)			C35 H70 O6 N1	600.521	592.2	0.00202138	0.937502	0.719584	0.335808	6.4121e+06	1.54421e+07	9.53299e+06	1.65366e+07	1.23204e+07	1.56556e+07	1.27633e+07	7.58497e+06	1.4857e+07	1.51008e+07	2.18208e+06	1.40366e+07	1.05912e+07	1.36301e+07	1.22089e+07	1.18521e+07	1.02901e+07	1.27589e+07	1.21292e+07	1.35555e+07	2.40395e+07	1.28706e+07	1.1547e+07	1.40828e+07	1.10507e+07	1.1012e+07	1.10506e+07
3739pos		PC(36:2)+H	PC(36:2)+H	PC	(17:1_19:1)	(17:1)	(19:1)			C44 H85 O8 N1 P1	786.601	652.399	0.0486524	0.912878	0.439347	8.03557	1.63773e+10	1.13996e+10	1.93809e+10	1.18727e+10	1.91817e+10	1.32464e+10	1.34047e+10	1.23957e+10	1.15136e+10	1.85685e+10	1.79269e+10	1.25516e+10	1.14034e+10	1.17988e+10	1.24715e+10	1.25846e+10	1.35045e+10	1.30458e+10	1.31571e+10	1.24047e+10	1.40355e+10	1.71565e+10	1.23924e+10	1.44961e+10	1.09631e+10	1.20032e+10	1.18652e+10
3743pos		PC(36:2)+H	PC(36:2)+H	PC	(36:2)	(36:2)				C44 H85 O8 N1 P1	786.601	674.29	0.143932	1.08529	0.836266	0.741766	8.49321e+08	7.44607e+07	1.07227e+09	8.07542e+08	7.60378e+08	7.14288e+07	5.60569e+07	7.18242e+08	9.58047e+08	1.18163e+09	5.93741e+07	3.73719e+08	7.24207e+07	8.11895e+08	9.52033e+08	5.79753e+08	1.18953e+09	6.43276e+08	1.23383e+09	6.90371e+08	8.53111e+08	8.35398e+08	8.88179e+08	6.95701e+08	2.04595e+08	1.58019e+08	1.64276e+08
375pos		Cer(d18:2_20:0)+H	Cer(d38:2)+H	Cer	(d18:2_20:0)	(d18:2)	(20:0)			C38 H74 O3 N1	592.566	725.889	0.0716004	1.16172	0.44638	0.203975	7.22377e+08	2.29653e+08	2.48074e+08	5.42267e+08	4.91942e+08	2.76345e+08	2.70441e+08	3.93646e+08	3.2801e+08	2.66011e+08	5.82532e+08	2.61525e+08	2.48489e+08	2.63812e+08	2.83299e+08	2.72674e+08	6.19976e+08	5.88359e+08	3.48882e+08	2.79225e+08	3.25919e+08	3.53553e+08	2.6752e+08	5.40732e+08	2.41755e+08	2.72345e+08	2.76165e+08
376pos		Cer(d38:2)+H-H2O	Cer(d38:2)+H-H2O	Cer	(d18:2_20:0)	(d18:2)	(20:0)			C38 H72 O2 N1	574.556	725.889	0.0660635	1.0966	0.58187	0.408204	5.48301e+08	2.24927e+08	2.0237e+08	4.01044e+08	3.58696e+08	2.16039e+08	1.91361e+08	2.81025e+08	2.42186e+08	1.9233e+08	4.32702e+08	1.99888e+08	1.95003e+08	1.97728e+08	2.17993e+08	2.10037e+08	4.53272e+08	4.10871e+08	2.57115e+08	2.00311e+08	2.40925e+08	2.62078e+08	1.99068e+08	4.03048e+08	1.83056e+08	2.02206e+08	2.08026e+08
3776pos		PC(12:0e_24:2)+H	PC(36:2e)+H	PC	(12:0e_24:2)	(12:0e)	(24:2)			C44 H87 O7 N1 P1	772.621	324.66	0.0412784	1.75976	0.0713915	0.170926	3.28463e+06	2.76418e+06	8.00016e+06	6.53605e+06	6.27938e+06	7.19035e+06	6.64931e+06	7.31746e+06	9.99305e+06	4.29696e+06	3.84283e+06	2.40226e+06	2.90038e+06	6.76491e+06	3.69044e+06	6.15584e+06	7.87248e+06	6.09813e+06	4.95916e+06	1.65367e+07	1.31515e+07	7.44991e+06	1.21664e+07	1.81789e+07	7.95507e+06	7.93868e+06	7.3921e+06
3784pos		PC(18:1e_18:1)+H	PC(36:2e)+H	PC	(18:1e_18:1)	(18:1e)	(18:1)			C44 H87 O7 N1 P1	772.621	723.755	0.0591527	1.54169	0.0384647	0.59369	5.62221e+07	4.8643e+07	4.70079e+07	1.06753e+08	7.64623e+07	4.61783e+07	3.7587e+07	1.08999e+08	7.44703e+07	5.09969e+07	5.93746e+07	4.77962e+07	7.56312e+07	5.4489e+07	4.3558e+07	5.11345e+07	6.5106e+07	1.27136e+08	1.17834e+08	8.25072e+07	7.04012e+07	1.03755e+08	1.12116e+08	1.28075e+08	4.86839e+07	5.41311e+07	5.39383e+07
378neg		Cer(t16:0_22:0)+HCOO	Cer(t38:0)+HCOO	Cer	(t16:0_22:0)	(t16:0)	(22:0)			C39 H78 O6 N1	656.583	747.888	0.0153882	0.920835	0.551778	0.11262	4.04117e+07	5.20156e+07	2.83938e+07	4.79083e+07	5.47781e+07	5.55874e+07	1.9765e+07	1.58484e+07	5.97387e+07	4.66572e+07	7.56492e+06	4.93621e+07	5.16746e+07	4.92736e+07	3.09095e+07	5.46419e+07	3.42723e+07	5.71989e+07	5.37081e+07	4.95491e+07	5.19178e+07	5.90162e+07	5.17448e+07	6.04005e+07	3.3465e+07	3.43969e+07	3.43473e+07
3805pos		PC(36:3)+H	PC(36:3)+H	PC	(36:3)	(36:3)				C44 H83 O8 N1 P1	784.585	517.44	0.079031	0.155453	0.205447	1.25488	3.64442e+08	3.98616e+06	4.40321e+08	4.9453e+06	4.3503e+08	4.7979e+08	1.30843e+08	5.61996e+06	4.9612e+06	3.96975e+06	4.80868e+06	3.86831e+06	6.1169e+06	5.33283e+06	1.6146e+08	5.99505e+06	3.03924e+06	3.63677e+06	6.91756e+06	3.89224e+06	1.0584e+08	1.85076e+07	5.40395e+06	5.35959e+06	5.94648e+06	5.11942e+06	5.31871e+06
3808pos		PC(24:0_12:3)+H	PC(36:3)+H	PC	(24:0_12:3)	(24:0)	(12:3)			C44 H83 O8 N1 P1	784.585	587.46	0.0151011	1.03563	0.835841	2.19164	9.37394e+09	3.95237e+09	1.10426e+10	6.5261e+09	8.99762e+09	4.21311e+09	6.45657e+09	7.34218e+09	6.49975e+09	9.04712e+09	9.07546e+09	4.36902e+09	5.95853e+09	6.46165e+09	7.24376e+09	6.55776e+09	9.47584e+09	6.60814e+09	7.14294e+09	7.68902e+09	5.0818e+09	7.55975e+09	6.51581e+09	7.03836e+09	6.32983e+09	6.46479e+09	6.51853e+09
380neg		Cer(t18:0_22:0)-H	Cer(t40:0)-H	Cer	(t18:0_22:0)	(t18:0)	(22:0)			C40 H80 O4 N1	638.609	820.104	0.0474269	0.867228	0.396418	0.123547	1.87497e+06	5.65222e+06	2.29587e+07	4.7696e+06	5.13761e+06	6.2495e+06	2.08588e+06	1.42578e+06	5.26044e+06	5.96371e+06	430922	4.89512e+06	5.12557e+06	4.41297e+06	1.54343e+06	4.7078e+06	1.70414e+06	4.78817e+06	4.87192e+06	5.05695e+06	7.27694e+06	5.5298e+06	4.2729e+06	5.60792e+06	1.96038e+06	1.80412e+06	1.96143e+06
3823pos		PC(25:1_11:2)+H	PC(36:3)+H	PC	(25:1_11:2)	(25:1)	(11:2)			C44 H83 O8 N1 P1	784.585	1326.42	0.212534	3.42006	0.0952223	0.58182	338737	274516	4.42227e+07	3.42509e+06	2.60355e+06	2.37973e+06	8.69859e+06	9.58751e+07	1.82748e+07	5.44546e+07	3.50588e+06	184015	69269.3	3.6566e+07	1.40441e+06	80244	2.66847e+07	1.04132e+07	1.80503e+07	795891	3.70607e+07	5.769e+07	6.54744e+07	4.81142e+07	2.50738e+07	2.9661e+07	3.80352e+07
3831pos		PC(12:1e_24:2)+H	PC(36:3e)+H	PC	(12:1e_24:2)	(12:1e)	(24:2)			C44 H85 O7 N1 P1	770.606	741.386	0.0770597	1.41138	0.0454762	0.345433	4.07991e+07	3.8848e+07	1.9583e+07	4.50723e+07	4.28566e+07	3.8138e+07	2.25791e+07	7.79809e+07	5.80322e+07	5.57579e+07	3.40703e+07	3.6769e+07	4.00239e+07	4.41583e+07	3.9312e+07	4.52893e+07	4.15232e+07	7.47664e+07	6.30282e+07	6.7764e+07	4.78918e+07	6.64434e+07	8.15848e+07	7.49635e+07	4.11913e+07	4.7881e+07	4.6159e+07
3855pos		PC(18:2_18:2)+Na	PC(36:4)+Na	PC	(18:2_18:2)	(18:2)	(18:2)			C44 H80 O8 N1 P1 Na1	804.551	488.461	0.00477877	1.05511	0.85608	0.901483	1.07703e+09	8.72247e+08	1.09855e+09	8.45572e+08	7.15869e+08	9.42817e+08	2.83178e+08	1.75511e+09	1.02964e+09	5.93618e+08	1.11024e+09	3.69886e+08	5.72754e+08	6.97395e+08	3.32793e+08	1.46014e+09	1.2319e+09	8.64892e+08	1.2754e+09	9.7609e+08	3.42982e+08	7.10703e+08	7.86244e+08	1.76056e+09	7.42256e+08	7.36134e+08	7.36158e+08
3858pos		PC(36:4)+H	PC(36:4)+H	PC	(36:4)	(36:4)				C44 H81 O8 N1 P1	782.569	530.961	0.0578619	0.681885	0.204825	5.07181	5.0349e+09	1.90837e+09	6.21319e+09	2.35402e+09	6.20652e+09	6.58924e+09	1.79915e+09	3.75924e+09	3.11883e+09	5.34843e+09	4.32279e+09	1.72887e+09	2.13937e+09	2.08332e+09	2.23519e+09	3.12046e+09	4.48075e+09	2.86388e+09	3.00594e+09	2.97509e+09	1.51347e+09	3.95182e+09	2.67437e+09	4.12559e+09	3.01164e+09	3.32438e+09	3.01252e+09
385neg		Cer(t18:0_24:0)-H	Cer(t42:0)-H	Cer	(t18:0_24:0)	(t18:0)	(24:0)			C42 H84 O4 N1	666.641	865.494	0.573489	0.937979	0.795938	0.110934	680340	2.34437e+06	627930	2.12029e+06	2.21552e+06	2.71905e+06	1.47751e+06	753818	2.38056e+06	2.75907e+06	235221	2.53809e+06	2.20176e+06	2.20024e+06	1.37687e+06	2.3906e+06	1.03444e+06	1.90591e+06	1.72822e+06	2.55239e+06	4.65957e+06	2.27518e+06	1.62093e+06	2.76509e+06	1.65072e+06	1.68991e+06	4.15039e+06
3865pos		PC(24:0_12:4)+H	PC(36:4)+H	PC	(24:0_12:4)	(24:0)	(12:4)			C44 H81 O8 N1 P1	782.569	639.23	0.0112519	0.873552	0.446099	0.664442	1.04257e+08	2.33508e+08	1.24089e+08	1.05512e+08	1.24185e+08	1.75497e+08	1.39564e+08	1.33256e+08	1.19633e+08	1.33698e+08	1.27531e+08	1.03445e+08	1.79866e+08	1.12923e+08	1.11392e+08	1.13361e+08	1.15909e+08	1.03091e+08	1.06287e+08	1.11741e+08	1.16108e+08	1.17105e+08	1.16349e+08	1.06706e+08	1.1619e+08	1.18484e+08	1.18485e+08
386neg		Cer(t18:0_24:1)-H	Cer(t42:1)-H	Cer	(t18:0_24:1)	(t18:0)	(24:1)			C42 H82 O4 N1	664.625	806.34	0.481776	1.01007	0.948214	0.0762989	922859	1.48207e+06	887757	1.5367e+06	1.43096e+06	2.03333e+06	910263	496624	1.54892e+06	1.5072e+06	199157	1.50693e+06	1.84758e+06	1.63824e+06	763952	1.4643e+06	1.02118e+06	1.82814e+06	1.50844e+06	1.56088e+06	1.78167e+06	1.86621e+06	1.74405e+06	1.9103e+06	1.45543e+06	1.50786e+06	3.1936e+06
389neg		Cer(t44:1)+HCOO	Cer(t44:1)+HCOO	Cer	(t44:1)	(t44:1)				C45 H88 O6 N1	738.662	900.899	0.047386	0.873841	0.530243	0.186675	4.71718e+06	4.14552e+06	4.46208e+06	5.28354e+06	4.31457e+06	5.51934e+06	4.60056e+06	1.46816e+06	4.50197e+06	5.16494e+06	1.42731e+06	5.22441e+06	3.47116e+06	5.9337e+06	6.5208e+06	4.76178e+06	5.34373e+06	4.19254e+06	4.68453e+06	4.79925e+06	8.24092e+06	4.5539e+06	3.46129e+06	3.13634e+06	1.78958e+06	1.94327e+06	1.9466e+06
3901pos		PC(18:0e_18:4)+H	PC(36:4e)+H	PC	(18:0e_18:4)	(18:0e)	(18:4)			C44 H83 O7 N1 P1	768.59	608.219	0.0297401	1.34254	0.0590014	1.50201	9.14914e+08	1.30252e+09	8.22544e+08	1.74345e+09	1.77486e+09	1.32872e+09	6.46871e+08	2.4493e+09	2.16434e+09	1.50118e+09	8.97535e+08	1.21772e+09	1.24753e+09	1.45098e+09	6.83331e+08	1.99041e+09	1.00939e+09	2.40516e+09	2.03039e+09	1.79996e+09	1.58254e+09	2.18357e+09	2.42343e+09	2.39877e+09	1.28868e+09	1.32556e+09	1.36757e+09
3918pos		PC(36:5)+H	PC(36:5)+H	PC	(36:5)	(36:5)				C44 H79 O8 N1 P1	780.554	508.671	0.0171605	1.18265	0.352175	0.130534	3.8846e+08	1.87895e+08	4.05335e+08	3.44306e+08	3.09856e+08	3.57109e+08	2.5911e+08	4.8468e+08	3.56417e+08	3.03542e+08	3.88561e+08	1.29542e+08	3.09724e+08	2.58999e+08	2.30641e+08	4.36697e+08	5.03095e+08	3.15197e+08	3.88427e+08	4.20245e+08	2.55459e+08	3.28354e+08	2.89147e+08	4.35207e+08	3.01915e+08	3.11064e+08	3.11077e+08
3935pos		PC(18:3e_18:2)+H	PC(36:5e)+H	PC	(18:3e_18:2)	(18:3e)	(18:2)			C44 H81 O7 N1 P1	766.575	586.26	0.0319686	1.22095	0.231231	0.338453	2.1582e+09	2.48176e+09	2.50444e+09	2.53996e+09	2.63066e+09	1.70675e+09	1.57759e+09	3.6157e+09	3.13254e+09	2.21166e+09	2.57511e+09	2.23857e+09	2.20209e+09	2.56751e+09	1.76501e+09	2.81744e+09	2.52654e+09	3.75534e+09	4.17492e+09	2.38948e+09	2.45346e+09	3.03167e+09	3.79843e+09	3.49159e+09	2.23706e+09	2.3784e+09	2.34686e+09
3957pos		PC(22:3_14:3)+H	PC(36:6)+H	PC	(22:3_14:3)	(22:3)	(14:3)			C44 H77 O8 N1 P1	778.538	603.624	0.0548485	1.05792	0.588347	0.58486	5.97495e+08	2.09604e+08	5.98956e+08	2.32073e+08	2.3671e+08	2.72157e+08	1.99145e+08	3.31408e+08	2.49527e+08	2.46983e+08	4.22272e+08	2.33394e+08	2.51883e+08	2.43244e+08	2.05634e+08	2.42367e+08	5.37677e+08	2.39152e+08	2.10359e+08	2.86602e+08	1.65907e+08	2.27081e+08	2.75403e+08	3.79092e+08	2.12879e+08	2.35582e+08	2.33135e+08
3963pos		PC(18:3e_18:3)+H	PC(36:6e)+H	PC	(18:3e_18:3)	(18:3e)	(18:3)			C44 H79 O7 N1 P1	764.559	516.6	0.663418	0.946213	0.830545	0.300809	5.43656e+07	4.47071e+07	5.02879e+07	5.9239e+07	7.36476e+07	1.09119e+08	1.27248e+07	5.95252e+07	1.10709e+08	3.84012e+07	4.77098e+07	2.67173e+07	4.08684e+07	8.3089e+07	1.69986e+07	6.14583e+07	6.08155e+07	7.7443e+07	7.27035e+07	7.65285e+07	2.58772e+07	6.54119e+07	7.65223e+07	1.07154e+08	4.07187e+07	4.06793e+07	6.8846e+06
396neg		CerP(t45:6)+HCOO	CerP(t45:6)+HCOO	CerP	(t45:6)	(t45:6)				C46 H81 O9 N1 P1	822.565	766.705	0.00179288	0.989596	0.95422	0.358518	7.10284e+06	1.08715e+07	7.51119e+06	6.10513e+06	1.01468e+07	1.28898e+07	1.91204e+06	4.37108e+06	9.19202e+06	8.0456e+06	1.61616e+06	1.01814e+07	1.41676e+07	7.7804e+06	3.94839e+06	8.49573e+06	7.54062e+06	1.22541e+07	9.23185e+06	7.73427e+06	5.46388e+06	1.25207e+07	1.19511e+07	1.23209e+07	7.9702e+06	7.99719e+06	7.99197e+06
3979pos		PC(36:7)+H	PC(36:7)+H	PC	(36:7)	(36:7)				C44 H75 O8 N1 P1	776.522	487.062	0.0259307	1.13388	0.572741	0.061777	1.91477e+06	3.24712e+06	2.39436e+06	4.65801e+06	4.51127e+06	6.24544e+06	3.5535e+06	5.96769e+06	4.21024e+06	5.08346e+06	3.28531e+06	1.47946e+06	2.50367e+06	3.97683e+06	1.87253e+06	4.87169e+06	3.71177e+06	3.83884e+06	4.53918e+06	4.27037e+06	7.28766e+06	4.75593e+06	4.11323e+06	4.63938e+06	3.50129e+06	3.5042e+06	3.66243e+06
397neg		DGDG(32:7)+HCOO	DGDG(32:7)+HCOO	DGDG	(32:7)	(32:7)				C48 H75 O17	923.501	274.832	0.208707	0.599271	0.111926	2.39972	2.95218e+07	2.18044e+08	1.16542e+08	1.36909e+08	6.97408e+07	9.99199e+07	6.67884e+06	6.18092e+07	2.15614e+08	8.10764e+07	6.19813e+07	1.01013e+08	1.35382e+08	6.35102e+07	1.80021e+07	1.38463e+08	4.98003e+07	5.74699e+07	1.21853e+08	9.48246e+07	2.2212e+07	6.98693e+07	6.77425e+07	2.27826e+08	4.83352e+07	7.1319e+07	7.13924e+07
3980pos		PC(22:3_14:4)+H	PC(36:7)+H	PC	(22:3_14:4)	(22:3)	(14:4)			C44 H75 O8 N1 P1	776.522	539.931	0.00584544	1.06493	0.75553	0.120504	7.40963e+07	1.91734e+07	7.77867e+07	2.51307e+07	2.78637e+07	4.03698e+07	1.35321e+07	4.21601e+07	3.22886e+07	2.62203e+07	5.12914e+07	1.61002e+07	2.59122e+07	2.50815e+07	2.49655e+07	3.34661e+07	7.20638e+07	2.96656e+07	3.28702e+07	3.91545e+07	1.14077e+07	3.10915e+07	3.29176e+07	4.37533e+07	3.0442e+07	3.04396e+07	3.01336e+07
3983pos		PC(36:7e)+H	PC(36:7e)+H	PC	(36:7e)	(36:7e)				C44 H77 O7 N1 P1	762.543	493.02	0.0254289	0.854744	0.476645	0.249469	1.43254e+07	1.53497e+07	1.51795e+07	1.62671e+07	2.10314e+07	2.73791e+07	1.11287e+08	1.59518e+07	2.6452e+07	1.03108e+07	1.51018e+07	8.3856e+06	1.11397e+07	1.96143e+07	1.23902e+08	1.52652e+07	1.80223e+07	1.81858e+07	2.2374e+07	1.74916e+07	9.39486e+06	1.51532e+07	1.9778e+07	2.62456e+07	1.50309e+07	1.57021e+07	1.50295e+07
3986pos		PC(14:1e_22:6)+H	PC(36:7e)+H	PC	(14:1e_22:6)	(14:1e)	(22:6)			C44 H77 O7 N1 P1	762.543	632.078	0.231442	1.09725	0.776564	0.175564	1.73604e+08	7.34868e+07	1.85844e+08	8.25984e+07	8.12837e+07	3.29298e+07	6.66984e+07	2.10114e+08	9.71528e+07	9.7266e+07	1.68199e+08	8.4213e+07	7.73053e+07	9.37029e+07	7.97532e+07	1.00776e+08	1.77885e+08	7.45602e+07	1.55268e+08	7.53619e+07	3.64084e+07	9.53641e+07	8.16998e+07	1.28558e+08	9.10052e+07	9.43648e+07	1.35456e+08
3988pos		PC(37:0)+H	PC(37:0)+H	PC	(37:0)	(37:0)				C45 H91 O8 N1 P1	804.648	793.253	0.12987	1.24256	0.506153	0.0321623	2.02325e+07	3.74003e+06	7.04949e+06	6.20036e+06	3.58437e+06	6.88771e+06	8.14939e+06	1.80662e+07	6.71567e+06	1.4028e+07	1.27269e+07	5.39986e+06	6.51816e+06	6.45935e+06	9.37392e+06	1.12338e+07	1.61131e+07	7.91293e+06	8.87397e+06	1.17206e+07	6.10264e+06	8.49434e+06	5.73187e+06	8.89009e+06	5.36457e+06	6.02294e+06	6.94447e+06
398neg		DGDG(34:10)+HCOO	DGDG(34:10)+HCOO	DGDG	(34:10)	(34:10)				C50 H73 O17	945.485	271.02	0.114843	0.972687	0.936916	0.314407	5.0509e+06	1.05645e+07	1.17653e+07	2.35788e+07	2.04639e+07	2.81051e+07	848030	1.08452e+07	1.58021e+07	5.47064e+06	7.97443e+06	1.73481e+07	1.31346e+07	5.47882e+06	3.26936e+06	2.21468e+07	1.57934e+07	2.3905e+07	4.76556e+06	6.68531e+06	1.57286e+06	1.63976e+07	1.8494e+07	1.81216e+07	1.3613e+07	1.10643e+07	1.35901e+07
3994pos		PC(16:0_21:1)+H	PC(37:1)+H	PC	(16:0_21:1)	(16:0)	(21:1)			C45 H89 O8 N1 P1	802.632	735.309	0.0753152	1.41628	0.0397422	0.883505	7.10151e+08	1.7169e+08	2.3321e+08	3.68142e+08	2.72823e+08	2.01074e+08	2.41451e+08	4.87702e+08	3.006e+08	2.70881e+08	5.1669e+08	1.75759e+08	2.65051e+08	2.30745e+08	3.39237e+08	1.7289e+08	7.16172e+08	3.25493e+08	2.97175e+08	4.38145e+08	2.57873e+08	3.20942e+08	3.10725e+08	5.01533e+08	2.2818e+08	2.39472e+08	2.64105e+08
3996pos		PC(31:1_6:0)+H	PC(37:1)+H	PC	(31:1_6:0)	(31:1)	(6:0)			C45 H89 O8 N1 P1	802.632	839.46	0.0240088	1.21503	0.132791	0.0121454	7.22445e+06	3.10354e+06	4.7546e+06	1.23498e+07	3.35053e+06	3.41939e+06	6.44169e+06	5.42514e+06	3.9768e+06	3.30922e+06	6.33211e+06	3.62412e+06	2.90075e+06	3.39481e+06	3.81942e+06	4.72155e+06	7.98153e+06	5.27477e+06	3.22767e+06	5.83139e+06	3.1772e+06	3.81514e+06	3.74952e+06	6.08642e+06	3.29847e+06	3.43935e+06	3.43974e+06
3999pos		PC(23:0_14:2)+H	PC(37:2)+H	PC	(23:0_14:2)	(23:0)	(14:2)			C45 H87 O8 N1 P1	800.616	681.902	0.0467937	1.00608	0.970688	0.652344	1.01105e+09	1.80429e+08	6.15811e+08	3.73919e+08	3.50596e+08	3.13468e+08	3.4064e+08	4.54654e+08	3.16086e+08	5.13693e+08	7.67051e+08	2.73247e+08	2.91856e+08	3.39679e+08	6.19219e+08	3.03492e+08	9.01052e+08	2.8681e+08	3.09876e+08	3.75975e+08	2.78976e+08	3.21532e+08	3.19281e+08	4.07106e+08	2.92668e+08	3.21349e+08	3.09307e+08
3neg		CL(68:2)-H	CL(68:2)-H	CL	(68:2)	(68:2)				C77 H145 O17 P2	1404	1018.2	0.0124292	0.835878	0.323663	0.141756	4.74758e+06	4.22562e+06	4.0603e+06	5.17007e+06	2.1834e+06	4.87856e+06	1.95646e+06	2.36566e+06	4.14822e+06	5.92974e+06	2.38679e+06	3.0752e+06	4.33294e+06	5.52328e+06	3.05359e+06	4.90649e+06	4.40187e+06	3.51614e+06	3.43625e+06	4.66404e+06	3.89204e+06	2.8992e+06	2.82837e+06	1.38389e+06	2.75055e+06	2.75009e+06	2.69153e+06
4007pos		PC(37:2e)+H	PC(37:2e)+H	PC	(37:2e)	(37:2e)				C45 H89 O7 N1 P1	786.637	840.373	0.227266	0.918194	0.745662	0.0585895	1.17086e+06	1.14148e+06	1.77042e+06	943234	1.76272e+06	659216	1.38126e+06	765910	1.61384e+06	1.32171e+06	1.66885e+06	3.28756e+06	1.85607e+06	1.93441e+06	1.57757e+06	1.98277e+06	889773	1.88734e+06	1.82444e+06	1.63643e+06	1.60901e+06	1.77212e+06	1.28885e+06	1.34895e+06	2.1254e+06	1.48406e+06	1.44282e+06
4008pos		PC(19:0_18:3)+Na	PC(37:3)+Na	PC	(19:0_18:3)	(19:0)	(18:3)			C45 H84 O8 N1 P1 Na1	820.583	588.084	0.0152884	1.29692	0.15803	0.915348	1.52279e+09	5.54406e+08	1.52269e+09	8.33728e+08	8.24714e+08	5.14688e+08	4.46332e+08	1.26613e+09	1.08024e+09	8.48056e+08	1.40336e+09	6.00969e+08	7.52072e+08	8.82456e+08	5.84011e+08	9.42204e+08	1.50316e+09	1.06417e+09	9.5276e+08	9.65376e+08	4.74362e+08	8.7498e+08	1.13934e+09	1.25324e+09	8.73323e+08	8.96689e+08	8.97036e+08
4009pos		PC(27:1_10:2)+H	PC(37:3)+H	PC	(27:1_10:2)	(27:1)	(10:2)			C45 H85 O8 N1 P1	798.601	599.417	0.0654153	1.37917	0.00609743	0.479285	1.77383e+08	7.98188e+07	2.14715e+08	1.16527e+08	1.14953e+08	8.39646e+07	1.26303e+08	1.73891e+08	1.12891e+08	1.09097e+08	1.49687e+08	1.20472e+08	1.09502e+08	1.09035e+08	1.26887e+08	1.03551e+08	2.28985e+08	1.4113e+08	1.07256e+08	1.12029e+08	1.27946e+08	1.4397e+08	1.52524e+08	1.50413e+08	9.61748e+07	1.07894e+08	1.08028e+08
400neg		DGDG(38:4)-H	DGDG(38:4)-H	DGDG	(38:4)	(38:4)				C53 H91 O15	967.636	756.292	0.00319566	0.913971	0.458388	0.182988	1.36495e+07	1.43071e+07	1.42701e+07	9.84102e+06	1.33182e+07	1.33571e+07	9.3898e+06	5.81914e+06	1.5373e+07	1.27856e+07	4.09824e+06	1.37172e+07	1.53757e+07	1.32942e+07	1.35904e+07	1.40296e+07	1.2596e+07	1.33174e+07	1.42386e+07	1.33589e+07	1.06213e+07	1.46268e+07	1.49328e+07	1.40828e+07	1.43665e+07	1.42871e+07	1.42874e+07
4019pos		PC(19:1_18:3)+H	PC(37:4)+H	PC	(19:1_18:3)	(19:1)	(18:3)			C45 H83 O8 N1 P1	796.585	597.948	0.0488285	1.39692	0.0338334	0.428396	1.93608e+08	6.73052e+07	2.38851e+08	9.63568e+07	8.83655e+07	5.11953e+07	1.06976e+08	1.62047e+08	9.73664e+07	9.62693e+07	1.49173e+08	7.88754e+07	9.00174e+07	8.18111e+07	1.08228e+08	9.52596e+07	2.07841e+08	1.03162e+08	9.65296e+07	1.01961e+08	9.46706e+07	1.08778e+08	1.09809e+08	1.27691e+08	9.39764e+07	1.0278e+08	9.52727e+07
401neg		FA(20:1)-H	FA(20:1)-H	FA	(20:1)	(20:1)				O2 H37 C20	309.28	150.131	0.00897388	2.35165	0.0402096	0.786895	8.39178e+06	2.60363e+06	1.18698e+06	2.77306e+06	2.64121e+06	2.56118e+06	1.38292e+06	9.1018e+06	5.5367e+06	2.02759e+06	1.83042e+06	2.44036e+06	5.92835e+06	1.80358e+06	2.49384e+06	4.8476e+06	1.54145e+06	1.15364e+07	3.27928e+06	4.39043e+06	2.44026e+06	4.96885e+06	2.60005e+06	8.57937e+06	3.49153e+06	3.54541e+06	3.49023e+06
4023pos		PC(37:4)+H	PC(37:4)+H	PC	(37:4)	(37:4)				C45 H83 O8 N1 P1	796.585	785.46	0.0444281	1.09351	0.555067	0.106616	9.5997e+06	8.86239e+06	6.67851e+06	6.8244e+06	5.87849e+06	6.76955e+06	3.15201e+06	9.35304e+06	6.4994e+06	7.69745e+06	6.7804e+06	1.04724e+07	8.41905e+06	5.64557e+06	4.82467e+06	7.08988e+06	7.55813e+06	1.0057e+07	7.20377e+06	6.33653e+06	4.25355e+06	7.86048e+06	1.13252e+07	9.68824e+06	5.66881e+06	5.74987e+06	6.15461e+06
402neg		FA(20:1)-H	FA(20:1)-H	FA	(20:1)	(20:1)				O2 H37 C20	309.28	375.141	0.0255988	0.479307	0.0213847	0.889058	1.04544e+07	9.23792e+06	9.34574e+06	4.74642e+06	1.05047e+07	1.55285e+07	3.46401e+06	6.56363e+06	4.63818e+06	9.16981e+06	6.27697e+06	5.97315e+06	5.11332e+06	2.42291e+06	5.99598e+06	4.59348e+06	6.32704e+06	6.41328e+06	4.55452e+06	4.37459e+06	2.01158e+06	3.13533e+06	3.10968e+06	7.96783e+06	4.37954e+06	4.57737e+06	4.38095e+06
402pos		Cer(d38:3)+H	Cer(d38:3)+H	Cer	(d38:3)	(d38:3)				C38 H72 O3 N1	590.551	738.67	0.072208	1.52875	0.294356	0.102758	4.83349e+06	2.41237e+06	6.69559e+06	8.50362e+06	6.61793e+06	2.18842e+06	8.62568e+06	4.91025e+06	5.2995e+06	4.59447e+06	8.40413e+06	5.49231e+06	4.10918e+06	4.12893e+06	6.41136e+06	3.83242e+06	6.26401e+06	3.83091e+06	5.66847e+06	4.4096e+06	1.68098e+07	5.91723e+06	5.65916e+06	4.6623e+06	5.27045e+06	5.99444e+06	5.98459e+06
4031pos		PC(37:4e)+H	PC(37:4e)+H	PC	(37:4e)	(37:4e)				C45 H85 O7 N1 P1	782.606	797.04	0.0451377	1.56738	0.00948544	0.370876	1.92107e+07	1.73888e+07	1.48462e+07	3.04744e+07	1.84637e+07	1.76636e+07	1.06364e+07	3.43644e+07	2.02896e+07	2.44844e+07	1.5614e+07	1.98525e+07	2.23654e+07	1.37495e+07	1.2744e+07	1.69791e+07	1.56977e+07	4.49256e+07	3.00888e+07	2.01197e+07	2.76322e+07	3.42061e+07	3.70399e+07	3.84651e+07	1.41463e+07	1.5311e+07	1.53152e+07
4032pos		PC(37:4e)+H	PC(37:4e)+H	PC	(37:4e)	(37:4e)				C45 H85 O7 N1 P1	782.606	838.86	0.038134	0.256276	0.139284	0.50005	1.72192e+07	5.23833e+07	1.15142e+06	2.21022e+06	2.5623e+06	1.31022e+07	5.68199e+06	4.85127e+06	3.64805e+06	3.19777e+06	493050	4.0363e+07	6.65407e+06	2.93349e+06	449154	3.38073e+06	6.98332e+06	5.77254e+06	3.56211e+06	3.24976e+06	3.91027e+06	4.09305e+06	4.23432e+06	9.12077e+06	2.48789e+06	2.67445e+06	2.53035e+06
4039pos		PC(15:0_22:5)+H	PC(37:5)+H	PC	(15:0_22:5)	(15:0)	(22:5)			C45 H81 O8 N1 P1	794.569	554.299	0.0458716	1.11705	0.615193	0.113775	1.19342e+08	5.10668e+07	1.29751e+08	6.73693e+07	8.62625e+07	1.1418e+08	3.90048e+07	1.44265e+08	9.0926e+07	1.07105e+08	9.58647e+07	4.20508e+07	7.74551e+07	6.0467e+07	4.99167e+07	9.43459e+07	1.18132e+08	1.01882e+08	8.865e+07	1.10239e+08	3.87688e+07	9.39707e+07	9.02464e+07	1.13794e+08	7.89665e+07	7.89929e+07	7.28666e+07
403pos		Cer(d18:0_21:0)+H	Cer(d39:0)+H	Cer	(d18:0_21:0)	(d18:0)	(21:0)			C39 H80 O3 N1	610.613	842.597	0.08282	1.03194	0.872529	0.0576059	5.12899e+06	2.26439e+06	2.30004e+06	3.75948e+06	1.46048e+06	2.20991e+06	2.13739e+06	3.89586e+06	3.01436e+06	4.03556e+06	2.36567e+06	2.45955e+06	2.11708e+06	1.91298e+06	2.47761e+06	1.78233e+06	4.39088e+06	2.94213e+06	4.5805e+06	2.24696e+06	2.48137e+06	3.14244e+06	2.97479e+06	6.05607e+06	1.86442e+06	2.16016e+06	2.16013e+06
404neg		FA(20:4)-H	FA(20:4)-H	FA	(20:4)	(20:4)				O2 H31 C20	303.233	178.184	0.00751159	0.982544	0.924672	0.441346	1.06524e+08	1.62854e+08	9.33608e+07	1.19583e+08	1.3986e+08	1.66907e+08	3.48539e+07	1.53097e+08	1.10816e+08	8.9438e+07	7.70098e+07	8.31321e+07	1.58208e+08	6.529e+07	3.74873e+07	1.06941e+08	1.16949e+08	1.51864e+08	1.12204e+08	1.0472e+08	4.79972e+07	1.09819e+08	1.2024e+08	1.77778e+08	9.00219e+07	8.88553e+07	9.0021e+07
4059pos		PC(37:5e)+H	PC(37:5e)+H	PC	(37:5e)	(37:5e)				C45 H83 O7 N1 P1	780.59	631.671	0.0391812	1.10489	0.719595	0.108533	1.59083e+07	2.26035e+07	1.72704e+07	1.58995e+07	1.86839e+07	1.29702e+07	6.77181e+06	2.95315e+07	3.39828e+07	1.91279e+07	3.54437e+07	1.89907e+07	1.45591e+07	1.25389e+07	1.16227e+07	1.93535e+07	2.74821e+07	4.13737e+07	4.71844e+07	1.80473e+07	1.78877e+07	1.74043e+07	3.34426e+07	3.94328e+07	1.66867e+07	1.79302e+07	1.68652e+07
4060pos		PC(37:5e)+H	PC(37:5e)+H	PC	(37:5e)	(37:5e)				C45 H83 O7 N1 P1	780.59	687.601	0.0518076	1.94141	0.0484438	0.689694	8.17385e+07	4.42173e+07	4.4176e+07	5.41264e+07	6.16215e+07	4.50708e+07	1.89835e+07	6.4646e+07	1.03534e+08	4.56436e+07	3.30081e+07	3.46069e+07	7.7337e+07	1.13713e+08	4.56235e+07	8.93986e+07	3.57883e+07	7.58344e+07	5.99259e+07	3.15485e+08	1.92865e+08	7.193e+07	8.25056e+07	9.74584e+07	3.97866e+07	4.34744e+07	4.36843e+07
4076pos		PC(15:0_22:6)+H	PC(37:6)+H	PC	(15:0_22:6)	(15:0)	(22:6)			C45 H79 O8 N1 P1	792.554	513.9	0.00423797	1.01885	0.936764	0.664721	4.81152e+08	3.51442e+08	5.32479e+08	3.64922e+08	4.71737e+08	6.85144e+08	9.74349e+07	7.92107e+08	5.88334e+08	4.41535e+08	4.18876e+08	2.36768e+08	3.27373e+08	3.56404e+08	1.24302e+08	5.39105e+08	4.71789e+08	5.13957e+08	5.68044e+08	5.39917e+08	1.8602e+08	4.33289e+08	5.53849e+08	7.40193e+08	3.86738e+08	3.89612e+08	3.86796e+08
407pos		Cer(d39:4)+H	Cer(d39:4)+H	Cer	(d39:4)	(d39:4)				C39 H72 O3 N1	602.551	745.87	0.109392	1.03118	0.654171	0.362548	1.2602e+08	7.67707e+07	9.51017e+07	8.60202e+07	9.00145e+07	6.56011e+07	9.5172e+07	1.02856e+08	8.71517e+07	8.08196e+07	8.6201e+07	8.8829e+07	8.56187e+07	9.11944e+07	8.54793e+07	8.92268e+07	1.3664e+08	8.17571e+07	8.99615e+07	7.75237e+07	8.11018e+07	7.98158e+07	7.61895e+07	9.00096e+07	7.02016e+07	8.55442e+07	8.53045e+07
4082pos		PC(37:6)+H	PC(37:6)+H	PC	(37:6)	(37:6)				C45 H79 O8 N1 P1	792.554	565.44	0.113161	1.22087	0.184963	0.0967048	3.38032e+07	3.51404e+07	3.96655e+07	4.39721e+07	4.05132e+07	2.25628e+07	2.50093e+07	3.69258e+07	4.65644e+07	3.40216e+07	3.16074e+07	2.60193e+07	3.58315e+07	4.20054e+07	2.58896e+07	4.28733e+07	3.21408e+07	6.01872e+07	4.39031e+07	6.43904e+07	3.29182e+07	3.86477e+07	4.2301e+07	4.41567e+07	3.598e+07	4.09686e+07	3.27553e+07
4104pos		PC(28:0_10:0)+H	PC(38:0)+H	PC	(28:0_10:0)	(28:0)	(10:0)			C46 H93 O8 N1 P1	818.663	821.258	0.103192	1.03127	0.87955	0.130557	2.7213e+07	1.8011e+07	1.95463e+07	2.47048e+07	1.8351e+07	1.98585e+07	2.66856e+07	1.59424e+07	1.91277e+07	2.91488e+07	1.48591e+07	1.68193e+07	1.96427e+07	1.21298e+07	2.56319e+07	1.85768e+07	1.721e+07	1.66433e+07	1.68262e+07	1.48042e+07	3.755e+07	1.84564e+07	1.45021e+07	1.87361e+07	1.21826e+07	1.48902e+07	1.30667e+07
4107pos		PC(38:0e)+H	PC(38:0e)+H	PC	(38:0e)	(38:0e)				C46 H95 O7 N1 P1	804.684	863.646	0.0264888	2.10096	0.000129673	0.601759	5.43806e+06	1.24243e+07	2.51689e+06	2.12051e+07	1.24756e+07	1.32602e+07	9.02374e+06	3.49047e+07	1.54824e+07	2.40571e+07	2.01804e+06	1.59031e+07	3.82335e+07	1.43058e+07	3.87858e+06	2.18232e+07	5.0511e+06	3.90475e+07	2.08332e+07	1.69893e+07	2.90687e+07	2.67264e+07	3.99169e+07	3.91638e+07	1.37798e+07	1.44236e+07	1.44401e+07
410pos		Cer(d18:0_22:0)+H	Cer(d40:0)+H	Cer	(d18:0_22:0)	(d18:0)	(22:0)			C40 H82 O3 N1	624.629	809.46	0.0685676	1.27072	0.25519	0.0389252	5.20673e+06	3.40574e+06	5.17607e+06	1.12472e+07	4.55595e+06	6.07627e+06	8.35411e+06	6.41041e+06	4.89255e+06	4.42798e+06	7.30381e+06	5.51776e+06	5.46976e+06	4.03157e+06	4.38091e+06	5.93327e+06	7.82976e+06	1.15678e+07	9.03901e+06	5.4367e+06	6.77966e+06	5.50437e+06	6.23076e+06	8.28552e+06	5.28981e+06	5.76419e+06	6.06603e+06
4111pos		PC(24:0_14:1)+H	PC(38:1)+H	PC	(24:0_14:1)	(24:0)	(14:1)			C46 H91 O8 N1 P1	816.648	761.639	0.073719	1.47379	0.0651569	1.37975	7.52294e+08	6.60351e+08	6.60399e+08	8.1942e+08	6.53484e+08	6.95709e+08	6.42386e+08	8.56742e+08	6.74148e+08	6.03533e+08	5.81814e+08	5.90714e+08	6.14524e+08	5.88408e+08	6.55038e+08	6.44095e+08	8.24987e+08	1.49547e+09	6.14191e+08	6.10239e+08	5.50715e+08	9.35624e+08	1.17382e+09	1.17679e+09	5.42455e+08	6.28779e+08	5.85251e+08
4120pos		PC(38:1e)+H	PC(38:1e)+H	PC	(38:1e)	(38:1e)				C46 H93 O7 N1 P1	802.668	754.32	0.117336	2.39956	0.00207006	0.674693	4.6574e+06	1.27738e+07	1.67318e+06	2.71251e+07	1.93051e+07	1.57965e+07	2.22271e+07	4.47246e+07	4.00116e+07	1.67658e+07	2.28265e+06	1.61043e+07	4.34031e+07	1.71277e+07	2.12626e+06	2.02095e+07	4.31855e+06	5.14745e+07	1.65154e+07	4.25125e+07	1.54786e+07	3.12218e+07	4.70812e+07	6.14555e+07	1.50892e+07	1.88647e+07	1.60829e+07
412pos		Cer(d18:0_22:0)+H	Cer(d40:0)+H	Cer	(d18:0_22:0)	(d18:0)	(22:0)			C40 H82 O3 N1	624.629	881.055	0.026522	1.18054	0.238964	0.01766	5.35596e+06	4.48646e+06	2.58753e+06	4.59101e+06	3.73024e+06	4.80285e+06	3.41893e+06	7.73242e+06	7.51173e+06	6.61102e+06	3.84163e+06	4.51723e+06	5.67885e+06	3.56698e+06	5.09769e+06	4.13617e+06	4.01911e+06	6.30361e+06	6.15226e+06	4.10777e+06	5.09536e+06	7.10773e+06	3.85239e+06	8.38065e+06	3.81234e+06	4.00777e+06	3.8526e+06
4140pos		PC(38:3)+H	PC(38:3)+H	PC	(38:3)	(38:3)				C46 H87 O8 N1 P1	812.616	664.519	0.0530125	1.09106	0.15171	1.34422	3.2232e+09	1.4231e+09	2.92495e+09	2.40339e+09	1.90256e+09	2.07428e+09	2.11894e+09	1.83642e+09	2.14804e+09	1.80632e+09	2.61566e+09	1.83159e+09	2.11276e+09	1.87196e+09	2.01636e+09	1.98008e+09	3.61514e+09	1.87209e+09	1.95007e+09	2.55507e+09	2.04403e+09	2.19491e+09	1.92828e+09	2.11168e+09	1.83813e+09	2.03671e+09	1.89699e+09
4141pos		PC(38:3)+H	PC(38:3)+H	PC	(38:3)	(38:3)				C46 H87 O8 N1 P1	812.616	678.412	0.0992823	1.29532	0.035984	0.640965	4.86269e+08	3.02961e+08	2.76319e+08	4.05367e+08	3.28307e+08	2.5219e+08	1.92469e+08	3.91536e+08	4.35681e+08	3.54885e+08	3.10798e+08	3.46612e+08	3.43307e+08	3.53903e+08	4.78879e+08	3.54916e+08	5.05455e+08	4.8914e+08	4.37466e+08	4.64412e+08	3.64306e+08	5.32127e+08	4.99256e+08	3.48692e+08	3.3442e+08	3.4418e+08	4.00579e+08
4142pos		PC(24:0_14:3)+H	PC(38:3)+H	PC	(24:0_14:3)	(24:0)	(14:3)			C46 H87 O8 N1 P1	812.616	722.312	0.103124	0.786308	0.426912	0.499188	6.83634e+07	6.6975e+07	3.60327e+07	8.45368e+07	2.99125e+07	6.00687e+07	7.93724e+07	6.24922e+07	4.77387e+07	5.86103e+07	6.82513e+07	4.01615e+07	1.59665e+07	5.03657e+07	6.66822e+07	3.16935e+07	2.31159e+07	1.60252e+07	1.87429e+07	6.71519e+07	2.89319e+07	6.33391e+07	2.90637e+07	7.41251e+07	4.44835e+07	4.81998e+07	3.91806e+07
4175pos		PC(38:4)+H	PC(38:4)+H	PC	(24:1_14:3)	(24:1)	(14:3)			C46 H85 O8 N1 P1	810.601	637.425	0.0257044	1.20771	0.0528549	1.07221	1.83099e+10	1.71778e+10	1.70226e+10	2.42997e+10	1.59564e+10	1.73057e+10	1.47319e+10	2.17751e+10	2.19687e+10	1.84157e+10	1.8394e+10	1.72602e+10	1.60308e+10	1.98954e+10	1.66e+10	1.73262e+10	1.70067e+10	2.54477e+10	2.30482e+10	1.87683e+10	2.07341e+10	2.46322e+10	2.32182e+10	2.05118e+10	1.64695e+10	1.73238e+10	1.70443e+10
4177pos		PC(27:1_11:3)+H	PC(38:4)+H	PC	(27:1_11:3)	(27:1)	(11:3)			C46 H85 O8 N1 P1	810.601	683.097	0.643495	0.831385	0.46015	1.10163	3.00937e+08	2.92537e+08	6.09256e+08	1.89908e+08	1.96462e+08	3.97403e+08	6.93483e+07	2.25944e+08	1.73677e+08	5.34321e+08	3.06113e+08	1.6604e+08	1.80629e+08	2.1427e+08	8.09986e+07	2.87329e+08	1.35528e+08	1.54507e+08	3.06081e+08	2.6024e+08	2.9776e+08	4.38602e+08	2.76239e+08	2.66312e+08	1.02935e+08	4.67494e+08	2.79503e+08
419neg		FA(20:5)-H	FA(20:5)-H	FA	(20:5)	(20:5)				O2 H29 C20	301.217	87.36	0.0105149	1.69681	0.348676	1.06358	9.29795e+06	1.2896e+07	2.29232e+06	1.56402e+07	7.52565e+06	5.13986e+06	2.75283e+07	1.13621e+07	1.97532e+07	2.57298e+07	7.78114e+06	7.63419e+06	4.51346e+06	1.61331e+07	1.71107e+07	7.90781e+06	4.72217e+06	1.68954e+07	8.28957e+06	1.49839e+07	5.43474e+07	1.67912e+07	1.01413e+07	6.64341e+06	1.46629e+07	1.46653e+07	1.49328e+07
4202pos		PC(38:4e)+Na	PC(38:4e)+Na	PC	(38:4e)	(38:4e)				C46 H86 O7 N1 P1 Na1	818.603	455.28	0.069662	0.845039	0.841812	0.438212	1.22302e+08	1.75932e+07	9.40613e+07	9.10854e+07	2.15812e+07	6.45097e+07	2.71023e+08	6.33349e+06	1.41574e+06	2.02568e+08	1.41576e+08	2.32887e+07	2.57214e+06	1.35278e+08	1.7942e+08	1.16032e+08	1.26686e+08	653220	6.49699e+07	1.06189e+07	2.52308e+08	6.48842e+07	6.62626e+06	4.43819e+07	2.25153e+07	1.98755e+07	2.24503e+07
4204pos		PC(20:1e_18:3)+H	PC(38:4e)+H	PC	(20:1e_18:3)	(20:1e)	(18:3)			C46 H87 O7 N1 P1	796.621	670.2	0.0708519	1.32901	0.116797	0.607269	2.06871e+08	2.34952e+08	1.93585e+08	2.75916e+08	3.49543e+08	2.82965e+08	7.26485e+07	4.37316e+08	3.36144e+08	2.71093e+08	2.04566e+08	2.09653e+08	2.39481e+08	2.34409e+08	1.23494e+08	3.48531e+08	2.22153e+08	4.52822e+08	3.60469e+08	2.87541e+08	2.30197e+08	3.88576e+08	5.22447e+08	4.51305e+08	1.95695e+08	2.25153e+08	2.07341e+08
420neg		FA(20:5)-H	FA(20:5)-H	FA	(20:5)	(20:5)				O2 H29 C20	301.217	139.68	0.0156147	0.297811	0.0306928	0.767931	2.92663e+06	4.86966e+06	2.45693e+06	2.35378e+06	7.5401e+06	1.10284e+07	1.05273e+06	2.55678e+06	2.15589e+06	3.09874e+06	2.41313e+06	2.53851e+06	1.86364e+06	1.08004e+06	783093	1.69046e+06	2.00043e+06	1.90848e+06	2.10107e+06	1.97829e+06	523738	1.27867e+06	1.15339e+06	3.72517e+06	1.98891e+06	2.04322e+06	1.98896e+06
420pos		Cer(d18:1_22:0)+H	Cer(d40:1)+H	Cer	(d18:1_22:0)	(d18:1)	(22:0)			C40 H80 O3 N1	622.613	779.7	0.0720939	1.10556	0.628938	0.0229887	1.20095e+07	1.65221e+06	4.14929e+06	1.25134e+07	3.73942e+06	5.06102e+06	5.44234e+06	7.54204e+06	7.14015e+06	7.55444e+06	8.33332e+06	4.43106e+06	4.85994e+06	3.90135e+06	5.30195e+06	3.79221e+06	8.52542e+06	6.58136e+06	6.67704e+06	5.39869e+06	4.58653e+06	4.4454e+06	4.17318e+06	1.07073e+07	3.6175e+06	4.11071e+06	4.10975e+06
421pos		Cer(d18:1_22:0)+H	Cer(d40:1)+H	Cer	(d18:1_22:0)	(d18:1)	(22:0)			C40 H80 O3 N1	622.613	803.232	0.069972	1.17928	0.283344	0.0267876	3.44604e+07	2.38983e+07	2.0293e+07	3.16632e+07	2.19481e+07	2.32354e+07	2.51161e+07	3.97032e+07	3.01618e+07	2.40091e+07	1.94988e+07	1.96301e+07	2.41975e+07	1.91215e+07	2.0209e+07	1.92816e+07	2.96811e+07	3.83483e+07	3.39083e+07	1.79176e+07	2.07734e+07	2.58712e+07	2.40227e+07	5.07126e+07	1.69671e+07	1.80683e+07	1.95039e+07
422pos		Cer(d18:1_22:0)+H	Cer(d40:1)+H	Cer	(d18:1_22:0)	(d18:1)	(22:0)			C40 H80 O3 N1	622.613	850.889	0.0338319	1.25008	0.115198	0.352995	6.86748e+08	3.74756e+08	4.02829e+08	7.78542e+08	3.79325e+08	3.84743e+08	3.77101e+08	7.2341e+08	7.61469e+08	6.59763e+08	3.92623e+08	5.582e+08	4.96136e+08	3.93676e+08	3.98732e+08	3.97441e+08	6.4827e+08	7.00073e+08	7.55046e+08	3.87409e+08	6.23673e+08	6.93565e+08	6.53198e+08	9.86222e+08	3.84825e+08	4.09462e+08	3.88292e+08
4231pos		PC(26:1_12:4)+H	PC(38:5)+H	PC	(26:1_12:4)	(26:1)	(12:4)			C46 H83 O8 N1 P1	808.585	490.62	0.0235687	0.761054	0.202164	0.425347	1.43404e+07	1.52471e+07	1.69568e+07	2.02046e+07	3.38181e+07	3.03874e+07	1.15323e+07	2.35611e+07	2.55791e+07	1.99354e+07	2.17505e+07	1.39205e+07	9.91746e+06	1.58276e+07	1.64668e+07	1.32855e+07	2.49483e+07	2.49181e+07	2.56342e+07	2.36802e+07	1.59347e+07	1.41959e+07	1.72159e+07	1.27778e+07	1.76651e+07	1.8395e+07	1.76628e+07
4235pos		PC(24:2_14:3)+H	PC(38:5)+H	PC	(24:2_14:3)	(24:2)	(14:3)			C46 H83 O8 N1 P1	808.585	588.48	0.0343605	1.37962	0.0917884	3.58575	5.86733e+09	5.73439e+09	6.25743e+09	6.74261e+09	8.28981e+09	5.92686e+09	1.53996e+09	1.09703e+10	9.60399e+09	6.82761e+09	4.47811e+09	5.88711e+09	5.86996e+09	6.24969e+09	2.67675e+09	8.08828e+09	4.93519e+09	1.31305e+10	1.03325e+10	1.13815e+10	6.31321e+09	1.07133e+10	1.23241e+10	1.02803e+10	6.1629e+09	6.57907e+09	6.49652e+09
423neg		FA(22:5)-H	FA(22:5)-H	FA	(22:5)	(22:5)				O2 H33 C22	329.249	96.65	0.0139966	1.1105	0.671906	0.281079	1.85158e+06	8.53419e+06	2.16889e+06	4.70252e+06	3.83857e+06	6.37912e+06	792251	8.18901e+06	6.35775e+06	3.58991e+06	591837	3.13885e+06	7.07218e+06	3.06039e+06	2.90624e+06	4.37258e+06	1.84115e+06	8.91258e+06	6.84718e+06	6.89927e+06	3.69656e+06	2.5059e+06	5.52372e+06	8.03015e+06	3.74189e+06	3.83398e+06	3.83421e+06
424neg		FA(22:5)-H	FA(22:5)-H	FA	(22:5)	(22:5)				O2 H33 C22	329.249	174.78	0.00182461	0.574742	0.054839	1.04613	2.1324e+07	2.34512e+07	2.00602e+07	8.06684e+06	2.25306e+07	3.24104e+07	7.14997e+06	2.27283e+07	1.51001e+07	1.25584e+07	2.00145e+07	1.44646e+07	1.20668e+07	5.21192e+06	1.55886e+07	7.92822e+06	2.67604e+07	1.31431e+07	1.58094e+07	9.20906e+06	4.94605e+06	7.43384e+06	9.35486e+06	1.7502e+07	1.08444e+07	1.08444e+07	1.08101e+07
4254pos		PC(38:5)+H	PC(38:5)+H	PC	(38:5)	(38:5)				C46 H83 O8 N1 P1	808.585	1300.32	0.0370977	3.46741	0.0952657	0.902617	442694	1.15933e+06	6.27836e+07	3.54836e+06	3.10105e+06	6.88226e+07	5.78688e+06	2.54102e+08	1.14566e+08	1.02243e+08	3.69241e+06	362420	214043	1.01473e+08	2.19869e+06	237541	3.4751e+07	2.36737e+07	1.55176e+07	1.37949e+08	7.74462e+07	1.45154e+08	1.62397e+08	1.11715e+08	4.21774e+07	4.52271e+07	4.47182e+07
425neg		FA(22:5)-H	FA(22:5)-H	FA	(22:5)	(22:5)				O2 H33 C22	329.249	204.698	0.00741771	0.670022	0.270457	1.03656	1.51775e+07	7.22866e+07	1.16346e+07	1.68923e+07	2.36298e+07	2.77356e+07	3.93082e+06	3.28326e+07	1.96577e+07	1.47177e+07	7.17881e+06	2.18774e+07	1.69003e+07	8.73315e+06	6.42944e+06	1.20067e+07	1.00054e+07	3.80211e+07	4.33821e+07	1.78266e+07	1.41586e+07	1.26672e+07	2.18562e+07	2.91137e+07	1.53681e+07	1.55312e+07	1.53111e+07
4260pos		PC(18:1e_20:4)+H	PC(38:5e)+H	PC	(18:1e_20:4)	(18:1e)	(20:4)			C46 H85 O7 N1 P1	794.606	600.364	0.0372047	1.08989	0.610653	0.827528	7.76153e+08	7.01631e+08	7.86761e+08	7.44526e+08	1.03798e+09	7.7829e+08	5.17155e+08	1.44699e+09	1.09009e+09	1.18143e+09	9.24771e+08	6.91827e+08	6.71565e+08	7.79859e+08	4.52133e+08	9.22612e+08	8.48436e+08	1.18656e+09	1.37421e+09	8.05751e+08	7.59109e+08	1.12925e+09	1.09012e+09	1.0634e+09	6.89946e+08	7.35877e+08	7.36911e+08
4261pos		PC(20:1e_18:4)+H	PC(38:5e)+H	PC	(20:1e_18:4)	(20:1e)	(18:4)			C46 H85 O7 N1 P1	794.606	644.675	0.332906	1.5101	0.319572	0.483127	8.74569e+07	1.22047e+08	1.09685e+08	1.16761e+08	3.03303e+08	1.11533e+08	1.69937e+08	1.13938e+08	1.70849e+08	7.30012e+07	1.39844e+08	2.38773e+08	8.67828e+07	1.1119e+08	7.32593e+07	1.66358e+08	9.18224e+07	4.87679e+08	2.11116e+08	1.27172e+08	3.33348e+08	9.8346e+07	4.80264e+08	1.06741e+08	1.4315e+08	2.51404e+08	1.50518e+08
4262pos		PC(18:0e_20:5)+H	PC(38:5e)+H	PC	(18:0e_20:5)	(18:0e)	(20:5)			C46 H85 O7 N1 P1	794.606	678.18	0.0439327	1.17972	0.389172	0.101918	3.55608e+08	4.6909e+08	3.54374e+08	3.42538e+08	5.4294e+08	3.46803e+08	1.2154e+08	7.29548e+08	5.30671e+08	4.97513e+08	3.20541e+08	3.88949e+08	3.52553e+08	3.65879e+08	1.9887e+08	5.05071e+08	3.84389e+08	7.61848e+08	7.99716e+08	4.06382e+08	3.68501e+08	6.3549e+08	7.44336e+08	6.12284e+08	3.6017e+08	3.86377e+08	3.91093e+08
4302pos		PC(38:6)+H	PC(38:6)+H	PC	(38:6)	(38:6)				C46 H81 O8 N1 P1	806.569	522.351	0.00519672	1.24152	0.246049	1.59751	6.13812e+09	3.14758e+09	7.24163e+09	4.96995e+09	5.03777e+09	6.04396e+09	2.23922e+09	7.896e+09	6.32429e+09	4.59527e+09	5.062e+09	2.98204e+09	4.88938e+09	3.93884e+09	2.8058e+09	5.85204e+09	7.45956e+09	6.46426e+09	6.09383e+09	5.8508e+09	2.7416e+09	6.58598e+09	6.06161e+09	7.09462e+09	4.69431e+09	4.69424e+09	4.65215e+09
4303pos		PC(38:6)+Na	PC(38:6)+Na	PC	(38:6)	(38:6)				C46 H80 O8 N1 P1 Na1	828.551	522.351	0.0054616	1.24028	0.0945436	0.403942	1.60023e+08	1.45504e+08	1.26889e+08	2.52007e+08	2.29595e+08	2.02552e+08	1.97028e+08	2.51263e+08	2.44815e+08	2.20481e+08	2.05256e+08	1.29113e+08	1.88567e+08	2.23728e+08	1.37357e+08	2.18693e+08	2.40991e+08	2.80997e+08	2.52961e+08	2.43757e+08	2.02554e+08	2.66509e+08	2.73892e+08	2.29963e+08	2.4061e+08	2.42891e+08	2.4291e+08
4304pos		PC(38:6)+H	PC(38:6)+H	PC	(38:6)	(38:6)				C46 H81 O8 N1 P1	806.569	551.569	0.00293607	1.14243	0.258441	3.54105	3.31369e+10	2.75563e+10	3.88665e+10	3.49448e+10	3.67676e+10	2.66585e+10	1.99835e+10	3.99993e+10	4.56681e+10	3.18043e+10	3.83139e+10	2.56444e+10	3.13354e+10	3.65852e+10	2.19969e+10	4.47329e+10	3.63326e+10	4.12042e+10	2.47773e+10	4.11374e+10	2.56814e+10	3.51097e+10	2.45493e+10	4.57992e+10	3.55827e+10	3.55828e+10	3.5764e+10
4310pos		PC(18:1_20:5)+H	PC(38:6)+H	PC	(18:1_20:5)	(18:1)	(20:5)			C46 H81 O8 N1 P1	806.569	674.3	0.0444478	1.032	0.833246	0.669827	1.04382e+09	2.09131e+08	8.15659e+08	2.97649e+08	3.31903e+08	2.00055e+08	2.27965e+08	3.11785e+08	3.03737e+08	2.85132e+08	6.86637e+08	2.81754e+08	3.24987e+08	2.87372e+08	3.59132e+08	3.08284e+08	8.39148e+08	3.22828e+08	2.89797e+08	3.23401e+08	1.15031e+08	3.14705e+08	2.59569e+08	4.53434e+08	2.71383e+08	2.92165e+08	2.94459e+08
432neg		FA(22:6)-H	FA(22:6)-H	FA	(22:6)	(22:6)				O2 H31 C22	327.233	80.393	0.0171294	0.966314	0.789838	0.167101	4.0974e+07	3.80508e+07	4.13034e+07	3.45605e+07	3.75839e+07	4.11265e+07	8.58574e+06	4.16318e+07	4.49913e+07	2.52944e+07	2.61047e+07	3.02889e+07	4.00142e+07	2.31744e+07	1.55281e+07	2.74589e+07	4.26574e+07	3.73561e+07	3.57105e+07	3.58389e+07	1.79077e+07	3.03758e+07	3.37608e+07	4.60595e+07	2.98129e+07	3.05374e+07	2.95453e+07
4338pos		PC(38:6)+H	PC(38:6)+H	PC	(38:6)	(38:6)				C46 H81 O8 N1 P1	806.569	1321.68	0.164478	1.6778	0.420456	0.570562	1.55898e+06	1.55357e+07	2.41881e+08	3.46084e+07	2.30143e+08	5.32891e+08	4.5239e+06	5.89329e+08	1.23197e+08	1.05081e+08	1.38786e+08	511310	506306	2.52658e+08	6.84647e+06	587266	3.34879e+07	5.40709e+07	6.95745e+07	3.95576e+08	1.32527e+08	3.35786e+08	4.87954e+08	3.61497e+08	1.41209e+08	1.04826e+08	1.4215e+08
4358pos		PC(16:1e_22:5)+H	PC(38:6e)+H	PC	(16:1e_22:5)	(16:1e)	(22:5)			C46 H83 O7 N1 P1	792.59	593.713	0.0270371	0.996034	0.979783	2.83851	3.68339e+09	2.84724e+09	3.64048e+09	3.97356e+09	5.15539e+09	4.29798e+09	1.43394e+09	5.31374e+09	5.27084e+09	3.91785e+09	3.72205e+09	3.38997e+09	3.18934e+09	4.58677e+09	1.76038e+09	5.28638e+09	3.58736e+09	4.85129e+09	5.52863e+09	3.5867e+09	2.35103e+09	4.17465e+09	5.15731e+09	5.57164e+09	3.37189e+09	3.53491e+09	3.53486e+09
4388pos		PC(38:7)+H	PC(38:7)+H	PC	(38:7)	(38:7)				C46 H79 O8 N1 P1	804.554	510.811	0.0042162	1.06154	0.765659	0.37931	2.78038e+08	2.18077e+08	3.17339e+08	2.76023e+08	3.11066e+08	3.95726e+08	8.37748e+07	4.42129e+08	3.95854e+08	2.37967e+08	2.99186e+08	1.57013e+08	2.41771e+08	2.55486e+08	8.84874e+07	3.39056e+08	3.09233e+08	3.26199e+08	4.35271e+08	3.37726e+08	1.66873e+08	3.30597e+08	3.55555e+08	4.12618e+08	2.44474e+08	2.46156e+08	2.46362e+08
438neg		FA(22:6)-H	FA(22:6)-H	FA	(22:6)	(22:6)				O2 H31 C22	327.233	162.667	0.0149648	0.790514	0.262067	1.75307	2.81067e+08	3.29843e+08	2.47537e+08	1.67322e+08	2.20272e+08	2.9777e+08	9.46466e+07	2.717e+08	2.18033e+08	1.39761e+08	2.09449e+08	1.41809e+08	1.87577e+08	8.96605e+07	1.22849e+08	1.3605e+08	2.19113e+08	2.03686e+08	2.28736e+08	1.58918e+08	1.13275e+08	1.18523e+08	1.78906e+08	2.96339e+08	1.68412e+08	1.64088e+08	1.68419e+08
438pos		Cer(d18:1_22:1)+H	Cer(d40:2)+H	Cer	(d18:1_22:1)	(d18:1)	(22:1)			C40 H78 O3 N1	620.598	1090.2	0.0118693	1.97439	0.169959	0.275416	1.48163e+06	4.85574e+06	738326	5.89109e+07	1.03081e+07	1.78087e+07	1.99955e+07	1.29806e+07	1.27608e+07	1.32291e+07	3.02915e+06	4.32003e+06	2.4247e+07	2.68733e+07	1.79895e+06	1.43088e+07	2.68189e+06	1.34486e+07	6.06891e+06	2.28445e+07	4.5057e+07	8.07326e+06	7.92529e+06	2.54932e+07	9.58482e+06	9.58152e+06	9.38752e+06
4391pos		PC(38:7)+H	PC(38:7)+H	PC	(38:7)	(38:7)				C46 H79 O8 N1 P1	804.554	608.957	0.0391262	3.92492	0.285948	0.590388	7.03682e+07	1.30896e+07	7.27998e+07	2.50447e+07	1.54017e+07	1.8697e+07	1.45855e+07	2.92868e+08	2.3884e+07	2.18267e+07	5.24054e+07	1.93673e+07	2.80754e+07	2.47621e+07	2.47106e+07	2.23291e+07	6.34583e+07	2.5816e+07	1.58231e+07	2.37147e+07	8.39396e+06	2.8281e+07	2.55623e+07	3.2072e+07	2.08617e+07	2.23413e+07	2.23436e+07
43pos		AcCa(18:2)+H	AcCa(18:2)+H	AcCa	(18:2)	(18:2)				C25 H46 O4 N1	424.342	97.6273	0.010342	3.52872	0.119257	1.10678	1.71073e+08	1.49817e+07	4.83324e+08	8.75482e+07	5.40822e+07	1.18814e+08	6.4789e+07	1.0776e+08	1.39798e+08	1.93748e+07	7.50975e+07	1.46351e+07	5.13668e+07	5.55937e+07	3.48436e+07	9.64672e+07	1.27562e+08	4.74397e+08	6.71294e+07	2.42542e+08	5.10076e+07	2.67997e+08	6.73345e+07	1.89748e+08	1.13375e+08	1.15417e+08	1.13372e+08
4418pos		PC(16:2e_22:5)+H	PC(38:7e)+H	PC	(16:2e_22:5)	(16:2e)	(22:5)			C46 H81 O7 N1 P1	790.575	575.787	0.0162954	1.04614	0.802497	2.20343	5.49658e+09	5.74449e+09	6.10246e+09	5.51776e+09	5.4061e+09	3.04123e+09	2.82794e+09	6.03785e+09	6.85265e+09	4.75708e+09	7.54912e+09	5.05757e+09	4.66465e+09	5.82797e+09	2.99412e+09	5.78763e+09	7.50819e+09	7.40021e+09	9.4694e+09	5.34299e+09	4.15279e+09	6.01674e+09	6.7483e+09	5.6688e+09	5.3863e+09	5.54722e+09	5.40196e+09
443pos		Cer(d18:2_22:1)+H	Cer(d40:3)+H	Cer	(d18:2_22:1)	(d18:2)	(22:1)			C40 H76 O3 N1	618.582	806.083	0.0823041	1.51566	0.0305125	0.167272	9.01505e+06	6.12335e+06	8.13378e+06	7.85867e+06	7.034e+06	6.00615e+06	8.90348e+06	8.45947e+06	9.10268e+06	5.75628e+06	5.90756e+06	5.92134e+06	6.68518e+06	6.05852e+06	6.86946e+06	6.78248e+06	8.38704e+06	1.26323e+07	1.08464e+07	5.79186e+06	1.44956e+07	9.38748e+06	1.1524e+07	1.35025e+07	4.89993e+06	5.77507e+06	5.29709e+06
4450pos		PC(38:8e)+H	PC(38:8e)+H	PC	(38:8e)	(38:8e)				C46 H79 O7 N1 P1	788.559	534.305	0.0118087	1.07448	0.756996	0.142853	4.26362e+07	3.29982e+07	5.02364e+07	3.42484e+07	4.01675e+07	4.34535e+07	9.85252e+06	5.72794e+07	4.85717e+07	2.83601e+07	5.28191e+07	2.08364e+07	2.71255e+07	3.62999e+07	1.31405e+07	4.00458e+07	4.95224e+07	5.24048e+07	6.90986e+07	3.46008e+07	2.02767e+07	4.4751e+07	5.05734e+07	5.30323e+07	3.44505e+07	3.37551e+07	3.37555e+07
4458pos		PC(38:9)+H	PC(38:9)+H	PC	(38:9)	(38:9)				C46 H75 O8 N1 P1	800.522	469.205	0.0159878	0.966501	0.897649	0.253704	1.22499e+07	2.26499e+07	1.65236e+07	2.35237e+07	3.11658e+07	4.28261e+07	3.75127e+06	5.05696e+07	3.61353e+07	2.14404e+07	1.5835e+07	1.2733e+07	1.6277e+07	2.57613e+07	2.72548e+06	3.45331e+07	2.06214e+07	3.17186e+07	4.88019e+07	3.04038e+07	1.71417e+07	2.63708e+07	3.15224e+07	4.94293e+07	2.1131e+07	2.17268e+07	2.17276e+07
446pos		Cer(d17:1_23:3)+H	Cer(d40:4)+H	Cer	(d17:1_23:3)	(d17:1)	(23:3)			C40 H74 O3 N1	616.566	796.554	0.0991193	1.27034	0.078341	0.428139	7.08663e+08	4.0389e+08	3.86498e+08	6.22431e+08	4.18604e+08	3.66015e+08	4.40709e+08	5.4882e+08	5.8112e+08	4.52414e+08	3.89224e+08	3.73741e+08	3.87268e+08	3.98264e+08	3.96513e+08	3.81525e+08	6.38881e+08	7.60907e+08	5.25228e+08	3.99241e+08	4.29132e+08	5.58873e+08	5.41534e+08	8.6467e+08	3.70739e+08	4.44352e+08	4.4072e+08
4473pos		PC(17:1_22:3)+H	PC(39:4)+H	PC	(17:1_22:3)	(17:1)	(22:3)			C47 H87 O8 N1 P1	824.616	671.191	0.0428355	1.22036	0.17887	0.576663	1.26953e+09	2.7036e+08	1.07443e+09	6.10679e+08	6.31236e+08	3.56648e+08	5.16832e+08	7.64525e+08	6.1021e+08	5.22142e+08	1.07083e+09	5.35099e+08	5.86255e+08	5.68002e+08	5.86723e+08	5.14242e+08	1.36775e+09	5.34973e+08	5.54892e+08	6.32753e+08	4.28898e+08	6.56633e+08	5.31599e+08	7.29371e+08	4.85704e+08	5.27809e+08	5.16901e+08
4482pos		PC(39:4e)+H	PC(39:4e)+H	PC	(39:4e)	(39:4e)				C47 H89 O7 N1 P1	810.637	807.3	0.0297165	0.546319	0.477868	0.394526	3.91999e+06	1.11795e+08	2.30199e+06	2.02432e+07	9.61601e+06	8.91018e+06	5.19036e+06	1.31241e+07	9.2311e+06	1.29087e+07	2.25675e+06	9.62734e+06	1.27986e+07	7.02119e+06	2.15469e+06	8.728e+06	3.25336e+06	1.76746e+07	1.2104e+07	9.18265e+06	1.17197e+07	1.92965e+07	1.55083e+07	1.55636e+07	7.12951e+06	7.50926e+06	7.50976e+06
4484pos		PC(17:1_22:4)+H	PC(39:5)+H	PC	(17:1_22:4)	(17:1)	(22:4)			C47 H85 O8 N1 P1	822.601	530.831	0.0180549	0.678729	0.20795	0.208539	8.79278e+06	6.05576e+06	8.3173e+06	6.17673e+06	3.74041e+06	1.10751e+07	751069	1.80053e+06	8.05381e+06	5.22112e+06	6.26526e+06	4.12825e+06	3.95459e+06	8.4306e+06	2.10994e+06	6.21272e+06	8.65272e+06	6.41434e+06	1.04905e+07	1.02731e+07	2.40851e+06	5.2147e+06	7.83918e+06	9.53909e+06	5.56535e+06	5.39631e+06	5.39345e+06
4485pos		PC(39:5)+H	PC(39:5)+H	PC	(39:5)	(39:5)				C47 H85 O8 N1 P1	822.601	536.76	0.0502153	0.994546	0.981804	0.161283	1.62378e+07	1.38753e+07	1.78478e+07	1.51199e+07	1.6804e+07	3.0455e+07	5.81228e+06	3.05066e+07	2.16801e+07	1.65886e+07	1.17417e+07	1.30824e+07	1.22561e+07	1.63414e+07	5.51393e+06	1.50523e+07	1.87752e+07	2.14673e+07	1.92181e+07	2.37357e+07	6.43392e+06	1.72062e+07	2.15533e+07	2.17931e+07	1.54618e+07	1.54697e+07	1.68511e+07
4487pos		PC(27:1_12:4)+H	PC(39:5)+H	PC	(27:1_12:4)	(27:1)	(12:4)			C47 H85 O8 N1 P1	822.601	605.414	0.0474068	1.27198	0.107531	0.302673	2.53796e+08	1.31528e+08	2.91812e+08	1.3814e+08	1.46977e+08	1.37569e+08	1.45667e+08	2.73603e+08	1.6631e+08	1.58896e+08	2.65264e+08	1.34717e+08	1.50726e+08	1.51979e+08	1.41215e+08	1.40857e+08	2.6744e+08	1.78569e+08	1.88483e+08	1.62704e+08	1.26666e+08	1.9229e+08	2.20602e+08	1.9977e+08	1.34695e+08	1.46398e+08	1.46393e+08
4497pos		PC(39:6)+H	PC(39:6)+H	PC	(39:6)	(39:6)				C47 H83 O8 N1 P1	820.585	574.058	0.0187786	1.21324	0.230459	0.20518	2.83258e+08	1.21967e+08	2.83118e+08	1.6021e+08	1.46028e+08	1.19707e+08	1.20089e+08	2.59435e+08	1.89131e+08	1.77013e+08	2.57618e+08	1.10668e+08	1.49536e+08	1.70061e+08	1.09428e+08	1.71016e+08	2.46947e+08	1.56045e+08	1.61271e+08	1.84774e+08	1.08931e+08	1.55175e+08	1.85938e+08	1.96069e+08	1.63808e+08	1.69238e+08	1.6927e+08
4498pos		PC(17:0_22:6)+H	PC(39:6)+H	PC	(17:0_22:6)	(17:0)	(22:6)			C47 H83 O8 N1 P1	820.585	681.193	0.0392034	1.5591	0.0382918	0.515928	4.71487e+07	4.65269e+07	6.04254e+07	6.79972e+07	5.93816e+07	4.11196e+07	8.67564e+06	6.88494e+07	5.88085e+07	3.78285e+07	5.28703e+07	5.23423e+07	6.31065e+07	4.27484e+07	3.67407e+07	6.96236e+07	5.24661e+07	1.11807e+08	4.97043e+07	9.15489e+07	4.08135e+07	6.28843e+07	9.98514e+07	9.38388e+07	3.8805e+07	4.19194e+07	3.99334e+07
449pos		Cer(d40:5)+H	Cer(d40:5)+H	Cer	(d40:5)	(d40:5)				C40 H72 O3 N1	614.551	736.153	0.0995894	1.14043	0.456603	0.201364	4.14605e+08	1.36939e+08	1.56771e+08	3.19241e+08	3.23997e+08	1.65336e+08	1.77279e+08	2.41128e+08	2.18654e+08	1.97066e+08	3.25236e+08	1.88989e+08	1.566e+08	2.02319e+08	1.71305e+08	1.93182e+08	4.10985e+08	3.33587e+08	2.00342e+08	1.93622e+08	2.32802e+08	2.45094e+08	1.73752e+08	2.92403e+08	1.78434e+08	2.14879e+08	2.11219e+08
450pos		Cer(d18:0_23:0)+H	Cer(d41:0)+H	Cer	(d18:0_23:0)	(d18:0)	(23:0)			C41 H84 O3 N1	638.645	897.3	0.0411359	1.12897	0.694264	0.0524267	6.18664e+06	3.98858e+06	2.75961e+06	6.28043e+06	3.22383e+06	4.60719e+06	8.20114e+06	7.09007e+06	8.38758e+06	1.16826e+07	4.134e+06	4.95738e+06	4.99918e+06	5.24644e+06	7.28744e+06	4.67216e+06	4.10446e+06	5.14945e+06	6.20512e+06	5.44973e+06	1.26463e+07	6.31117e+06	2.93932e+06	6.07521e+06	4.65854e+06	5.01645e+06	4.69468e+06
4511pos		PC(39:7)+H	PC(39:7)+H	PC	(39:7)	(39:7)				C47 H81 O8 N1 P1	818.569	525.016	0.0160008	1.05329	0.840873	0.337591	3.18359e+08	1.84587e+08	3.60895e+08	1.96737e+08	2.27725e+08	3.57503e+08	5.15533e+07	3.71533e+08	2.93559e+08	1.69781e+08	2.50947e+08	1.07469e+08	1.79351e+08	1.82838e+08	7.87159e+07	2.38458e+08	3.49657e+08	3.16856e+08	2.98528e+08	2.58805e+08	6.70246e+07	2.04519e+08	2.78009e+08	3.14069e+08	2.03662e+08	2.09412e+08	2.03766e+08
4514pos		PC(17:1_22:6)+H	PC(39:7)+H	PC	(17:1_22:6)	(17:1)	(22:6)			C47 H81 O8 N1 P1	818.569	636.429	0.0227261	1.16481	0.293493	0.264251	1.87823e+08	4.30386e+07	2.01241e+08	8.42655e+07	8.38395e+07	5.48133e+07	8.42706e+07	8.57553e+07	7.75336e+07	1.03983e+08	1.56364e+08	6.03247e+07	7.88805e+07	8.41041e+07	1.05091e+08	9.78114e+07	2.04859e+08	8.88321e+07	6.13768e+07	8.72352e+07	5.81947e+07	7.80098e+07	8.48423e+07	1.00195e+08	8.65583e+07	9.02718e+07	8.71297e+07
4517pos		PC(40:0)+H	PC(40:0)+H	PC	(40:0)	(40:0)				C48 H97 O8 N1 P1	846.695	879.428	0.037291	1.16782	0.747595	0.0815871	1.53252e+07	5.38379e+06	5.62692e+06	1.37275e+07	4.03325e+06	5.74569e+06	2.83887e+07	6.60791e+06	1.22678e+07	1.84315e+07	8.10142e+06	7.36783e+06	5.08226e+06	6.59048e+06	1.88868e+07	7.09652e+06	8.95644e+06	6.74412e+06	6.60932e+06	8.78193e+06	2.59954e+07	7.59612e+06	3.52929e+06	7.71391e+06	7.19355e+06	7.69337e+06	7.24428e+06
4518pos		PC(40:1)+H	PC(40:1)+H	PC	(40:1)	(40:1)				C48 H95 O8 N1 P1	844.679	794.4	0.0544702	1.22793	0.209075	0.019999	8.92911e+06	3.81314e+06	3.6136e+06	9.15326e+06	4.22808e+06	4.0777e+06	6.2841e+06	5.77293e+06	5.79106e+06	7.22676e+06	2.75747e+06	3.21552e+06	3.55504e+06	4.9711e+06	2.88629e+06	3.19704e+06	7.89318e+06	7.12409e+06	4.22004e+06	6.79094e+06	5.05367e+06	6.22954e+06	5.1503e+06	6.75534e+06	3.42991e+06	3.81825e+06	3.57221e+06
4519pos		PC(19:0_21:1)+H	PC(40:1)+H	PC	(19:0_21:1)	(19:0)	(21:1)			C48 H95 O8 N1 P1	844.679	819.9	0.100195	1.18126	0.361248	0.0606553	5.58549e+07	5.73103e+07	5.16364e+07	2.7077e+08	5.07627e+07	3.57408e+07	1.75881e+08	4.75317e+07	4.55923e+07	4.56669e+07	4.12202e+07	5.60332e+07	4.97936e+07	3.79276e+07	6.80072e+07	4.27638e+07	7.43337e+07	7.11975e+07	4.15145e+07	1.05026e+08	9.04007e+07	3.38649e+07	4.62672e+07	4.04029e+07	3.83018e+07	4.63832e+07	4.50524e+07
4531pos		PC(18:4_22:6)+H	PC(40:10)+H	PC	(18:4_22:6)	(18:4)	(22:6)			C48 H77 O8 N1 P1	826.538	493.318	0.00596862	0.811587	0.360863	0.689428	1.14054e+08	7.07926e+07	8.95136e+07	1.00861e+08	1.12543e+08	1.42705e+08	4.32767e+07	8.90838e+07	1.31931e+08	9.43232e+07	1.49575e+08	4.10826e+07	6.18122e+07	9.32094e+07	4.01678e+07	1.33786e+08	1.51256e+08	1.1061e+08	1.5597e+08	7.82588e+07	4.72971e+07	9.36468e+07	9.86372e+07	1.63468e+08	9.76691e+07	9.86849e+07	9.86867e+07
4535pos		PC(40:2)+H	PC(40:2)+H	PC	(40:2)	(40:2)				C48 H93 O8 N1 P1	842.663	771.494	0.0432358	1.29067	0.335785	0.177465	9.84252e+07	3.65629e+07	5.30266e+07	1.02543e+08	4.53837e+07	4.30342e+07	8.15164e+07	7.90566e+07	6.42359e+07	1.34863e+08	5.20501e+07	3.74194e+07	5.80302e+07	4.28287e+07	7.39294e+07	5.10217e+07	9.83907e+07	1.00628e+08	5.08349e+07	8.01325e+07	7.59188e+07	7.3007e+07	6.26389e+07	1.01509e+08	4.98784e+07	5.09461e+07	5.41691e+07
4547pos		PC(40:2e)+H	PC(40:2e)+H	PC	(40:2e)	(40:2e)				C48 H95 O7 N1 P1	828.684	952.56	0.0269936	1.04139	0.888201	0.097012	3.14981e+07	1.84736e+07	2.58482e+07	1.85056e+07	1.93302e+07	1.6593e+07	2.57928e+06	3.68706e+07	3.15063e+07	1.63446e+07	2.62919e+07	2.33123e+07	3.45952e+07	1.72864e+07	6.09149e+06	1.90545e+07	4.53772e+07	2.98749e+07	4.74174e+07	1.84015e+07	9.17457e+06	1.2603e+07	2.42082e+07	2.30772e+07	1.65566e+07	1.73485e+07	1.73626e+07
4548pos		PC(40:3)+Na	PC(40:3)+Na	PC	(40:3)	(40:3)				C48 H90 O8 N1 P1 Na1	862.63	562.773	0.0840711	1.576	0.239046	0.137172	448117	4.56184e+06	2.38922e+06	1.14106e+07	4.62551e+06	3.29624e+06	1.03232e+07	6.7746e+06	6.03863e+06	7.4275e+06	6.85153e+06	4.14165e+06	1.74411e+06	8.17245e+06	5.49012e+06	4.60139e+06	5.97485e+06	8.79862e+06	6.40423e+06	5.3931e+06	1.78852e+07	8.35826e+06	4.43922e+06	7.42139e+06	9.43871e+06	8.371e+06	8.05562e+06
4549pos		PC(18:1_22:2)+H	PC(40:3)+H	PC	(18:1_22:2)	(18:1)	(22:2)			C48 H91 O8 N1 P1	840.648	712.393	0.0698147	1.25215	0.359863	0.220878	2.39133e+08	8.11985e+07	9.46477e+07	7.85667e+07	1.93366e+08	1.12601e+08	1.09389e+08	1.85377e+08	1.17613e+08	1.32051e+08	9.6997e+07	7.76093e+07	9.47203e+07	8.13794e+07	4.17729e+07	7.39912e+07	1.9964e+08	1.76892e+08	1.25362e+08	1.3253e+08	5.8943e+07	2.38177e+08	1.50179e+08	1.65531e+08	7.98798e+07	9.04091e+07	9.03628e+07
4550pos		PC(30:1_10:2)+H	PC(40:3)+H	PC	(30:1_10:2)	(30:1)	(10:2)			C48 H91 O8 N1 P1	840.648	745.08	0.0586128	1.53604	0.0554775	0.684864	1.24252e+08	7.24545e+07	5.90496e+07	9.95836e+07	1.15751e+08	6.72565e+07	4.77094e+07	1.60054e+08	9.97451e+07	7.29532e+07	6.80871e+07	6.44695e+07	1.17652e+08	5.53844e+07	6.38925e+07	6.973e+07	8.37867e+07	1.92215e+08	1.41951e+08	1.47476e+08	6.49608e+07	1.32351e+08	1.54296e+08	1.44581e+08	6.09445e+07	6.6163e+07	6.83849e+07
4554pos		PC(40:3e)+H	PC(40:3e)+H	PC	(40:3e)	(40:3e)				C48 H93 O7 N1 P1	826.668	929.46	0.0490014	1.19963	0.249937	0.0709112	2.28913e+07	1.28142e+07	1.23973e+07	7.42302e+06	1.23014e+07	1.2108e+07	5.19845e+06	2.68977e+07	1.63118e+07	2.03543e+07	1.76219e+07	1.3963e+07	1.98283e+07	1.55419e+07	1.11254e+07	1.47094e+07	1.52475e+07	1.65648e+07	1.92812e+07	8.89338e+06	1.44559e+07	1.37652e+07	1.74405e+07	4.39399e+06	1.62995e+07	1.63392e+07	1.77443e+07
4555pos		PC(30:1_10:3)+H	PC(40:4)+H	PC	(30:1_10:3)	(30:1)	(10:3)			C48 H89 O8 N1 P1	838.632	688.636	0.0579674	1.42792	0.125583	2.49741	2.4803e+09	2.09318e+09	1.91967e+09	2.73417e+09	3.27786e+09	2.38293e+09	6.20022e+08	4.56709e+09	3.62224e+09	2.13105e+09	2.59913e+09	1.9719e+09	2.32059e+09	2.07419e+09	1.66257e+09	2.6605e+09	2.32346e+09	5.18505e+09	4.76821e+09	3.22659e+09	2.13996e+09	4.63548e+09	4.89112e+09	3.44346e+09	1.9923e+09	2.23711e+09	2.13535e+09
4557pos		PC(26:0_14:4)+H	PC(40:4)+H	PC	(26:0_14:4)	(26:0)	(14:4)			C48 H89 O8 N1 P1	838.632	755.76	0.0880294	1.65347	0.0687401	0.528482	8.40869e+07	5.01255e+07	8.28782e+07	5.9913e+07	5.50623e+07	6.97924e+07	5.48075e+07	1.00868e+08	4.46459e+07	6.74437e+07	8.01378e+07	6.71002e+07	4.84603e+07	6.52969e+07	6.54371e+07	7.12629e+07	9.38135e+07	1.71232e+08	4.86732e+07	7.32613e+07	4.9758e+07	1.06382e+08	1.15569e+08	1.08948e+08	6.89715e+07	8.07444e+07	8.06095e+07
4560pos		PC(20:0e_20:4)+H	PC(40:4e)+H	PC	(20:0e_20:4)	(20:0e)	(20:4)			C48 H91 O7 N1 P1	824.653	724.26	0.0707561	1.91132	0.0280078	0.63805	2.4396e+07	2.3576e+07	2.14487e+07	1.50692e+08	5.29725e+07	2.45006e+07	2.38847e+07	6.69048e+07	4.41065e+07	3.49097e+07	3.46245e+07	2.49465e+07	3.54013e+07	2.89644e+07	1.70329e+07	2.49796e+07	2.43197e+07	7.0602e+07	5.93239e+07	5.94476e+07	1.1989e+08	5.74918e+07	7.06383e+07	6.89168e+07	2.45071e+07	2.77551e+07	2.77998e+07
4561pos		PC(20:0e_20:4)+H	PC(40:4e)+H	PC	(20:0e_20:4)	(20:0e)	(20:4)			C48 H91 O7 N1 P1	824.653	730.38	0.0657771	1.58672	0.0864018	0.592756	3.70128e+07	6.82569e+07	1.42907e+07	9.47025e+07	1.11974e+08	6.27836e+07	1.33084e+07	1.57925e+08	9.47487e+07	6.8836e+07	3.10599e+07	6.07033e+07	5.8925e+07	5.78461e+07	2.03548e+07	5.75838e+07	3.60055e+07	1.89839e+08	1.3403e+08	1.17143e+08	6.89209e+07	1.53356e+08	1.7484e+08	1.69398e+08	5.09759e+07	5.47175e+07	5.8159e+07
4564pos		PC(18:0e_22:4)+H	PC(40:4e)+H	PC	(18:0e_22:4)	(18:0e)	(22:4)			C48 H91 O7 N1 P1	824.653	855.06	0.0324967	1.20313	0.309762	0.0997653	4.36979e+07	2.77145e+07	3.1141e+07	3.37947e+07	2.13415e+07	3.11595e+07	3.1104e+07	4.92288e+07	4.1086e+07	4.07297e+07	3.18444e+07	2.94979e+07	3.93552e+07	2.22142e+07	2.48835e+07	2.86795e+07	5.02178e+07	4.45872e+07	6.13862e+07	2.89887e+07	2.7613e+07	4.45736e+07	4.95003e+07	5.65742e+07	2.8984e+07	3.07299e+07	3.06229e+07
4568pos		PC(18:3_22:2)+H	PC(40:5)+H	PC	(18:3_22:2)	(18:3)	(22:2)			C48 H87 O8 N1 P1	836.616	638.217	0.0271474	1.12801	0.187404	1.11451	2.09088e+09	2.1688e+09	2.24005e+09	2.05817e+09	2.3626e+09	2.40445e+09	1.20732e+09	3.24538e+09	2.41662e+09	2.47651e+09	2.25346e+09	2.15513e+09	2.15001e+09	2.15444e+09	1.74192e+09	2.28199e+09	2.24712e+09	2.63103e+09	2.83759e+09	2.16632e+09	2.17632e+09	2.93548e+09	3.11086e+09	2.19784e+09	2.10213e+09	2.20785e+09	2.11313e+09
4569pos		PC(20:0_20:5)+H	PC(40:5)+H	PC	(20:0_20:5)	(20:0)	(20:5)			C48 H87 O8 N1 P1	836.616	679.202	0.0557395	1.3013	0.233716	2.29381	8.24069e+09	8.04152e+09	8.18111e+09	1.00753e+10	1.0148e+10	8.4112e+09	1.41138e+09	1.17063e+10	1.1982e+10	7.45525e+09	6.65613e+09	7.24788e+09	7.23597e+09	8.18145e+09	3.9077e+09	1.10934e+10	6.84947e+09	1.77627e+10	1.6366e+10	1.46641e+10	8.65775e+09	1.21205e+10	1.75626e+10	1.5353e+10	7.30061e+09	8.0535e+09	8.05434e+09
456pos		Cer(d18:1_23:0)+H	Cer(d41:1)+H	Cer	(d18:1_23:0)	(d18:1)	(23:0)			C41 H82 O3 N1	636.629	882.38	0.0264897	1.06174	0.720408	0.262168	2.14436e+08	9.61576e+07	1.00015e+08	1.83777e+08	9.51917e+07	1.00545e+08	1.04552e+08	1.89879e+08	1.83507e+08	1.89196e+08	1.24132e+08	1.53e+08	1.64691e+08	1.07126e+08	1.00085e+08	1.13479e+08	1.89234e+08	1.36934e+08	2.09497e+08	1.17255e+08	1.48521e+08	1.47944e+08	1.07698e+08	2.70049e+08	1.01323e+08	1.06808e+08	1.03653e+08
4570pos		PC(18:0_22:5)+H	PC(40:5)+H	PC	(18:0_22:5)	(18:0)	(22:5)			C48 H87 O8 N1 P1	836.616	706.659	0.180906	0.97461	0.966855	0.483334	1.60253e+08	2.03027e+08	6.10571e+07	1.7985e+08	2.18767e+08	9.59622e+08	7.57223e+07	2.20645e+08	1.89867e+08	1.89036e+08	9.3896e+07	1.1757e+08	1.1925e+08	7.94251e+07	7.7315e+07	1.13696e+08	1.15489e+08	2.23288e+08	1.84006e+08	1.58412e+08	9.99103e+07	9.58519e+08	2.02885e+08	1.92549e+08	1.07376e+08	1.49331e+08	1.50452e+08
4584pos		PC(18:0e_22:5)+H	PC(40:5e)+H	PC	(18:0e_22:5)	(18:0e)	(22:5)			C48 H89 O7 N1 P1	822.637	682.472	0.04832	1.35296	0.162145	0.534355	9.49305e+07	1.15226e+08	6.84809e+07	1.31911e+08	2.08001e+08	1.43491e+08	2.79232e+07	3.06344e+08	1.97224e+08	1.86295e+08	9.85419e+07	1.27945e+08	1.6365e+08	1.62973e+08	4.57606e+07	2.67228e+08	1.06988e+08	2.99018e+08	3.05506e+08	1.76639e+08	1.35873e+08	2.6059e+08	3.04466e+08	2.56272e+08	1.1823e+08	1.2854e+08	1.2887e+08
4613pos		PC(18:4_22:2)+H	PC(40:6)+H	PC	(18:4_22:2)	(18:4)	(22:2)			C48 H85 O8 N1 P1	834.601	567.24	0.320011	1.26432	0.671103	0.426692	2.14252e+08	9.18189e+07	1.94155e+08	1.21102e+08	7.41626e+07	5.17595e+08	1.28609e+08	9.93537e+08	7.76939e+08	1.44865e+08	1.98459e+08	3.36934e+08	8.5656e+07	2.50055e+08	1.00562e+08	2.44552e+08	1.49124e+08	3.64218e+08	4.13797e+08	1.71092e+08	1.04789e+08	1.44682e+08	3.03693e+08	1.24432e+08	2.16756e+08	2.35743e+08	3.78992e+08
4617pos		PC(18:3_22:3)+H	PC(40:6)+H	PC	(18:3_22:3)	(18:3)	(22:3)			C48 H85 O8 N1 P1	834.601	616.98	0.0260596	1.01237	0.809272	8.85093	3.21076e+10	3.13046e+10	3.75157e+10	3.0086e+10	3.34732e+10	3.04805e+10	2.10291e+10	3.44741e+10	3.75208e+10	2.88658e+10	3.66915e+10	3.13474e+10	2.97578e+10	3.35292e+10	2.84904e+10	3.57885e+10	3.70698e+10	3.44072e+10	3.89853e+10	3.39443e+10	3.20284e+10	3.3368e+10	3.28276e+10	3.48441e+10	2.93822e+10	3.09197e+10	3.04536e+10
4619pos		PC(18:1_22:5)+H	PC(40:6)+H	PC	(18:1_22:5)	(18:1)	(22:5)			C48 H85 O8 N1 P1	834.601	673.695	0.334893	0.695767	0.221896	1.14237	1.43707e+08	3.44353e+08	2.32642e+08	1.7168e+08	1.82542e+08	3.77414e+08	5.59611e+07	1.64049e+08	1.84923e+08	1.13822e+08	2.54743e+08	1.02079e+08	1.48936e+08	1.20687e+08	6.92998e+07	2.22363e+08	2.20505e+08	1.93318e+08	2.12923e+08	1.71771e+08	8.05441e+07	1.14061e+08	2.26642e+08	3.10649e+08	1.02478e+08	1.97703e+08	2.00966e+08
461neg		GM3(m38:0)-2H	GM3(m38:0)-2H	GM3	(m38:0)	(m38:0)				C61 H112 O20 N2	596.391	221.027	0.0093947	0.930615	0.721449	0.114509	7.88752e+06	5.38444e+06	7.17446e+06	6.80237e+06	7.0114e+06	8.85832e+06	3.57326e+06	5.1645e+06	6.10651e+06	6.88667e+06	5.4438e+06	2.05215e+06	6.44848e+06	5.24981e+06	6.09257e+06	5.07823e+06	7.5174e+06	3.90619e+06	3.94695e+06	6.54381e+06	6.47297e+06	5.19829e+06	4.58069e+06	7.74195e+06	5.4338e+06	5.33492e+06	5.3663e+06
462neg		GM3(m38:2)-2H	GM3(m38:2)-2H	GM3	(m38:2)	(m38:2)				C61 H108 O20 N2	594.375	153.747	0.186833	1.02869	0.914883	0.40418	2.49784e+07	2.79162e+07	3.23619e+07	1.70927e+07	1.40546e+07	3.91791e+07	1.1815e+07	3.48448e+07	1.46404e+07	1.91915e+07	1.49355e+07	8.22161e+06	2.18005e+07	1.02613e+07	1.65226e+07	2.88177e+07	2.41836e+07	2.1637e+07	2.08917e+07	2.78452e+07	1.38098e+07	1.25074e+07	2.85686e+07	2.46552e+07	2.02419e+07	2.02166e+07	1.43204e+07
4645pos		PC(18:3e_22:3)+H	PC(40:6e)+H	PC	(18:3e_22:3)	(18:3e)	(22:3)			C48 H87 O7 N1 P1	820.621	599.309	0.0253362	0.956981	0.840083	0.419348	1.1518e+08	4.77632e+07	6.06893e+07	6.16422e+07	7.74569e+07	3.69719e+07	3.15029e+07	9.07708e+07	8.59948e+07	5.58702e+07	7.99745e+07	6.02628e+07	4.39103e+07	6.83819e+07	3.14068e+07	9.27151e+07	5.01776e+07	6.95702e+07	1.20956e+08	5.15929e+07	5.49659e+07	5.78083e+07	6.50786e+07	7.12549e+07	5.68031e+07	5.83076e+07	5.97566e+07
4647pos		PC(40:6e)+H	PC(40:6e)+H	PC	(40:6e)	(40:6e)				C48 H87 O7 N1 P1	820.621	660.826	0.0718958	1.29997	0.175127	0.701507	6.64678e+08	5.38811e+08	6.4186e+08	6.00083e+08	7.96435e+08	8.34174e+08	1.44619e+08	1.23442e+09	8.90504e+08	6.60807e+08	6.11759e+08	5.34676e+08	5.79312e+08	7.01475e+08	2.87546e+08	1.05374e+09	6.42613e+08	1.12663e+09	9.84914e+08	6.7664e+08	5.38018e+08	9.30868e+08	1.24539e+09	1.31302e+09	5.3889e+08	6.1174e+08	6.12398e+08
464pos		Cer(d41:1+O)+H-H2O	Cer(d41:1+O)+H-H2O	Cer	(d41:1+O)	(d41:1+O)				C41 H80 O3 N1	634.613	811.993	0.0773679	0.946468	0.807143	0.301674	6.22042e+07	2.53423e+07	2.0824e+07	4.96202e+07	1.96734e+07	2.17431e+07	2.25506e+07	4.76235e+07	2.61566e+07	4.72055e+07	3.62309e+07	2.51734e+07	2.07594e+07	2.04951e+07	2.03508e+07	1.93409e+07	5.46818e+07	2.61888e+07	5.0794e+07	1.99648e+07	2.91793e+07	3.11733e+07	2.484e+07	6.39706e+07	1.90468e+07	2.18446e+07	2.18544e+07
4652pos		PC(18:2e_22:4)+H	PC(40:6e)+H	PC	(18:2e_22:4)	(18:2e)	(22:4)			C48 H87 O7 N1 P1	820.621	890.28	0.051578	0.634901	0.083718	0.105236	852773	1.44241e+06	2.4037e+06	206428	803931	1.10016e+06		873825	435289	1.67497e+06	1.89524e+06	2.61259e+06	1.53977e+06	2.47954e+06	1.91555e+06	2.89812e+06	827956	532158	1.51648e+06	1.00954e+06	886551	794442	1.18293e+06	1.23828e+06	481488	439605	442307
4668pos		PC(20:2_20:5)+Na	PC(40:7)+Na	PC	(20:2_20:5)	(20:2)	(20:5)			C48 H82 O8 N1 P1 Na1	854.567	506.64	0.0128857	1.12413	0.492207	0.11441	2.37679e+07	3.03064e+07	3.186e+07	2.85894e+07	3.59255e+07	4.56676e+07	1.98213e+07	5.17492e+07	4.65611e+07	3.6467e+07	4.45612e+07	2.15305e+07	3.52289e+07	3.77473e+07	1.57057e+07	3.6084e+07	3.76554e+07	4.24567e+07	4.67795e+07	3.48651e+07	1.98155e+07	4.16926e+07	5.2629e+07	3.97835e+07	3.95614e+07	4.0461e+07	4.04542e+07
4669pos		PC(40:7)+H	PC(40:7)+H	PC	(20:2_20:5)	(20:2)	(20:5)			C48 H83 O8 N1 P1	832.585	506.64	0.0176689	1.00311	0.989157	0.847596	6.59557e+08	5.14115e+08	8.08165e+08	4.41429e+08	7.69002e+08	1.13848e+09	1.8466e+08	1.18115e+09	8.84831e+08	7.0418e+08	8.37247e+08	4.21114e+08	6.89446e+08	5.16986e+08	2.68168e+08	1.62346e+09	7.78111e+08	7.99364e+08	9.69416e+08	5.98607e+08	2.20331e+08	7.9126e+08	8.48814e+08	8.11928e+08	6.1132e+08	6.30227e+08	6.11331e+08
466pos		Cer(d18:2_23:0)+H	Cer(d41:2)+H	Cer	(d18:2_23:0)	(d18:2)	(23:0)			C41 H80 O3 N1	634.613	839.22	0.0715603	1.02287	0.917857	0.338742	1.48321e+08	6.32013e+07	5.8322e+07	1.11133e+08	6.61031e+07	6.20703e+07	6.68092e+07	1.3849e+08	1.05526e+08	1.31811e+08	7.55489e+07	7.42599e+07	6.68619e+07	5.81681e+07	6.40801e+07	6.62557e+07	1.32964e+08	1.09908e+08	1.4784e+08	6.4546e+07	6.30256e+07	1.00323e+08	7.91509e+07	1.76846e+08	5.68038e+07	6.31435e+07	6.53062e+07
4670pos		PC(18:3_22:4)+H	PC(40:7)+H	PC	(18:3_22:4)	(18:3)	(22:4)			C48 H83 O8 N1 P1	832.585	554.873	0.00688623	1.28082	0.193385	1.4333	7.77363e+09	4.58863e+09	8.95114e+09	5.9313e+09	5.5445e+09	2.11831e+09	3.25251e+09	7.10972e+09	5.97256e+09	4.95861e+09	8.30697e+09	3.63425e+09	4.47097e+09	5.84973e+09	4.60466e+09	6.30035e+09	8.35246e+09	7.86566e+09	6.98644e+09	6.6328e+09	3.71943e+09	6.36935e+09	6.11113e+09	6.72521e+09	6.03576e+09	6.1075e+09	6.03471e+09
4673pos		PC(18:4_22:3)+H	PC(40:7)+H	PC	(18:4_22:3)	(18:4)	(22:3)			C48 H83 O8 N1 P1	832.585	647.697	0.0237824	0.919322	0.762811	0.367153	1.90209e+07	3.42401e+07	2.75806e+07	5.43724e+07	2.8369e+07	8.82128e+07	8.82009e+07	4.04926e+07	3.63986e+07	4.05145e+07	3.32514e+07	3.7967e+07	3.96033e+07	9.70201e+07	4.66598e+07	4.52334e+07	3.2848e+07	4.22193e+07	8.79922e+07	7.29372e+07	8.75346e+07	4.5963e+07	3.5884e+07	3.66962e+07	5.28075e+07	5.06917e+07	5.06891e+07
4698pos		PC(18:1e_22:6)+H	PC(40:7e)+H	PC	(18:1e_22:6)	(18:1e)	(22:6)			C48 H85 O7 N1 P1	818.606	586.56	0.0453962	1.01041	0.97005	0.365289	1.46256e+08	9.98207e+07	1.63092e+08	1.01645e+08	1.07403e+08	4.98432e+07	4.44226e+07	1.60623e+08	1.36014e+08	9.7046e+07	1.77602e+08	9.47422e+07	8.02921e+07	1.05862e+08	6.1371e+07	1.39621e+08	1.28606e+08	1.52382e+08	2.40889e+08	1.16723e+08	6.04837e+07	1.12742e+08	1.30403e+08	1.17742e+08	1.03651e+08	1.12204e+08	1.04002e+08
4699pos		PC(18:2e_22:5)+H	PC(40:7e)+H	PC	(18:2e_22:5)	(18:2e)	(22:5)			C48 H85 O7 N1 P1	818.606	599.46	0.035175	0.944404	0.757872	1.40967	7.21453e+08	5.77689e+08	7.01369e+08	5.7354e+08	7.83316e+08	3.68643e+08	3.48779e+08	8.61129e+08	8.17554e+08	6.39945e+08	9.61385e+08	5.46156e+08	4.93078e+08	6.1106e+08	3.59774e+08	8.20382e+08	6.03064e+08	6.55716e+08	1.12429e+09	5.48814e+08	5.73143e+08	5.53766e+08	6.78599e+08	7.63459e+08	5.59899e+08	5.95407e+08	5.95502e+08
4700pos		PC(40:7e)+H	PC(40:7e)+H	PC	(40:7e)	(40:7e)				C48 H85 O7 N1 P1	818.606	648.846	0.0469697	1.10806	0.597461	0.522449	7.94593e+08	8.83555e+08	7.99832e+08	7.6403e+08	1.10093e+09	8.92308e+08	2.22893e+08	1.40643e+09	1.2069e+09	8.22097e+08	8.41129e+08	7.42802e+08	7.67281e+08	8.26532e+08	4.26527e+08	1.18399e+09	7.33155e+08	1.36044e+09	1.75119e+09	8.70706e+08	7.55516e+08	1.04691e+09	1.5255e+09	1.34811e+09	7.91285e+08	8.62358e+08	8.01446e+08
470pos		Cer(d41:4)+H	Cer(d41:4)+H	Cer	(d41:4)	(d41:4)				C41 H76 O3 N1	630.582	816.071	0.0916037	1.21991	0.384953	0.0898419	1.56404e+08	1.18327e+08	1.14423e+08	9.68275e+07	1.10417e+08	1.04698e+08	4.29434e+07	2.64761e+08	2.21414e+08	1.61408e+08	1.03127e+08	9.28809e+07	1.0026e+08	1.02887e+08	1.14816e+08	9.8056e+07	1.11758e+08	1.69678e+08	2.05256e+08	9.43912e+07	9.23166e+07	1.37594e+08	2.02764e+08	2.62128e+08	8.58701e+07	1.03214e+08	9.5521e+07
4728pos		PC(20:4_20:4)+H	PC(40:8)+H	PC	(20:4_20:4)	(20:4)	(20:4)			C48 H81 O8 N1 P1	830.569	505.98	0.00648975	1.09079	0.640727	2.07329	1.83774e+10	9.2349e+09	1.98981e+10	1.18729e+10	1.34245e+10	1.6899e+10	5.09813e+09	1.76443e+10	1.80174e+10	1.10164e+10	1.75055e+10	7.36345e+09	1.129e+10	1.16793e+10	7.42387e+09	1.67193e+10	2.05697e+10	1.5609e+10	1.68076e+10	1.72396e+10	6.27351e+09	1.43194e+10	1.63958e+10	1.82086e+10	1.3262e+10	1.3413e+10	1.34115e+10
4729pos		PC(40:8)+H	PC(40:8)+H	PC	(40:8)	(40:8)				C48 H81 O8 N1 P1	830.569	551.65	0.00899946	1.65675	0.241122	0.649782	6.60366e+07	4.30694e+07	7.14971e+07	3.76648e+07	1.49314e+08	1.17741e+08	1.16145e+08	2.61159e+08	4.82653e+08	5.86106e+07	5.74338e+07	4.95574e+07	2.31916e+08	4.74907e+07	9.85351e+07	5.33435e+07	1.73811e+08	1.16051e+08	5.92981e+07	6.36142e+07	7.56757e+07	7.43041e+07	3.21422e+07	1.00804e+08	5.36371e+07	5.28036e+07	5.28158e+07
474pos		Cer(d21:1_20:4)+H	Cer(d41:5)+H	Cer	(d21:1_20:4)	(d21:1)	(20:4)			C41 H74 O3 N1	628.566	748.233	0.0855156	0.81126	0.266648	0.326374	3.13112e+07	1.62744e+07	2.18639e+07	2.04361e+07	2.21018e+07	1.59712e+07	2.85595e+07	2.72142e+07	2.27545e+07	3.24129e+07	1.92549e+07	1.99613e+07	2.16607e+07	1.90345e+07	1.7539e+07	2.36231e+07	3.10455e+07	1.60818e+07	2.48329e+07	1.97195e+07	9.50894e+06	1.67042e+07	1.55549e+07	2.135e+07	1.61576e+07	1.8363e+07	1.9093e+07
4761pos		PC(40:8e)+H	PC(40:8e)+H	PC	(40:8e)	(40:8e)				C48 H83 O7 N1 P1	816.59	527.626	0.0365122	0.827344	0.442695	0.289144	3.55486e+07	1.38259e+07	3.85422e+07	9.6926e+06	2.20644e+07	2.14866e+07	6.9615e+06	2.21248e+07	2.35052e+07	1.37788e+07	3.81164e+07	8.79802e+06	1.1096e+07	1.38294e+07	1.41984e+07	2.13654e+07	2.89703e+07	1.75769e+07	3.21924e+07	1.40747e+07	7.51034e+06	1.57511e+07	1.87244e+07	2.32095e+07	1.85985e+07	1.85965e+07	1.74456e+07
4763pos		PC(40:8e)+H	PC(40:8e)+H	PC	(40:8e)	(40:8e)				C48 H83 O7 N1 P1	816.59	536.94	0.0119212	0.818915	0.339008	0.589717	6.09659e+07	5.34417e+07	1.00847e+08	3.85466e+07	5.78792e+07	8.52444e+07	1.44329e+07	6.81242e+07	6.85167e+07	4.66286e+07	6.71053e+07	3.20479e+07	2.74032e+07	4.26853e+07	1.96243e+07	5.77557e+07	8.62797e+07	6.01684e+07	7.98807e+07	4.66593e+07	2.92726e+07	5.47629e+07	5.10838e+07	6.46654e+07	4.48926e+07	4.48904e+07	4.39709e+07
4764pos		PC(40:8e)+H	PC(40:8e)+H	PC	(40:8e)	(40:8e)				C48 H83 O7 N1 P1	816.59	587.085	0.0142679	0.966464	0.893966	1.19433	1.0622e+09	7.73211e+08	1.14969e+09	7.11636e+08	8.62745e+08	3.84095e+08	3.63942e+08	1.05086e+09	1.04902e+09	6.9746e+08	1.36302e+09	6.54221e+08	5.93424e+08	7.82524e+08	4.60708e+08	9.53542e+08	9.96539e+08	1.06454e+09	1.6586e+09	8.7192e+08	4.37026e+08	7.64164e+08	9.51622e+08	9.56811e+08	7.95927e+08	8.04304e+08	8.18674e+08
4765pos		PC(40:8e)+H	PC(40:8e)+H	PC	(40:8e)	(40:8e)				C48 H83 O7 N1 P1	816.59	619.02	0.220443	0.604063	0.506194	0.570374	1.89552e+07	3.92855e+07	1.50347e+08	6.58819e+07	3.88412e+07	7.49305e+07	5.76862e+07	2.73853e+07	1.19681e+08	2.94894e+07	2.30097e+08	3.26626e+07	3.52972e+07	7.06707e+07	4.47586e+07	2.29228e+07	2.26903e+07	2.67048e+07	3.14198e+08	1.88839e+07	4.55308e+07	2.32338e+07	1.61643e+08	1.26859e+08	9.61711e+07	1.44858e+08	1.45976e+08
4779pos		PC(18:4_22:5)+H	PC(40:9)+H	PC	(18:4_22:5)	(18:4)	(22:5)			C48 H79 O8 N1 P1	828.554	447.041	0.0767198	0.753771	0.418914	0.551209	7.15305e+07	4.96085e+07	8.59092e+07	5.57937e+07	7.2506e+07	1.66755e+08	7.7914e+06	6.30203e+07	1.40648e+08	5.2875e+07	3.94826e+07	3.03666e+07	3.55729e+07	4.55743e+07	9.71708e+06	6.74081e+07	4.8237e+07	8.15381e+07	6.7873e+07	6.77307e+07	2.50817e+07	6.36768e+07	6.27578e+07	8.96781e+07	5.86822e+07	5.88962e+07	6.69611e+07
4782pos		PC(40:9)+H	PC(40:9)+H	PC	(40:9)	(40:9)				C48 H79 O8 N1 P1	828.554	547.764	0.0149437	1.0499	0.848993	0.426045	1.52394e+08	3.77746e+08	1.70614e+08	2.81626e+08	2.1774e+08	4.00869e+08	7.6505e+08	2.03396e+08	2.31329e+08	2.31548e+08	2.05086e+08	8.52625e+07	1.86879e+08	1.96386e+08	3.78445e+08	2.08718e+08	1.76041e+08	2.24935e+08	1.95611e+08	1.94636e+08	3.08121e+08	4.55435e+08	2.05302e+08	2.03895e+08	2.71719e+08	2.71753e+08	2.7883e+08
478pos		Cer(d18:0_24:0)+H	Cer(d42:0)+H	Cer	(d18:0_24:0)	(d18:0)	(24:0)			C42 H86 O3 N1	652.66	932.528	0.0207989	1.2176	0.681572	0.171852	4.93097e+07	2.75831e+07	1.28177e+07	2.92365e+07	1.64508e+07	1.98772e+07	5.59513e+07	4.5012e+07	8.46796e+07	9.5736e+07	2.41681e+07	3.5988e+07	3.13524e+07	3.58082e+07	6.63549e+07	2.90157e+07	1.96532e+07	3.55373e+07	3.82013e+07	4.24137e+07	1.26504e+08	2.58605e+07	2.04535e+07	2.77321e+07	3.68165e+07	3.82855e+07	3.80275e+07
4798pos		PC(18:3e_22:6)+H	PC(40:9e)+H	PC	(18:3e_22:6)	(18:3e)	(22:6)			C48 H81 O7 N1 P1	814.575	527.202	0.0108918	0.824671	0.399605	0.801763	2.53247e+08	1.01078e+08	2.91806e+08	8.70081e+07	1.42575e+08	1.44303e+08	5.35457e+07	1.47761e+08	1.43074e+08	1.1869e+08	2.68077e+08	6.82918e+07	8.73064e+07	1.04237e+08	7.97359e+07	1.39763e+08	2.39838e+08	1.43116e+08	2.24602e+08	1.1714e+08	4.71798e+07	1.11879e+08	1.22116e+08	1.45019e+08	1.25972e+08	1.28373e+08	1.2599e+08
4801pos		PC(41:4)+H	PC(41:4)+H	PC	(41:4)	(41:4)				C49 H91 O8 N1 P1	852.648	715.74	0.0833344	1.73668	0.0320999	0.488576	5.34564e+07	2.60169e+07	2.55869e+07	2.91859e+07	3.30926e+07	2.20703e+07	3.09598e+07	8.37844e+07	5.17344e+07	2.75017e+07	3.67591e+07	2.24223e+07	3.26814e+07	2.93443e+07	2.65004e+07	2.55093e+07	3.95216e+07	6.13682e+07	4.94209e+07	7.57776e+07	3.28444e+07	4.88322e+07	5.40025e+07	7.1417e+07	2.37837e+07	2.75787e+07	2.75856e+07
4805pos		PC(20:4_21:1)+H	PC(41:5)+H	PC	(20:4_21:1)	(20:4)	(21:1)			C49 H89 O8 N1 P1	850.632	691.81	0.0611446	1.6021	0.0739646	0.791261	1.06176e+08	1.05031e+08	1.03507e+08	1.01132e+08	1.32727e+08	7.9301e+07	3.16329e+07	2.74121e+08	2.02624e+08	1.05836e+08	1.03143e+08	8.31209e+07	1.58556e+08	9.50784e+07	9.83191e+07	9.114e+07	8.09612e+07	2.49681e+08	1.91209e+08	2.87956e+08	7.03701e+07	1.48038e+08	2.16258e+08	2.76094e+08	9.50516e+07	1.06299e+08	1.05407e+08
4810pos		PC(41:6)+H	PC(41:6)+H	PC	(41:6)	(41:6)				C49 H87 O8 N1 P1	848.616	663.205	0.0318199	1.15904	0.372533	0.838286	2.32544e+09	4.57622e+08	2.21946e+09	8.87665e+08	8.29692e+08	5.74504e+08	5.23121e+08	1.06406e+09	9.78611e+08	8.26224e+08	1.88512e+09	6.57286e+08	8.6487e+08	8.20484e+08	8.4084e+08	9.90757e+08	2.15072e+09	8.32989e+08	8.00618e+08	1.01206e+09	3.37129e+08	8.857e+08	8.20581e+08	1.31099e+09	8.43573e+08	8.96021e+08	8.55321e+08
4813pos		PC(41:7)+H	PC(41:7)+H	PC	(41:7)	(41:7)				C49 H85 O8 N1 P1	846.601	585.279	0.0283863	1.296	0.291403	0.215132	1.14881e+08	2.58891e+07	1.44804e+08	4.85791e+07	4.60172e+07	1.89604e+07	3.39714e+07	6.90386e+07	4.68239e+07	4.26694e+07	1.0478e+08	2.81883e+07	4.43699e+07	4.69992e+07	5.0428e+07	5.11557e+07	1.08386e+08	5.00728e+07	6.08328e+07	5.47237e+07	1.52438e+07	4.85279e+07	6.11807e+07	7.08612e+07	5.09884e+07	5.13137e+07	5.3692e+07
4814pos		PC(31:0_11:0)+H	PC(42:0)+H	PC	(31:0_11:0)	(31:0)	(11:0)			C50 H101 O8 N1 P1	874.726	953.7	0.022208	0.953362	0.928678	0.178748	4.41717e+07	9.01588e+06	1.41039e+07	1.42526e+07	9.72762e+06	7.36636e+06	2.90206e+07	1.46346e+07	3.10799e+07	4.25367e+07	1.61918e+07	1.52414e+07	7.09726e+06	1.211e+07	4.93019e+07	1.2807e+07	1.69489e+07	1.20093e+07	1.28055e+07	1.69452e+07	4.52234e+07	8.72308e+06	4.49632e+06	8.51463e+06	1.63893e+07	1.70355e+07	1.70371e+07
4819pos		PC(31:1_11:0)+H	PC(42:1)+H	PC	(31:1_11:0)	(31:1)	(11:0)			C50 H99 O8 N1 P1	872.71	881.086	0.0182133	1.66718	0.127181	0.151398	1.34139e+07	4.32934e+06	3.84656e+06	1.36554e+08	2.93177e+06	3.57306e+06	1.1216e+08	1.25882e+07	9.26787e+06	1.1592e+07	2.21417e+07	5.6504e+06	4.63222e+06	9.835e+06	1.40368e+07	5.75525e+06	2.8211e+07	1.04091e+07	5.57659e+06	5.68725e+07	1.61383e+07	7.36736e+06	4.97057e+06	1.29662e+07	1.41073e+07	1.45547e+07	1.45687e+07
4824pos		PC(42:10e)+H	PC(42:10e)+H	PC	(42:10e)	(42:10e)				C50 H83 O7 N1 P1	840.59	731.131	0.0714203	1.10887	0.433052	0.0839935	4.65645e+07	1.09353e+07	1.43298e+07	1.34584e+07	1.69056e+07	6.99097e+06	1.41568e+07	1.42103e+07	1.19455e+07	1.73417e+07	3.22743e+07	1.2254e+07	1.66666e+07	1.34482e+07	3.48585e+07	1.16144e+07	4.74391e+07	1.23234e+07	1.36663e+07	1.73557e+07	1.61268e+07	1.28708e+07	1.43977e+07	1.4119e+07	1.22961e+07	1.38257e+07	1.40559e+07
4825pos		PC(42:11)+H	PC(42:11)+H	PC	(42:11)	(42:11)				C50 H79 O8 N1 P1	852.554	433.68	0.0145129	0.948386	0.873951	0.142052	6.99275e+06	1.09809e+07	6.38694e+06	1.02903e+07	8.08315e+06	1.6904e+07	1.88212e+06	1.49363e+07	1.56247e+07	5.41905e+06	5.53195e+06	5.19901e+06	5.80152e+06	6.12518e+06	1.67402e+06	8.61781e+06	1.10087e+07	1.89277e+07	1.50082e+07	9.78998e+06	2.13427e+06	6.29841e+06	1.0317e+07	1.49035e+07	8.97301e+06	8.75141e+06	8.97723e+06
4829pos		PC(20:0_22:2)+H	PC(42:2)+H	PC	(20:0_22:2)	(20:0)	(22:2)			C50 H97 O8 N1 P1	870.695	828.005	0.077122	1.27036	0.371702	0.0569951	2.81082e+07	1.0598e+07	1.1874e+07	6.50092e+07	1.11679e+07	1.12528e+07	5.31831e+07	1.35638e+07	1.54825e+07	2.59019e+07	1.51971e+07	1.13762e+07	1.52428e+07	1.16286e+07	2.28336e+07	1.2308e+07	2.89722e+07	1.82358e+07	1.13259e+07	2.80323e+07	3.18809e+07	1.33961e+07	1.13706e+07	1.62501e+07	1.16319e+07	1.33338e+07	1.33414e+07
4831pos		PC(42:4)+Na	PC(42:4)+Na	PC	(42:4)	(42:4)				C50 H92 O8 N1 P1 Na1	888.645	684.732	0.102452	1.09822	0.639895	0.099109	5.63858e+07	2.07601e+07	4.00518e+07	2.88241e+07	4.28598e+07	2.44059e+07	1.28699e+07	5.49254e+07	4.06364e+07	3.98749e+07	5.42819e+07	2.57913e+07	2.71829e+07	2.88263e+07	2.36289e+07	4.15912e+07	5.62584e+07	4.24658e+07	3.27949e+07	3.3173e+07	1.96031e+07	2.77757e+07	3.28504e+07	5.37517e+07	2.42836e+07	2.92454e+07	2.50004e+07
4832pos		PC(20:0_22:4)+H	PC(42:4)+H	PC	(20:0_22:4)	(20:0)	(22:4)			C50 H93 O8 N1 P1	866.663	734.265	0.0670514	1.32892	0.156973	0.1786	3.06303e+07	3.23079e+07	2.7112e+07	6.98924e+07	4.10209e+07	3.16994e+07	3.62691e+07	5.31277e+07	4.23202e+07	3.11074e+07	3.02263e+07	3.08213e+07	2.98398e+07	2.80497e+07	3.17964e+07	2.95205e+07	3.15431e+07	7.58428e+07	6.2043e+07	5.32456e+07	3.91204e+07	5.77452e+07	4.86474e+07	6.16539e+07	2.55045e+07	2.87544e+07	2.86742e+07
4835pos		PC(22:0_20:5)+H	PC(42:5)+H	PC	(22:0_20:5)	(22:0)	(20:5)			C50 H91 O8 N1 P1	864.648	702.486	0.0548392	1.23389	0.205706	0.144893	1.04126e+08	7.18019e+07	7.96505e+07	8.85013e+07	1.13606e+08	7.48328e+07	7.34849e+07	1.26391e+08	1.28675e+08	8.28158e+07	1.03499e+08	7.51433e+07	7.77009e+07	7.33958e+07	8.09556e+07	7.38349e+07	1.04506e+08	1.5156e+08	1.20879e+08	1.26488e+08	7.22396e+07	1.06844e+08	1.30431e+08	1.3733e+08	7.58263e+07	8.3941e+07	8.29969e+07
4836pos		PC(30:1_12:4)+H	PC(42:5)+H	PC	(30:1_12:4)	(30:1)	(12:4)			C50 H91 O8 N1 P1	864.648	727.763	0.0606134	1.65073	0.030073	0.59206	3.20809e+07	3.20634e+07	3.07337e+07	4.23248e+07	6.54379e+07	3.79038e+07	5.33573e+06	7.71246e+07	6.41386e+07	3.05847e+07	3.37712e+07	3.14761e+07	6.91929e+07	2.11363e+07	2.74107e+07	3.28439e+07	1.64948e+07	1.00435e+08	5.29919e+07	9.25048e+07	3.44002e+07	5.6789e+07	7.54957e+07	1.01287e+08	2.79808e+07	2.96335e+07	3.1581e+07
483neg		Hex1Cer(d41:1)+HCOO	Hex1Cer(d41:1)+HCOO	Hex1Cer	(d41:1)	(d41:1)				C48 H92 O10 N1	842.673	812.617	0.0135145	0.944096	0.752276	0.334789	9.98471e+06	2.15713e+07	8.27452e+06	6.92434e+07	1.43542e+07	1.91844e+07	3.7316e+07	6.50758e+06	1.65748e+07	1.91308e+07	4.79114e+06	1.81732e+07	1.53639e+07	2.36483e+07	1.10255e+07	1.60756e+07	1.80688e+07	1.87919e+07	2.19736e+07	3.93709e+07	2.97464e+07	2.06723e+07	1.69108e+07	1.85586e+07	1.35233e+07	1.32085e+07	1.35218e+07
4841pos		PC(22:2_20:4)+H	PC(42:6)+H	PC	(22:2_20:4)	(22:2)	(20:4)			C50 H89 O8 N1 P1	862.632	678.12	0.0674841	0.973628	0.823298	0.947782	1.01324e+09	3.08543e+08	7.15654e+08	3.95944e+08	5.47444e+08	3.98286e+08	1.71493e+08	4.01111e+08	5.04777e+08	3.22081e+08	7.30114e+08	4.07591e+08	4.70113e+08	3.22755e+08	4.4225e+08	4.37237e+08	1.12241e+09	3.7025e+08	3.30496e+08	4.21884e+08	2.78343e+08	3.65694e+08	3.67893e+08	6.01957e+08	3.35497e+08	3.77673e+08	3.7837e+08
4848pos		PC(42:6e)+H	PC(42:6e)+H	PC	(42:6e)	(42:6e)				C50 H91 O7 N1 P1	848.653	712.003	0.100048	1.77855	0.0451637	0.972575	1.16744e+08	1.33231e+08	5.50879e+07	1.22498e+08	1.13231e+08	1.34997e+08	2.11825e+07	3.19074e+08	2.31439e+08	8.57219e+07	8.5698e+07	1.08206e+08	1.37349e+08	1.21086e+08	4.89833e+07	1.21825e+08	1.14486e+08	3.09069e+08	2.00476e+08	2.17388e+08	8.88357e+07	2.10272e+08	3.15311e+08	4.11177e+08	9.22382e+07	1.10437e+08	1.1018e+08
4850pos		PC(42:7)+H	PC(42:7)+H	PC	(42:7)	(42:7)				C50 H87 O8 N1 P1	860.616	602.879	0.102292	0.794494	0.519523	0.305813	8.11237e+07	3.00987e+07	8.7574e+07	3.1096e+07	2.7706e+07	2.02565e+07	2.92252e+07	3.66326e+07	4.1354e+07	6.57269e+07	2.89405e+07	1.79158e+07	4.9829e+07	6.57792e+07	1.20301e+07	4.20126e+07	6.90721e+07	3.72502e+07	9.04739e+07	3.71377e+07	1.36526e+07	3.45287e+07	2.84607e+07	8.60954e+07	4.79041e+07	4.81034e+07	3.99747e+07
4851pos		PC(42:7)+H	PC(42:7)+H	PC	(42:7)	(42:7)				C50 H87 O8 N1 P1	860.616	631.31	0.110734	1.19154	0.16043	0.548103	4.31863e+08	1.37649e+08	4.70755e+08	2.28301e+08	2.21751e+08	1.81046e+08	2.15333e+08	2.37606e+08	2.14501e+08	2.02122e+08	3.66986e+08	1.59631e+08	2.35103e+08	2.16217e+08	2.11667e+08	2.46427e+08	4.41281e+08	2.33301e+08	2.16217e+08	2.08436e+08	1.31803e+08	2.23346e+08	2.71484e+08	2.52897e+08	2.24809e+08	2.72388e+08	2.27424e+08
4853pos		PC(20:4e_22:3)+H	PC(42:7e)+H	PC	(20:4e_22:3)	(20:4e)	(22:3)			C50 H89 O7 N1 P1	846.637	709.8	0.0726787	1.55295	0.102479	0.427733	5.50715e+07	2.95013e+07	1.96465e+07	5.91457e+07	5.98731e+07	3.35356e+07	9.04918e+06	7.26486e+07	5.89883e+07	2.82711e+07	3.57833e+07	2.93864e+07	4.20302e+07	3.51596e+07	1.75093e+07	2.80697e+07	4.9117e+07	1.00267e+08	7.6616e+07	9.05295e+07	3.28299e+07	7.11252e+07	8.04906e+07	9.50557e+07	3.09626e+07	3.30999e+07	3.57901e+07
4858pos		PC(22:4_20:4)+H	PC(42:8)+H	PC	(22:4_20:4)	(22:4)	(20:4)			C50 H85 O8 N1 P1	858.601	539.244	0.123341	1.36202	0.178084	0.129852	1.77543e+07	2.12916e+07	7.24464e+07	1.82137e+07	1.54027e+07	3.61362e+07	4.87217e+06	2.7327e+07	2.84651e+07	1.10667e+07	1.37777e+07	1.04265e+07	1.83742e+07	1.56297e+07	3.94235e+07	2.35383e+07	2.34105e+07	2.55751e+07	2.12159e+07	1.99555e+07	1.88259e+07	3.63049e+07	3.09606e+07	2.1374e+07	1.18619e+07	1.17868e+07	1.45433e+07
4859pos		PC(42:8)+H	PC(42:8)+H	PC	(42:8)	(42:8)				C50 H85 O8 N1 P1	858.601	563.897	0.0402561	1.10782	0.542378	0.223401	2.4306e+08	1.48973e+08	2.38003e+08	1.73272e+08	1.47376e+08	1.06278e+08	7.84056e+07	1.70094e+08	1.71403e+08	1.0762e+08	2.02606e+08	1.04432e+08	1.18747e+08	1.72856e+08	9.52094e+07	1.86723e+08	2.15185e+08	1.98587e+08	2.17574e+08	1.89467e+08	9.84156e+07	1.80321e+08	1.55822e+08	1.72939e+08	1.52616e+08	1.63672e+08	1.63877e+08
4862pos		PC(42:9)+H	PC(42:9)+H	PC	(42:9)	(42:9)				C50 H83 O8 N1 P1	856.585	527.28	0.0059645	1.32604	0.296007	0.255647	1.06835e+08	1.06996e+08	1.07508e+08	1.26292e+08	8.69956e+07	1.07847e+08	2.53275e+07	1.47176e+08	1.61518e+08	6.29873e+07	8.58878e+07	6.03585e+07	1.06038e+08	9.10404e+07	4.0507e+07	1.42508e+08	1.12373e+08	2.2753e+08	2.16645e+08	1.73537e+08	7.30958e+07	1.50468e+08	1.4678e+08	1.61583e+08	9.87219e+07	9.97549e+07	9.97427e+07
4865pos		PC(22:5_22:6)+H	PC(44:11)+H	PC	(22:5_22:6)	(22:5)	(22:6)			C52 H83 O8 N1 P1	880.585	481.14	0.0146631	1.09336	0.711481	0.134311	8.7561e+07	5.27629e+07	9.58223e+07	5.09642e+07	5.92529e+07	9.53653e+07	2.78585e+07	1.18536e+08	9.1066e+07	5.44192e+07	1.04841e+08	3.78632e+07	5.70609e+07	5.54716e+07	2.55061e+07	7.53516e+07	9.46936e+07	8.6112e+07	1.16538e+08	5.62194e+07	3.38016e+07	7.227e+07	8.72774e+07	9.67081e+07	6.24067e+07	6.24997e+07	6.40508e+07
4866pos		PC(22:6_22:6)+Na	PC(44:12)+Na	PC	(22:6_22:6)	(22:6)	(22:6)			C52 H80 O8 N1 P1 Na1	900.551	455.809	0.00647624	1.11361	0.64604	0.203724	8.88206e+07	2.56414e+07	9.34026e+07	4.51055e+07	3.10845e+07	4.75115e+07	3.41537e+07	5.50333e+07	6.04573e+07	2.77777e+07	9.49677e+07	1.86799e+07	2.24045e+07	3.87986e+07	2.77842e+07	5.08066e+07	9.17907e+07	4.40941e+07	6.96433e+07	6.70287e+07	4.30476e+07	3.79673e+07	4.28236e+07	7.70565e+07	4.14521e+07	4.19217e+07	4.14579e+07
4867pos		PC(44:12)+H	PC(44:12)+H	PC	(22:6_22:6)	(22:6)	(22:6)			C52 H81 O8 N1 P1	878.569	455.809	0.00298235	1.05689	0.809707	0.491255	6.55861e+08	1.90423e+08	5.99882e+08	2.94901e+08	2.13232e+08	3.17935e+08	2.38224e+08	3.77835e+08	4.06618e+08	1.78384e+08	6.31505e+08	1.32939e+08	1.67643e+08	2.54277e+08	2.17509e+08	3.50569e+08	5.95461e+08	2.98226e+08	4.42542e+08	2.70508e+08	1.82087e+08	2.48553e+08	2.85047e+08	4.94778e+08	2.82525e+08	2.83978e+08	2.82507e+08
4868pos		PC(44:5e)+H	PC(44:5e)+H	PC	(44:5e)	(44:5e)				C52 H97 O7 N1 P1	878.7	804.203	0.117823	1.99553	0.00539307	0.423161	4.58327e+06	8.12845e+06	1.17416e+06	1.28619e+07	7.6107e+06	7.44514e+06	4.13935e+07	1.72339e+07	6.22067e+06	1.89359e+07	2.26533e+06	8.77545e+06	1.645e+07	8.45323e+06	3.99752e+06	7.63311e+06	4.51492e+06	2.18747e+07	1.7924e+07	7.65807e+06	2.73179e+07	2.3092e+07	3.13634e+07	1.37787e+07	6.12358e+06	7.6321e+06	6.45052e+06
4869pos		PC(44:6)+H	PC(44:6)+H	PC	(44:6)	(44:6)				C52 H93 O8 N1 P1	890.663	753.72	0.0737229	1.70143	0.0120738	0.310878	2.47153e+07	8.82675e+06	9.47585e+06	1.22663e+07	8.22246e+06	9.64624e+06	9.67217e+06	2.65092e+07	2.34813e+07	1.398e+07	9.94322e+06	9.98577e+06	1.45883e+07	1.01231e+07	9.61597e+06	9.70982e+06	2.24075e+07	2.13619e+07	1.46195e+07	2.39579e+07	1.07516e+07	1.80543e+07	1.98053e+07	3.18957e+07	8.99654e+06	1.02514e+07	1.0253e+07
4874pos		PC(28:1_22:5)+H	PC(50:6)+H	PC	(28:1_22:5)	(28:1)	(22:5)			C58 H105 O8 N1 P1	974.757	822.417	0.0414445	1.06096	0.656928	0.115023	1.32906e+07	1.35162e+07	1.01238e+07	2.11268e+07	9.43709e+06	1.20368e+07	1.10491e+07	1.1095e+07	1.25254e+07	9.01137e+06	1.49218e+07	1.04194e+07	1.03101e+07	1.12895e+07	7.87216e+06	9.386e+06	1.6943e+07	1.40501e+07	1.82669e+07	1.09286e+07	1.51233e+07	1.42943e+07	1.22459e+07	1.92273e+07	8.31772e+06	9.01969e+06	8.54987e+06
4876pos		PE(16:0e)+Na	PE(16:0e)+Na	PE	(16:0e)	(16:0e)				C21 H44 O7 N1 P1 Na1	476.275	113.394	0.0210207	1.1785	0.314294	0.0595719	1.59306e+07	1.27039e+07	1.93203e+07	2.13292e+07	1.97905e+07	2.45008e+07	1.34422e+07	2.19957e+07	2.50024e+07	1.95346e+07	1.45884e+07	6.63917e+06	1.71094e+07	1.56865e+07	1.13647e+07	1.96698e+07	2.27343e+07	2.23997e+07	1.90196e+07	2.53814e+07	1.55495e+07	2.04438e+07	2.29315e+07	2.54772e+07	1.95431e+07	2.02732e+07	2.02715e+07
4877pos		PE(16:0e)+H	PE(16:0e)+H	PE	(16:0e)	(16:0e)				C21 H45 O7 N1 P1	454.293	113.394	0.0123177	1.02094	0.918275	0.342522	2.13456e+08	1.19978e+08	2.85956e+08	2.38042e+08	2.48133e+08	2.98424e+08	1.71661e+08	2.3209e+08	2.53974e+08	2.68241e+08	1.90044e+08	6.5295e+07	1.81623e+08	1.56735e+08	1.26627e+08	2.31174e+08	3.11956e+08	2.2269e+08	1.68059e+08	2.46042e+08	1.68262e+08	1.95325e+08	1.92599e+08	3.39365e+08	1.94344e+08	1.98497e+08	1.94299e+08
4881pos		PE(18:0e)+H	PE(18:0e)+H	PE	(18:0e)	(18:0e)				C23 H49 O7 N1 P1	482.324	93.9284	0.0087019	0.723352	0.363666	0.462312	3.63697e+07	1.54867e+07	5.27677e+07	3.69395e+07	5.87754e+07	7.52484e+07	2.71726e+07	5.63519e+07	4.1575e+07	9.34188e+07	3.79041e+07	1.21717e+07	2.16246e+07	2.9006e+07	1.69517e+07	4.64877e+07	4.38899e+07	3.64558e+07	3.74739e+07	4.1997e+07	3.31003e+07	3.18098e+07	3.22922e+07	6.75324e+07	3.31211e+07	3.31272e+07	3.36259e+07
4898pos		PE(12:0p_6:0)+H	PE(18:0p)+H	PE	(12:0p_6:0)	(12:0p)	(6:0)			C23 H47 O7 N1 P1	480.308	113.684	0.0130496	1.18376	0.412546	0.181134	2.71624e+08	1.59471e+08	3.69297e+08	3.68476e+08	3.12313e+08	3.8719e+08	2.12504e+08	3.65842e+08	3.33035e+08	3.51295e+08	2.40401e+08	7.58532e+07	2.54409e+08	2.12634e+08	1.59786e+08	3.43509e+08	4.21337e+08	3.81939e+08	2.52377e+08	3.54293e+08	2.19777e+08	3.13228e+08	2.86018e+08	4.92855e+08	2.6054e+08	2.66492e+08	2.60576e+08
4905pos		PE(8:1e_10:0)+Na	PE(18:1e)+Na	PE	(8:1e_10:0)	(8:1e)	(10:0)			C23 H46 O7 N1 P1 Na1	502.29	691.387	0.129824	1.37544	0.127975	0.181193	1.65615e+07	1.48152e+07	1.22193e+07	2.19865e+07	1.9178e+07	1.61252e+07	1.23802e+07	3.63259e+07	2.46403e+07	2.12004e+07	1.49599e+07	1.72991e+07	1.82027e+07	1.60189e+07	1.53294e+07	1.85803e+07	1.6356e+07	3.73212e+07	3.59797e+07	2.01303e+07	1.82687e+07	3.08417e+07	3.04159e+07	2.56821e+07	1.27731e+07	1.62155e+07	1.33964e+07
4908pos		PE(8:1e_10:1)+Na	PE(18:2e)+Na	PE	(8:1e_10:1)	(8:1e)	(10:1)			C23 H44 O7 N1 P1 Na1	500.275	93.2903	0.0444179	1.0803	0.69602	0.0641839	1.07895e+07	4.12133e+06	8.78338e+06	9.50984e+06	1.30813e+07	1.3719e+07	5.00442e+06	1.0632e+07	1.05663e+07	1.25519e+07	6.80732e+06	5.95365e+06	8.57338e+06	8.1094e+06	4.66479e+06	7.74713e+06	1.24778e+07	1.36004e+07	7.39472e+06	1.21972e+07	7.6411e+06	1.08599e+07	1.00778e+07	7.57474e+06	1.07378e+07	1.16131e+07	1.16039e+07
4915pos		PE(8:0e_11:0)+Na	PE(19:0e)+Na	PE	(8:0e_11:0)	(8:0e)	(11:0)			C24 H50 O7 N1 P1 Na1	518.322	79.74	0.0088391	0.635941	0.252124	0.548867	2.01022e+07	2.01985e+07	3.43079e+07	4.18133e+07	8.32955e+07	1.04738e+08	6.79055e+06	4.58253e+07	5.62166e+07	6.96165e+07	2.20178e+07	1.16107e+07	2.48672e+07	2.52947e+07	9.07021e+06	4.48665e+07	3.13032e+07	3.8797e+07	3.30216e+07	5.06791e+07	1.79802e+07	4.80504e+07	2.95587e+07	7.33938e+07	3.43256e+07	3.4326e+07	3.3803e+07
492neg		Hex2Cer(t34:4)+HCOO	Hex2Cer(t34:4)+HCOO	Hex2Cer	(t34:4)	(t34:4)				C47 H82 O16 N1	916.564	697.74	0.0536276	0.90582	0.65276	0.248784	5.84605e+06	5.31363e+06	7.65493e+06	9.62099e+06	5.96136e+06	7.25465e+06	1.15067e+07	2.6953e+06	4.53987e+06	7.34781e+06	2.20496e+06	7.30894e+06	4.52241e+06	1.08753e+07	5.71454e+06	4.91527e+06	1.00675e+07	7.11803e+06	6.6495e+06	7.94079e+06	1.18583e+07	4.72523e+06	5.16482e+06	5.71107e+06	6.8237e+06	7.50149e+06	7.49722e+06
4936pos		PE(10:1e_10:2)+Na	PE(20:3e)+Na	PE	(10:1e_10:2)	(10:1e)	(10:2)			C25 H46 O7 N1 P1 Na1	526.29	85.2552	0.00174144	1.11326	0.657801	0.298275	1.63711e+09	4.78736e+08	2.56e+09	1.95728e+09	2.06223e+09	2.48236e+09	4.42191e+08	2.39016e+09	2.69265e+09	1.27008e+09	1.33065e+09	8.72394e+08	1.42145e+09	1.41787e+09	5.64736e+08	1.61128e+09	2.25017e+09	1.99281e+09	1.75775e+09	1.12959e+09	9.25483e+08	1.56991e+09	1.63445e+09	2.86334e+09	1.63315e+09	1.63318e+09	1.63809e+09
4938pos		PE(10:1e_10:2)+Na	PE(20:3e)+Na	PE	(10:1e_10:2)	(10:1e)	(10:2)			C25 H46 O7 N1 P1 Na1	526.29	165.722	0.00897275	1.39098	0.169577	0.218267	1.9307e+07	1.16967e+07	2.32686e+07	2.68542e+07	3.3208e+07	3.13166e+07	1.31661e+07	3.5486e+07	4.94518e+07	2.5363e+07	1.64911e+07	1.0085e+07	1.9812e+07	2.26507e+07	7.11395e+06	2.52517e+07	2.61383e+07	4.70324e+07	3.07857e+07	4.54817e+07	1.85776e+07	3.80858e+07	3.91585e+07	4.11114e+07	3.55163e+07	3.55394e+07	3.60825e+07
4946pos		PE(10:1e_10:2)+Na	PE(20:3e)+Na	PE	(10:1e_10:2)	(10:1e)	(10:2)			C25 H46 O7 N1 P1 Na1	526.29	601.586	0.0738001	1.03878	0.732976	0.283806	7.64493e+07	5.10933e+07	7.51267e+07	5.0825e+07	7.55979e+07	3.67348e+07	4.23929e+07	5.75382e+07	6.80656e+07	5.81286e+07	4.10589e+07	5.82868e+07	5.14483e+07	5.9474e+07	5.12379e+07	6.29573e+07	8.71251e+07	6.08367e+07	5.69993e+07	5.15399e+07	5.18678e+07	7.41654e+07	5.40468e+07	8.09595e+07	5.33683e+07	6.07814e+07	5.39035e+07
494pos		Cer(d18:1_24:0+O)+H	Cer(d42:1+O)+H	Cer	(d18:1_24:0+O)	(d18:1)	(24:0+O)			C42 H84 O4 N1	666.639	816.24	0.0619367	1.29892	0.209077	0.117848	2.07685e+07	1.71669e+07	1.25266e+07	3.86966e+07	1.82932e+07	1.76271e+07	1.99983e+07	2.96604e+07	2.19554e+07	4.03409e+07	1.97556e+07	2.45948e+07	1.66343e+07	1.74864e+07	2.07535e+07	2.12211e+07	2.1269e+07	3.65941e+07	3.53788e+07	2.17614e+07	4.50004e+07	3.88457e+07	3.25221e+07	4.08553e+07	1.47195e+07	1.64114e+07	1.64289e+07
4958pos		PE(8:1e_12:3)+Na	PE(20:4e)+Na	PE	(8:1e_12:3)	(8:1e)	(12:3)			C25 H44 O7 N1 P1 Na1	524.275	93.42	0.0161091	1.44896	0.00283517	0.278575	9.0729e+06	1.2871e+07	6.34955e+06	1.88678e+07	1.76551e+07	1.40765e+07	1.07668e+07	2.63039e+07	7.05674e+06	1.61573e+07	1.07442e+07	1.56251e+07	1.78913e+07	1.83537e+07	7.23144e+06	1.58045e+07	1.4093e+07	2.47535e+07	2.17093e+07	2.20626e+07	2.72101e+07	2.38813e+07	2.20944e+07	1.88261e+07	2.12137e+07	2.18197e+07	2.18139e+07
4959pos		PE(8:1e_12:3)+H	PE(20:4e)+H	PE	(8:1e_12:3)	(8:1e)	(12:3)			C25 H45 O7 N1 P1	502.293	93.42	0.00832377	1.24129	0.2222	0.282023	2.21807e+08	1.78096e+08	2.97764e+08	4.13706e+08	3.77201e+08	4.35344e+08	1.11937e+08	5.0874e+08	4.92824e+08	2.83564e+08	1.99643e+08	1.87214e+08	2.76701e+08	2.75287e+08	9.22326e+07	3.23916e+08	2.88088e+08	4.57807e+08	3.74901e+08	3.65626e+08	3.08335e+08	3.70176e+08	3.57643e+08	5.47421e+08	3.15059e+08	3.15063e+08	3.19625e+08
4960pos		PE(8:1e_12:3)+Na	PE(20:4e)+Na	PE	(8:1e_12:3)	(8:1e)	(12:3)			C25 H44 O7 N1 P1 Na1	524.275	121.958	0.0104341	1.63792	0.0884597	0.187002	4.70888e+06	2.87723e+06	5.70727e+06	7.752e+06	9.26384e+06	9.8918e+06	4.08053e+06	1.22117e+07	1.17863e+07	5.43615e+06	3.81071e+06	1.8084e+06	5.98235e+06	5.97672e+06	1.95406e+06	5.8451e+06	7.11008e+06	1.45849e+07	8.12229e+06	1.09658e+07	4.94853e+06	1.07599e+07	1.27705e+07	1.0439e+07	1.04723e+07	1.05111e+07	1.06794e+07
4964pos		PE(11:0_10:3)+Na	PE(21:3)+Na	PE	(11:0_10:3)	(11:0)	(10:3)			C26 H46 O8 N1 P1 Na1	554.285	83.0715	0.0095082	1.39564	0.252136	0.253958	8.14672e+07	2.99075e+07	3.93079e+07	9.74613e+07	7.36189e+07	1.12635e+08	7.93409e+06	9.90495e+07	4.18937e+07	2.96252e+07	6.42347e+07	2.99405e+07	4.1551e+07	1.16429e+08	1.7917e+07	3.9547e+07	1.02317e+08	9.95331e+07	6.49914e+07	9.14829e+07	3.89693e+07	9.40407e+07	1.02376e+08	1.18669e+08	2.83869e+07	2.83781e+07	2.88524e+07
4965pos		PE(22:4e)+H	PE(22:4e)+H	PE	(22:4e)	(22:4e)				C27 H49 O7 N1 P1	530.324	112.173	0.0123193	1.131	0.47465	0.0491702	7.02583e+06	1.12054e+07	1.25058e+07	2.01041e+07	2.21859e+07	2.19115e+07	6.05536e+06	2.41166e+07	2.24364e+07	1.64275e+07	3.79821e+06	7.58167e+06	1.34123e+07	1.16208e+07	4.65988e+06	1.39391e+07	1.27911e+07	2.13126e+07	1.90775e+07	1.82492e+07	1.60451e+07	1.95314e+07	1.6861e+07	2.37149e+07	1.44618e+07	1.47728e+07	1.44623e+07
4966pos		PE(8:1e_14:4)+Na	PE(22:5e)+Na	PE	(8:1e_14:4)	(8:1e)	(14:4)			C27 H46 O7 N1 P1 Na1	550.29	98.58	0.0691647	1.42813	0.159734	0.18624	5.05595e+06	1.64458e+07	6.4057e+06	2.06164e+07	2.35573e+07	1.97634e+07	792385	3.23108e+07	2.88971e+07	1.33487e+07	3.20731e+06	1.36134e+07	1.71979e+07	1.46094e+07	2.40761e+06	1.64224e+07	7.00927e+06	4.47821e+07	2.71471e+07	3.46265e+07	1.19361e+07	2.41352e+07	3.22672e+07	3.10921e+07	2.02134e+07	2.02454e+07	2.27534e+07
496neg		LPC(16:0)+HCOO	LPC(16:0)+HCOO	LPC	(16:0)	(16:0)				C25 H51 O9 N1 P1	540.331	108.387	0.00531391	0.890835	0.40595	1.59242	1.47517e+09	1.37089e+09	1.49848e+09	1.288e+09	1.57952e+09	1.83078e+09	8.13532e+08	1.50003e+09	1.38532e+09	1.80789e+09	1.26954e+09	8.82666e+08	1.66308e+09	8.83598e+08	1.12204e+09	1.27781e+09	1.50202e+09	1.34188e+09	1.23679e+09	1.30688e+09	9.62161e+08	1.1758e+09	1.11492e+09	1.73456e+09	1.11395e+09	1.1141e+09	1.12431e+09
4972pos		PE(25:3)+H	PE(25:3)+H	PE	(25:3)	(25:3)				C30 H55 O8 N1 P1	588.366	142.473	0.0491801	0.78968	0.646335	0.111464	3.29934e+06	2.13912e+06	2.5543e+06	1.36178e+06	2.13404e+06	2.2446e+06	8.58906e+06	685578	320828	4.44063e+06	4.52625e+06	2.15949e+06	148018	4.5921e+06	4.19741e+06	4.57704e+06	4.3617e+06	680431	1.93277e+06	1.71584e+06	6.73918e+06	3.11169e+06	520299	2.03484e+06	1.21306e+06	1.20895e+06	1.31711e+06
4976pos		PE(16:0_16:0)+H	PE(32:0)+H	PE	(16:0_16:0)	(16:0)	(16:0)			C37 H75 O8 N1 P1	692.522	644.798	0.040136	1.40343	0.476062	0.185872	4.1319e+07	1.43736e+07	4.32287e+07	2.8146e+07	2.85757e+07	2.40416e+07	1.19871e+08	2.45707e+07	2.38707e+07	4.52557e+07	4.38094e+07	2.54786e+07	2.04802e+07	2.63472e+07	8.38684e+07	2.47927e+07	2.95223e+07	2.47979e+07	1.85444e+07	3.09257e+07	1.03982e+08	2.33161e+07	2.21661e+07	2.82547e+07	2.65813e+07	2.84953e+07	2.85416e+07
4978pos		PE(16:0p_16:0)+H	PE(32:0p)+H	PE	(16:0p_16:0)	(16:0p)	(16:0)			C37 H75 O7 N1 P1	676.528	682.251	0.0398848	1.18756	0.537649	0.0657397	2.83649e+07	9.19793e+06	2.33855e+07	2.46118e+07	1.66594e+07	8.15658e+06	2.8767e+07	1.82071e+07	1.70226e+07	2.92119e+07	3.41723e+07	1.32749e+07	1.46415e+07	1.64359e+07	3.01128e+07	2.33343e+07	3.15531e+07	1.38222e+07	2.0411e+07	2.12338e+07	3.63742e+07	1.5499e+07	1.65451e+07	1.83789e+07	1.45103e+07	1.55719e+07	1.55499e+07
497neg		LPC(16:0)-CH3	LPC(16:0)-CH3	LPC	(16:0)	(16:0)				C23 H47 O7 N1 P1	480.31	108.387	0.00256924	0.845986	0.243627	0.693345	7.62345e+07	7.22482e+07	8.01417e+07	6.30177e+07	8.51849e+07	1.01251e+08	4.26058e+07	7.75571e+07	7.22571e+07	9.72415e+07	6.74441e+07	4.83133e+07	8.51265e+07	4.83856e+07	5.93679e+07	6.85168e+07	7.32187e+07	6.71628e+07	6.60233e+07	6.81325e+07	5.17315e+07	5.77271e+07	5.85299e+07	9.40116e+07	5.85679e+07	5.87345e+07	5.88691e+07
4982pos		PE(28:0_6:0)+Na	PE(34:0)+Na	PE	(28:0_6:0)	(28:0)	(6:0)			C39 H78 O8 N1 P1 Na1	742.536	602.556	0.0189839	1.5196	0.00286245	0.7145	1.16741e+08	5.52521e+07	1.4251e+08	1.26763e+08	1.01141e+08	6.34163e+07	1.07154e+08	1.27445e+08	1.16814e+08	1.06943e+08	1.06354e+08	8.61159e+07	9.97393e+07	1.01292e+08	9.88626e+07	1.15016e+08	1.33087e+08	1.31502e+08	9.44706e+07	1.23482e+08	1.55761e+08	1.26887e+08	1.29616e+08	1.34314e+08	1.01385e+08	1.0474e+08	1.04844e+08
4988pos		PE(12:0p_22:0)+H	PE(34:0p)+H	PE	(12:0p_22:0)	(12:0p)	(22:0)			C39 H79 O7 N1 P1	704.559	699.813	0.0577061	1.06739	0.584173	0.185081	2.05895e+07	2.33404e+07	1.7196e+07	4.36484e+07	4.31443e+07	2.98703e+07	3.51886e+07	4.34234e+07	4.41154e+07	4.31374e+07	3.31484e+07	2.61726e+07	2.9724e+07	2.05248e+07	2.44063e+07	2.83699e+07	2.73563e+07	3.67655e+07	3.75077e+07	4.02238e+07	3.19007e+07	3.68851e+07	3.81665e+07	5.2909e+07	1.98603e+07	2.05499e+07	2.22039e+07
498pos		Cer(d18:1_24:1)+H	Cer(d42:2)+H	Cer	(d18:1_24:1)	(d18:1)	(24:1)			C42 H82 O3 N1	648.629	831.341	0.039053	1.44295	0.114084	0.984482	5.95675e+08	3.48561e+08	3.51034e+08	1.05764e+09	3.35933e+08	3.2326e+08	5.49748e+08	4.62965e+08	4.50724e+08	4.17382e+08	4.98912e+08	3.42342e+08	3.43919e+08	4.31711e+08	3.55184e+08	3.59565e+08	6.70426e+08	6.59884e+08	6.46391e+08	3.49138e+08	9.6104e+08	6.126e+08	4.4269e+08	7.22025e+08	3.35034e+08	3.58776e+08	3.58756e+08
4990pos		PE(18:0p_16:0)+H	PE(34:0p)+H	PE	(18:0p_16:0)	(18:0p)	(16:0)			C39 H79 O7 N1 P1	704.559	754.44	0.047113	1.234	0.268921	0.0807853	3.55851e+07	2.54946e+07	2.85401e+07	3.8454e+07	2.24757e+07	2.58508e+07	2.61755e+07	4.85989e+07	3.58492e+07	2.84896e+07	2.87416e+07	2.50703e+07	3.22467e+07	2.60197e+07	2.3389e+07	2.81498e+07	3.03649e+07	3.98823e+07	5.49988e+07	4.0792e+07	2.42316e+07	3.70924e+07	4.30041e+07	4.9979e+07	2.19433e+07	2.38359e+07	2.38381e+07
4994pos		PE(16:0_18:1)+Na	PE(34:1)+Na	PE	(16:0_18:1)	(16:0)	(18:1)			C39 H76 O8 N1 P1 Na1	740.52	592.427	0.0378515	1.20775	0.730239	0.212399	6.73087e+06	6.03762e+06	6.17746e+06	7.64985e+07	6.8577e+07	4.20063e+07	5.04348e+06	6.87168e+07	5.0029e+06	7.17501e+06	9.38667e+07	5.40844e+06	9.21285e+06	5.87171e+06	7.70982e+06	7.98599e+06	1.11041e+07	7.61855e+07	7.63062e+07	5.26115e+06	1.13738e+07	7.88913e+07	3.82513e+06	6.86406e+07	4.5547e+06	4.80353e+06	4.46733e+06
499pos		Cer(d18:2_24:0)+H	Cer(d42:2)+H	Cer	(d18:2_24:0)	(d18:2)	(24:0)			C42 H82 O3 N1	648.629	873.06	0.0755685	1.3425	0.0559549	0.27228	1.3736e+08	9.23502e+07	5.90296e+07	1.64567e+08	6.28676e+07	6.91697e+07	1.05241e+08	9.43412e+07	9.41569e+07	9.23553e+07	1.05966e+08	8.44405e+07	9.63569e+07	7.69262e+07	8.04855e+07	7.59265e+07	1.44215e+08	1.32555e+08	1.23814e+08	7.6138e+07	1.54714e+08	1.3367e+08	9.31716e+07	1.39044e+08	7.38155e+07	7.43252e+07	8.41975e+07
4neg		CL(68:3)-H	CL(68:3)-H	CL	(68:3)	(68:3)				C77 H143 O17 P2	1401.98	1002.54	0.0103596	0.641078	0.10101	0.450799	3.51226e+06	3.2801e+06	3.47225e+06	6.02469e+06	3.85487e+06	8.91259e+06	3.35758e+06	2.47477e+06	6.3894e+06	6.19544e+06	2.61871e+06	4.39234e+06	5.36615e+06	5.11723e+06	2.48312e+06	5.78844e+06	5.17514e+06	3.27361e+06	3.45467e+06	5.87657e+06	2.99484e+06	2.69167e+06	2.48898e+06	1.82403e+06	3.44928e+06	3.51187e+06	3.51196e+06
5011pos		PE(16:0p_18:1)+H	PE(34:1p)+H	PE	(16:0p_18:1)	(16:0p)	(18:1)			C39 H77 O7 N1 P1	702.543	696.84	0.0643395	1.23033	0.195955	0.1552	2.09802e+08	1.2554e+08	1.23544e+08	4.03418e+08	1.69568e+08	7.96117e+07	2.89519e+08	1.59349e+08	1.48076e+08	1.37583e+08	3.49548e+08	1.27181e+08	1.27908e+08	1.41306e+08	1.77462e+08	1.64042e+08	3.11683e+08	1.48309e+08	1.69636e+08	2.44984e+08	2.51658e+08	1.50533e+08	1.57726e+08	1.50269e+08	1.28063e+08	1.43061e+08	1.43865e+08
5025pos		PE(16:1e_18:1)+H	PE(34:2e)+H	PE	(16:1e_18:1)	(16:1e)	(18:1)			C39 H77 O7 N1 P1	702.543	115.56	0.127317	2.33437	0.078703	0.256302	3.02779e+06	2.17788e+06	6.77628e+06	7.98767e+06	5.40261e+06	8.45442e+06	6.50911e+06	8.50967e+06	1.1832e+07	2.52906e+06	3.82157e+06	2.05532e+06	3.49278e+06	7.44398e+06	3.68598e+06	8.85497e+06	1.06778e+07	6.20622e+06	8.00211e+06	8.13469e+06	2.18678e+07	7.94716e+06	1.87893e+07	2.32906e+07	9.62818e+06	9.63834e+06	1.19261e+07
5029pos		PE(16:0e_18:2)+H	PE(34:2e)+H	PE	(16:0e_18:2)	(16:0e)	(18:2)			C39 H77 O7 N1 P1	702.543	642.961	0.135775	1.6336	0.0029698	0.50064	2.07532e+07	6.78613e+07	1.98088e+07	3.66295e+07	4.12677e+07	3.3259e+07	1.16073e+07	9.65082e+07	7.60081e+07	5.29963e+07	1.27501e+07	4.73679e+07	7.63059e+07	4.69095e+07	1.59685e+07	8.37204e+07	2.06626e+07	7.58242e+07	3.66909e+07	6.26737e+07	7.89051e+07	5.38395e+07	7.51145e+07	9.42192e+07	2.44262e+07	3.15678e+07	3.08398e+07
5035pos		PE(16:0p_18:2)+H	PE(34:2p)+H	PE	(16:0p_18:2)	(16:0p)	(18:2)			C39 H75 O7 N1 P1	700.528	633.717	0.0349092	1.21621	0.0894327	0.232549	1.46791e+08	9.72102e+07	1.87782e+08	1.47601e+08	1.48809e+08	9.91737e+07	1.60502e+08	1.8902e+08	1.71566e+08	1.48275e+08	1.79093e+08	1.41888e+08	1.44963e+08	1.42521e+08	1.3877e+08	1.56432e+08	1.91202e+08	1.58908e+08	1.85476e+08	1.45187e+08	1.52417e+08	1.63458e+08	1.89537e+08	1.83775e+08	1.3688e+08	1.45923e+08	1.38137e+08
5043pos		PE(17:0_18:1)+Na	PE(35:1)+Na	PE	(17:0_18:1)	(17:0)	(18:1)			C40 H78 O8 N1 P1 Na1	754.536	624.178	0.0239	1.31119	0.0680007	0.250919	7.40996e+07	3.35628e+07	8.74749e+07	5.28547e+07	5.60342e+07	2.76491e+07	4.01328e+07	7.536e+07	4.79944e+07	5.62504e+07	6.21368e+07	3.61421e+07	4.79208e+07	4.87621e+07	4.89505e+07	5.34111e+07	7.90681e+07	5.7744e+07	4.87043e+07	5.54392e+07	4.62505e+07	5.53806e+07	5.60803e+07	6.15646e+07	4.83634e+07	5.05503e+07	4.87069e+07
5051pos		PE(35:3)+Na	PE(35:3)+Na	PE	(35:3)	(35:3)				C40 H74 O8 N1 P1 Na1	750.504	529.825	0.014681	0.959692	0.84008	0.144546	1.87139e+07	8.69516e+06	1.97473e+07	9.84012e+06	1.30084e+07	1.83506e+07	4.37643e+06	1.80758e+07	1.24973e+07	1.3704e+07	1.29093e+07	7.1676e+06	1.12513e+07	8.793e+06	6.30683e+06	1.35621e+07	1.79348e+07	1.12116e+07	1.15772e+07	1.40851e+07	5.06606e+06	1.09737e+07	1.30021e+07	1.71313e+07	1.0224e+07	1.04862e+07	1.02239e+07
5061pos		PE(18:0_18:1)+Na	PE(36:1)+Na	PE	(18:0_18:1)	(18:0)	(18:1)			C41 H80 O8 N1 P1 Na1	768.551	621.9	0.06346	1.34663	0.103662	0.339478	4.5501e+07	5.02736e+07	5.68038e+07	7.15614e+07	7.11502e+07	4.52822e+07	2.21437e+07	9.08746e+07	8.01124e+07	6.9269e+07	4.08096e+07	4.46235e+07	6.35004e+07	5.11521e+07	1.94784e+08	6.14473e+07	5.05706e+07	1.11862e+08	6.71e+07	1.19898e+08	4.09416e+07	7.40216e+07	8.70204e+07	7.56328e+07	4.9004e+07	4.95051e+07	5.48569e+07
5064pos		PE(18:0_18:1)+Na	PE(36:1)+Na	PE	(18:0_18:1)	(18:0)	(18:1)			C41 H80 O8 N1 P1 Na1	768.551	722.352	0.0478737	1.06575	0.631604	0.21359	5.63231e+07	5.75249e+07	4.27022e+07	6.28145e+07	4.0079e+07	4.85064e+07	5.76087e+07	4.17529e+07	4.157e+07	4.43293e+07	6.70256e+07	4.51764e+07	4.18642e+07	3.81831e+07	5.70342e+07	4.0445e+07	6.27902e+07	3.94943e+07	4.37612e+07	4.1307e+07	6.07269e+07	7.29776e+07	4.09309e+07	4.86509e+07	3.81952e+07	3.90506e+07	4.18297e+07
5078pos		PE(36:1e)+H	PE(36:1e)+H	PE	(36:1e)	(36:1e)				C41 H83 O7 N1 P1	732.59	715.436	0.0411606	1.51676	0.0229873	0.320124	9.01942e+06	1.25622e+07	5.43298e+06	1.44505e+07	1.93569e+07	1.54093e+07	5.58344e+06	3.44033e+07	2.32364e+07	2.00695e+07	7.96593e+06	1.30287e+07	2.67599e+07	1.21809e+07	5.66632e+06	1.46885e+07	7.28592e+06	2.52925e+07	1.63085e+07	2.55018e+07	1.30446e+07	2.22111e+07	2.50129e+07	3.48601e+07	1.17965e+07	1.20103e+07	1.27523e+07
5081pos		PE(36:1e)+H	PE(36:1e)+H	PE	(36:1e)	(36:1e)				C41 H83 O7 N1 P1	732.59	816.701	0.0403039	1.19127	0.282365	0.0904394	1.09125e+07	9.16301e+06	9.4006e+06	8.20611e+06	8.70627e+06	9.94348e+06	6.1181e+07	1.76843e+07	1.35457e+07	1.4978e+07	7.14541e+06	1.38042e+07	1.45776e+07	9.30295e+06	7.28902e+06	1.22587e+07	8.78507e+06	1.64066e+07	1.82564e+07	9.79197e+06	8.35116e+06	1.47498e+07	1.73985e+07	2.05681e+07	7.87763e+06	8.45173e+06	8.45703e+06
5082pos		PE(18:0p_18:1)+H	PE(36:1p)+H	PE	(18:0p_18:1)	(18:0p)	(18:1)			C41 H81 O7 N1 P1	730.575	762.008	0.0467664	1.22603	0.0750402	0.0684854	1.02036e+08	9.27184e+07	7.93483e+07	5.19602e+08	7.10548e+07	6.63324e+07	2.69254e+08	8.40979e+07	8.07814e+07	7.55291e+07	1.03908e+08	8.83802e+07	9.38523e+07	9.21173e+07	9.58337e+07	9.76991e+07	1.60287e+08	1.19941e+08	9.56701e+07	3.05802e+08	1.28209e+08	9.05108e+07	8.37562e+07	1.11127e+08	7.87448e+07	8.55097e+07	8.54649e+07
5096pos		PE(36:2e)+Na	PE(36:2e)+Na	PE	(18:0e_18:2)	(18:0e)	(18:2)			C41 H80 O7 N1 P1 Na1	752.556	765.749	0.0330525	1.14793	0.304449	0.0727037	1.50825e+07	1.86902e+07	1.24688e+07	4.73842e+07	1.24029e+07	6.98451e+06	3.2345e+07	1.28616e+07	1.48346e+07	1.30158e+07	1.49861e+07	1.62618e+07	1.59669e+07	1.66427e+07	1.57565e+07	1.35228e+07	2.12781e+07	1.57315e+07	1.25138e+07	3.49614e+07	1.86498e+07	1.42248e+07	1.42491e+07	1.26813e+07	1.2862e+07	1.36295e+07	1.36256e+07
5102pos		PE(18:0p_18:2)+H	PE(36:2p)+H	PE	(18:0p_18:2)	(18:0p)	(18:2)			C41 H79 O7 N1 P1	728.559	703.16	0.053866	1.24992	0.173474	0.536249	4.44574e+08	5.35948e+08	5.50551e+08	4.89297e+08	5.68722e+08	5.82396e+08	6.35029e+08	8.99254e+08	6.10977e+08	4.68709e+08	5.60166e+08	4.57175e+08	5.61961e+08	4.04366e+08	4.63376e+08	4.42314e+08	4.18882e+08	7.49785e+08	8.00146e+08	6.09659e+08	3.85879e+08	7.65366e+08	9.03838e+08	8.52868e+08	3.97132e+08	4.42189e+08	4.24332e+08
5113pos		PE(25:1_11:2)+Na	PE(36:3)+Na	PE	(25:1_11:2)	(25:1)	(11:2)			C41 H76 O8 N1 P1 Na1	764.52	538.8	0.00902591	1.30313	0.0551761	0.487819	2.95271e+08	1.64562e+08	2.97865e+08	2.30109e+08	2.15499e+08	2.78465e+08	1.619e+08	2.89637e+08	2.93807e+08	2.79451e+08	2.1067e+08	1.44581e+08	2.10214e+08	1.97211e+08	2.61816e+08	2.68215e+08	3.00153e+08	3.19755e+08	2.44676e+08	2.73973e+08	3.43258e+08	3.16175e+08	2.50523e+08	3.0472e+08	2.23198e+08	2.25048e+08	2.21025e+08
5118pos		PE(18:1_18:2)+H	PE(36:3)+H	PE	(18:1_18:2)	(18:1)	(18:2)			C41 H77 O8 N1 P1	742.538	605.627	0.0393288	1.04659	0.719065	0.566544	5.34422e+08	2.13205e+08	6.69353e+08	3.94573e+08	4.04792e+08	3.52207e+08	5.14861e+08	3.41933e+08	3.17788e+08	5.137e+08	4.84265e+08	3.31584e+08	3.55414e+08	3.14256e+08	5.67352e+08	3.22302e+08	6.70523e+08	3.80106e+08	3.76479e+08	3.66851e+08	4.80031e+08	4.07129e+08	3.29473e+08	3.65158e+08	3.21516e+08	3.44271e+08	3.44642e+08
511pos		Cer(d18:2_24:1)+H	Cer(d42:3)+H	Cer	(d18:2_24:1)	(d18:2)	(24:1)			C42 H80 O3 N1	646.613	783.388	0.0653609	1.3081	0.307272	0.456956	2.91314e+08	1.66882e+08	1.4445e+08	4.31246e+08	1.56159e+08	1.59424e+08	3.11574e+08	1.74761e+08	1.54122e+08	1.49694e+08	2.17265e+08	1.41329e+08	1.46789e+08	1.46167e+08	1.48859e+08	1.5207e+08	3.41875e+08	2.88302e+08	2.62941e+08	1.48145e+08	4.28675e+08	1.7159e+08	1.4564e+08	2.95064e+08	1.30796e+08	1.43139e+08	1.48809e+08
5121pos		PE(18:1_18:2)+H	PE(36:3)+H	PE	(18:1_18:2)	(18:1)	(18:2)			C41 H77 O8 N1 P1	742.538	715.26	0.0552922	1.07094	0.56636	0.0554488	8.26501e+06	4.78362e+06	6.50578e+06	4.60441e+06	5.07692e+06	2.886e+06	7.64783e+06	4.3806e+06	4.92678e+06	5.08099e+06	9.03924e+06	4.38801e+06	4.4541e+06	3.67273e+06	8.07845e+06	4.93523e+06	7.16693e+06	3.75414e+06	4.11358e+06	4.12497e+06	6.61852e+06	4.45333e+06	4.53627e+06	4.57407e+06	4.0616e+06	4.08838e+06	4.47743e+06
5148pos		PE(18:1p_18:2)+H	PE(36:3p)+H	PE	(18:1p_18:2)	(18:1p)	(18:2)			C41 H77 O7 N1 P1	726.543	637.562	0.0354429	1.35125	0.127634	0.298284	1.05282e+08	4.22588e+07	1.01486e+08	8.41449e+07	7.38311e+07	2.50158e+07	9.1289e+07	6.85005e+07	6.9083e+07	7.4184e+07	1.08066e+08	5.13617e+07	6.92161e+07	5.7455e+07	5.57647e+07	1.02538e+08	9.56805e+07	8.33946e+07	9.27812e+07	8.06074e+07	1.06725e+08	9.84325e+07	5.94152e+07	8.90865e+07	5.62353e+07	5.98283e+07	5.98415e+07
516neg		LPC(16:0e)+HCOO	LPC(16:0e)+HCOO	LPC	(16:0e)	(16:0e)				C25 H53 O8 N1 P1	526.351	128.76	0.0107814	1.09012	0.652286	0.477054	9.41418e+06	1.74323e+07	6.13113e+06	9.25533e+06	1.50302e+07	2.13556e+07	6.16817e+06	1.82276e+07	1.34882e+07	1.69993e+07	7.65863e+06	5.91347e+06	2.13373e+07	6.80752e+06	6.89157e+06	1.64062e+07	5.4295e+06	1.70888e+07	1.06509e+07	1.4062e+07	1.01156e+07	1.16376e+07	1.68493e+07	1.65285e+07	1.01305e+07	1.03222e+07	1.03218e+07
5174pos		PE(36:4)+Na	PE(36:4)+Na	PE	(18:2_18:2)	(18:2)	(18:2)			C41 H74 O8 N1 P1 Na1	762.504	502.212	0.00345101	1.1658	0.39469	0.219613	2.42977e+08	6.51576e+07	2.66032e+08	1.38436e+08	1.00263e+08	1.2934e+08	1.14897e+08	1.55986e+08	1.40562e+08	8.20513e+07	2.639e+08	6.41611e+07	1.24016e+08	1.20517e+08	1.34022e+08	1.7244e+08	3.22334e+08	1.05753e+08	1.10721e+08	1.59685e+08	5.55917e+07	1.01288e+08	1.00533e+08	1.62833e+08	1.31183e+08	1.31186e+08	1.3197e+08
5179pos		PE(36:4)+Na	PE(36:4)+Na	PE	(36:4)	(36:4)				C41 H74 O8 N1 P1 Na1	762.504	589.726	0.0472643	1.07334	0.556133	0.0994015	1.21106e+07	1.31047e+07	1.33536e+07	1.62391e+07	1.00712e+07	1.4149e+07	1.78878e+07	1.04337e+07	1.36279e+07	1.17058e+07	8.1582e+06	1.32037e+07	1.21299e+07	1.45508e+07	1.68426e+07	1.38215e+07	1.29583e+07	1.0874e+07	1.07371e+07	1.3146e+07	1.93072e+07	1.30251e+07	1.25532e+07	1.42848e+07	1.56751e+07	1.44321e+07	1.44861e+07
517neg		LPC(16:1)+HCOO	LPC(16:1)+HCOO	LPC	(16:1)	(16:1)				C25 H49 O9 N1 P1	538.315	86.4436	0.0141451	0.67724	0.0542009	0.960786	3.26199e+07	2.35041e+07	3.19648e+07	2.75653e+07	2.91603e+07	3.02677e+07	2.02037e+07	2.20979e+07	2.21011e+07	3.83228e+07	2.94369e+07	1.4071e+07	2.43475e+07	1.71844e+07	2.74813e+07	2.58093e+07	2.74555e+07	1.51439e+07	2.20245e+07	2.69996e+07	1.57452e+07	1.73613e+07	1.18681e+07	3.19182e+07	2.0022e+07	2.0022e+07	2.05166e+07
518neg		LPC(16:1e)+HCOO	LPC(16:1e)+HCOO	LPC	(16:1e)	(16:1e)				C25 H51 O8 N1 P1	524.336	138.328	0.00386883	0.965092	0.846279	0.133348	8.19103e+07	9.59091e+07	7.58137e+07	5.44881e+07	7.14988e+07	7.26899e+07	3.99104e+07	8.24381e+07	7.6201e+07	6.63369e+07	7.29474e+07	3.60682e+07	9.23929e+07	3.71837e+07	4.65584e+07	6.51972e+07	7.68006e+07	8.10288e+07	8.29805e+07	5.86534e+07	2.8764e+07	5.69477e+07	6.90592e+07	9.33854e+07	5.62927e+07	5.62927e+07	5.66707e+07
5195pos		PE(18:2p_18:2)+H	PE(36:4p)+H	PE	(18:2p_18:2)	(18:2p)	(18:2)			C41 H75 O7 N1 P1	724.528	620.8	0.0238108	1.38452	0.0395992	0.97511	6.36996e+08	5.35513e+08	6.32987e+08	1.07419e+09	5.99753e+08	3.86789e+08	1.27532e+09	8.27913e+08	6.78121e+08	7.34979e+08	9.00404e+08	6.07006e+08	6.32828e+08	8.28448e+08	7.07159e+08	7.2928e+08	6.73315e+08	8.68152e+08	7.28142e+08	6.68826e+08	1.19177e+09	7.86561e+08	6.66235e+08	6.44145e+08	6.61753e+08	6.93582e+08	6.73421e+08
519pos		Cer(d18:2_24:2)+H	Cer(d42:4)+H	Cer	(d18:2_24:2)	(d18:2)	(24:2)			C42 H78 O3 N1	644.598	730.439	0.0643437	1.56053	0.208832	0.211953	9.54682e+06	6.06325e+06	7.01251e+06	2.43445e+07	1.13839e+07	6.10029e+06	2.41803e+07	6.19713e+06	7.54108e+06	7.92824e+06	2.18907e+07	6.71684e+06	2.6065e+07	9.95434e+06	1.4154e+07	5.39271e+06	1.49496e+07	1.37742e+07	1.54971e+07	1.19465e+07	2.18959e+07	9.39304e+06	6.45905e+06	1.28371e+07	7.47612e+06	8.35297e+06	8.39759e+06
5213pos		PE(36:6)+H	PE(36:6)+H	PE	(36:6)	(36:6)				C41 H71 O8 N1 P1	736.491	494.725	0.00575745	1.06387	0.753372	0.0521565	6.04331e+06	5.07752e+06	5.8735e+06	6.53802e+06	8.51458e+06	8.64463e+06	2.21056e+06	1.03038e+07	8.91033e+06	5.18039e+06	7.21178e+06	3.94939e+06	5.97073e+06	5.81493e+06	2.61569e+06	7.19983e+06	9.20171e+06	4.64149e+06	8.50309e+06	6.58044e+06	4.72869e+06	7.2707e+06	9.50074e+06	1.03123e+07	5.38068e+06	5.40541e+06	5.44255e+06
5214pos		PE(14:0p_22:6)+H	PE(36:6p)+H	PE	(14:0p_22:6)	(14:0p)	(22:6)			C41 H71 O7 N1 P1	720.496	521.576	0.0168683	0.90018	0.637917	0.200423	2.3653e+07	1.45712e+07	2.15055e+07	1.72895e+07	2.05989e+07	3.18307e+07	7.7184e+06	1.48919e+07	2.62877e+07	1.14242e+07	2.0516e+07	8.45622e+06	1.47276e+07	2.00693e+07	1.0103e+07	1.90154e+07	2.814e+07	1.88392e+07	1.83019e+07	1.88748e+07	1.05512e+07	1.76194e+07	1.80545e+07	2.89512e+07	1.56891e+07	1.52349e+07	1.56886e+07
5221pos		PE(37:2)+Na	PE(37:2)+Na	PE	(37:2)	(37:2)				C42 H80 O8 N1 P1 Na1	780.551	649.724	0.0582197	1.42525	0.0997411	0.237107	2.36428e+07	2.1007e+07	2.82119e+07	2.24424e+07	2.2712e+07	2.38403e+07	5.40207e+06	4.69702e+07	3.73793e+07	2.30224e+07	1.4914e+07	2.67215e+07	2.76488e+07	1.86788e+07	1.07172e+07	3.02599e+07	2.38595e+07	5.30636e+07	3.73771e+07	4.97303e+07	1.77889e+07	3.03283e+07	4.4658e+07	4.90778e+07	2.18176e+07	2.43687e+07	2.24308e+07
5224pos		PE(37:2e)+H	PE(37:2e)+H	PE	(37:2e)	(37:2e)				C42 H83 O7 N1 P1	744.59	670.802	0.0486912	1.26488	0.296091	0.344528	8.59231e+08	5.77564e+08	9.21088e+08	1.08218e+09	5.61532e+08	3.56511e+08	9.65906e+08	4.82068e+08	4.65747e+08	4.52337e+08	1.62454e+09	5.4457e+08	5.25953e+08	1.24033e+09	5.76116e+08	5.14591e+08	1.50651e+09	5.51986e+08	6.25352e+08	4.39928e+08	1.24435e+09	5.86425e+08	5.52941e+08	5.63474e+08	5.04683e+08	5.49871e+08	5.49692e+08
5226pos		PE(23:1_14:2)+Na	PE(37:3)+Na	PE	(23:1_14:2)	(23:1)	(14:2)			C42 H78 O8 N1 P1 Na1	778.536	590.742	0.0981071	1.26388	0.167135	0.245368	1.18774e+08	2.788e+07	1.31937e+08	4.85942e+07	5.09562e+07	3.45327e+07	2.85962e+07	6.70086e+07	4.67292e+07	4.40111e+07	9.4676e+07	3.04959e+07	5.04572e+07	4.09512e+07	4.59954e+07	4.65948e+07	1.05299e+08	5.06954e+07	4.32492e+07	5.15987e+07	2.33541e+07	5.20562e+07	4.85426e+07	6.32889e+07	4.36977e+07	4.42669e+07	5.18885e+07
522pos		Cer(d18:2_24:2)+H	Cer(d42:4)+H	Cer	(d18:2_24:2)	(d18:2)	(24:2)			C42 H78 O3 N1	644.598	848.708	0.0399478	1.24913	0.185321	0.328437	3.12629e+08	2.32036e+08	2.48883e+08	2.63097e+08	2.52111e+08	1.95987e+08	1.01955e+08	4.52855e+08	4.86871e+08	3.89291e+08	2.48129e+08	2.49052e+08	2.6259e+08	2.52945e+08	2.1864e+08	2.44626e+08	2.80817e+08	3.97652e+08	4.05596e+08	2.51514e+08	2.43312e+08	3.72411e+08	4.24768e+08	5.22359e+08	2.34754e+08	2.5175e+08	2.51814e+08
523neg		LPC(17:0)+HCOO	LPC(17:0)+HCOO	LPC	(17:0)	(17:0)				C26 H53 O9 N1 P1	554.346	121.594	0.00136457	1.00164	0.990955	0.314508	3.51312e+07	2.50605e+07	3.3577e+07	1.98793e+07	2.44502e+07	2.87929e+07	1.72877e+07	3.09301e+07	2.33199e+07	3.20962e+07	2.59548e+07	1.23479e+07	2.84424e+07	1.39988e+07	2.38327e+07	2.07182e+07	3.04501e+07	2.43727e+07	2.20321e+07	2.34789e+07	1.74592e+07	2.18899e+07	2.19234e+07	3.15066e+07	1.97362e+07	1.97763e+07	1.97251e+07
5241pos		PE(27:1_11:0)+Na	PE(38:1)+Na	PE	(27:1_11:0)	(27:1)	(11:0)			C43 H84 O8 N1 P1 Na1	796.583	704.905	0.0615905	1.29566	0.182801	0.486097	2.43864e+08	2.08765e+08	2.31615e+08	3.99058e+08	4.0234e+08	2.30678e+08	1.9637e+08	4.0488e+08	3.2809e+08	2.57882e+08	2.78695e+08	2.21584e+08	2.42009e+08	1.84348e+08	2.51396e+08	1.85154e+08	2.4744e+08	4.88808e+08	4.54171e+08	3.91986e+08	2.59171e+08	4.41456e+08	4.6402e+08	3.87233e+08	2.15373e+08	2.42736e+08	2.23899e+08
5244pos		PE(28:1_10:1)+H	PE(38:2)+H	PE	(28:1_10:1)	(28:1)	(10:1)			C43 H83 O8 N1 P1	772.585	728.046	0.0624438	1.19551	0.299122	0.0488433	6.78214e+07	1.71013e+07	4.18023e+07	6.03847e+07	5.88332e+07	4.6412e+07	4.24224e+07	6.59239e+07	5.49794e+07	4.84437e+07	4.92162e+07	4.31135e+07	3.83891e+07	3.54884e+07	4.3611e+07	4.21276e+07	5.83885e+07	6.94419e+07	5.87873e+07	3.62039e+07	4.54414e+07	4.62867e+07	6.05223e+07	6.13874e+07	3.0149e+07	3.36128e+07	3.02995e+07
5246pos		PE(14:0e_24:2)+H	PE(38:2e)+H	PE	(14:0e_24:2)	(14:0e)	(24:2)			C43 H85 O7 N1 P1	758.606	781	0.0402502	1.66102	0.000376485	0.631694	3.11267e+07	3.32721e+07	2.48788e+07	4.67736e+07	2.92757e+07	3.80433e+07	1.38767e+07	6.27125e+07	6.96787e+07	4.80988e+07	2.68039e+07	3.41945e+07	6.21767e+07	3.09174e+07	1.79553e+07	3.61045e+07	2.56718e+07	7.25582e+07	3.85923e+07	6.5518e+07	4.39608e+07	6.45764e+07	6.18924e+07	8.42603e+07	2.70416e+07	2.92977e+07	2.80119e+07
524neg		LPC(17:1)+HCOO	LPC(17:1)+HCOO	LPC	(17:1)	(17:1)				C26 H51 O9 N1 P1	552.331	96.71	0.0211059	0.662549	0.193101	0.428446	6.83431e+06	5.55042e+06	6.41528e+06	4.18488e+06	7.72384e+06	8.58799e+06	1.49985e+06	6.72577e+06	4.43014e+06	8.6299e+06	4.25492e+06	1.56659e+07	5.58708e+06	1.56159e+06	3.52679e+06	4.38051e+06	4.8751e+06	4.11672e+06	3.82807e+06	5.04459e+06	1.04544e+07	2.88258e+06	3.35173e+06	7.11091e+06	3.7278e+06	3.88684e+06	3.82912e+06
524pos		Cer(d20:2_22:3)+H	Cer(d42:5)+H	Cer	(d20:2_22:3)	(d20:2)	(22:3)			C42 H76 O3 N1	642.582	796.145	0.105786	1.258	0.0994955	0.223943	2.0054e+08	1.5405e+08	1.72497e+08	1.64412e+08	1.60197e+08	1.55989e+08	1.60966e+08	2.73152e+08	2.16469e+08	1.91243e+08	1.48167e+08	1.32019e+08	1.61061e+08	1.62808e+08	1.55664e+08	1.57318e+08	1.8993e+08	2.65643e+08	1.81348e+08	1.40421e+08	1.5215e+08	1.80698e+08	1.93656e+08	2.8595e+08	1.33726e+08	1.62086e+08	1.61163e+08
5252pos		PE(20:0p_18:2)+H	PE(38:2p)+H	PE	(20:0p_18:2)	(20:0p)	(18:2)			C43 H83 O7 N1 P1	756.59	768.339	0.0501118	1.72891	0.00481715	0.996613	8.93423e+07	7.31741e+07	9.03266e+07	1.22469e+08	6.80954e+07	8.57203e+07	1.11568e+07	1.61269e+08	1.13974e+08	8.90229e+07	7.78182e+07	8.61819e+07	1.44398e+08	8.91834e+07	7.28295e+07	7.93955e+07	1.01744e+08	1.87234e+08	1.32979e+08	1.15794e+08	8.38256e+07	1.82283e+08	1.66257e+08	1.87707e+08	7.73185e+07	8.20364e+07	8.54633e+07
5259pos		PE(16:0_22:3)+Na	PE(38:3)+Na	PE	(16:0_22:3)	(16:0)	(22:3)			C43 H80 O8 N1 P1 Na1	792.551	642.622	0.0273264	0.976008	0.69817	5.34828	1.29638e+10	8.2947e+09	1.40668e+10	9.6979e+09	1.14259e+10	9.40854e+09	6.36233e+09	9.77551e+09	1.05308e+10	9.70723e+09	1.10398e+10	9.68642e+09	1.00964e+10	9.70207e+09	1.02029e+10	1.01872e+10	1.387e+10	9.70993e+09	9.70726e+09	9.95327e+09	7.41863e+09	1.00175e+10	9.81493e+09	1.05089e+10	9.37874e+09	9.87239e+09	9.47511e+09
525pos		Cer(d42:6)+H	Cer(d42:6)+H	Cer	(d42:6)	(d42:6)				C42 H74 O3 N1	640.566	724.983	0.0836965	0.996604	0.985672	0.118465	2.14575e+07	5.26896e+06	7.85602e+06	1.9125e+07	1.06329e+07	4.59759e+06	1.43626e+07	8.5214e+06	8.08054e+06	1.2875e+07	2.55295e+07	6.69744e+06	5.98356e+06	8.20949e+06	1.01142e+07	6.58365e+06	2.19535e+07	9.0337e+06	1.07186e+07	7.05529e+06	1.13017e+07	8.33973e+06	7.43794e+06	1.2614e+07	7.58706e+06	8.80245e+06	8.80674e+06
5260pos		PE(18:0_20:3)+H	PE(38:3)+H	PE	(18:0_20:3)	(18:0)	(20:3)			C43 H81 O8 N1 P1	770.569	683.64	0.0428268	1.19554	0.106616	0.158771	2.64425e+08	9.04282e+07	1.5222e+08	1.95315e+08	1.5353e+08	1.16876e+08	1.29632e+08	1.68255e+08	1.69427e+08	1.44895e+08	2.14278e+08	1.36298e+08	1.30972e+08	1.49059e+08	1.51003e+08	1.58023e+08	2.82801e+08	1.77212e+08	1.55144e+08	1.76953e+08	1.44412e+08	1.96001e+08	1.36201e+08	1.96425e+08	1.12678e+08	1.22016e+08	1.20791e+08
5277pos		PE(18:0_20:4)+Na	PE(38:4)+Na	PE	(18:0_20:4)	(18:0)	(20:4)			C43 H78 O8 N1 P1 Na1	790.536	576.96	0.0176325	1.17054	0.180088	0.83239	4.81904e+09	2.45805e+09	5.4341e+09	3.57311e+09	3.38203e+09	1.89063e+09	2.9355e+09	3.62479e+09	4.30452e+09	3.56674e+09	5.06196e+09	2.51491e+09	2.74447e+09	3.56302e+09	3.38689e+09	4.3461e+09	5.69052e+09	3.75987e+09	3.48807e+09	3.90217e+09	2.80206e+09	3.58867e+09	3.73095e+09	3.74735e+09	3.33122e+09	3.43354e+09	3.43653e+09
5278pos		PE(18:0_20:4)+H	PE(38:4)+H	PE	(18:0_20:4)	(18:0)	(20:4)			C43 H79 O8 N1 P1	768.554	581.117	0.0299516	1.40101	0.0593517	0.229302	2.93204e+07	1.32484e+07	3.86421e+07	3.17614e+07	2.58977e+07	1.39085e+07	1.76476e+07	3.33726e+07	2.57939e+07	2.33585e+07	2.8861e+07	1.86543e+07	1.61385e+07	2.91548e+07	1.87384e+07	3.25891e+07	4.04602e+07	3.37121e+07	3.11468e+07	3.15045e+07	3.03215e+07	3.05216e+07	3.27608e+07	3.05142e+07	2.28801e+07	2.29181e+07	2.41075e+07
5283pos		PE(38:4)+Na	PE(38:4)+Na	PE	(16:0_22:4)	(16:0)	(22:4)			C43 H78 O8 N1 P1 Na1	790.536	663.088	0.00380736	1.00491	0.801109	0.461927	9.19233e+07	8.35e+07	9.35139e+07	8.7191e+07	8.7122e+07	8.97913e+07	7.74877e+07	9.0366e+07	5.06679e+07	9.15605e+07	8.88724e+07	8.9097e+07	8.68834e+07	8.86243e+07	9.49575e+07	9.82753e+07	9.8331e+07	8.52104e+07	8.7184e+07	8.25884e+07	9.27489e+07	8.99609e+07	8.56799e+07	9.05228e+07	9.59186e+07	9.59458e+07	9.65658e+07
528neg		LPC(18:0)+HCOO	LPC(18:0)+HCOO	LPC	(18:0)	(18:0)				C27 H55 O9 N1 P1	568.362	152.968	0.0134226	1.03067	0.718419	4.28183	1.19395e+09	1.43428e+09	1.16343e+09	1.22815e+09	1.16978e+09	1.39089e+09	6.88551e+08	1.2713e+09	1.24807e+09	1.26442e+09	1.0753e+09	8.92141e+08	1.4261e+09	8.92206e+08	9.34509e+08	1.07789e+09	1.22119e+09	1.46931e+09	1.32163e+09	1.19266e+09	1.02456e+09	1.23379e+09	1.27727e+09	1.48873e+09	1.01739e+09	1.03319e+09	1.04499e+09
529neg		LPC(18:0)-CH3	LPC(18:0)-CH3	LPC	(18:0)	(18:0)				C25 H51 O7 N1 P1	508.341	152.968	0.00270672	1.0063	0.940717	0.756019	5.86502e+07	6.54892e+07	5.1871e+07	5.32998e+07	5.48384e+07	6.96377e+07	3.2045e+07	5.52441e+07	5.98694e+07	6.15193e+07	4.99614e+07	4.11878e+07	6.5539e+07	4.19456e+07	4.19988e+07	4.79512e+07	5.56249e+07	6.78132e+07	5.88948e+07	5.29413e+07	5.08096e+07	5.68672e+07	5.751e+07	6.77101e+07	4.58684e+07	4.60842e+07	4.58693e+07
5307pos		PE(16:0p_22:4)+H	PE(38:4p)+H	PE	(16:0p_22:4)	(16:0p)	(22:4)			C43 H79 O7 N1 P1	752.559	615.952	0.029542	1.51405	0.00541734	0.406227	2.16589e+07	2.25386e+07	2.56161e+07	4.03014e+07	3.29575e+07	3.43476e+07	2.20362e+07	4.67394e+07	5.16128e+07	1.72684e+07	2.81982e+07	2.33311e+07	3.81057e+07	4.27847e+07	1.81915e+07	2.39095e+07	3.41848e+07	4.46726e+07	3.47494e+07	4.13594e+07	3.05e+07	4.27585e+07	4.73339e+07	5.62966e+07	2.95752e+07	3.00364e+07	3.13041e+07
5309pos		PE(18:0p_20:4)+H	PE(38:4p)+H	PE	(18:0p_20:4)	(18:0p)	(20:4)			C43 H79 O7 N1 P1	752.559	692.16	0.0582886	1.38217	0.133188	1.52095	1.3864e+09	1.21202e+09	9.89688e+08	1.68717e+09	1.3581e+09	1.28692e+09	9.8991e+08	2.68951e+09	1.88972e+09	1.49456e+09	1.16564e+09	1.16434e+09	1.26301e+09	1.15829e+09	1.23761e+09	1.45658e+09	1.26167e+09	2.7981e+09	2.61622e+09	1.52093e+09	1.27505e+09	2.28601e+09	2.31047e+09	1.7909e+09	1.10172e+09	1.23723e+09	1.18701e+09
533pos		Cer(d18:1_25:0+O)+H-H2O	Cer(d43:1+O)+H-H2O	Cer	(d18:1_25:0+O)	(d18:1)	(25:0+O)			C43 H84 O3 N1	662.645	872.592	0.0321744	1.02389	0.896757	0.0823188	1.00578e+07	4.16877e+06	4.33557e+06	9.01513e+06	3.06636e+06	4.15858e+06	5.03646e+06	7.56989e+06	6.47066e+06	7.69563e+06	8.1381e+06	6.30415e+06	5.34137e+06	4.21309e+06	5.71941e+06	4.24e+06	9.59837e+06	6.04778e+06	7.51246e+06	4.7714e+06	6.33631e+06	5.04509e+06	3.3515e+06	9.87506e+06	4.03144e+06	4.26352e+06	4.266e+06
5343pos		PE(16:0p_22:5)+H	PE(38:5p)+H	PE	(16:0p_22:5)	(16:0p)	(22:5)			C43 H77 O7 N1 P1	750.543	647.723	0.0333647	1.50645	0.0637421	1.21934	2.21676e+08	2.30499e+08	2.20494e+08	5.08527e+08	4.16945e+08	2.76164e+08	1.65006e+08	5.14882e+08	5.11797e+08	3.04261e+08	2.78001e+08	2.14127e+08	3.3718e+08	3.4959e+08	1.66518e+08	4.55175e+08	2.33483e+08	7.53638e+08	5.62083e+08	6.00489e+08	3.7069e+08	5.01696e+08	5.40962e+08	5.39644e+08	2.79244e+08	2.88932e+08	2.98522e+08
5344pos		PE(16:0p_22:5)+H	PE(38:5p)+H	PE	(16:0p_22:5)	(16:0p)	(22:5)			C43 H77 O7 N1 P1	750.543	700.717	0.0369354	1.0756	0.584964	0.156675	1.27309e+07	1.63088e+07	1.27274e+07	1.10257e+07	1.65043e+07	1.49232e+07	6.18919e+06	1.92333e+07	1.34564e+07	1.148e+07	8.47343e+06	1.6686e+07	1.91865e+07	1.41087e+07	6.69668e+06	1.57353e+07	1.34388e+07	1.52648e+07	1.48198e+07	1.15543e+07	7.574e+06	1.6966e+07	1.93561e+07	1.79937e+07	1.48345e+07	1.48372e+07	1.58056e+07
5363pos		PE(38:6)+Na	PE(38:6)+Na	PE	(38:6)	(38:6)				C43 H74 O8 N1 P1 Na1	786.504	446.7	0.00275245	0.753829	0.32692	0.339484	2.38675e+07	2.1501e+07	1.51173e+07	2.82442e+07	1.70845e+07	4.72315e+07	1.27829e+07	1.94144e+07	2.61818e+07	1.53149e+07	1.19008e+07	1.72881e+07	1.48738e+07	1.33937e+07	1.13545e+07	3.18655e+07	2.76833e+07	2.04856e+07	1.64403e+07	2.16865e+07	8.60757e+06	2.06959e+07	1.75843e+07	2.50901e+07	1.48842e+07	1.49129e+07	1.49652e+07
536neg		LPC(18:0e)+HCOO	LPC(18:0e)+HCOO	LPC	(18:0e)	(18:0e)				C27 H57 O8 N1 P1	554.383	180.793	0.00964487	1.34117	0.148794	0.768223	2.11208e+06	1.03264e+07	824383	6.35472e+06	7.81074e+06	1.21802e+07	961966	1.31259e+07	9.10508e+06	8.55942e+06	1.28127e+06	3.8475e+06	1.44503e+07	4.12231e+06	1.52533e+06	8.77745e+06	1.47451e+06	1.21912e+07	5.9808e+06	8.50944e+06	6.43343e+06	7.71911e+06	1.14017e+07	1.32936e+07	5.92796e+06	5.92884e+06	6.02799e+06
5378pos		PE(38:6e)+H	PE(38:6e)+H	PE	(38:6e)	(38:6e)				C43 H77 O7 N1 P1	750.543	625.98	0.0255202	1.24071	0.152615	0.451872	6.66362e+08	4.86946e+08	6.45068e+08	7.81853e+08	7.11372e+08	4.59505e+08	7.49661e+08	1.09121e+09	9.10118e+08	9.17881e+08	9.5591e+08	6.39658e+08	7.07402e+08	7.2236e+08	5.81138e+08	8.1814e+08	7.19293e+08	9.63715e+08	1.01634e+09	7.43084e+08	8.29935e+08	9.22307e+08	7.35753e+08	7.62319e+08	6.66661e+08	6.96829e+08	6.97216e+08
537pos		Cer(d18:0_26:0)+H	Cer(d44:0)+H	Cer	(d18:0_26:0)	(d18:0)	(26:0)			C44 H90 O3 N1	680.692	968.084	0.04915	1.67439	0.413447	0.0753689	1.87739e+06	1.55201e+06	1.07531e+06	383676	723912	1.0421e+06	3.13288e+06	2.22366e+06	3.91769e+06	4.56529e+06	649704	2.52739e+06	2.29985e+06	1.39742e+06	3.31163e+06	1.63447e+06	858404	2.94865e+06	1.7756e+06	1.71479e+06	1.07548e+07	904442	1.27312e+06	1.5173e+06	2.08916e+06	2.2735e+06	2.28164e+06
5390pos		PE(16:0p_22:6)+H	PE(38:6p)+H	PE	(16:0p_22:6)	(16:0p)	(22:6)			C43 H75 O7 N1 P1	748.528	600.1	0.0380054	1.0518	0.512527	3.03154	6.68388e+09	4.94631e+09	9.12229e+09	6.83865e+09	5.97747e+09	5.26887e+09	4.64186e+09	6.67713e+09	7.57497e+09	5.75377e+09	8.62012e+09	6.11965e+09	5.30495e+09	5.87359e+09	6.40001e+09	6.9893e+09	9.05145e+09	6.45289e+09	7.69724e+09	5.89898e+09	6.87926e+09	5.94931e+09	6.35234e+09	7.20332e+09	5.29813e+09	5.70528e+09	5.42659e+09
539neg		LPC(18:1)+HCOO	LPC(18:1)+HCOO	LPC	(18:1)	(18:1)				C27 H53 O9 N1 P1	566.346	102.631	0.00377955	0.923492	0.545245	0.377485	6.48958e+08	5.57228e+08	7.21897e+08	5.39639e+08	6.1165e+08	6.55993e+08	2.64214e+08	6.39291e+08	5.33345e+08	6.20286e+08	5.61175e+08	3.83513e+08	6.83819e+08	3.56404e+08	4.74865e+08	5.03843e+08	6.53293e+08	5.36618e+08	5.2217e+08	5.47428e+08	3.11717e+08	4.70175e+08	4.52854e+08	6.95049e+08	4.49184e+08	4.5214e+08	4.49201e+08
539pos		Cer(d18:1_26:0)+H	Cer(d44:1)+H	Cer	(d18:1_26:0)	(d18:1)	(26:0)			C44 H88 O3 N1	678.676	952.116	0.0345568	1.39199	0.489242	0.0936434	1.06729e+07	7.55554e+06	6.51379e+06	1.06823e+07	4.86425e+06	4.8525e+06	1.19487e+07	1.00274e+07	1.39948e+07	1.83823e+07	8.81519e+06	9.98499e+06	1.09423e+07	9.21259e+06	1.84964e+07	1.11889e+07	1.15284e+07	1.04698e+07	8.9891e+06	9.0269e+06	3.46181e+07	4.08133e+06	5.90349e+06	9.42791e+06	9.36715e+06	9.9488e+06	9.95341e+06
540neg		LPC(18:1)-CH3	LPC(18:1)-CH3	LPC	(18:1)	(18:1)				C25 H49 O7 N1 P1	506.325	102.631	0.152101	0.813647	0.17942	0.678334	3.10173e+07	2.52782e+07	3.30155e+07	2.31602e+07	2.58926e+07	3.11507e+07	1.25279e+07	1.79258e+07	2.39936e+07	2.93718e+07	2.57067e+07	1.89467e+07	3.26628e+07	1.60134e+07	2.28932e+07	2.57621e+07	1.77094e+07	2.5542e+07	2.3993e+07	2.47738e+07	1.35057e+07	1.74087e+07	1.87717e+07	3.16991e+07	1.86451e+07	1.41393e+07	1.86706e+07
540pos		Cer(d44:4)+H	Cer(d44:4)+H	Cer	(d44:4)	(d44:4)				C44 H82 O3 N1	672.629	897.455	0.0253337	1.27636	0.213025	0.258609	1.66882e+08	1.10976e+08	1.00164e+08	1.38167e+08	1.22013e+08	7.21629e+07	5.91212e+07	2.03581e+08	2.4762e+08	2.27328e+08	1.22476e+08	1.27419e+08	1.54201e+08	1.20557e+08	1.26469e+08	1.19047e+08	1.42067e+08	2.21377e+08	2.19983e+08	1.21102e+08	2.1546e+08	2.07721e+08	1.20703e+08	1.26829e+08	1.19466e+08	1.25582e+08	1.21678e+08
5412pos		PE(16:1_22:6)+H	PE(38:7)+H	PE	(16:1_22:6)	(16:1)	(22:6)			C43 H73 O8 N1 P1	762.507	486.45	0.0152904	1.14666	0.3793	0.0333196	8.14817e+06	4.81361e+06	1.28693e+07	6.72684e+06	6.49268e+06	1.04782e+07	9.716e+06	6.86555e+06	9.54292e+06	9.03042e+06	6.69762e+06	5.21991e+06	5.81542e+06	5.99875e+06	8.90445e+06	8.5413e+06	7.9844e+06	8.53199e+06	5.71584e+06	1.07839e+07	8.99238e+06	9.86957e+06	7.799e+06	7.35946e+06	6.84458e+06	6.84492e+06	6.66506e+06
5413pos		PE(16:1_22:6)+H	PE(38:7)+H	PE	(16:1_22:6)	(16:1)	(22:6)			C43 H73 O8 N1 P1	762.507	514.68	0.0121402	1.03053	0.891987	0.139692	5.92564e+07	1.74315e+07	4.42269e+07	2.53226e+07	3.26139e+07	3.8645e+07	2.27964e+07	3.92435e+07	3.44509e+07	2.52887e+07	3.25114e+07	2.4843e+07	2.88476e+07	2.35003e+07	2.64271e+07	3.2132e+07	7.84932e+07	3.83701e+07	5.46694e+07	3.10022e+07	1.47255e+07	3.07622e+07	4.74502e+07	5.02164e+07	2.26854e+07	2.22151e+07	2.22148e+07
5414pos		PE(38:7)+H	PE(38:7)+H	PE	(38:7)	(38:7)				C43 H73 O8 N1 P1	762.507	544.015	0.0730131	1.13701	0.254358	0.025043	6.05275e+06	3.76085e+06	5.98208e+06	3.85363e+06	3.96091e+06	5.25594e+06	4.8443e+06	4.75392e+06	7.20936e+06	3.00748e+06	6.54876e+06	2.59622e+06	3.77489e+06	3.74259e+06	6.42963e+06	4.77417e+06	7.19481e+06	4.31303e+06	3.89293e+06	5.44299e+06	4.90807e+06	3.78229e+06	4.02126e+06	5.83846e+06	4.56144e+06	5.16659e+06	4.56663e+06
5419pos		PE(20:4e_18:3)+Na	PE(38:7e)+Na	PE	(20:4e_18:3)	(20:4e)	(18:3)			C43 H74 O7 N1 P1 Na1	770.51	595.078	0.0145039	0.971439	0.672742	0.469403	7.87641e+07	8.68605e+07	7.52504e+07	8.94579e+07	7.97458e+07	9.61206e+07	1.08678e+08	6.83905e+07	9.8339e+07	9.29667e+07	8.05229e+07	7.70739e+07	8.63002e+07	9.55286e+07	8.87399e+07	7.73502e+07	9.0356e+07	8.27557e+07	7.09631e+07	7.19449e+07	9.0192e+07	7.17197e+07	8.99858e+07	9.36382e+07	9.42301e+07	9.35731e+07	9.16319e+07
5424pos		PE(16:1p_22:6)+H	PE(38:7p)+H	PE	(16:1p_22:6)	(16:1p)	(22:6)			C43 H73 O7 N1 P1	746.512	543.017	0.0334846	1.23198	0.210031	0.0976488	2.89314e+07	1.79164e+07	4.08979e+07	2.80434e+07	3.04704e+07	1.59461e+07	4.68942e+06	3.60758e+07	3.31844e+07	2.71018e+07	3.83424e+07	1.42334e+07	2.47726e+07	2.7191e+07	1.58176e+07	2.71595e+07	3.41689e+07	3.02124e+07	3.30505e+07	2.91406e+07	2.11351e+07	3.28867e+07	2.58163e+07	3.14816e+07	2.92045e+07	2.9508e+07	2.77064e+07
542neg		LPC(18:1)-CH3	LPC(18:1)-CH3	LPC	(18:1)	(18:1)				C25 H49 O7 N1 P1	506.325	169.088	0.0215981	1.06848	0.78714	0.679231	5.32031e+07	4.08562e+07	4.82927e+07	3.94284e+07	5.76296e+07	8.13026e+07	1.9169e+07	5.71235e+07	3.84537e+07	4.2743e+07	3.11963e+07	1.91513e+07	5.82339e+07	3.05367e+07	3.00822e+07	5.51483e+07	6.62962e+07	5.56786e+07	2.2696e+07	4.86443e+07	2.34677e+07	4.13449e+07	4.66339e+07	6.92562e+07	3.70523e+07	3.56972e+07	3.57027e+07
542pos		Cer(d44:6)+H	Cer(d44:6)+H	Cer	(d44:6)	(d44:6)				C44 H78 O3 N1	668.598	797.155	0.0917974	1.20104	0.385121	0.208869	1.19566e+08	1.04314e+08	1.23372e+08	2.36882e+08	1.24854e+08	9.57031e+07	1.12771e+08	1.03366e+08	9.70163e+07	1.02423e+08	1.19735e+08	1.01054e+08	9.87732e+07	9.53258e+07	1.0334e+08	1.18012e+08	1.86178e+08	1.35411e+08	1.30408e+08	9.84623e+07	2.4649e+08	1.08554e+08	9.86005e+07	1.16836e+08	8.89849e+07	1.03066e+08	1.06072e+08
5430pos		PE(39:2)+Na	PE(39:2)+Na	PE	(39:2)	(39:2)				C44 H84 O8 N1 P1 Na1	808.583	577.549	0.0161196	1.1258	0.272529	1.50973	6.6319e+09	5.62257e+09	5.74899e+09	6.17208e+09	5.96223e+09	5.14435e+09	4.02479e+09	8.37896e+09	6.26926e+09	6.1336e+09	6.08093e+09	5.6789e+09	6.18898e+09	6.07865e+09	4.17237e+09	6.67527e+09	6.15287e+09	7.49677e+09	8.52009e+09	6.70412e+09	5.18725e+09	7.4403e+09	7.03182e+09	5.84326e+09	5.85357e+09	6.03346e+09	6.00223e+09
543pos		Cer(d18:1_26:6)+H	Cer(d44:7)+H	Cer	(d18:1_26:6)	(d18:1)	(26:6)			C44 H76 O3 N1	666.582	730.701	0.0793192	1.43432	0.448006	0.112344	8.5508e+06	1.14717e+06	5.11245e+06	1.12039e+07	8.32525e+06	1.67324e+06	1.90155e+07	5.03596e+06	6.35531e+06	4.28095e+06	1.70732e+07	3.10022e+06	1.2294e+06	6.14872e+06	1.20628e+07	1.78152e+06	1.00428e+07	5.15162e+06	5.51314e+06	5.17305e+06	1.48681e+07	4.49802e+06	3.69781e+06	4.80693e+06	4.10589e+06	4.7329e+06	4.72059e+06
5442pos		PE(39:3e)+Na	PE(39:3e)+Na	PE	(39:3e)	(39:3e)				C44 H84 O7 N1 P1 Na1	792.588	620.208	0.0283619	1.33591	0.231751	0.597758	2.00094e+08	3.95486e+08	2.32072e+08	4.08093e+08	4.641e+08	2.81358e+08	6.32714e+07	6.04472e+08	5.03666e+08	3.19301e+08	3.70842e+08	2.79055e+08	4.05948e+08	3.41182e+08	1.08249e+08	4.34362e+08	2.07576e+08	8.71765e+08	7.52659e+08	5.75442e+08	2.89116e+08	5.5566e+08	6.02079e+08	5.51442e+08	3.35993e+08	3.53128e+08	3.52986e+08
5446pos		PE(39:4)+H	PE(39:4)+H	PE	(39:4)	(39:4)				C44 H81 O8 N1 P1	782.569	1327.15	0.154949	3.44568	0.0823589	1.19607	820505	9.38971e+06	1.39756e+08	5.46142e+06	1.11945e+08	5.762e+06	3.86635e+06	3.78792e+08	1.83205e+07	1.62207e+08	1.33497e+08	373307	384561	3.462e+07	4.97069e+06	1.8139e+06	6.91059e+07	3.25148e+07	2.29192e+07	2.16862e+08	1.50904e+08	2.33106e+08	2.81403e+08	1.97547e+08	7.03205e+07	9.54882e+07	7.99931e+07
5462pos		PE(40:3e)+Na	PE(40:3e)+Na	PE	(40:3e)	(40:3e)				C45 H86 O7 N1 P1 Na1	806.603	784.284	0.0487462	2.12993	0.0150792	0.84404	1.49726e+07	4.32342e+07	9.80906e+06	5.26038e+07	3.15953e+07	3.92712e+07	4.55711e+07	7.70099e+07	6.40781e+07	3.26511e+07	3.74687e+07	3.36267e+07	8.31325e+07	3.11e+07	1.30488e+07	3.7777e+07	1.55051e+07	1.44024e+08	5.99466e+07	7.13685e+07	3.07225e+07	8.25748e+07	9.44115e+07	1.02666e+08	3.1363e+07	3.41685e+07	3.41694e+07
5464pos		PE(40:4)+H	PE(40:4)+H	PE	(40:4)	(40:4)				C45 H83 O8 N1 P1	796.585	729.78	0.071835	1.19951	0.251736	0.196015	7.48014e+07	6.84819e+07	7.74058e+07	7.75303e+07	9.45395e+07	6.46518e+07	5.65566e+07	6.19604e+07	8.15436e+07	6.25133e+07	5.38356e+07	5.0477e+07	7.07931e+07	6.68314e+07	4.99654e+07	5.89965e+07	6.19699e+07	1.05084e+08	9.47299e+07	8.98048e+07	6.65041e+07	1.07263e+08	1.10656e+08	7.00852e+07	5.52691e+07	5.70616e+07	6.32813e+07
5472pos		PE(20:1_20:4)+H	PE(40:5)+H	PE	(20:1_20:4)	(20:1)	(20:4)			C45 H81 O8 N1 P1	794.569	660.901	0.0521948	1.10059	0.323508	0.591231	6.49837e+08	3.69854e+08	7.33141e+08	4.63027e+08	6.70722e+08	4.72059e+08	2.95161e+08	6.21961e+08	4.61766e+08	5.29817e+08	5.67711e+08	5.2583e+08	4.93252e+08	4.56849e+08	5.40592e+08	4.80562e+08	6.64564e+08	4.57993e+08	4.55877e+08	4.00816e+08	5.74889e+08	5.71821e+08	6.08456e+08	5.85395e+08	4.20012e+08	4.5589e+08	4.63724e+08
5478pos		PE(18:0p_22:5)+H	PE(40:5p)+H	PE	(18:0p_22:5)	(18:0p)	(22:5)			C45 H81 O7 N1 P1	778.575	691.701	0.0555136	1.49144	0.066368	1.64871	6.66288e+08	4.21603e+08	4.25122e+08	4.68371e+08	6.33734e+08	6.17674e+08	2.13998e+08	1.1296e+09	7.69264e+08	6.45741e+08	6.63133e+08	4.86541e+08	7.29198e+08	4.7451e+08	3.70793e+08	8.20813e+08	6.46194e+08	1.3168e+09	1.00964e+09	5.59795e+08	4.51041e+08	1.07618e+09	9.86938e+08	7.8402e+08	4.46099e+08	4.97784e+08	4.81e+08
5479pos		PE(18:0p_22:5)+H	PE(40:5p)+H	PE	(18:0p_22:5)	(18:0p)	(22:5)			C45 H81 O7 N1 P1	778.575	716.991	0.0473398	1.6605	0.0502094	1.73434	2.46956e+08	3.47592e+08	1.10685e+08	4.72394e+08	4.87312e+08	2.84367e+08	4.62009e+07	7.58242e+08	5.00188e+08	3.1874e+08	1.41253e+08	2.89035e+08	5.86987e+08	2.88636e+08	1.0983e+08	2.84919e+08	1.61344e+08	9.83431e+08	7.20358e+08	7.84559e+08	2.55582e+08	7.22582e+08	7.57101e+08	7.63015e+08	3.00223e+08	3.26355e+08	3.2617e+08
5483pos		PE(40:6)+Na	PE(40:6)+Na	PE	(18:1_22:5)	(18:1)	(22:5)			C45 H78 O8 N1 P1 Na1	814.536	540.48	0.0128214	1.06162	0.718019	0.176566	9.54705e+07	4.00461e+07	9.5802e+07	5.66064e+07	3.84052e+07	6.55641e+07	2.38086e+07	4.74159e+07	6.68285e+07	3.16161e+07	4.55344e+07	2.94296e+07	4.55482e+07	3.84464e+07	3.71479e+07	6.74981e+07	1.09176e+08	5.96423e+07	5.82024e+07	7.46797e+07	2.86413e+07	5.0271e+07	4.79666e+07	7.28102e+07	4.62702e+07	4.62809e+07	4.52555e+07
5504pos		PE(18:1p_22:5)+H	PE(40:6p)+H	PE	(18:1p_22:5)	(18:1p)	(22:5)			C45 H79 O7 N1 P1	776.559	539.64	0.000797524	0.695548	0.133809	0.561353	4.82089e+07	3.13349e+07	5.72698e+07	3.0116e+07	3.63568e+07	4.46402e+07	1.2423e+07	2.93019e+07	3.49175e+07	2.54893e+07	4.90872e+07	1.82873e+07	1.64227e+07	3.10837e+07	1.51239e+07	3.2306e+07	5.23171e+07	3.38515e+07	5.99667e+07	3.53559e+07	1.70069e+07	2.38284e+07	2.98791e+07	3.99268e+07	3.06977e+07	3.07402e+07	3.07401e+07
5507pos		PE(18:0p_22:6)+H	PE(40:6p)+H	PE	(18:0p_22:6)	(18:0p)	(22:6)			C45 H79 O7 N1 P1	776.559	670.135	0.0333976	1.16126	0.308316	0.430559	5.76693e+09	5.42224e+09	5.64344e+09	5.68478e+09	7.98519e+09	6.25413e+09	2.04068e+09	9.67845e+09	7.87194e+09	6.22313e+09	6.13172e+09	5.6675e+09	5.62744e+09	5.91501e+09	4.27909e+09	8.70521e+09	5.80843e+09	8.77063e+09	1.01004e+10	6.43972e+09	6.10177e+09	8.19492e+09	9.99619e+09	9.26188e+09	5.48884e+09	5.86809e+09	5.69285e+09
5527pos		PE(40:7e)+Na	PE(40:7e)+Na	PE	(40:7e)	(40:7e)				C45 H78 O7 N1 P1 Na1	798.541	651.468	0.0182319	0.96535	0.545472	0.290184	2.97061e+07	2.76757e+07	3.24371e+07	3.18547e+07	2.94441e+07	2.65682e+07	4.95852e+07	2.70906e+07	2.88732e+07	3.2424e+07	2.98913e+07	2.42297e+07	2.74204e+07	3.03637e+07	3.37816e+07	3.10196e+07	3.0886e+07	2.63332e+07	2.73035e+07	2.81274e+07	3.15415e+07	2.37998e+07	2.5651e+07	2.53594e+07	3.54021e+07	3.54203e+07	3.65412e+07
5547pos		PE(18:1p_22:6)+H	PE(40:7p)+H	PE	(18:1p_22:6)	(18:1p)	(22:6)			C45 H77 O7 N1 P1	774.543	675.6	0.0162906	1.10144	0.390117	0.148649	4.09815e+07	4.26165e+07	3.24945e+07	5.23817e+07	3.86852e+07	3.10359e+07	3.92931e+07	4.39046e+07	4.18728e+07	5.14623e+07	4.29454e+07	4.17993e+07	3.9471e+07	4.04449e+07	4.26343e+07	4.28998e+07	4.00196e+07	4.30777e+07	4.77168e+07	4.05763e+07	6.48693e+07	4.5959e+07	4.17315e+07	3.5926e+07	4.28438e+07	4.40893e+07	4.4062e+07
554neg		LPC(18:1e)+HCOO	LPC(18:1e)+HCOO	LPC	(18:1e)	(18:1e)				C27 H55 O8 N1 P1	552.367	172.64	0.00765922	1.04398	0.825136	0.257411	7.67742e+06	1.69484e+07	7.13908e+06	6.62235e+06	1.17442e+07	1.35013e+07	2.66812e+06	1.58573e+07	1.14298e+07	1.10101e+07	5.03861e+06	6.24394e+06	1.49853e+07	5.59528e+06	3.65918e+06	9.77489e+06	6.70872e+06	1.57764e+07	1.31144e+07	9.06322e+06	4.60672e+06	9.77582e+06	1.47522e+07	1.65909e+07	8.27132e+06	8.16336e+06	8.16176e+06
5555pos		PE(18:4_22:4)+H	PE(40:8)+H	PE	(18:4_22:4)	(18:4)	(22:4)			C45 H75 O8 N1 P1	788.522	511.518	0.00344311	1.04246	0.806041	1.17447	2.86718e+09	1.22216e+09	3.40478e+09	1.44216e+09	1.51509e+09	2.11588e+09	6.01962e+08	1.89804e+09	2.22505e+09	1.22313e+09	2.02054e+09	9.49333e+08	1.44744e+09	1.33283e+09	1.10949e+09	1.86218e+09	2.98842e+09	1.72006e+09	1.80076e+09	1.85116e+09	7.09462e+08	1.71314e+09	1.71294e+09	2.44554e+09	1.52248e+09	1.51341e+09	1.52247e+09
5559pos		PE(40:8e)+H	PE(40:8e)+H	PE	(40:8e)	(40:8e)				C45 H77 O7 N1 P1	774.543	606.552	0.0383984	0.998187	0.990898	2.40573	3.6756e+09	2.78322e+09	5.06295e+09	2.78712e+09	3.12446e+09	2.26634e+09	1.6385e+09	4.39906e+09	3.65506e+09	2.77154e+09	5.28772e+09	2.88951e+09	2.74184e+09	2.61497e+09	2.6148e+09	3.5896e+09	4.3035e+09	3.39392e+09	4.88663e+09	3.05316e+09	2.13557e+09	2.88235e+09	3.135e+09	3.95396e+09	2.52304e+09	2.69716e+09	2.70005e+09
555neg		LPC(18:2)+HCOO	LPC(18:2)+HCOO	LPC	(18:2)	(18:2)				C27 H51 O9 N1 P1	564.331	88.7947	0.003215	0.73658	0.121212	3.66879	6.69458e+08	4.80963e+08	6.91058e+08	4.23257e+08	7.87694e+08	8.22638e+08	2.19367e+08	5.83423e+08	4.97444e+08	7.29454e+08	4.79649e+08	3.93008e+08	5.68225e+08	2.70854e+08	3.91031e+08	3.97396e+08	5.6346e+08	4.35321e+08	4.12175e+08	4.82165e+08	2.63074e+08	4.36737e+08	3.84007e+08	6.67583e+08	4.43222e+08	4.40765e+08	4.40762e+08
5571pos		PE(18:2p_22:6)+H	PE(40:8p)+H	PE	(18:2p_22:6)	(18:2p)	(22:6)			C45 H75 O7 N1 P1	772.528	646.26	0.0159038	0.953323	0.699471	0.324194	2.73234e+07	3.25631e+07	2.57279e+07	2.74046e+07	2.87782e+07	2.91809e+07	7.31052e+07	2.91155e+07	2.76474e+07	3.30487e+07	3.50863e+07	2.71037e+07	2.09595e+07	3.34993e+07	4.17972e+07	2.7479e+07	2.47472e+07	2.56366e+07	2.88301e+07	3.00909e+07	4.45612e+07	2.59467e+07	2.49063e+07	2.10126e+07	3.02764e+07	3.03568e+07	3.11565e+07
5575pos		PE(31:1_10:1)+H	PE(41:2)+H	PE	(31:1_10:1)	(31:1)	(10:1)			C46 H89 O8 N1 P1	814.632	729.144	0.065552	1.20867	0.194951	0.241292	6.08807e+08	1.27924e+09	1.29478e+09	1.08859e+09	1.41969e+09	1.24314e+09	9.84732e+08	1.60141e+09	1.25145e+09	1.06277e+09	1.38634e+09	8.96577e+08	8.77931e+08	1.11934e+09	1.67036e+09	9.20991e+08	1.11e+09	1.6847e+09	1.38594e+09	1.35639e+09	1.05433e+09	1.78213e+09	1.80747e+09	1.68291e+09	9.0052e+08	1.02558e+09	9.51594e+08
5593pos		PE(42:3e)+H	PE(42:3e)+H	PE	(42:3e)	(42:3e)				C47 H91 O7 N1 P1	812.653	921.947	0.0193048	1.19407	0.30508	1.70836	9.8316e+09	6.22411e+09	7.12953e+09	7.06008e+09	5.21521e+09	5.31524e+09	3.48264e+09	9.98774e+09	8.81871e+09	6.86775e+09	7.23704e+09	7.01149e+09	1.03327e+10	6.09715e+09	5.38611e+09	6.8094e+09	1.00591e+10	1.02618e+10	1.14741e+10	6.98083e+09	5.69282e+09	7.07736e+09	6.92753e+09	6.70851e+09	6.7632e+09	7.02846e+09	6.91839e+09
559neg		LPC(18:2)+HCOO	LPC(18:2)+HCOO	LPC	(18:2)	(18:2)				C27 H51 O9 N1 P1	564.331	168.208	0.0394249	0.658918	0.189409	0.794965	5.29519e+07	3.87644e+07	1.20797e+07	1.24083e+07	1.54331e+07	1.66256e+07	2.33423e+07	8.47814e+06	5.62909e+06	1.57063e+07	1.7546e+07	4.28231e+07	1.73197e+07	2.19427e+07	2.68665e+07	1.7053e+07	1.68713e+07	1.92081e+07	1.28423e+07	2.09233e+07	1.89983e+07	1.77072e+07	1.19833e+07	1.69821e+07	1.0226e+07	1.02171e+07	9.53912e+06
5603pos		PE(42:9)+H	PE(42:9)+H	PE	(42:9)	(42:9)				C47 H77 O8 N1 P1	814.538	509.852	0.0120728	1.04695	0.801694	0.231071	2.64303e+07	3.18055e+07	2.78449e+07	3.11924e+07	3.40467e+07	4.28833e+07	1.86552e+07	4.85697e+07	3.64208e+07	3.21314e+07	2.65697e+07	1.47719e+07	1.99922e+07	2.79199e+07	1.13611e+07	3.38349e+07	2.5434e+07	3.91702e+07	4.81988e+07	3.48602e+07	3.53209e+07	2.95237e+07	4.0832e+07	4.12129e+07	2.89695e+07	2.95836e+07	2.95841e+07
5609pos		PE(43:0e)+Na	PE(43:0e)+Na	PE	(43:0e)	(43:0e)				C48 H98 O7 N1 P1 Na1	854.697	814.002	0.0543238	2.29184	0.000825449	0.478906	3.59564e+06	5.56162e+06	1.14751e+06	1.84677e+07	6.86225e+06	6.60766e+06	1.07214e+07	1.78066e+07	7.24715e+06	1.60624e+07	6.18387e+06	8.01543e+06	1.46432e+07	8.20307e+06	1.36041e+06	1.21791e+07	9.60981e+06	2.44605e+07	1.2597e+07	9.55547e+06	2.06513e+07	2.2429e+07	2.76794e+07	1.63629e+07	5.7284e+06	6.34938e+06	6.24112e+06
5610pos		PE(43:4e)+Na	PE(43:4e)+Na	PE	(43:4e)	(43:4e)				C48 H90 O7 N1 P1 Na1	846.635	659.633	0.0836381	1.59243	0.0235015	0.366	1.55189e+07	1.95509e+07	2.14075e+07	2.18787e+07	3.12702e+07	1.79788e+07	6.33204e+06	4.57601e+07	2.84259e+07	2.3676e+07	1.50438e+07	2.15074e+07	2.3337e+07	2.56857e+07	5.01572e+06	3.7629e+07	2.21988e+07	5.11166e+07	2.51406e+07	2.18115e+07	2.63279e+07	3.02694e+07	4.47341e+07	4.57586e+07	2.04458e+07	2.39234e+07	2.12065e+07
5614pos		PE(22:5_22:5)+H	PE(44:10)+H	PE	(22:5_22:5)	(22:5)	(22:5)			C49 H79 O8 N1 P1	840.554	524.743	0.041893	1.11247	0.687694	0.0529194	1.4721e+07	1.47134e+07	1.38369e+07	1.59602e+07	1.14564e+07	1.73461e+07	8.48422e+06	1.82418e+07	1.47804e+07	8.70014e+06	1.32251e+07	6.04096e+06	7.37118e+06	1.17086e+07	4.49342e+06	1.47505e+07	2.14252e+07	1.69097e+07	2.01517e+07	1.35533e+07	4.82994e+06	1.74078e+07	2.24667e+07	1.21205e+07	1.17193e+07	1.26117e+07	1.26141e+07
5617pos		PE(49:3)+Na	PE(49:3)+Na	PE	(49:3)	(49:3)				C54 H102 O8 N1 P1 Na1	946.724	762.872	0.0437787	1.13903	0.401331	0.1058	5.0271e+07	4.14079e+07	3.77403e+07	5.48401e+07	4.33118e+07	3.93182e+07	3.69265e+07	5.90697e+07	4.63504e+07	3.51106e+07	4.17202e+07	4.36644e+07	3.72698e+07	3.67138e+07	4.36981e+07	3.61587e+07	6.4314e+07	6.19622e+07	7.57301e+07	3.90475e+07	4.28345e+07	6.17935e+07	5.43389e+07	7.26458e+07	3.32427e+07	3.61823e+07	3.54513e+07
5618pos		PE(51:4)+Na	PE(51:4)+Na	PE	(51:4)	(51:4)				C56 H104 O8 N1 P1 Na1	972.739	759.407	0.0377871	1.48766	0.062692	0.157887	1.00367e+07	1.08588e+07	8.74172e+06	2.15823e+07	9.52248e+06	9.21938e+06	1.47269e+07	9.6044e+06	9.48051e+06	6.79015e+06	1.53275e+07	7.63186e+06	8.52008e+06	1.09206e+07	8.53661e+06	8.3774e+06	1.43172e+07	1.7385e+07	1.44749e+07	1.11498e+07	2.14921e+07	1.51578e+07	1.48651e+07	1.47349e+07	7.73753e+06	8.26844e+06	8.26566e+06
5621pos		PG(22:3e)+NH4	PG(22:3e)+NH4	PG	(22:3e)	(22:3e)				C28 H55 O9 N1 P1	580.361	119.802	0.0490743	0.755928	0.517391	0.626231	6.03002e+07	1.8952e+07	1.80194e+08	6.68078e+07	3.35726e+07	5.61017e+07	1.66772e+08	5.44079e+07	5.16356e+07	1.46359e+08	1.26437e+08	6.65611e+07	1.01872e+07	1.57463e+08	1.43986e+08	1.43935e+08	6.10931e+07	3.69991e+07	1.17741e+08	6.21345e+07	1.34038e+08	6.26651e+07	3.37719e+07	5.10907e+07	4.85239e+07	4.88426e+07	5.29327e+07
5625pos		PG(28:6e)+Na	PG(28:6e)+Na	PG	(28:6e)	(28:6e)				C34 H57 O9 N0 P1 Na1	663.363	401.224	0.0108971	1.42856	0.186757	0.087445	2.85326e+06	1.66505e+06	3.17141e+06	4.69898e+06	5.44918e+06	4.56171e+06	3.41795e+06	5.88544e+06	5.49986e+06	4.10623e+06	3.90525e+06	1.38603e+06	2.77599e+06	3.6598e+06	1.58652e+06	2.94466e+06	3.63662e+06	7.67686e+06	3.70956e+06	5.91744e+06	2.7353e+06	4.44517e+06	6.30632e+06	4.92176e+06	4.63289e+06	4.72138e+06	4.72151e+06
[truncated: 509 more rows]

## Sheet: C_vs_M
name	DIFF	LipidIon	LipidGroup	Class	FattyAcid	FA1	FA2	FA3	FA4	IonFormula	CalMz	RT-(min)	QCRSD	Fold Change	P-value	VIP	K2	X4	K5	M8	X6	X7	K3	S5	M3	X9	K6	X8	S6	M6	K4	M7	K1	S4	X5	M4	S2	S1	S3	M2	QC-1	QC-2	QC-3
[truncated: 1,390 more rows]

## Sheet: S_vs_M
name	DIFF	LipidIon	LipidGroup	Class	FattyAcid	FA1	FA2	FA3	FA4	IonFormula	CalMz	RT-(min)	QCRSD	Fold Change	P-value	VIP	K2	X4	K5	M8	X6	X7	K3	S5	M3	X9	K6	X8	S6	M6	K4	M7	K1	S4	X5	M4	S2	S1	S3	M2	QC-1	QC-2	QC-3
[truncated: 1,390 more rows]

## Sheet: S_vs_B
name	DIFF	LipidIon	LipidGroup	Class	FattyAcid	FA1	FA2	FA3	FA4	IonFormula	CalMz	RT-(min)	QCRSD	Fold Change	P-value	VIP	K2	X4	K5	M8	X6	X7	K3	S5	M3	X9	K6	X8	S6	M6	K4	M7	K1	S4	X5	M4	S2	S1	S3	M2	QC-1	QC-2	QC-3
[truncated: 1,390 more rows]

[truncated: 2 more sheets: B_vs_M, C|S|M]
