# Supplementary material for: Ethyl acetate extract of Caesalpinia sappan L. for the treatment of atherosclerosis in ApoE−/− mice and its mechanism
Source: Royal Society of Chemistry journal article supplement (doi:10.1039/d2mo00254j), 2022-10-07
Supplement: d2mo00254j7.pdf [file d2mo00254j7.pdf]

Please use files  
tab to view  
raw data  
supplied in  
Excel tables  
and in .rar
